# Supplementary material for: Systematic metadata analysis of brown rot fungi gene expression data reveals the genes involved in Fenton’s reaction and wood decay process
Source: Mycology. 2019 Dec 24;11(1):22–37. doi: 10.1080/21501203.2019.1703052 (PMC7033688; doi:10.1080/21501203.2019.1703052)
Supplement: Supplemental Material [file TMYC_A_1703052_SM9374.xlsx]

## Sheet: Common-Genome comparison
R.placenta|W.cocos|C. puteana|S.lacrymans|H.pinastri|F.radiculos	R.placenta|W.cocos	Elements only in R.placenta :	Elements only in W.cocos :	Elements only in C. puteana :	Elements only in S.lacrymans :	Elements only in H.pinastri :	Elements only in F.radiculos :
1-(5-Phosphoribosyl)-5-amino-4-imidazole-carboxylate (AIR) carboxylase	Erythromycin esterase	2Fe-2S ferredoxin, iron-sulfur binding site	FG-GAP	Paired box protein, N-terminal	Glucose inhibited division protein	Protein of unknown function DUF395, YeeE/YedE	Protein of unknown function DUF388
1-aminocyclopropane-1-carboxylate synthase	G-protein alpha subunit_ group 12	2OG-Fe(II) oxygenase superfamily	Blood group Rhesus C/E and D polypeptide	Thrombospondin, type I	Archaeal flagellin, N-terminal related	Ribosomal protein S10, bacterial	Avirulence B/C
20S proteasome_ A and B subunits	Molluscan rhodopsin C-terminal tail	3-hydroxyacyl-CoA dehydrogenase, NAD-binding	ADP-glucose pyrophosphorylase, conserved site	DNA-binding protein Dps	Alpha-2-macroglobulin	Glycoside hydrolase, family 25, active site	Trigger factor, C-terminal, bacterial
26S proteasome subunit P45		4Fe-4S ferredoxin, iron-sulfur binding	Transmembrane di-haem cytochrome	Prismane-like	P-II protein urydylation site	Ribonuclease U2	S-adenosyl-L-methionine dependent methyltransferase, YbcY, predicted
2-nitropropane dioxygenase_ NPD	R.placenta|C. puteana	5'-3' exonuclease, C-terminal	Propeptide, peptidase M4 and M36	NUDIX hydrolase, conserved site	Plant lipid transfer protein/Par allergen	Asp/Glu/hydantoin racemase	Haem oxygenase
2-oxo acid dehydrogenase_ lipoyl-binding site	2_3-dihydro-2_3-dihydroxybenzoate dehydrogenase	5'3'-Exonuclease N- and I-domain	Complement control module	Glycosyl hydrolases family 32, N-terminal	Nitrate reductase NADH dependant	Parathyroid hormone	DNA repair and recombination, RecA-like
3'-5' exonuclease	C-type lectin	60 kDa inner membrane protein	Germin	Glycosyl hydrolase family 32, C-terminal	Oestrogen receptor, AF1 modulatory	Methyl-coenzyme M reductase, gamma subunit	DNA repair protein RAD51
3-beta hydroxysteroid dehydrogenase/isomerase	Histone-like bacterial DNA-binding protein	7-Fold repeat in clathrin and VPS proteins	Extradiol aromatic ring-opening dioxygenase, DODA type	Glycoside hydrolase, family 32	Aromatic prenyltransferase, DMATS type	Fumarylacetoacetase, N-terminal	Antibiotic biosynthesis monooxygenase
3-hydroxyacyl-CoA dehydrogenase_ C-terminal	Ribosomal protein L31	AAA ATPase	Negative regulatory factor PREG	Bacterial regulatory protein, DeoR N-terminal	Plant virus icosahedral capsid protein, 'S' region	Translation elongation factor P/YeiP, conserved site	Peptidase C14, ICE, catalytic subunit p20
3-oxo-5-alpha-steroid 4-dehydrogenase_ C-terminal	Vitamin K-dependent carboxylation/gamma-carboxyglutamic region	AAA ATPase, central region	Protein-tyrosine phosphatase, low molecular weight, mammalian	Signal transduction response regulator, chemotaxis, protein-glutamate methylesterase	BB1	Invasin/intimin cell-adhesion	Glycoside hydrolase, family 43, endo-1, 5-alpha-L-arabinosidase
4'-phosphopantetheinyl transferase		AAA-protein subdomain	Type II secretion system protein E	Protein of unknown function DUF307	Ribosomal protein L41	Nuclear transition protein 2	Region of unknown function DUF1745
5'-Nucleotidase and apyrase	R.placenta|H.pinastri	ABC transporter	Transcription elongation factor, GreA/GreB region, prokaryotic	Vpu protein, cytoplasmic	CinA, C-terminal	Tetracycline transcriptional regulator, TetR-related, C-terminal	Hedgehog/DD-peptidase, zinc-binding motif
5'-Nucleotidase_ C-terminal	Flavin-containing amine oxidase	Actin-binding, actinin-type	Nnf1	Pectinesterase inhibitor	Herpesvirus glycoprotein D	CD59 antigen	M penetrans paralogue 2
ABC transporter_ transmembrane region	NB-ARC	Acyl transferase region	Protease inhibitor I8, cysteine-rich trypsin inhibitor-like	Tetratricopeptide TPR-3	IHF-like DNA-binding	CO dehydrogenase flavoprotein, C-terminal	Cytidine and deoxycytidylate deaminase, zinc-binding region
AB-hydrolase associated lipase region		Acyl-CoA dehydrogenase	Peptidase C45, acyl-coenzyme A:6-aminopenicillanic acid acyl-transferase	HNS-dependent expression A	Cadherin	Mechanosensitive ion channel MscS, transmembrane-2	Carboxypeptidase-like, regulatory region
Acetamidase/Formamidase	W.cocos|C. puteana	Acyl-CoA dehydrogenase, central region	TT viral ORF2 protein	Carbohydrate-binding, CenC-like	Copper type II, ascorbate-dependent monooxygenase, C-terminal	Aspartate transcarbamylase regulatory subunit	Soluble quinoprotein glucose dehydrogenase
Acetoacetyl-CoA synthase	Carboxymuconolactone decarboxylase	Acyl-CoA dehydrogenase, C-terminal	Coagulation factor 5/8 type, C-terminal	Intermediate filament protein	Nitrilase/cyanide hydratase, conserved site	Nickel/cobalt transporter, high-affinity	Neuraxin/MAP1B repeat
Actin/actin-like	O-methyltransferase_ COMT_ eukaryota	Acyl-coA-binding protein, ACBP	Integrase, C-terminal, retroviral	Immunoglobulin/albumin-binding	Plant methyltransferase dimerisation	Glycoside hydrolase, family 34	N-acetylmuramoyl-L-alanine amidase, family 2
Actin-binding_ cofilin/tropomyosin type	Homeobox protein_ antennapedia type	Adaptin, N-terminal	Putative methylase	Methanol dehydrogenase, beta subunit	Trigger factor, ribosome-binding, bacterial	Zinc finger, BED-type predicted	Spondin, N-terminal
Acyl-CoA dehydrogenase_ N-terminal	Cytosolic fatty-acid binding	Aerolysin/hemolysin toxin	Phosphotransferase/anion transporter	KDPG and KHG aldolase	Krueppel-associated box	Histone methyltransferase, PBCV type putative	Monooxygenase component MmoB/DmpM
Acyl-CoA thioesterase	Atrophin	Alpha amylase, catalytic region	CENP-B, N-terminal DNA-binding	Glycosyl transferase, family 25	Orn/Lys/Arg decarboxylase, major region	Methyltransferase small	Toxin, beta-grasp, Staphylococcal/Streptococcal
Adenine nucleotide translocator 1	Zinc finger_ C2HC5-type	Alpha amylase, catalytic subdomain	ELM2	Treacher Collins syndrome, treacle	Fungal fucose-specific lectin	MORN motif	ATPase, P-type copper-transporter
Adenosine deaminase/editase	NusB/RsmB/TIM44	Alpha/beta hydrolase fold	Glycoside hydrolase, 48F	Ribosomal protein L10, eubacterial, conserved site	Transcription factor, T-box	Neuromedin U	Protein of unknown function DUF1687, fungi
Adenosine/AMP deaminase	Iron-sulphur cluster loop	Alpha-isopropylmalate/homocitrate synthase	Ubiquinone biosynthesis protein COQ9	Phthalate dioxygenase reductase, FPNCR module	Collagen triple helix repeat	Proteinase inhibitor I19, pacifastin	Ribonucleotide reductase, stirrup
ADP-ribosylation factor	GDPGTP exchange factor Sec2p	Amidase	ThiamineS	Globin, subset	Bacterial regulatory protein, LacI	Protein of unknown function Cys-rich	Ribosomal protein L40e
Adrenodoxin reductase	Aspartic acid and asparagine hydroxylation site	Amidohydrolase	Proline racemase	Protein of unknown function DUF1892	Protein of unknown function DUF1893	Pyranose oxidase	Protein of unknown function DUF1778
AFG1-like ATPase	Bacterial extracellular solute-binding family 1_ conserved site	Amino acid permease	Receptor tyrosine kinase, class II, conserved site	Haemagglutinin, influenza A/B virus type, HA1/HA2 chain	Marvel	SEC-C motif	Telomere reverse transcriptase
AICARFT/IMPCHase bienzyme		Amino acid/polyamine transporter II	Potassium channel, two pore-domain	DNA polymerase III chi subunit, HolC	Ribonuclease P/MRP, p29 subunit, eukaryotic	Predicted HAD-superfamily phosphatase, subfamily IA/Epoxide hydrolase, N-terminal	Bacterial regulatory protein, MarR
AIR synthase related protein	W.cocos|S.lacrymans	Aminoacyl-transfer RNA synthetase, class II	Protein of unknown function DUF1772, fungi	Speract/scavenger receptor	Transcriptional regulator, TetR-like, DNA-binding, bacterial/archaeal	Adipokinetic hormone, conserved site	Cysteinyl-tRNA synthetase, class Ia, DALR
AIR synthase related protein_ C-terminal	Mitochondrial ribosomal protein L31_ fungi_ predicted	Aminoacyl-tRNA synthetase, class I	Myoactive tetradecapeptides	Cutinase	Bacterial chromosomal replication initiator protein, DnaA	Frizzled cysteine-rich domain	GPCR, rhodopsin-like superfamily
Aldehyde dehydrogenase	TNFR/CD27/30/40/95 cysteine-rich region	Aminotransferase, class-II	HAD-superfamily hydrolase, subfamily IA, REG-2-like	PalH/RIM21	Peptidase S15	Bacterial regulatory protein, Crp	Binding-protein-dependent transport systems inner membrane component
Aldo/keto reductase	DNA helicase_ Holliday junction RuvA type_ C-terminal domain III	Anaphase-promoting complex subunit 10	Kringle	Conserved hypothetical protein CHP00103	Integral peroxisomal membrane peroxin	PEP-utilising enzyme, mobile region	Viral A-type inclusion protein repeat
Allergen V5/Tpx-1 related	Spen paralogue and orthologue C-terminal	Animal haem peroxidase	Metchnikowin	Glyoxalase/extradiol ring-cleavage dioxygenase	Uroporphyrin-III C-methyltransferase, C-terminal	6-phospho-beta-galactosidase, eukaryotic	Leucine-rich repeat 3
Alpha/beta hydrolase	Leucine-rich repeat_ N-terminal	Arginase/agmatinase/formiminoglutamase	Autophagy protein 17	Neuraminidase	Deoxyribonuclease I, eukarya	Transcription factor, SBP-box	Copper ion-binding
Alpha-L-arabinofuranosidase_ C-terminal	Tctex-1	ARM repeat fold	Methyl-coenzyme M reductase, ferredoxin-like fold	ROK	Phosphotransferase system, sorbose subfamily IIB component	NADH/Ubiquinone/plastoquinone (complex I)	Signal transduction response regulator, C-terminal effector
Amidohydrolase 2	Lysidine-tRNA(Ile) synthetase_ N-terminal	Arrestin, C-terminal	Ribbon-helix-helix	Haemolysin-type calcium-binding region	Histone acetyltransferase type B, catalytic subunit	NADH dehydrogenase subunit 5, C-terminal	Colipase
Amidohydrolase-like	Gonadotropin_ beta chain	Arrestin, N-terminal	Bee antimicrobial peptide	Ubiquitin carboxyl-terminal hydrolase, N-terminal region 2	Sulphate/thiosulphate-binding, conserved site	Egg jelly receptor, REJ-like	Bifunctional inhibitor/plant lipid transfer protein/seed storage
Amine oxidase		Aspartate kinase	Aryldialkylphosphatase	Hemocyanin, copper-containing	Ent-kaurene synthase, fungal	Molybdopterin oxidoreductase, prokaryotic, conserved site	Protamine P1
Amino acid permease-associated region	W.cocos|H.pinastri	ATP/GTP-binding site motif A (P-loop)	B-block binding subunit of TFIIIC	PRC-barrel-like	Phospholipase C, phosphoinositol-specific, EF-hand-like	Esterase, PHB depolymerase	Meiotic recombinase Dmc1
Amino acid/polyamine transporter I	Sfi1 spindle body	ATPase, E1-E2 type	Dysferlin, C-terminal	SecA Wing and Scaffold	Myelin P0 protein	Alba, DNA/RNA-binding protein	AraC protein, arabinose-binding/dimerisation
Amino acid-binding ACT	Sulphatase	ATP-dependent carboxylate-amine ligase-like, ATP-grasp	Caldesmon and lymphocyte specific protein	Peptidase M54, archaemetzincin	Carbohydrate-binding	Protein of unknown function DUF48	Transposase, IS4-like
Aminoacyl-tRNA synthetase_ class Ia	4-diphosphocytidyl-2C-methyl-D-erythritol synthase	ATP-dependent DNA helicase RecQ	Insulin/IGF/relaxin	Phosphatidylethanolamine-binding, conserved site	Wilm's tumour protein	Gamma-crystallin related	Protein of unknown function DUF448
Aminotransferase class-III	D-amino acid oxidase_ conserved site	ATP-dependent helicase, DEAD-box	Glycosyl transferase, family 17	Sugar 1,4-lactone oxidases	Protein of unknown function DUF1878	L-asparaginase, type I
Aminotransferase_ class I and II	L-lactate dehydrogenase	ATP-dependent helicase, DEAH-box	Amyloidogenic glycoprotein, copper-binding	Tropoelastin	Hamartin	DNA-binding, integrase-type
Aminotransferase_ class IV	Twin-arginine translocation pathway signal	Autophagy protein Apg6	Membrane attack complex component/perforin/complement C9	Arylesterase	Death associated protein 3	Interleukin-1
AMP-dependent synthetase and ligase	Interleukin-6/G-CSF/MGF	Auxin Efflux Carrier	Plexin-like fold	Transcriptional regulator, GCM-like	Molybdate/tungstate binding	Saposin type A
Ankyrin	Surface protein from Gram-positive cocci_ anchor region	Bacterial ice-nucleation proteins octamer repeat	DNA polymerase III, psi subunit	Major royal jelly protein	Tryptophan dimethylallyltransferase	Polyhedrin
Annexin		Bacterial rhodopsin	5'-Nucleotidase, conserved site	ERK1/2 MAP kinase	Flagellar assembly protein FliH	Glutamate 5-kinase, pro-B
Anthranilate synthase component I and chorismate binding protein		Bacterial sensor protein, C-terminal	Nicotinate-nucleotide-dimethylbenzimidazole phosphoribosyltransferase-like, core	Glycoside hydrolase, family 81	Cytochrome P450, E-class, CYP52	Semaphorin/CD100 antigen
Anthranilate synthase component I_ N-terminal	C. puteana|S.lacrymans	Bacterial/Archaeal inorganic pyrophosphatase		TAFII-230 TBP-binding	Geminivirus AL1 coat protein	Ferredoxin thioredoxin reductase, beta subunit-like
Anticodon-binding	Four-helical cytokine-like_ core	Baculovirus inhibitor of apoptosis protein repeat (BIR)		Cellulose-binding, family II, bacterial type	Geminivirus AL1 coat protein, CLV type
Appr-1-p processing	RNA polymerase II transcription mediator	Beta G-protein (transducin)		Protein of unknown function DUF1486	Second mitochondria-derived activator of caspase/direct IAP-binding protein with low PI-like
ARF/SAR superfamily	Xylose isomerase	Beta-ketoacyl synthase		Vitamin B12 dependent methionine synthase, activation region
Arginine biosynthesis protein ArgJ	Cysteine desulphurase_ NifS	C2		Mitochondrial proteolipid
Argonaute and Dicer protein_ PAZ	Eukaryotic translation initiation factor 3 subunit 8_ C-terminal	Ca2+/Na+ channel, pore region		Aconitase B, HEAT-like, bacterial
Aromatic-ring hydroxylase	Meiotic recombination Spo11	Calcium-binding protein, S-100/ICaBP type		Formate C-acetyltransferase glycine radical
ARP2/3 complex_ 21 kDa p21-Arc subunit	Kinesin light chain	cAMP-dependent protein kinase		Cupin 4
Asparaginase/glutaminase	HI0933-like protein	cAMP-dependent protein kinase regulator, type II PKA R subunit		Colicin immunity protein/pyocin immunity protein
Asparaginyl-tRNA synthetase_ class IIb	Four F5 protein	CAP protein		PAS fold-4
Aspartate/glutamate/uridylate kinase	Cellulosome enzyme_ dockerin type I_ calcium-binding motif	CAP-Gly		Insulin-like
Aspartyl-tRNA synthetase_ class IIb	Phosphatidate cytidylyltransferase_ eukaryota	Carbamoyl-phosphate synthase L chain, ATP-binding		RbsD or FucU transport
ATP-binding region_ ATPase-like	Alpha-L-fucosidase	Carbohydrate kinase, PfkB		Pentaxin
ATP-citrate lyase/succinyl-CoA ligase	Ribulose bisphosphate carboxylase_ large subunit_ C-terminal	Carbohydrate-binding domain, family V/XII		Region of unknown function DUF1936
ATP-dependent DNA ligase	Vinculin/alpha-catenin	Caspase-1, p20		SmpB protein
Bacterial bifunctional deaminase-reductase_ C-terminal	Cytochrome b561 / ferric reductase transmembrane	Cation (not K+) channel, TM region
Bacterial surface antigen (D15)	Negative transcriptional regulator	Cation channel, non-ligand gated
Band 7 protein	Nitrogenase component 1_ conserved site	Cation transporting ATPase
Barwin-related endoglucanase	Phospholipase A2_ active site	Cation transporting ATPase, C-terminal
Basic helix-loop-helix dimerisation region bHLH		Cation transporting ATPase, N-terminal
Basic-leucine zipper (bZIP) transcription factor	C. puteana|H.pinastri	CBF/Mak21
Beta tubulin	Peptidase G1_ eqolisin	CBS
Beta-Ig-H3/fasciclin	MHC classes I and II-like antigen recognition	Cellular retinaldehyde-binding)/triple function, C-terminal
Beta-lactamase	Isopenicillin N synthase_ conserved site	Centromere protein B, DNA-binding region
Beta-lactamase-like	RNA binding motif	Chaperonin TCP-1
Biotin/lipoate A/B protein ligase	Glucagon/GIP/secretin/VIP	Chorion 2
Biotin/lipoyl attachment	Proteinase inhibitor I3_ Kunitz legume	Chromo
BolA-like protein	Ribosomal protein P2	CHY zinc finger
BRCT	Cytochrome c oxidase_ subunit I	Citrate synthase
Bromo adjacent region	Glycoside hydrolase_ family 7	Clathrin adaptor complex, medium chain
Bromodomain	Hemerythrin-like_ metal-binding	Coatomer epsilon subunit
BSD	Superoxide dismutase_ Nickel-type	Coatomer WD associated region
BTB/POZ	Integrin alpha chain_ C-terminal cytoplasmic region	Cobalamin synthesis protein/P47K
Bucentaur or craniofacial development	Cytochrome c oxidase_ subunit VIIa_ fungal	Conserved hypothetical protein 730
C4-dicarboxylate transporter/malic acid transport protein	HAD-superfamily hydrolase_ subfamily IIA_ hypothetical 2	Copper-translocating P-type ATPase
C-5 cytosine-specific DNA methylase	Long hematopoietin receptor_ gp130 family 2_ conserved site	Copper-transporting ATPase
Calcium/proton exchanger superfamily		CPSF A subunit, C-terminal
Calcium-binding EF-hand	S.lacrymans|H.pinastri	Cullin
Calcium-transporting P-type ATPase_ PMR1-type	Stress responsive alpha-beta barrel	Cupin
Calponin-like actin-binding	Helix-turn-helix_ Psq	Cupin region
Carbohydrate kinase_ FGGY	Polysaccharide lyase family 8_ central	Cyclase-associated protein
Carboxylesterase_ type B	Nitrite reductase [NAD(P)H] large subunit_ NirB	Cys/Met metabolism pyridoxal-phosphate-dependent enzymes
Casein kinase II_ regulatory subunit	Nitrite reductase [NAD(P)H] large subunit_ NirD	Cysteine synthase/cystathionine beta-synthase P-phosphate-binding site
Catalase	Protein of unknown function_ YqcI/YcgG	Cytidine/deoxycytidylate deaminase, zinc-binding region
Catalase-related	Chitin-binding_ domain 3	Cytochrome b/b6, N-terminal
Catalytic domain of components of various dehydrogenase complexes	Gelsolin	Cytochrome c heme-binding site
Catechol dioxygenase_ N-terminal	Targeting for Xklp2	Cytochrome oxidase c, subunit VIb
Cation efflux protein	Uncharacterised conserved protein UCP010044	DAHP synthetase I/KDSA superfamily
Cation transporter	Pili assembly chaperone_ C-terminal_ bacterial	DEAD/DEAH box helicase
CbxX/CfqX	Dysferlin_ N-terminal	DEAD/DEAH box helicase, N-terminal
CCAAT-binding transcription factor_ subunit B	Ribonuclease H1_ eukaryote	DEAD_2
CD9/CD37/CD63 antigen	Thiamin pyrophosphokinase_ eukaryotic	Delta-aminolevulinic acid dehydratase
Cdc20/Fizzy	Guanine deaminase	DEXDc2
CDC24 calponin	D-hydantoinase	DH
CDC45-like protein	tRNA pseudouridine synthase B_ N-terminal_ bacterial-type	Dihydroorotase
Cdk-activating kinase assembly factor (MAT1)	Sporulation stage II_ protein E C-terminal	Diphthamide synthesis DPH2 protein
CDP-alcohol phosphatidyltransferase		Disease resistance protein
CDR ABC transporter	R.placenta|W.cocos|S.lacrymans	DNA mismatch repair protein
Cell division/GTP binding protein	MHCK/EF2 kinase	DNA mismatch repair protein Mlh1
Cell surface receptor IPT/TIG		DNA photolyase, FAD- binding N-terminal
Cellular retinaldehyde-binding/triple function_ N-terminal	R.placenta|W.cocos|H.pinastri	DNA photolyase, FAD-binding
Cerato-platanin	Fungal fruit body lectin	DNA polymerase B, exonuclease
Chaperonin clpA/B	Pistil-specific extensin-like protein	DNA polymerase, beta-like region
Chaperonin Cpn60	Potassium transport protein_ high-affinity	DNA topoisomerase I
Chaperonin Cpn60/TCP-1		DNA topoisomerase I, ATP-binding
CHCH	R.placenta|C. puteana|S.lacrymans	DNA topoisomerase I, DNA-binding
Checkpoint protein Rad24	Bacterial extracellular solute-binding protein_ family 3	DNA topoisomerase II
Chitinase II	EGF-like	DNA topoisomerase, type II
Chloroperoxidase		DNA-binding WRKY
Chorismate synthase	R.placenta|C. puteana|H.pinastri	DNA-directed DNA polymerase
Class I peptide chain release factor	Rubredoxin	DNA-directed DNA polymerase B
CoA-binding	Spo12	DNA-directed RNA polymerase, 30-40 kDa subunit
Cof protein		Dual specificity protein phosphatase
Complex 1 LYR protein	R.placenta|S.lacrymans|H.pinastri	Dynamin
Copper amine oxidase	SLA1 homology domain 1_ SHD1	EB1 protein
Copper fist DNA-binding		E-class P450, group I
Copper-transporting ATPase 1	W.cocos|C. puteana|S.lacrymans	E-class P450, group IV
Coproporphyrinogen III oxidase	Proteinase inhibitor I25_ cystatin	EF-Hand-like
CsbD-like	Mitochondrial brown fat uncoupling protein	Electron transfer flavoprotein beta-subunit
CTLH_ C-terminal to LisH motif	DNA polymerase eta	Elongation factor G, C-terminal
Ctr copper transporter	Proteinase inhibitor I2_ Kunitz metazoa	Elongation factor G, domain IV
Cupredoxin	Adenine phosphoribosyl transferase	Elongation factor Ts
CutC	Histone promoter control 2 (HPC2)	Elongation factor Tu, C-terminal
Cwf15/Cwc15 cell cycle control protein	Dedicator of cytokinesis	Elongation factor Tu, domain 2
Cyclic nucleotide-binding	CDP-diacylglycerol-inositol 3-phosphatidyltransferase_ eukaryote	Endonuclease III, HhH
Cyclin	Adenylate cyclase-associated CAP	Endoplasmic reticulum targeting sequence
Cyclin_ C-terminal	Cytochrome c and b562	Enoyl-CoA hydratase/isomerase
Cyclin_ N-terminal	Arv1-like protein	EPSP synthase (3-phosphoshikimate 1-carboxyvinyltransferase)
Cyclin-like F-box		ERCC4
Cyclopropane-fatty-acyl-phospholipid synthase	W.cocos|C. puteana|H.pinastri	Esterase/lipase/thioesterase
Cystinosin/ERS1p repeat	Protein of unknown function DUF1399	Eubacterial/plasma membrane H+-transporting two-sector ATPase, C subunit
Cytidine deaminase_ homotetrameric	Sgf11_ transcriptional regulation	Eukaryotic glutathione synthase
Cytidylyltransferase	Glutaminyl-tRNA synthetase_ class Ic_ non-specific RNA-binding region part 1	Eukaryotic glutathione synthase, ATP-binding
Cytochrome b5	Pseudouridine synthase_ conserved site	Eukaryotic protein of unknown function DUF292
Cytochrome c oxidase assembly protein CtaG/Cox11	Ubiquitin binding protein_ Hrs/VPS27	Eukaryotic protein of unknown function DUF829
Cytochrome c_ class I	Nuclear receptor coactivator_ interlocking	Eukaryotic protein of unknown function DUF846
Cytochrome c_ class IA/ IB	Lethal giant larvae (Lgl) like_ C-terminal	Eukaryotic protein of unknown function DUF850
Cytochrome P450	GLE1-like	Eukaryotic protein of unknown function DUF873
D111/G-patch	Protein of unknown function DUF423	Eukaryotic ribosomal protein L5
Dcp1-like decapping	Synthesis of cytochrome c oxidase_ Sco1/Sco2	Exosome-associated
Dcp2_ box A	ATP adenylyltransferase	Exportin-t
DDT	Protein of Unknown function DUF1690	FAD-binding
Delta crystallin	Recombinase_ conserved site	Fatty acid desaturase
Der1-like	Asp/Glu racemase	Fatty acid desaturase subdomain
Dienelactone hydrolase		Ferric reductase-like transmembrane component
Dihydroneopterin aldolase	W.cocos|S.lacrymans|H.pinastri	Flavoprotein monooxygenase
Dihydroorotase region	Exon junction complex_ Pym	FMN/related compound-binding core
Dihydrouridine synthase_ DuS	Dynein light chain-related	Galactose-1-phosphate uridyl transferase
Dihydroxy-acid and 6-phosphogluconate dehydratase	Dolichol phosphate-mannose biosynthesis regulatory	Generic methyltransferase
Dihydroxy-acid dehydratase	Oligosaccharide biosynthesis protein Alg14 like	GHMP kinase, ATP-binding region
Dimeric alpha-beta barrel	mRNA capping enzyme_ alpha subunit	Glucan 1,4-alpha-glucosidase with starch-binding domain
Diphthine synthase	Glutamate-5-semialdehyde dehydrogenase	Glycoside hydrolase family 2, immunoglobulin-like beta-sandwich domain
D-isomer specific 2-hydroxyacid dehydrogenase_ catalytic region	Arginine-tRNA-protein transferase_ N-terminal	Glycoside hydrolase, family 18
D-isomer specific 2-hydroxyacid dehydrogenase_ NAD-binding	Arginine-tRNA--protein transferase 1_ eukaryotic	Glycoside hydrolase, starch-binding
Di-trans-poly-cis-decaprenylcistransferase	Ribosomal protein L36	GMC oxidoreductase
DNA mismatch repair protein MutS_ C-terminal	DNA polymerase alpha_ subunit B	G-protein beta WD-40 repeat
DNA mismatch repair protein MutS_ N-terminal	Histone H4 acetyltransferase_ NuA4 complex_ Eaf6	GRF zinc finger
DNA photolyase_ N-terminal	Homoserine kinase	GTP1/OBG domain
DNA polymerase V	Cytochrome P450_ B-class	GTP-binding signal recognition particle SRP54, G-domain
DNA repair metallo-beta-lactamase	ATPase_ F0 complex_ subunit E_ mitochondrial	Guanylate cyclase
DNA repair protein (XPGC)/yeast Rad	Uroporphiryn-III C-methyltransferase_ conserved site	H+-transporting two-sector ATPase, alpha/beta subunit, central region
DNA repair protein rad10	Succinic semialdehyde dehydrogenase	H+-transporting two-sector ATPase, alpha/beta subunit, C-terminal
DNA-binding HORMA	Pyrimidine 5-nucleotidase	H+-transporting two-sector ATPase, C subunit
DNA-binding_ yeast	3-isopropylmalate dehydratase_ fused small/large subunits	HAD-superfamily subfamily IB hydrolase, hypothetical 1
Double-stranded RNA binding	TFIIH basal transcription factor complex_ subunit SSL1	Haloacid dehalogenase/epoxide hydrolase
DSS1/SEM1	Import inner membrane translocase_ TIM44 subunit_ mitochondria	HCO3-transporter
D-xylulose 5-phosphate/D-fructose 6-phosphate phosphoketolase	Ribonuclease P_ Rpp40	Heavy metal binding
Dynamin GTPase effector	Small-subunit processome_ Utp3	Helicase c2
E1-E2 ATPase-associated region	Exosome-associated factor Rrp6_ N-terminal	Helicase, C-terminal
E3 binding		Helix-turn-helix motif, lambda-like repressor
EAP30	C. puteana|S.lacrymans|H.pinastri	Histidine kinase
eIF4-gamma/eIF5/eIF2-epsilon	High mobility group box_ HMG1/HMG2_ subgroup	Histidine kinase A, N-terminal
Electron transfer flavoprotein_ alpha subunit	GH3 auxin-responsive promoter	Histidine kinase, HAMP region
Elongator protein 3/MiaB/NifB	Protein of unknown function DUF887_ TLC-like	Histone-fold/TFIID-TAF/NF-Y
Emopamil-binding	Glycoside hydrolase_ family 76	Histone-like transcription factor/archaeal histone/topoisomerase
emp24/gp25L/p24	Cryptochrome/DNA photolyase_ class 1	HIT Zn-finger
Endonuclease/exonuclease/phosphatase	Methylated-DNA-[protein]-cysteine S-methyltransferase_ active site	HIV negative factor Nef
Endoribonuclease L-PSP	Coprinus cinereus mating-type protein	HMG1/2 (high mobility group) box
Epoxide hydrolase	Carbohydrate-binding family 9/cellobiose dehydrogenase_ cytochrome	HMG-CoA lyase-like
Epoxide hydrolase_ N-terminal	Glycoside hydrolase_ family 25	HPr histidine phosphorylation site
EPS15 homology (EH)	Glycoside hydrolase_ family 29 (alpha-L-fucosidase)	HPr serine phosphorylation site
ER lumen protein retaining receptor	Dolichol-phosphate mannosyltransferase subunit 3	Hpt
Erv1/Alr	Fructose-bisphosphate aldolase_ class-I	HRDC
Eukaryotic initiation factor 1A (eIF-1A)	Glycoside hydrolase family 13	HSF/ETS, DNA-binding
Eukaryotic initiation factor 5A hypusine (eIF-5A)	Phospholipase D_ phosphatidylserine synthase type	Human Rev interacting-like protein (hRIP)
Eukaryotic molybdopterin oxidoreductase	Glycoside hydrolase_ family 6	Hydroxyacid dehydrogenase/reductase
Eukaryotic translation initiation factor 2_ alpha subunit	1_ 4-beta cellobiohydrolase	Hydroxyethylthiazole kinase, monofunctional
Eukaryotic translation initiation factor 3 subunit 8_ N-terminal	HbrB-like	Hydroxymethylglutaryl-coenzyme A reductase
Eukaryotic translation initiation factor 3_ subunit 7	Glycosyl transferase_ family 3_ N-terminal	HypB/UreG, nucleotide-binding
Eukaryotic translation initiation factor 4E (eIF-4E)	Ribophorin II	Immunoglobulin/major histocompatibility complex
Eukaryotic translation initiation factor SUI1	Class II aldolase/adducin_ N-terminal	Initiation factor 2B
EVH1	Tachykinin/Neurokinin like_ conserved site	Initiation factor eIF-4 gamma, middle
Exodeoxyribonuclease III xth	RNA polymerase sigma factor_ regions 3 and 4	Intradiol ring-cleavage dioxygenase
Expansin 45_ endoglucanase-like	TspO/MBR-related protein	Ion transport protein
F-actin capping protein_ alpha subunit	Methylthioribulose-1-phosphate dehydratase	Isoflavone reductase
FAD linked oxidase_ N-terminal	Zinc finger_ TRAF-type	K+ channel, pore region
FAD-dependent pyridine nucleotide-disulphide oxidoreductase	Protein of unknown function UPF0172	KCNAB voltage-gated K+ channel, beta subunit
Fatty acid desaturase_ type 1	Vault protein inter-alpha-trypsin_ metazoa	Kelch
FF	Vault protein inter-alpha-trypsin	Kelch repeat
Fip1	Transposon_ En/Spm-like	KH
Flavin-containing monooxygenase FMO	Eight-Twenty-One	KH, type 1
Flavodoxin/nitric oxide synthase		Krr1
Flavodoxin-like	R.placenta|W.cocos|S.lacrymans|H.pinastri	Ku
Flavoprotein	Nitrate transporter	Lanthionine synthetase C-like
Flavoprotein pyridine nucleotide cytochrome reductase		Late embryogenesis abundant protein
FMN-dependent alpha-hydroxy acid dehydrogenase	R.placenta|C. puteana|S.lacrymans|H.pinastri	Leucine-rich repeat, cysteine-containing
Fork head transcription factor	Blue (type 1) copper domain	Leucine-rich repeat, cysteine-containing type
Forkhead-associated	Chromogranin/secretogranin	Lipolytic enzyme
Formate/nitrite transporter	Filamentation induced by cAMP protein Fic	Lipolytic enzyme, G-D-S-L
Formyl transferase_ N-terminal	Immunoglobulin-like	Lipolytic enzyme, G-D-S-L, active site
Fructose-2_6-bisphosphatase		Lissencephaly type-1-like homology motif
Fumarate hydratase_ class II	W.cocos|C. puteana|S.lacrymans|H.pinastri	L-lactate dehydrogenase, cytochrome
Fumarate lyase	TRAPP I complex_ Trs31	MAP kinase
FUN14	Tricalbin	Metal-dependent phosphohydrolase, HD subdomain
Fungal chitin synthase	MED6 mediator	Methylated-DNA-[protein]-cysteine S-methyltransferase
Fungal G-protein_ alpha subunit	Frataxin_ subgroup	Mitochondrial ribosomal protein L5
Fungal hydrophobin	Guanine nucleotide-binding protein_ beta subunit	MMS19, N-terminal
Fungal pheromone STE3 GPCR	Ribosomal protein L28e	Mo-co oxidoreductase dimerisation domain
Fungal specific transcription factor	ATPase_ F0 complex_ subunit J	Molybdenum cofactor biosynthesis protein
Fungal transcriptional regulatory protein_ N-terminal	Cysteine desulphurase	Mrp
FY-rich_ C-terminal	G-protein_ gamma-like subunit	MutS II
FY-rich_ N-terminal	Zinc finger_ AN1-type	MutS III
GAF	Alanine dehydrogenase/pyridine nucleotide transhydrogenase_ conserved site-2	MutS IV
Galactose-1-phosphate uridyl transferase_ class I	Phospholipase D_ eukaryota	N-6 Adenine-specific DNA methylase
Galactose-1-phosphate uridyl transferase_ C-terminal	Signal transduction histidine kinase_ phosphotransfer (Hpt) region	N-acetylglucosamine-6-phosphate deacetylase
Galactose-1-phosphate uridyl transferase_ N-terminal	Glutathione degradosome_ DUG2	NAD-binding site
Gamma tubulin	Beta-N-acetylhexosaminidase-like	NADH:flavin oxidoreductase/NADH oxidase
Gamma-glutamyltranspeptidase	Cleft lip and palate transmembrane 1	Nitrite and sulfite reductase iron-sulfur/siroheme-binding site
GAT	Uracil-DNA glycosylase_ not poxvirus	Nitrite/sulfite reductase, hemoprotein beta-component, ferrodoxin-like
GCN5-related N-acetyltransferase	Uracil-DNA glycosylase	Nitrogenase component 1 alpha and beta subunits
General substrate transporter	Zinc finger_ HIT-type	Nitrogen-fixing NifU-like, N-terminal
GHMP kinase	Ribosomal protein L30_ bacterial-type	NPL4, putative zinc binding
Glucose/ribitol dehydrogenase	D-arabinono-1_4-lactone oxidase	Nsp1-like, C-terminal
Glucose-inhibited division protein A	Translation elongation factor EF1B_ beta and delta chains_ guanine nucleotide exchange	Nuclear protein G9a
Glucose-inhibited division protein A subfamily	Translation elongation factor EF1B_ beta/delta chains_ conserved site	Nuclear protein SET
Glucose-methanol-choline oxidoreductase	U2 auxiliary factor small subunit	Nucleic acid-binding OB-fold
Glutamate-cysteine ligase catalytic subunit	Transcription factor Tfb4	NUDIX hydrolase
Glutamine amidotransferase_ class-II	ARP23 complex 20 kDa subunit	NULL
Glutamine synthetase_ catalytic region	Dihydroxyacetone kinase	OB-fold nucleic acid binding
Glutathione S-transferase_ C-terminal	CHD5-like protein	Orotidine 5'-phosphate decarboxylase
Glutathione S-transferase_ N-terminal	Preprotein translocase Sec_ Sec61-beta subunit	p38 MAP kinase
Glycine cleavage system P-protein	Preprotein translocase Sec_ Sec61-beta subunit_ eukarya	PAP/25A core
Glycolipid anchored surface protein GAS1	ATPase_ F0 complex_ subunit G_ mitochondrial	PEBP
Glycoside hydrolase_ chitinase active site	RNA polymerase Rbp10	Pectinesterase
Glycoside hydrolase_ clan GH-D	Endoplasmic reticulum_ targeting sequence	Peptidase M28
Glycoside hydrolase_ family 1	Integrase_ Lamba-type_ N-terminal	Peptidase A1, pepsin
Glycoside hydrolase_ family 10	Splicing factor 3B subunit 5/RDS3 complex subunit 10	Peptidase A22B, minor histocompatibility antigen H13
Glycoside hydrolase_ family 12	Splicing factor 3B_ subunit 5	Peptidase M17, cytosol aminopeptidase, C-terminal
Glycoside hydrolase_ family 13_ N-terminal	mRNA (guanine-N(7))-methyltransferase	Peptidase M22, O-sialoglycoprotein
Glycoside hydrolase_ family 15	Vps54-like	Peptidase M24
Glycoside hydrolase_ family 16	SRP40_ C-terminal	Peptidase M24B, X-Pro dipeptidase
Glycoside hydrolase_ family 16_ active site	Histidine acid phosphatase_ eukaryotic	Peptidase S16, lon protease
Glycoside hydrolase_ family 20	Lipoyltransferase and lipoate-protein ligase	Peptidase S24, S26A and S26B
Glycoside hydrolase_ family 27	tRNAHis guanylyltransferase_ eukarya	Peptidase S26, signal peptidase I
Glycoside hydrolase_ family 28	Nucleoporin_ Nup85-like	Peptidase S49
Glycoside hydrolase_ family 3_ C-terminal	Inositolphosphorylceramide-B hydroxylase	Peptidase S9A, prolyl oligopeptidase, N-terminal beta-propeller
Glycoside hydrolase_ family 3_ N-terminal	Protein of unknown function DUF1715_ eukaryotic	Peptidase, eukaryotic cysteine peptidase active site
Glycoside hydrolase_ family 31	Diphthamide synthesis_ DHP2	Peptidyl-prolyl cis-trans isomerase, cyclophilin type
Glycoside hydrolase_ family 35	Tyrosine tRNA ligase_ archaeal/eukaryotic	Peptidylprolyl isomerase, FKBP-type
Glycoside hydrolase_ family 37	MTCP1	Peroxisomal membrane anchor protein (Pex14p)
Glycoside hydrolase_ family 47	Ribosomal protein S2_ eukaryotic/archaeal	Phosphatidylethanolamine-binding protein
Glycoside hydrolase_ family 5	NAD+ synthase	Phosphatidylinositol-4-phosphate 5-kinase
Glycoside hydrolase_ family 61	Zinc finger_ Mcm10/DnaG-type	Phosphatidylinositol-specific phospholipase C, X region
Glycoside hydrolase_ family 63	DNA repair protein Sae2	Phospho-2-dehydro-3-deoxyheptonate aldolase, subtype 1
Glycoside hydrolase_ family 71	DNA-directed RNA polymerase Rpb11_ 13-16 kDa subunit_ conserved site	Phosphoesterase PHP, N-terminal
Glycoside hydrolase_ family 85	Breast carcinoma amplified sequence 2	Phosphoesterase, PA-phosphatase related
Glycosyl hydrolase_ family 88	Phosphoprotein phosphatase PPZ	Phosphoglucomutase/phosphomannomutase
Glycosyl transferase_ family 2	mRNA capping enzyme	Phosphomevalonate kinase Erg8
Glycosyl transferase_ family 8	mRNA capping enzyme_ C-terminal	PKN/rhophilin/rhotekin rho-binding repeat
Glycosyl transferase_ group 1	Diaphanous FH3	PpiC-type peptidyl-prolyl cis-trans isomerase
Golgi phosphoprotein 3	Diaphanous GTPase-binding	PPR repeat
GPI transamidase subunit PIG-U	GTPase-binding/formin homology 3	Prefoldin-related KE2 protein
Gpi16 subunit_ GPI transamidase component	RNA polymerases_ N/8 Kd subunits	Pre-mRNA splicing protein
GPR1/FUN34/yaaH	Ribosomal protein S28e	Proteasome alpha-subunit
GRAM	D-tyrosyl-tRNA(Tyr) deacylase	Protein kinase
GroES-related	Prephenate dehydrogenase_ fungal	Protein of unknown function
GTP cyclohydrolase I	STAT transcription factor_ coiled coil	Protein of unknown function DUF213
GTP1/OBG	Signal recognition particle_ SRP54 subunit	Protein of unknown function DUF392
GTP1/OBG subdomain	Cytochrome C oxidase copper chaperone	Protein of unknown function DUF549
GTP-binding	Zinc finger_ NF-X1-type	Protein of unknown function DUF589
GTP-binding protein LepA	Muskelin_ N-terminal	Protein of unknown function DUF691
GTP-binding protein SAR1	Phosphoribosylformimino-5-aminoimidazole carboxamide ribotide isomerase_ eukaryotic	Protein of unknown function DUF71
GTP-binding protein_ HSR1-related	Sporulation/nuclear morphology_ Spo7	Protein of unknown function DUF92
Gtr1/RagA G protein	Synaptobrevin_ metazoa/fungi	Protein of unknown function RIO1
Guanine nucleotide binding protein (G-protein)_ alpha subunit	Polyubiquitin-tagged protein recognition complex_ Npl4 component	Protein of unknown function UPF0001
Guanine nucleotide exchange factor for Ras-like GTPases_ N-terminal	Ribosomal protein L32p	Protein of unknown function UPF0012
Guanine-nucleotide dissociation stimulator CDC25	Ribosome biogenesis factor_ NIP7	Protein of unknown function UPF0029
GYF	Nucleolar RNA-binding protein Nop10p	Protein of unknown function UPF0031
H+ transporting ATPase_ proton pump	ATG2_ C-terminal	Protein of unknown function UPF0108
HAD-superfamily hydrolase_ subfamily IA_ variant 2	Nucleolar complex-associated protein 3	Protein of unknown function UPF0113
Haem peroxidase_ plant/fungal/bacterial	Citrate lyase_ beta subunit	Protein of unknown function UPF0123
Haloacid dehalogenase-like hydrolase	Streptomyces cyclase/dehydrase	Protein phosphatase 2C
Ham1-like protein	tRNA pseudouridine synthase D_ eukaryotic	Protein phosphatase 2C-like
HEAT	Platelet-activating factor acetylhydrolase_ plasma/intracellular isoform II	Protein tyrosine phosphatase, catalytic region
Heat shock factor (HSF)-type_ DNA-binding	PP-loop ATPase_ YdaO-related	Protein tyrosine phosphatase-like protein, PTPLA
Heat shock protein DnaJ	TFIIH p62 subunit_ N-terminal	Protoheme IX farnesyltransferase
Heat shock protein DnaJ_ N-terminal	Zinc finger_ Zim17-type	P-type trefoil
Heat shock protein Hsp20	UNC-50	Pumilio/Puf RNA-binding
Heat shock protein Hsp90	NADH-ubiquinone oxidoreductase B12 subunit	Putative zinc finger, C2HC5-type
Heavy metal translocating P-type ATPase	NADH dehydrogenase [ubiquinone] (complex I)_ alpha subcomplex_ subunit 2	Pyridoxal-5'-phosphate-dependent enzyme, beta subunit
Heavy metal transport/detoxification protein	YL1 nuclear	Pyridoxal-dependent decarboxylase
HEC/Ndc80p	Ribosomal protein L49/IMG2	Pyridoxamine 5'-phosphate oxidase-related
Helicase-associated region	Kinetochore-Ndc80 subunit Spc24	Pyrokinin
Helix-hairpin-helix motif	EGF	Pyruvate decarboxylase
Helix-turn-helix_ AraC type	Furin-like repeat	RA
Hemopexin	EGF-like_ type 3	RanBP1
Hexokinase	EGF-like_ laminin	RasGAP
HhH-GPD	Growth factor_ receptor	RecA bacterial DNA recombination protein
High mobility group-like nuclear protein	SDA1	Replication factor C conserved region
Histidine acid phosphatase	Region of unknown function_ nucleolar NUC130/133_ N-terminal	Response regulator receiver
Histidinol phosphate phosphatase_ HisJ	Cystathionine beta-lyase_ eukaryotic	Rhodopsin-like GPCR superfamily
Histone acetyltransferase ELP3	Protein of unknown function DUF1183	Rhomboid-like protein
Histone core	tRNA guanosine-2'-O-methyltransferase_ TRM11	Ribonuclease II
Histone deacetylase	Abortive infection protein	Ribonuclease P-related protein
Histone deacetylase superfamily	Uncharacterised conserved protein UCP019307_ cupin region	Ribosomal L18ae protein
Histone H2A	Chalcone isomerase-like	Ribosomal L23 protein
Histone H4	NADH dehydrogenase (ubiquinone)_ 30 kDa subunit	Ribosomal L28e protein
Hly-III related proteins	NADH (or F420H2) dehydrogenase_ subunit C	Ribosomal L32p protein
HMG-I and HMG-Y_ DNA-binding	Ketopantoate reductase ApbA/PanE	Ribosomal L37ae protein
Homeobox	FCP1-like phosphatase_ phosphatase domain	Ribosomal L38e protein
HpcH/HpaI aldolase	SKIP/SNW	Ribosomal protein HS6
HSA	SIT4 phosphatase-associated protein	Ribosomal protein L10E
Hydantoinase B/oxoprolinase	Replication protein A_ subunit RPA32	Ribosomal protein L11, bacterial
Hydroxyethylthiazole kinase	Kynureninase	Ribosomal protein L13, archea and eukaryotic form
Hypoxia induced protein conserved region	AP endonuclease_ family 1	Ribosomal protein L13, bacterial and organelle form
Importin-beta_ N-terminal	Cdc37_ N-terminal	Ribosomal protein L15, bacterial form
Indoleamine 2_3-dioxygenase	Cdc37_ C-terminal	Ribosomal protein L18P/L5E
Initiation factor 2B alpha/beta/delta	Cdc37_ Hsp90 binding	Ribosomal protein L19e
Inorganic pyrophosphatase	Ribosomal protein L35	Ribosomal protein L22/L17, eukaryotic and archaeal form
Inosine/uridine-preferring nucleoside hydrolase	B3/B4 tRNA-binding domain	Ribosomal protein L23, N-terminal
Inositol monophosphatase	tRNA synthetase_ B5	Ribosomal protein L24E
Inositol polyphosphate kinase	Phenylalanyl-tRNA synthetase_ class IIc_ beta subunit_ archae/euk cytosolic	Ribosomal protein L30
IQ calmodulin-binding region	NADH:ubiquinone oxidoreductase 17.2 kD subunit	Ribosomal protein L30, bacterial
Iron permease FTR1	mRNA splicing factor_ Cwf21	Ribosomal protein L44E
Isocitrate lyase and phosphorylmutase	Erg28-like	Ribosomal protein L7, eukaryotic form
Isocitrate/isopropylmalate dehydrogenase	Sodium/sulphate symporter	Ribosomal protein L7/L12
Isopenicillin N synthase	Ubiquinol-cytochrome C reductase hinge	Ribosomal protein L7AE
Isoprenylcysteine carboxyl methyltransferase	Protein of unknown function DUF580	Ribosomal protein S10, eukaryotic and archaeal form
Isy1-like splicing	U6 snRNA-associated Sm-like protein LSm2	Ribosomal protein S12, bacterial and chloroplast form
Ketopantoate hydroxymethyltransferase	Dynein light chain_ type 1 and 2	Ribosomal protein S12E
Kinesin_ motor region	Iron-sulphur-dependent L-serine dehydratase single chain form	Ribosomal protein S15, eukaryotic and archaeal form
KOW	DNA glycosylase/AP lyase and isoleucyl tRNA synthetase_ zinc finger domain	Ribosomal protein S2, eukaryotic and archaeal form
Legume lectin_ beta domain	Transcription factor IIA_ alpha/beta subunit	Ribosomal protein S23, eukaryotic and archaeal form
Leucine-rich repeat	Eukaryotic transcription factor_ Skn-1-like_ DNA-binding	Ribosomal protein S26E
Leucine-rich repeat_ cysteine-containing subtype	UV excision repair protein Rad23_ C-terminal	Ribosomal protein S27E
Leucine-rich repeat_ typical subtype	UV excision repair protein Rad23	Ribosomal protein S4/9, eukaryotic and archaeal form
Lipase_ active site	Vacuolar sorting protein 9_ subgroup	Ribosomal protein S5
Lipase_ class 3	Zinc finger_ CHY-type	Ribosomal protein S5, eukaryotic and archaeal form
Lipoate-protein ligase B	Glycoside hydrolase_ family 17	Ribosomal protein S7, eukaryotic and archaeal form
L-lactate/malate dehydrogenase	Rgp1	Ribosomal protein S7E
Lumazine-binding protein	RIO2 kinase_ winged helix_ N-terminal	Ribosomal protein S8E
Lupus La protein	Ribonuclease/ribotoxin	RNA binding S1
Lysophospholipase_ catalytic region	Protein of unknown function DUF1337	RNA dependent RNA polymerase
MAGE protein	Ribosomal protein L37ae	RNA polymerase II, RPB4
Major facilitator superfamily	Protein of unknown function DUF1909	RNA polymerase Rpb4
Major intrinsic protein	Secretory pathway Sec39	RNA polymerase, dimerisation
Mak16 protein	Glycoside hydrolase_ family 9	RNA polymerase, insert
Malic oxidoreductase	Uncharacterised conserved protein UCP014753	RNA polymerase, RpoA/D/Rpb3-type
Mandelate racemase/muconate lactonizing enzyme	DJ-1	RNA-binding protein Lupus Lal
Manganese and iron superoxide dismutase	Predicted phosphoesterase_ C1039.02 type	RNA-binding region RNP-1 (RNA recognition motif)
Mannose-6-phosphate isomerase_ type I		RRNA 16S rRNA dimethylase
MCM	R.placenta|W.cocos|C. puteana|S.lacrymans|H.pinastri	S25 ribosomal protein
MCM protein 4	Calcium/proton exchanger	SAC3/GANP
MCM protein 7	CENP-B protein	Saccharomyces cerevisiae 175.8kDa hypothetical protein
Metal-dependent phosphohydrolase_ HD region	Density-regulated protein DRP1	SAM (and some other nucleotide) binding motif
Metallophosphoesterase	Dystroglycan-type cadherin-like	Sel1-like repeat
Methionine synthase_ vitamin-B12 independent	Glutathione-dependent formaldehyde-activating_ GFA	SET-related region
Methionyl-tRNA synthetase_ class Ia	G-protein_ gamma subunit	SH3
Mg2+ transporter protein_ CorA-like	Guanine-specific ribonuclease N1 and T1	She9_MDM33
Micro-fibrillar-associated 1_ C-terminal	HAT dimerisation	Shugoshin, C terminal
Mis12	Heterokaryon incompatibility Het-C	Shugoshin, N terminal
Mitochondrial carrier protein	Las1-like	Signal recognition particle 9 kDa
Mitochondrial import inner membrane translocase_ subunit Tim17/22	Macrophage migration inhibitory factor	Silent information regulator protein Sir2
Mitochondrial import translocase_ subunit Tom22	Nucleolar complex-associated	Single-strand binding protein/Primosomal replication protein n
Mitochondrial substrate carrier	Peptidase A22_ presenilin signal peptide	SLT
Mob1/phocein	Peptidyl-tRNA hydrolase	Small GTP-binding protein domain
Molybdopterin biosynthesis MoaE	Protein of unknown function DUF1242	Small nuclear ribonucleoprotein (Sm protein)
Monooxygenase_ FAD-binding	Protein of unknown function DUF396	SMC protein, N-terminal
Mov34/MPN/PAD-1	Protein of unknown function DUF543	Smg-4/UPF3
Mov34-1	Putative Ig	snRNP
Mpv17/PMP22	Retrotransposon gag protein	Sugar transporter superfamily
MT-A70	Ribosomal protein L18e	Sulfate transporter/antisigma-factor antagonist STAS
Multi antimicrobial extrusion protein MatE	Ribosomal protein L34	Survival protein SurE
Multicopper oxidase_ copper-binding site	Ribosomal protein L37e	SWIM Zn-finger
Multicopper oxidase_ type 1	Ricin B lectin	Syntaxin/epimorphin family
Myb_ DNA-binding	Sec34-like protein	TatD-related deoxyribonuclease
Na+ dependent nucleoside transporter	Threonine dehydratase I	TBP-interacting 120
Na+/solute symporter	Threonine dehydratase_ C-terminal	Tetracycline resistance protein
NACHT nucleoside triphosphatase	Universal stress protein (Usp)	Tetracycline resistance protein TetB
NADH:cytochrome b5 reductase (CBR)		Thiamine pyrophosphokinase
NAF1	H.pinastri|F.radiculos	Thioredoxin domain 2
Nascent polypeptide-associated complex NAC	Uncharacterised conserved protein UCP033271	Thymidylate synthase
Natural resistance-associated macrophage protein	Protein of unknown function DUF889_ eukaryote	TonB box, N-terminal
Neutral trehalase Ca2+ binding	Phosphoesterase_ RecJ-like	TPR repeat
Neutrophil cytosol factor 2	Purple acid phosphatase-like_ N-terminal	Transcription factor jumonji, jmjC
Nitrilase/cyanide hydratase and apolipoprotein N-acyltransferase	Fructosamine kinase	Transcription factor Jun
Nitrite and sulphite reductase 4Fe-4S region	Magnesium-translocating P-type ATPase	Transcription factors TFIIS, elongin A, CRSP70, conserved
NLI interacting factor	Outer membrane chaperone Skp (OmpH)	Transketolase, C terminal
Nonaspanin (TM9SF)	Peptidase M19_ renal dipeptidase_ active site	Transketolase, N terminal
NPL4	Aegerolysin	Translation factor
Nrap protein	Carbohydrate binding family 6	Translation initiation factor IF5
Nuclear transport factor 2	Region of unknown function DUF1741	tRNA (uracil-5-)-methyltransferase/TrmA
Nucleoside phosphatase GDA1/CD39		tRNA intron endonuclease, catalytic C-terminal
Nucleotide binding protein_ PINc	S.lacrymans|F.radiculos	tRNA -methyltransferase
Octicosapeptide/Phox/Bem1p	tRNA ligase_ phosphodiesterase_ fungi	tRNA synthetase, class II (D, K and N)
Oligopeptide transporter OPT superfamily	Supt5 repeat	tRNA synthetases, class-II (G, H, P and S)
Oligosaccharyl transferase_ STT3 subunit	Imidazole glycerol phosphate synthase HisHF	Tropomyosin
O-methyltransferase_ family 2	DNA repair protein RadA	Tumor suppressor protein, von Hippel-Lindau disease
Opsin		Type III restriction enzyme, res subunit
OsmC-like protein	S.lacrymans|H.pinastri|F.radiculos	Tyrosine specific protein phosphatase
Oxidoreductase FAD/NAD(P)-binding	Polysaccharide lyase family 8-like_ C-terminal	Tyrosine specific protein phosphatase and dual specificity protein phosphatase
Oxidoreductase FAD-binding region	BFD-like [2Fe-2S]-binding region	Ubiquitin-associated
Oxidoreductase_ C-terminal	Ribosome biogenesis factor NIP7-like	Ubiquitin-conjugating enzymes
Oxidoreductase_ molybdopterin binding	Yeast cell wall synthesis KRE9KNH1	Urease
Oxidoreductase_ N-terminal	Rad51_ C-terminal	Urease, gamma subunit
Paired amphipathic helix		Uroporphyrin-III C/tetrapyrrole (Corrin/Porphyrin) methyltransferase
PAK-box/P21-Rho-binding	C. puteana|F.radiculos	Utp11
PAP/25A-associated	ABC transporter_ ABCE	Utp21 specific WD40-associated
PAPA-1-like conserved region	YD repeat	Vacuolar H+-transporting two-sector ATPase, C subunit
Parallel beta-helix repeat	Curculin-like (mannose-binding) lectin	Vacuolar H+-transporting two-sector ATPase, C subunit eukaryotic
Parvalbumin	Holo-[acyl carrier protein] synthase	Vasopressin V2 receptor
PAS	Helix-hairpin-helix DNA-binding_ class 1	Vinculin
Pentulose kinase	Retroviral matrix_ N-terminal	WH1
Pep3/Vps18/deep orange	Nop17p	Yeast 73.5kDa hypothetical-related protein
Peptidase aspartic_ active site	Malate/L-lactate dehydrogenase	Zinc transporter ZIP
Peptidase C12_ ubiquitin carboxyl-terminal hydrolase 1	Proteinase inhibitor I14/I15_ hirudin/antistatin	Zinc-containing alcohol dehydrogenase
Peptidase C19_ ubiquitin carboxyl-terminal hydrolase 2		Zinc-containing alcohol dehydrogenase superfamily
Peptidase C2_ calpain	C. puteana|H.pinastri|F.radiculos	ZIP zinc/iron transport
Peptidase C48_ SUMO/Sentrin/Ubl1	Rho termination factor_ N-terminal	Zn-binding protein, LIM
Peptidase M_ neutral zinc metallopeptidases_ zinc-binding site	SM22/calponin	Zn-finger (putative), N-recognin
Peptidase M14_ carboxypeptidase A	ATPase_ F0 complex_ subunit C	Zn-finger in ubiquitin thiolesterase
Peptidase M20		Zn-finger Rad18
Peptidase M22_ glycoprotease	C. puteana|S.lacrymans|F.radiculos	Zn-finger, C2H2 matrin type
Peptidase M24_ methionine aminopeptidase	Protein of unknown function GLTT	Zn-finger, C2H2 type
Peptidase M24A_ methionine aminopeptidase_ subfamily 1	Transposase_ Tc1/Tc3	Zn-finger, C5HC2 type
Peptidase M3A and M3B_ thimet/oligopeptidase F	Hemerythrin/HHE cation-binding motif	Zn-finger, CCHC type
Peptidase S10_ serine carboxypeptidase	DEATH-like	Zn-finger, C-x8-C-x5-C-x3-H type
Peptidase S14_ ClpP	Somatotropin hormone	Zn-finger, cysteine-rich C6HC
Peptidase S16_ active site	Photosynthetic reaction centre_ L and M subunits	Zn-finger, FYVE type
Peptidase S16_ ATP-dependent protease La	Beta-lactamase_ class A	Zn-finger, GATA type
Peptidase S16_ lon C-terminal		Zn-finger, modified RING
Peptidase S26A_ signal peptidase I	C. puteana|S.lacrymans|H.pinastri|F.radiculos	Zn-finger, MYND type
Peptidase S26B_ eukaryotic signal peptidase	Protease inhibitor I4_ serpin	Zn-finger, NAD(+) ADP-ribosyltransferase
Peptidase S28	Kinetochore Spc7	Zn-finger, NF-X1 type
Peptidase S33_ prolyl aminopeptidase	DNA replication factor Dna2	Zn-finger, Ran-binding
Peptidase S33_ tricorn interacting factor 1	Glycoside hydrolase_ family 43	Zn-finger, RING
Peptidase S8 and S53_ subtilisin_ kexin_ sedolisin	Protein of unknown function DUF914_ eukaryotic	Zn-finger, Tim10/DDP type
Peptidase S9_ prolyl oligopeptidase active site region	Protein of unknown function DUF829_ eukaryotic	Zn-finger, U1-like
Peptidase S9_ serine active site	HAD superfamily hydrolase-like_ type 3	Zn-finger, ZPR1 type
Peptidase S9B_ dipeptidylpeptidase IV N-terminal	Cellulose-binding region_ fungal	Zn-finger, ZZ type
Peptidase T1A_ proteasome beta-subunit	Transcriptional coactivator/pterin dehydratase	Zn-finger-like, PHD finger
Peptidase T2_ asparaginase 2	Proteasome maturation factor UMP1
Periodic tryptophan protein-associated region	Arginyl tRNA synthetase_ class Ic_ N-terminal
Permease for cytosine/purines_ uracil_ thiamine_ allantoin	LamB/YcsF
Pescadillo_ N-terminal	I/LWEQ
Phenylalanyl-tRNA synthetase_ class IIc	HPP
Pheromone B alpha-1 receptor	Transcription elongation factor Spt5
Phosphatidate cytidylyltransferase	BRCA1-associated 2
Phosphatidylserine decarboxylase-related	Outer membrane protein_ MIM1/TOM13_ mitochondrial
Phosphoglucose isomerase (PGI)	Vacuolar protein sorting-associated protein 41
Phosphoglycerate kinase	Phenazine biosynthesis PhzC/PhzF protein
Phosphoglycerate/bisphosphoglycerate mutase	Peptidase M50
Phospholipase D/Transphosphatidylase	Cation-independent mannose-6-phosphate receptor
Phospholipid methyltransferase	Fungal mating-type pheromone
Phospholipid/glycerol acyltransferase	Endoplasmic reticulum_ protein Pkr1
Phospholipid-translocating P-type ATPase_ flippase	2 _ 3 cyclic phosphodiesterase_ plant
Phosphopantetheine attachment site	7_8-dihydro-8-oxoguanine triphosphatase
Phosphopantetheine-binding
Phosphoribosylaminoimidazole carboxylase_ ATPase subunit	H.pinastri|F.radiculos
Phosphoribosylformylglycinamidine cyclo-ligase	Uncharacterised conserved protein UCP033271
Phosphoribosylformylglycinamidine synthase_ eukaryotes and proteobacteria	Protein of unknown function DUF889_ eukaryote
Phosphoribosylglycinamide formyltransferase	Phosphoesterase_ RecJ-like
Phosphoribosylglycinamide synthetase	Purple acid phosphatase-like_ N-terminal
Phosphotransferase KptA/Tpt1	Fructosamine kinase
Phosphotyrosyl phosphatase activator_ PTPA	Magnesium-translocating P-type ATPase
Phox-like	Outer membrane chaperone Skp (OmpH)
Plasma-membrane proton-efflux P-type ATPase	Peptidase M19_ renal dipeptidase_ active site
Pleckstrin/ G-protein_ interacting region	Aegerolysin
Pleckstrin-like	Carbohydrate binding family 6
Plectin/S10_ N-terminal	Region of unknown function DUF1741
Poly(A) polymerase_ central region
Poly(A) polymerase_ RNA-binding region	S.lacrymans|F.radiculos
Poly(ADP-ribose) polymerase_ catalytic region	tRNA ligase_ phosphodiesterase_ fungi
Poly(ADP-ribose) polymerase_ regulatory region	Supt5 repeat
Polyprenyl synthetase	Imidazole glycerol phosphate synthase HisHF
Polysaccharide deacetylase	DNA repair protein RadA
Possible metal-binding region in RNase L inhibitor_ RLI
Prenyltransferase/squalene oxidase	S.lacrymans|H.pinastri|F.radiculos
Prohibitin	Polysaccharide lyase family 8-like_ C-terminal
Protease-associated PA	BFD-like [2Fe-2S]-binding region
Proteasome component region PCI	Ribosome biogenesis factor NIP7-like
Protein kinase C_ phorbol ester/diacylglycerol binding	Yeast cell wall synthesis KRE9KNH1
Protein kinase_ C-terminal	Rad51_ C-terminal
Protein of unknown function DUF1077
Protein of unknown function DUF1115	C. puteana|F.radiculos
Protein of unknown function DUF1212	ABC transporter_ ABCE
Protein of unknown function DUF1264	YD repeat
Protein of unknown function DUF1479	Curculin-like (mannose-binding) lectin
Protein of unknown function DUF185	Holo-[acyl carrier protein] synthase
Protein of unknown function DUF221	Helix-hairpin-helix DNA-binding_ class 1
Protein of unknown function DUF28	Retroviral matrix_ N-terminal
Protein of unknown function DUF283	Nop17p
Protein of unknown function DUF343	Malate/L-lactate dehydrogenase
Protein of unknown function DUF367	Proteinase inhibitor I14/I15_ hirudin/antistatin
Protein of unknown function DUF382
Protein of unknown function DUF383	C. puteana|H.pinastri|F.radiculos
Protein of unknown function DUF384	Rho termination factor_ N-terminal
Protein of unknown function DUF537	SM22/calponin
Protein of unknown function DUF544	ATPase_ F0 complex_ subunit C
Protein of unknown function DUF572
Protein of unknown function DUF59	C. puteana|S.lacrymans|F.radiculos
Protein of unknown function DUF590	Protein of unknown function GLTT
Protein of unknown function DUF602	Transposase_ Tc1/Tc3
Protein of unknown function DUF605	Hemerythrin/HHE cation-binding motif
Protein of unknown function DUF726	DEATH-like
Protein of unknown function DUF788	Somatotropin hormone
Protein of unknown function DUF803	Photosynthetic reaction centre_ L and M subunits
Protein of unknown function DUF926	Beta-lactamase_ class A
Protein of unknown function DUF941
Protein of unknown function DUF974	C. puteana|S.lacrymans|H.pinastri|F.radiculos
Protein of unknown function Met10	Protease inhibitor I4_ serpin
Protein of unknown function UPF0025	Kinetochore Spc7
Protein of unknown function UPF0041	DNA replication factor Dna2
Protein of unknown function UPF0057	Glycoside hydrolase_ family 43
Protein of unknown function UPF0220	Protein of unknown function DUF914_ eukaryotic
Protein prenyltransferase_ alpha subunit	Protein of unknown function DUF829_ eukaryotic
Protein secE/sec61-gamma protein	HAD superfamily hydrolase-like_ type 3
Protein synthesis factor_ GTP-binding	Cellulose-binding region_ fungal
PRP1 splicing factor_ N-terminal	Transcriptional coactivator/pterin dehydratase
Pseudouridine synthase	Proteasome maturation factor UMP1
Pseudouridine synthase_ RluD	Arginyl tRNA synthetase_ class Ic_ N-terminal
PSP_ proline-rich	LamB/YcsF
P-type ATPase of unknown pump specificity (type V)	I/LWEQ
PUA	HPP
Purine phosphorylase_ family 2	Transcription elongation factor Spt5
Putative phosphatase regulatory subunit	BRCA1-associated 2
PWWP	Outer membrane protein_ MIM1/TOM13_ mitochondrial
Pyridine nucleotide-disulphide oxidoreductase_ class I	Vacuolar protein sorting-associated protein 41
Pyridine nucleotide-disulphide oxidoreductase_ class-II	Phenazine biosynthesis PhzC/PhzF protein
Pyridoxamine 5'-phosphate oxidase	Peptidase M50
Radical SAM	Cation-independent mannose-6-phosphate receptor
Rare lipoprotein A	Fungal mating-type pheromone
Ras GTPase	Endoplasmic reticulum_ protein Pkr1
Ras GTPase-activating protein	2 _ 3 cyclic phosphodiesterase_ plant
Ras small GTPase_ Rab type	7_8-dihydro-8-oxoguanine triphosphatase
Ras small GTPase_ Ras type
Ras small GTPase_ Rho type	W.cocos|F.radiculos
Recoverin	Alanine dehydrogenase/pyridine nucleotide transhydrogenase_ conserved site-1
Regulation of nuclear pre-mRNA protein	Glycerol dehydrogenase
Regulator of chromosome condensation_ RCC1	Cyanamide hydratase_ HD-type
Repair protein Rad1/Rec1	Protein of unknown function DUF1348
Rhodanese-like	NADPH-dependent FMN reductase
RhoGAP	Zinc finger_ H2C2-type_ histone UAS binding
Ribonuclease CAF1	(2R)-phospho-3-sulpholactate synthase_ ComA
Ribonuclease III	Alkaline phytoceramidase
Ribosomal protein 60S	Ferroportin1
Ribosomal protein L1	Protein of unknown function UPF0067_ conserved site
Ribosomal protein L10	Peptidase S41
Ribosomal protein L11	Protein of unknown function DUF985
Ribosomal protein L13	Alkaline phosphatase
Ribosomal protein L13e	5'-3' exoribonuclease 2
Ribosomal protein L14	Protein phosphatase 5
Ribosomal protein L14b/L23e	Protein of unknown function DUF255
Ribosomal protein L15	Nitroreductase
Ribosomal protein L15e	Biotin--acetyl-CoA-carboxylase ligase
Ribosomal protein L16	Nucleoside phosphorylase
Ribosomal protein L17	Resolvase_ N-terminal
Ribosomal protein L2	Protein of unknown function DUF302
Ribosomal protein L21e	Protein of unknown function UPF0121
Ribosomal protein L22/L17	Molybdenum cofactor sulphurase_ C-terminal
Ribosomal protein L27e	Flavodoxin_ conserved site
Ribosomal protein L28	Prokaryotic N-terminal methylation site
Ribosomal protein L29	Uracil phosphoribosyl transferase
Ribosomal protein L3	COQ9
Ribosomal protein L30e	Protein of unknown function DUF124
Ribosomal protein L31e	Tryptophan RNA-binding attenuator protein-like
Ribosomal protein L32e	Protein of unknown function DUF1857
Ribosomal protein L35Ae	Recombination protein Rad52
Ribosomal protein L39e	Midasin
Ribosomal protein L4/L1e	Conserved hypothetical protein CHP02231
Ribosomal protein L5	Lipoprotein_ type 6
Ribosomal protein L6	Protein of unknown function UPF0089
Ribosomal protein L6E	UDP-glucuronosyl/UDP-glucosyltransferase
Ribosomal protein L7A
Ribosomal protein L7Ae/L30e/S12e/Gadd45	W.cocos|H.pinastri|F.radiculos
Ribosomal protein S10	Plasmid pRiA4b ORF-3-like
Ribosomal protein S11	JNK MAP kinase
Ribosomal protein S12/S23	Region of unknown function DUF1965
Ribosomal protein S13	RNA-directed DNA polymerase (reverse transcriptase)
Ribosomal protein S13-like_ H2TH	Ubiquitin-related modifier 1
Ribosomal protein S14	Protein of unknown function DUF952
Ribosomal protein S15	Serine/threonine phosphatase_ PPP5
Ribosomal protein S16	Programmed cell death protein 2_ C-terminal
Ribosomal protein S17	Beta-lactamase_ class B_ conserved site
Ribosomal protein S18	DASH complex_ subunit Duo1
Ribosomal protein S19/S15
Ribosomal protein S19e	W.cocos|S.lacrymans|F.radiculos
Ribosomal protein S2	Nucleotide sugar epimerase
Ribosomal protein S21e	UMP-CMP kinase
Ribosomal protein S27a	Rap1 Myb
Ribosomal protein S3_ C-terminal	Leghaemoglobin
Ribosomal protein S3Ae	Ubiquitin-associated region 2
Ribosomal protein S4	Thioredoxin-like
Ribosomal protein S5_ C-terminal	Spectrin alpha chain
Ribosomal protein S6	Nrm1
Ribosomal protein S6e	Saposin-like
Ribosomal protein S7	Peptidase S33_ tripeptidyl-peptidase C-terminal
Ribosomal protein S8	High mobility group proteins HMG-I and HMG-Y
Ribosomal protein S9
Ribosomal RNA adenine methylase transferase	W.cocos|S.lacrymans|H.pinastri|F.radiculos
Ribosomal RNA methyltransferase RrmJ/FtsJ	Transcription factor PAP1
Ribosome recycling factor	Lycopene beta and epsilon cyclase
RNA 3'-terminal phosphate cyclase	Leucine-rich repeat 2
RNA polymerase I specific transcription initiation factor RRN3	Pre-SET zinc-binding sub-group
RNA polymerase Rpb1_ domain 7	Glutaredoxin_ eukaryotic and viruses
RNA polymerase Rpb7_ N-terminal	Plastocyanin-like
RNA recognition motif 2	Starch synthase catalytic region
RNA-binding S4	Cecropin
RNA-metabolising metallo-beta-lactamase	XAP5 protein
RPEL repeat	Phosphoadenosine phosphosulphate reductase thioredoxin
RTA1 like protein	Predicted pyridoxal phosphate-dependent enzyme_ YBL036C type
S1/P1 nuclease	Ketol-acid reductoisomerase_ fungi
S1_ IF1 type	Peptidase C15_ pyroglutamyl peptidase I-like
Scavenger mRNA decapping enzyme	Endoplasmic reticulum oxidoreductin 1
Scramblase	Tetratricopeptide repeat 11 Fission 1 protein
Sec1-like protein	Prokaryotic ATPase
Sec20	Thioredoxin
Sec63	DASH complex_ subunit Dad3
SEC7-like	GINS complex_ Psf1 component
SecY protein	Alpha-amylase_ fungi
Serine/threonine dehydratase_ pyridoxal-phosphate-binding site	Queuine tRNA-ribosyltransferase
Serine/threonine protein kinase	ssDNA-binding transcriptional regulator
Serine/threonine protein kinase_ active site	RNA polymerase III Rpc4
Serine/threonine-specific protein phosphatase and bis(5-nucleosyl)-tetraphosphatase	Xylose isomerase-type TIM barrel
Short-chain dehydrogenase/reductase SDR	Multiprotein bridging factor 1_ N-terminal
SHQ1 protein	Prephenate dehydratase
Single-stranded nucleic acid binding R3H	Imidazole glycerol-phosphate dehydratase
Siroheme synthase_ N-terminal	Ribosomal protein L38e
Smr protein/MutS2 C-terminal	Phosphate permease
SNF2-related	Zinc finger_ C2H2_ LYAR-type
SNF5/SMARCB1/INI1	Ubiquitin related modifier 1
Snf7	Plant Basic Secretory Protein
SNO glutamine amidotransferase	Exosome-associated factor Rrp47/DNA strand repair C1D
Sodium/calcium exchanger membrane region	Glutaredoxin 2
Sodium/hydrogen exchanger	Nin one binding (NOB1) Zn-ribbon like
Spc97/Spc98	DASH complex_ subunit Spc19
SPla/RYanodine receptor SPRY	Ubiquinone biosynthesis hydroxylase_ UbiH/UbiF/VisC/COQ6
Splicing factor PWI	Arginine-tRNA-protein transferase_ C-terminal
SPX_ N-terminal	Bromodomain transcription factor
Ssu72-like protein	Carbohydrate-binding WSC_ subgroup
Stem cell self-renewal protein Piwi	Nucleotide excision repair_ TFIIH_ subunit TTDA
SUA5	Chromatin remodelling complex_ RSC SWI/SNF subunit Rsc7/Swp82
Sua5/YciO/YrdC/YwlC	Mss4
SUA5/yciO/yrdC_ N-terminal	RINT-1/TIP-1
Succinyl-CoA ligase_ alpha subunit	Protein of unknown function DUF52
Sugar transporter	RNase P_ subunit Pop3
Sybindin-like protein	OST3/OST6
Synaptojanin_ N-terminal	Ribosomal protein S27_ mitochondrial
Syntaxin_ N-terminal	NAD-dependent deacetylase sirtuin-2_ eukaryota
Tafazzin	DNA polymerase alpha_ subunit B N-terminal
TAFII28-like protein	Protein of unknown function DUF1762
TAP_ C-terminal	Bicoid-interacting 3
Target SNARE coiled-coil region	S100/CaBP-9k-type_ calcium binding
Taurine catabolism dioxygenase TauD/TfdA	Transcription factor Pcc1
TB2/DP1 and HVA22 related protein	Transcription initiation factor IIE_ beta subunit
TEA/ATTS	Region of unknown function DUF1746_ fungi
Terpene synthase_ metal-binding	Modification methylase HemK
Terpenoid synthase	Guanylate kinase
Tetrapeptide transporter_ OPT1/isp4	Guanylate kinase/L-type calcium channel region
TGS	Guanylate kinase_ sub-group
Thiamine monophosphate synthase	Flavin reductase-like_ FMN-binding
ThiJ/PfpI	PHF5-like
Thioesterase	SH3-binding_ glutamic acid-rich protein
Thioesterase superfamily	Glia maturation factor beta
Thiolase	CybS
Thioredoxin-related	CPL
Threonyl-tRNA synthetase_ class IIa	Protein of unknown function DUF1764_ eukaryotic
Timeless protein	Protein of unknown function DUF947
TIP49_ C-terminal	BRCA2_ oligonucleotide/oligosaccharide-binding 1
TOPRIM	BRCA2_ helical
Toprim subdomain	Pre-mRNA cleavage complex II Clp1
Transcription elongation factor S-II_ central region	Proprotein convertase_ P
Transcription factor CBF/NF-Y/archaeal histone	Protein of unknown function DUF858_ methyltransferase-like
Transcription factor jumonji_ JmjN	Lipase_ GDSL_ active site
Transcription factor_ MADS-box	Protein of unknown function DUF1720
Transcription initiation factor TFIID component TAF4	Ribosomal protein L47_ mitochondrial
Transcription initiation factor TFIID_ 23-30 kDa subunit	Aspartate-semialdehyde dehydrogenase
Transketolase_ central region	Aspartate-semialdehyde dehydrogenase_ peptidoglycan lacking
Translation initiation factor IF6	Aspartate-semialdehyde dehydrogenase_ conserved site
Translation initiation factor SUI1	tRNA (guanine-N1-)-methyltransferase
Translation protein SH3-like	Protein of unknown function DUF850_ transmembrane eukaryotic
Translocation protein Sec62	Nucleoporin_ Nsp1-like_ C-terminal
Translocation protein Sec62_ ascomycota	U2A'/phosphoprotein 32 family A_ C-terminal
Transport protein particle (TRAPP) component_ Bet3	Thiamin pyrophosphokinase
tRNA (5-methylaminomethyl-2-thiouridylate)-methyltransferase	mRNA export_ Rsm1-like
tRNA pseudouridine synthase	Ribonuclease P-related
tRNA-binding arm	TFIIH C1-like_ C-terminal
Tubulin	Arsenical-resistance protein ACR3
Tubulin binding cofactor A	Vacuolar (H+)-ATPase G subunit
Tubulin/FtsZ_ C-terminal	Mitochondrial import inner membrane translocase_ subunit Tim44
Tubulin/FtsZ_ GTPase	Chromo shadow
Tudor	HAD-superfamily phosphatase_ subfamily IIIC
TUP1-like enhancer of split	Magnesium-dependent phosphatase-1
Tyrosine protein kinase	Replication factor A protein 3
Tyrosine protein kinase_ active site	RNA polymerase II_ Rpb4
UAS	Exocyst complex component Sec6
UBA/THIF-type NAD/FAD binding fold	Leo1-like protein
UbiA prenyltransferase	YCII-related
UbiE/COQ5 methyltransferase	Graves disease carrier protein
Ubiquitin	Small-subunit processome_ Utp11
Ubiquitin interacting motif	Protein of unknown function DUF71_ ATP-binding region
Ubiquitin system component Cue	ATPase_ V1/A1 complex_ subunit F
UBX	ATPase_ V1 complex_ subunit F_ eukaryotic
UMUC-like DNA-repair protein	Primosome PriB/single-strand DNA-binding
Urease accessory protein UreG	DNA repair Rad51/transcription factor NusA_ alpha-helical
Urease_ alpha subunit	Protein of unknown function DUF953_ thioredoxin-like
Urease_ beta subunit	Cytochrome bd ubiquinol oxidase_ 14 kDa subunit
UspA	Mitochondrial import translocase_ subunit Tom7
UV-endonuclease UvdE	Initiation factor 3
Vacuolar protein sorting-associated protein 26	Polynucleotide phosphorylase_ phosphorolytic RNA-binding_ bacterial/organelle-type
Vacuolar sorting protein 9	Anti-silencing protein_ ASF1-like
Variant SH3
VHS	W.cocos|C. puteana|F.radiculos
Voltage-dependent potassium channel	Acetylornithine deacetylase or succinyl-diaminopimelate desuccinylase
von Willebrand factor_ type A	Glutaredoxin active site
Vps16_ N-terminal	Interferon-inducible GTPase
WGR	Peptidase C14_ ICE_ catalytic subunit p20_ active site
WW/Rsp5/WWP	Extradiol ring-cleavage dioxygenase_ class III enzyme_ subunit B
Xeroderma pigmentosum group D protein	Protein of unknown function DUF783
XPA	Phosphotransferase system_ HPr histidine phosphorylation site
XPG I	Transglutaminase_ C-terminal
XPG N-terminal	Flagellar motor protein MotA_ conserved site
YjgF-like protein	Translation elongation factor EFTs/EF1B
	Protein of unknown function DUF1546
W.cocos|C. puteana|S.lacrymans|H.pinastri|F.radiculos	Sphingomyelin phosphodiesterase
(Uracil-5)-methyltransferase	Cell surface antigen
[NiFe]-hydrogenase/urease maturation factor_ Ni(2+)-binding GTPase	Mitochondrial ATPase inhibitor_ IATP
14-3-3 protein
1-acyl-sn-glycerol-3-phosphate acyltransferase	W.cocos|C. puteana|H.pinastri|F.radiculos
23S ribosomal RNA methyltransferase	Peptidase M50_ mammalian sterol-regulatory element binding protein
26S proteasome regulatory complex_ non-ATPase subcomplex_ Rpn1 subunit	Transcription elongation factor Spt6
26S proteasome regulatory complex_ non-ATPase subcomplex_ Rpn2/Psmd1 subunit	Uncharacterised conserved protein UCP036436_ nucleotide-sugar transporter-related
26S proteasome regulatory subunit_ C-terminal	EGF_ extracellular
2Fe-2S ferredoxin_ iron-sulphur binding site	Cytochrome c oxidase subunit VIIc
2-isopropylmalate synthase LeuA_ allosteric (dimerisation) domain	Reverse transcriptase_ RNA-dependent DNA polymerase
2-methylcitrate dehydratase PrpD	Integrase_ catalytic core
2OG-Fe(II) oxygenase	Phosphoribosylglycinamide formyltransferase_ active site
2-oxoglutarate dehydrogenase_ E1 component	Myosin S1 fragment_ N-terminal
2-phosphoglycolate phosphatase_ eukaryotic	Transcriptional repressor Tup1_ N-terminal
3(2)_5 -bisphosphate nucleotidase HAL2	Hydroxyacylglutathione hydrolase
3_4-Dihydroxy-2-butanone 4-phosphate synthase	PAS fold-2
3'5'-cyclic nucleotide phosphodiesterase	Transport protein Trs120
3-dehydroquinate synthase AroB	Vacuolar protein sorting-associated protein 16
3-dehydroquinate synthase AroB_ subgroup	Rad9
3-hydroxyacyl-CoA dehydrogenase_ NAD binding	Protein of unknown function DUF647
3-hydroxyanthranilic acid dioxygenase	Shugoshin_ N-terminal
3-hydroxyisobutyrate dehydrogenase-related_ conserved site	Protein of unknown function UPF0132
3-isopropylmalate dehydratase_ large subunit region	Senescence marker protein-30 (SMP-30)
3-isopropylmalate dehydratase_ small subunit region	SRR1
3-isopropylmalate dehydrogenase	Actin-binding WH2
3-oxoacid CoA-transferase	3-hydroxyisobutyrate dehydrogenase
3-oxoacid CoA-transferase_ subunit A	Centromere protein B_ DNA-binding region sub-type
3-oxoacid CoA-transferase_ subunit B	Whey acidic protein_ 4-disulphide core
3-phosphoshikimate 1-carboxyvinyltransferase_ core	Acetylornithine and succinylornithine aminotransferase
3-phosphoshikimate 1-carboxyvinyltransferase_ subgroup	Phosphogluconate dehydrogenase_ NAD-binding_ putative_ C-terminal
4Fe-4S ferredoxin_ iron-sulphur binding	C-type lectin fold
4-hydroxybenzoate polyprenyl transferase	Histidine biosynthesis trifunctional-protein
5-AMP-activated protein kinase_ beta subunit_ complex-interacting region	Protein of unknown function DUF917
5-formyltetrahydrofolate cyclo-ligase	Sds3-like
5-methyltetrahydropteroyltriglutamate--homocysteine S-methyltransferase	DASH complex_ subunit Dam1
6_7-dimethyl-8-ribityllumazine synthase
60 kDa inner membrane insertion protein	W.cocos|C. puteana|S.lacrymans|F.radiculos
6-phosphofructo-2-kinase	Casein_ alpha/beta
6-phosphofructokinase_ eukaryotic type	Phenylalanine ammonia-lyase
6-phosphogluconate dehydrogenase	Myosin_ N-terminal_ SH3-like
6-phosphogluconate dehydrogenase_ C-terminal	Pyrokinin_ conserved site
6-phosphogluconate dehydrogenase_ C-terminal-like	Protein of unknown function DUF1168
6-phosphogluconate dehydrogenase_ decarboxylating	ATP-citrate synthase
6-phosphogluconate dehydrogenase_ NAD-binding	Apoptosis inhibitory 5
6-phosphogluconate-binding site	Transferase
6-phosphogluconolactonase	Lysophospholipase patatin_ conserved site
7_8-Dihydro-6-hydroxymethylpterin-pyrophosphokinase_ HPPK	Probable translation factor pelota
8-oxoguanine DNA glycosylase_ N-terminal	N6 adenine-specific DNA methyltransferase_ N12 class
AAA ATPase VAT_ N-terminal	DASH complex_ subunit Spc34
AAA ATPase_ CDC48	MOSC_ N-terminal beta barrel
AAA ATPase_ conserved site	T-complex protein 1_ delta subunit
AAA ATPase_ core	Peptidase S1 and S6_ chymotrypsin/Hap
AAA+ ATPase_ core	Inorganic phosphate transport PHO88
AARP2CN	WD40-like Beta Propeller
ABC transporter_ N-terminal	Neugrin
ABC transporter_ transmembrane region_ type 1	Rubisco LSMT substrate-binding
ABC transporter-like	RuBisCO-cytochrome methylase_ RMS1
ABC-1	Uso1/p115 like vesicle tethering protein_ C-terminal
ABC-2 type transporter	Deoxyribonuclease_ TatD Mg-dependent
AB-hydrolase YheT_ putative	HAD-superfamily hydrolase_ subfamily IA_ variant 1
Acetate--CoA ligase	Cell wall assembly and cell proliferation coordinating protein_ KNR4 type
Acetohydroxy acid isomeroreductase
Acetohydroxy acid isomeroreductase C-terminal	R.placenta|F.radiculos
Acetohydroxy acid isomeroreductase_ catalytic	Arsenical pump membrane protein
Acetolactate synthase_ large subunit_ biosynthetic	Death-on-curing protein
Acetolactate synthase_ small subunit	Lysosome-associated membrane glycoprotein (Lamp)/CD68
Acetyl-CoA carboxylase_ central region
Acetyl-coenzyme A carboxyltransferase_ C-terminal	R.placenta|H.pinastri|F.radiculos
Acetyl-coenzyme A carboxyltransferase_ N-terminal	Dyp-type peroxidase
Acetylglutamate kinase
Acireductone dioxygenase_ ARD	R.placenta|S.lacrymans|H.pinastri|F.radiculos
ACN9	Pheromone A receptor
Aconitase A/isopropylmalate dehydratase small subunit_ swivel
Aconitase/3-isopropylmalate dehydratase large subunit_ alpha/beta/alpha	R.placenta|C. puteana|H.pinastri|F.radiculos
Aconitase/3-isopropylmalate dehydratase_ swivel	Aflatoxin biosynthesis regulatory protein
Aconitase_ mitochondrial-like
Actin interacting protein 3	R.placenta|C. puteana|S.lacrymans|F.radiculos
Actin_ conserved site	Cyanovirin-N
Actin-binding FH2	Glycoside hydrolase_ family 11
Actin-binding FH2 and DRF autoregulatory	Site-specific DNA-methyltransferase (cytosine-N4-specific)
Actin-crosslinking proteins
Actinin-type_ actin-binding_ conserved site	R.placenta|C. puteana|S.lacrymans|H.pinastri|F.radiculos
Activator of Hsp90 ATPase homologue 1-like	Deoxyribonuclease/rho motif-related TRAM
Activator of Hsp90 ATPase_ N-terminal	Helix-turn-helix_ Fis-type
Acyl carrier protein (ACP)	Lariat debranching enzyme_ C-terminal
Acyl carrier protein-like	Phytochrome
Acyl transferase	Protein of unknown function DUF427
Acyl transferase/acyl hydrolase/lysophospholipase
Acyl-CoA dehydrogenase/oxidase C-terminal	R.placenta|W.cocos|F.radiculos
Acyl-CoA dehydrogenase/oxidase_ central region	Acylphosphatase
Acyl-CoA dehydrogenase/oxidase_ middle and N-terminal	Bacterial regulatory protein_ LuxR
Acyl-CoA dehydrogenase_ conserved site	Eggshell protein
Acyl-CoA N-acyltransferase	Fungal lignin peroxidase
Acyl-CoA oxidase	Lipocalin-related protein and Bos/Can/Equ allergen
Acyl-CoA oxidase/dehydrogenase_ type 1	MHYT
Acyl-CoA oxidase_ C-terminal	Peptidase C15_ pyroglutamyl peptidase I
Acyl-CoA-binding protein_ ACBP	Recombination/repair protein Rad50
Acyltransferase ChoActase/COT/CPT	Tannase and feruloyl esterase
Adaptin ear-binding coat-associated protein 1 NECAP-1
Adaptor protein ClpS_ core	R.placenta|W.cocos|S.lacrymans|F.radiculos
Adaptor protein complex AP-1_ gamma subunit	Putative 5-3 exonuclease
Adaptor protein complex AP-2_ alpha subunit
Adaptor protein complex AP-3_ delta subunit	R.placenta|W.cocos|S.lacrymans|H.pinastri|F.radiculos
Adaptor protein complex_ beta subunit	Acetate and butyrate kinase
Adaptor protein complex_ sigma subunit	Acetate kinase
Adenosine deaminase-related growth factor	Alanine racemase_ N-terminal
Adenosine kinase	AP endonuclease_ family 2
Adenosine/AMP deaminase active site	Bile acid:sodium symporter
Adenylate cyclase-associated CAP_ C-terminal	Caleosin related
Adenylate cyclase-associated CAP_ N-terminal	Carbohydrate-binding WSC
Adenylate kinase	Chitin-binding_ type 1
Adenylate kinase_ subfamily	Dor1-like protein
Adenylate kinase_ zinc-finger lid region	Initiator tRNA phosphoribosyl transferase
Adenylate/cytidine kinase_ N-terminal	Low temperature viability protein
Adenylosuccinate lyase	N-acetylglucosaminyl transferase component
Adenylosuccinate synthetase	Nitrogen permease regulator 2
Adenylyl cyclase class-3/4/guanylyl cyclase	Nucleolar_ Nop52
Adenylylsulphate kinase_ C-terminal	Nucleotide-sensitive chloride conductance regulator
Adhesion regulating molecule	Protein of unknown function DUF159
Adrenodoxin	Protein of unknown function DUF77
AICARFT/IMPCHase bienzyme_ formylation region	PRP38
Alanine dehydrogenase/PNT_ C-terminal	Ribosomal biogenesis regulatory protein
Alanine dehydrogenase/PNT_ N-terminal	Ribosomal protein S24e
Alanine racemase/group IV decarboxylase_ C-terminal	SAICAR synthetase
Alanyl-tRNA synthetase_ class IIc	Tetraspanin
Alcohol dehydrogenase class III/S-(hydroxymethyl)glutathione dehydrogenase	Thiamin pyrophosphokinase_ catalytic region
Alcohol dehydrogenase GroES-like	Thiamin pyrophosphokinase_ vitamin B1-binding region
Alcohol dehydrogenase_ zinc-binding	Transcriptional coactivator p15
Alcohol dehydrogenase_ zinc-containing_ conserved site
Aldehyde dehydrogenase NAD(P)-dependent	R.placenta|W.cocos|C. puteana|H.pinastri|F.radiculos
Aldehyde dehydrogenase_ conserved site	RNase P subunit p30
Aldehyde/histidinol dehydrogenase
Aldose 1-epimerase	R.placenta|W.cocos|C. puteana|S.lacrymans|F.radiculos
ALG3	Homocysteine S-methyltransferase
ALG6_ ALG8 glycosyltransferase	Translation factor_ SUA5 type
Alg9-like mannosyltransferase
Alkaline-phosphatase-like_ core domain
Alkyl hydroperoxide reductase/ Thiol specific antioxidant/ Mal allergen
Allantoicase
Allantoicase region
Allantoicase-like
Allantoinase
Allophanate hydrolase subunit 1
Allophanate hydrolase subunit 2
Alpha tubulin
Alpha/beta hydrolase fold-1
Alpha/beta hydrolase fold-3
Alpha_alpha-trehalose-phosphate synthase
Alpha-1_2-mannosidase_ putative
Alpha-amylase_ C-terminal all beta
Alpha-amylase_ domain of unknown function DUF1966_ C-terminal
Alpha-amylase_ thermostable
Alpha-D-phosphohexomutase_ alpha/beta/alpha domain I
Alpha-D-phosphohexomutase_ alpha/beta/alpha domain II
Alpha-D-phosphohexomutase_ alpha/beta/alpha domain III
Alpha-D-phosphohexomutase_ alpha/beta/alpha I_ II and III
Alpha-D-phosphohexomutase_ conserved site
Alpha-D-phosphohexomutase_ C-terminal
Alpha-D-phosphohexomutase_ N-terminal
Alpha-helical ferredoxin
Alpha-hydroxy acid dehydrogenase_ FMN-dependent
Alpha-isopropylmalate/homocitrate synthase_ conserved site
Alpha-N-acetylglucosaminidase
Alternative oxidase
Amidase signature enzyme
Amidase_ fungi type
Amidohydrolase 1
Amidohydrolase 3
Amidophosphoribosyl transferase
Amino acid adenylation
Amino acid permease_ conserved site
Amino acid transporter_ transmembrane
Aminoacyl-tRNA synthetase_ class 1a_ anticodon-binding
Aminoacyl-tRNA synthetase_ class I (M)
Aminoacyl-tRNA synthetase_ class I_ anticodon-binding
Aminoacyl-tRNA synthetase_ class I_ conserved site
Aminoacyl-tRNA synthetase_ class Ib
Aminoacyl-tRNA synthetase_ class II
Aminoacyl-tRNA synthetase_ class II (D_ K and N)
Aminoacyl-tRNA synthetase_ class II (G_ H_ P and S)
Aminoglycoside phosphotransferase
Aminotransferase_ class V/Cysteine desulphurase
Aminotransferase_ class-II_ pyridoxal-phosphate binding site
Aminotransferases_ class-I_ pyridoxal-phosphate-binding site
AMMECR1
Ammonium transporter
AMP deaminase
Amylo-alpha-1_6-glucosidase
Anaphase promoting complex subunit 2
Anaphase-promoting complex_ subunit 10
Anion-transporting ATPase
ANTH
Anthranilate phosphoribosyl transferase
Anthranilate synthase component I
Anthranilate synthase component II/delta crystallin
Anthranilate synthase_ component II_ fungi
Anti-proliferative protein
APOBEC/CMP deaminase_ zinc-binding
Apoptosis regulator Bcl-2 protein_ BAG
Aquaporin
Arf GTPase activating protein
ArgE/DapE/ACY1/CPG2/YscS_ conserved site
Arginase
Arginase_ subgroup
Argininosuccinate lyase
Argininosuccinate synthase
Arginyl-tRNA synthetase_ class Ic
Arginyl-tRNA synthetase_ class Ic_ core
Armadillo
Armadillo-type fold
Aromatic amino acid beta-eliminating lyase/threonine aldolase
Aromatic-L-amino-acid decarboxylase
ARP2/3 complex 16 kDa subunit (p16-Arc)
Arp2/3 complex_ 34kDa subunit p34-Arc
Arrestin-like_ C-terminal
Arrestin-like_ N-terminal
Asparagine synthase
Asparagine synthase_ glutamine-hydrolyzing
Aspartate carbamoyltransferase_ eukaryotic
Aspartate decarboxylase-like fold
Aspartate kinase region
Aspartate/homoserine dehydrogenase_ NAD-binding
Aspartate/ornithine carbamoyltransferase
Aspartate/ornithine carbamoyltransferase_ Asp/Orn-binding region
Aspartate/ornithine carbamoyltransferase_ carbamoyl-P binding
Aspartate/other aminotransferase
Aspartyl-tRNA synthetase_ class IIb_ archea/euk type
Ataxin-2_ N-terminal
ATP dependent DNA ligase_ central
ATP dependent DNA ligase_ C-terminal
ATP phosphoribosyltransferase_ catalytic region
ATP10
ATP11
ATP12 ATPase
ATPase AAA-2
ATPase associated with various cellular activities_ AAA-5
ATPase_ BadF/BadG/BcrA/BcrD type
ATPase_ F0 complex_ subunit A
ATPase_ F0 complex_ subunit B_ mitochondrial
ATPase_ F0 complex_ subunit D_ mitochondrial
ATPase_ F0/V0 complex_ subunit C
ATPase_ F1 complex_ alpha subunit
ATPase_ F1 complex_ beta subunit
ATPase_ F1 complex_ delta/epsilon subunit
ATPase_ F1 complex_ epsilon subunit_ mitochondrial
ATPase_ F1 complex_ gamma subunit
ATPase_ F1 complex_ OSCP/delta subunit
ATPase_ F1/V1/A1 complex_ alpha/beta subunit_ C-terminal
ATPase_ F1/V1/A1 complex_ alpha/beta subunit_ N-terminal
ATPase_ F1/V1/A1 complex_ alpha/beta subunit_ nucleotide-binding
ATPase_ P type cation/copper-transporter
ATPase_ P-type cation exchange_ alpha subunit
ATPase_ P-type cation-transporter_ C-terminal
ATPase_ P-type cation-transporter_ N-terminal
ATPase_ P-type_ K/Mg/Cd/Cu/Zn/Na/Ca/Na/H-transporter
ATPase_ V0 complex_ proteolipid subunit C_
ATPase_ V0 complex_ proteolipid subunit C_ eukaryotic
ATPase_ V0 complex_ subunit D
ATPase_ V0 complex_ subunit E
ATPase_ V0/A0 complex_ 116-kDa subunit
ATPase_ V0/A0 complex_ subunit C/D
ATPase_ V1 complex_ subunit A
ATPase_ V1 complex_ subunit B
ATPase_ V1 complex_ subunit C
ATPase_ V1 complex_ subunit H
ATPase_ V1/A1 complex_ subunit D
ATPase_ V1/A1 complex_ subunit E
ATP-citrate lyase/succinyl-CoA ligase_ active site
ATP-cone
ATP-dependent DNA ligase_ conserved site
ATP-grasp fold
ATP-grasp fold_ ATP-dependent carboxylate-amine ligase-type
ATP-grasp fold_ succinyl-CoA synthetase-type
ATP-NAD kinase_ PpnK-type
ATP-NAD/AcoX kinase
ATP-sulphurylase
AT-rich interaction region
Autophagocytosis associated protein_ C-terminal
Autophagocytosis associated protein_ N-terminal
Autophagy protein 12
Autophagy protein 16
Autophagy protein 5
Autophagy protein 6
Autophagy protein 99
Auxin efflux carrier
AWS
B302_ (SPRY)-like
Bacterial alpha-L-rhamnosidase
Bacterial Fmu (Sun)/eukaryotic nucleolar NOL1/Nop2p
Bacterial transferase hexapeptide repeat
Bacterial transketolase
BAR
Barren
Barwin
Basic helix-loop-helix_ Nulp1-type
Basic leucine zipper
Batten's disease protein Cln3
B-cell receptor-associated 31-like
BCS1 N terminal
Beige/BEACH
Berberine/berberine-like
Beta tubulin_ autoregulation binding site
Beta-glucan synthesis-associated_ SKN1
Beta-ketoacyl synthase_ C-terminal
Beta-ketoacyl synthase_ N-terminal
Beta-lactamase-type transpeptidase fold
Beta-trefoil
Bicarbonate transporter_ C-terminal
Bicupin_ oxalate decarboxylase/oxidase
Bifunctional 6-phosphofructo-2-kinase/fructose-2_ 6-bisphosphate 2-phosphatase
BING4_ C-terminal
Biotin and thiamin synthesis associated
Biotin carboxylase_ C-terminal
Biotin carboxylation region
Biotin synthase
Biotin-binding site
BNR repeat
BOP1_ N-terminal
BP28_ C-terminal
BPG-independent PGAM_ N-terminal
Branched-chain amino acid aminotransferase II
Brf1-like TBP-binding
Brix
BRO1
BTB/POZ fold
BTB/POZ-like
Bud-site selection protein_ BUD22
Bystin
bZIP transcription factor_ bZIP-1
C2 calcium/lipid-binding region_ CaLB
C2 calcium-dependent membrane targeting
Cadherin-like
Calcipressin
Calcium ATPase
Calcium-translocating P-type ATPase_ PMCA-type
Calponin-homology
Calreticulin/calnexin
Calreticulin/calnexin_ P
Calycin-like
cAMP/cGMP-dependent protein kinase
cAMP-dependent protein kinase regulatory subunit
cAMP-dependent protein kinase_ regulatory subunit_ type I/II alpha/beta
Camphor resistance CrcB protein
cAMP-regulated phosphoprotein/endosulphine conserved region
Carbamoyl phosphate synthase_ GATase region
Carbamoyl phosphate synthase_ large subunit
Carbamoyl phosphate synthase_ large subunit_ glutamine-dependent
Carbamoyl phosphate synthase_ large subunit_ N-terminal
Carbamoyl phosphate synthase_ small subunit
Carbamoyl phosphate synthase_ small subunit_ N-terminal
Carbamoyl phosphate synthetase_ large subunit_ ATP-binding
Carbamoyl phosphate synthetase_ large subunit_ oligomerisation
Carbohydrate kinase
Carbohydrate kinase_ thermoresistant glucokinase
Carbohydrate/puine kinase_ PfkB_ conserved site
Carbohydrate/purine kinase
Carbohydrate-binding family V/XII
Carbohydrate-binding-like fold
Carbonic anhydrase
Carboxyl transferase
Carotenoid oxygenase
CARP motif
CAS/CSE_ C-terminal
Cas1p-like
CASP_ C-terminal
Catalase_ N-terminal
CBF
CCR4-Not complex component_ Not1
CCR4-NOT complex_ subunits 3 and 5
Cdc15/Fes/CIP4
Cdc23
Cdk-activating kinase assembly factor_ MAT1
CDP-diacylglycerol--serine O-phosphatidyltransferase
Cell cycle checkpoint_ HUS1
Cell differentiation proteins_ Rcd1-like
Cell division control 14_ SIN component
Cell division protein 48_ CDC48_ domain 2
Cellular retinaldehyde binding/alpha-tocopherol transport
Cellular retinaldehyde-binding/triple function_ C-terminal
Centromere protein B_ helix-turn-helix
ChaC-like protein
Chaperone DnaJ_ C-terminal
Chaperone DnaK
Chaperonin Cpn10
Chaperonin GroEL
Chaperonin TCP-1_ conserved site
CheY-like
Chitin synthase
Chitin synthase N-terminal
Chloride channel_ core
Chloride channel_ voltage gated
Choline/ethanolamine kinase
Choline/ethanolaminephosphotransferase
Chondroitin AC/alginate lyase
CHORD
Chorismate binding_ C-terminal
Chorismate mutase
Chorismate mutase of the AroQ class_ eukaryotic type
Chromatin associated protein KTI12
Chromatin SPT2
Chromo domain
Chromo domain-like
Chs5p-Arf1p binding
Citrate synthase_ eukaryotic
Citrate synthase-like
Citrate synthase-like_ core
Citron-like
Clathrin adaptor_ alpha/beta/gamma-adaptin_ appendage_ Ig-like subdomain
Clathrin adaptor_ alpha-adaptin_ appendage_ C-terminal subdomain
Clathrin adaptor_ gamma-adaptin_ appendage
Clathrin adaptor_ mu subunit
Clathrin adaptor_ mu subunit_ C-terminal
Clathrin adaptor_ sigma subunit/coatomer_ zeta subunit
Clathrin light chain
Clathrin/coatomer adaptor_ adaptin-like_ appendage_ C-terminal subdomain
Clathrin/coatomer adaptor_ adaptin-like_ appendage_ Ig-like subdomain
Clathrin/coatomer adaptor_ adaptin-like_ N-terminal
Clathrin_ heavy chain
Clathrin_ heavy chain/VPS_ 7-fold repeat
Clathrin_ heavy chain_ linker_ core motif
Clathrin_ heavy chain_ propeller_ N-terminal
Cleavage and polyadenylation specificity factor_ 25 kDa subunit
Cleavage and polyadenylation specificity factor_ A subunit_ C-terminal
Clp_ N-terminal
ClpX_ ATPase regulatory subunit
CMP/dCMP deaminase_ zinc-binding
Coatomer_ alpha subunit
Coatomer_ alpha subunit_ C-terminal
Coatomer_ beta subunit
Coatomer_ beta' subunit
Coatomer_ beta subunit_ C-terminal
Coatomer_ epsilon subunit
Coatomer_ gamma subunit
Coatomer_ gamma subunit _ appendage
Coatomer_ WD associated region
CoA-transferase family III
Cobalamin (vitamin B12) biosynthesis CobW-like
Cobalamin (vitamin B12) biosynthesis CobW-like_ C-terminal
Cobalamin (vitamin B12)-independent methionine synthase MetE_ N-terminal
Co-chaperone Hsc20
Coenzyme A transferase
Coenzyme A transferase active site
Coenzyme Q biosynthesis Coq4
COG complex component_ COG2
COG4 transport
Concanavalin A-like lectin/glucanase
Concentrative nucleoside transporter
Condensation domain
Conserved carboxylase region
Conserved hypothetical protein CHP00091
Conserved hypothetical protein CHP00092
Conserved hypothetical protein CHP00245
Conserved hypothetical protein CHP00730
Conserved hypothetical protein CHP02452
Conserved hypothetical protein CHP02453
Conserved hypothetical protein CHP02464
Conserved oligomeric complex COG6
Copper amine oxidase_ C-terminal
Copper amine oxidase_ N2-terminal
Copper amine oxidase_ N3-terminal
Copper amine oxidase_ N-terminal region
Copper chaperone SCO1/SenC
Cornichon
Creatinase
Crotonase_ core
CS
CS domain
CT11-RanBPM
CT20
CTP synthase
CTP synthase_ N-terminal
Cullin homology
Cullin repeat-like
Cullin_ conserved site
Cullin_ N-terminal region
Cupin 1
Cupin 2_ conserved barrel
Cupin_ RmlC-type
Cyanase
Cyanate lyase_ C-terminal
Cyclic-AMP phosphodiesterase/lactamase
Cyclic-AMP phosphodiesterase_ class-II
Cyclin_ A/B/D/E
Cyclin-dependent kinase_ regulatory subunit
Cyclin-like
Cyclin-related 2
Cyclophilin-like
Cys/Met metabolism_ pyridoxal phosphate-dependent enzyme
Cystathionine beta-synthase_ core
Cysteine synthase/cystathionine beta-synthase P-phosphate-binding site
Cysteinyl-tRNA synthetase_ class Ia
Cysteinyl-tRNA synthetase_ class Ia_ N-terminal
Cytidine deaminase-like
Cytidyltransferase-related
Cytochrome b-245_ heavy chain
Cytochrome c and c1 haem-lyase
Cytochrome c oxidase subunit IV
Cytochrome c oxidase_ subunit Va
Cytochrome c oxidase_ subunit Vb
Cytochrome c oxidase_ subunit VIa
Cytochrome c oxidase_ subunit VIb
Cytochrome c_ monohaem
Cytochrome c1
Cytochrome cd1-nitrite reductase-like_ C-terminal haem d1
Cytochrome oxidase assembly
Cytochrome P450_ E-class_ group I
Cytochrome P450_ E-class_ group IV
Cytoskeleton-associated protein_ CAP-Gly
D123
DAHP synthetase I/KDSA
DAHP synthetase_ class II
Dak kinase
Dak phosphatase
DALR anticodon binding
DASH complex_ subunit Ask1
DASH complex_ subunit Dad1
DASH complex_ subunit Dad4
Dbl homology (DH) domain
DBP10CT
dCTP Deaminase
DEAD2
DEAD-like helicase_ N-terminal
Defender against death DAD protein
Dehydrogenase_ E1 component
Dehydroquinase class I
DEK C terminal
Delayed-early response protein/equilibrative nucleoside transporter
Delta 1-pyrroline-5-carboxylate reductase
Delta-1-pyrroline-5-carboxylate dehydrogenase 1
Delta-9 acyl-CoA desaturase with haem/steroid binding region
DENN
Deoxyhypusine synthase
Deoxyribonuclease_ TatD-related
DeoxyUTP pyrophosphatase
DeoxyUTP pyrophosphatase subfamily 1
Dephospho-CoA kinase
DHAP synthase_ class 1
Diacylglycerol acyltransferase
Diacylglycerol kinase_ catalytic region
Diaphanous autoregulatory
Di-copper centre-containing
DIE2/ALG10
Dihydrodipicolinate synthetase
Dihydrofolate reductase region
Dihydrolipoamide acetyltransferase_ long form
Dihydrolipoamide dehydrogenase
Dihydrolipoamide succinyltransferase
Dihydroorotase homodimeric type
Dihydroorotase_ conserved site
Dihydroorotate dehydrogenase_ class 2
Dihydroorotate dehydrogenase_ core
Dihydropteroate synthase
Dihydropteroate synthase_ DHPS
Dihydropteroate synthase-like
Dilute
Dimethylaniline monooxygenase_ N-oxide-forming
Diphosphomevalonate decarboxylase
Diphthamide synthesis_ DHP1
Diphthamide synthesis_ DPH1/DHP2
Disulphide isomerase
Divalent ion symporter
DKCLD
DNA 3-phosphatase
DNA breaking-rejoining enzyme_ catalytic core
DNA glycosylase
DNA glycosylase/AP lyase_ catalytic domain
DNA glycosylase/AP lyase_ H2TH DNA-binding
DNA helicase (DNA repair)_ Rad3 type
DNA helicase_ ATP-dependent_ Ku type
DNA helicase_ ATP-dependent_ Ku70 subunit
DNA helicase_ ATP-dependent_ RecQ type
DNA helicase_ UvrD/REP type
DNA helicase_ UvrD-like_ C terminal
DNA ligase_ N-terminal
DNA mismatch repair protein Msh6
DNA mismatch repair protein MutS_ clamp
DNA mismatch repair protein MutS_ connector
DNA mismatch repair protein MutS_ core
DNA mismatch repair protein MutS-like_ N-terminal
DNA mismatch repair protein_ C-terminal
DNA mismatch repair protein_ MSH2
DNA mismatch repair protein_ N-terminal
DNA mismatch repair_ conserved site
DNA photolyase_ FAD-binding/Cryptochrome_ C-terminal
DNA polymerase alpha/epsilon_ subunit B
DNA polymerase delta_ subunit 4
DNA polymerase epsilon_ subunit B
DNA polymerase III clamp loader subunit_ C-terminal
DNA primase_ large subunit_ eukaryotic
DNA primase_ large subunit_ eukaryotic/archaeal
DNA primase_ small subunit
DNA primase_ small subunit_ eukaryotic and archaeal
DNA repair exonuclease
DNA repair nuclease_ XPF-type/Helicase
DNA repair protein Rad4
DNA repair protein_ Rev1
DNA replication factor C_ large subunit
DNA replication factor RFC1_ C-terminal
DNA topoisomerase I_ catalytic core_ eukaryotic-type
DNA topoisomerase I_ C-terminal
DNA topoisomerase I_ C-terminal_ eukaryotic-type
DNA topoisomerase I_ DNA binding_ eukaryotic-type
DNA topoisomerase II_ eukaryotic-type
DNA topoisomerase_ type IA_ central
DNA topoisomerase_ type IA_ core
DNA topoisomerase_ type IA_ DNA-binding
DNA topoisomerase_ type IA_ domain 2
DNA topoisomerase_ type IIA_ central
DNA topoisomerase_ type IIA_ subunit A or C-terminal
DNA topoisomerase_ type IIA_ subunit B or N-terminal
DNA topoisomerase_ type IIA_ subunit B_ conserved region
DNA topoisomerase_ type IIA_ subunit B_ region 2
DNA/pantothenate metabolism flavoprotein_ C-terminal
DNA/RNA helicase_ ATP-dependent_ DEAH-box type_ conserved site
DNA/RNA helicase_ C-terminal
DNA/RNA helicase_ DEAD/DEAH box type_ N-terminal
DNA/RNA non-specific endonuclease
DNA-binding RFX
DNA-binding SAP
DNA-binding TFAR19-related protein
DNA-directed DNA polymerase_ family A
DNA-directed DNA polymerase_ family B
DNA-directed DNA polymerase_ family B_ pol2
DNA-directed DNA polymerase_ family B_ conserved region
DNA-directed DNA polymerase_ family B_ exonuclease
DNA-directed DNA polymerase_ family X
DNA-directed DNA polymerase_ family X_ beta-like
DNA-directed DNA polymerase_ family X_ beta-like_ N-terminal
DNA-directed DNA-polymerase_ family A_ mitochondria
DNA-directed RNA polymerase_ 14 to 18 kDa subunit
DNA-directed RNA polymerase_ 30-40 kDa subunit_ conserved site
DNA-directed RNA polymerase_ bacteriophage type
DNA-directed RNA polymerase_ dimerisation
DNA-directed RNA polymerase_ insert
DNA-directed RNA polymerase_ M/15 kDa subunit
DNA-directed RNA polymerase_ RBP11-like
DNA-directed RNA polymerase_ RPB5 subunit
DNA-directed RNA polymerase_ RpoA/D/Rpb3-type
DNA-directed RNA polymerase_ subunit 2_ domain 6
Dolichyl-diphosphooligosaccharide-protein glycosyltransferase 48kDa subunit
Dopa 4_5-dioxygenase
Dopey_ N-terminal
Down-regulated in metastasis
Drug resistance transporter EmrB/QacA subfamily
DSBA oxidoreductase
DSH_ C-terminal
dTDP-4-dehydrorhamnose reductase
Dullard-like phosphatase domain
DWNN domain
Dynactin p62
Dynamin central region
Dynamin_ GTPase region
Dynamitin
Dynein heavy chain
Dynein heavy chain_ N-terminal region 1
Dynein heavy chain_ N-terminal region 2
Dynein light intermediate chain
Dynein regulator
E1-like protein-activating enzyme Gsa7p/Apg7p
E2 binding
E3 ubiquitin ligase_ BRE1
E3 ubiquitin ligase_ region of unknown function DUF908
E3 ubiquitin ligase_ region of unknown function DUF913
E3 ubiquitin ligase_ SCF complex_ Skp subunit
EB1_ C-terminal
EF hand associated_ type-1
EF hand associated_ type-2
EF-hand_ Ca insensitive
EGF-like region_ conserved site
Electron transfer flavoprotein_ alpha subunit_ C-terminal
Electron transfer flavoprotein_ alpha/beta-subunit_ N-terminal
Electron transfer flavoprotein_ beta subunit
Electron transfer flavoprotein_ beta-subunit_ core
Electron transfer flavoprotein-ubiquinone oxidoreductase
Elongation factor G_ III and V
Endonuclease III_ conserved site-2
Endoplasmic reticulum_ protein ERp29_ C-terminal
Endoribonuclease L-PSP/chorismate mutase-like
Engulfment and cell motility_ ELM
Enolase
ENTH/VHS
Epoxide hydrolase-like
Epsin_ N-terminal
Epsin-like_ N-terminal
eRF1 domain 1
eRF1 domain 2
eRF1 domain 3
ERG2 and sigma1 receptor-like
ERG4/ERG24 ergosterol biosynthesis protein
ESCRT-II complex_ vps25 subunit
Esterase_ SGNH hydrolase-type
ETC complex I subunit
ETC complex I subunit conserved region
Etoposide-induced 2.4
Eukaryotic initiation factor 3_ gamma subunit
Eukaryotic pantothenate kinase
Eukaryotic phosphomannomutase
Eukaryotic rRNA processing
Eukaryotic translation initiation factor 2A_ central region
Eukaryotic-type methylenetetrahydrofolate reductase
Exo70 exocyst complex subunit
Exocyst complex component Sec10
Exocyst complex subunit Sec15-like
Exonuclease
Exonuclease_ RNase T and DNA polymerase III
Exoribonuclease_ phosphorolytic domain 1
Exoribonuclease_ phosphorolytic domain 2
Exportin 1_ C-terminal
Exportin_ Cse1-like
Exportin-1/Importin-beta-like
EXS_ C-terminal
Extracellular membrane protein_ 8-cysteine region_ CFEM
Extracellular membrane protein_ 8-cysteine region_ fungi
FACT complex subunit Spt16p/Cdc68p
F-actin capping protein_ beta subunit
FAD dependent oxidoreductase
FAD/NAD-linked reductase_ dimerisation
FAD-binding 8
FAD-binding_ type 1
FAD-binding_ type 2
FAD-dependent glycerol-3-phosphate dehydrogenase
FAD-linked oxidase_ C-terminal
FAD-linked oxidase-like_ C-terminal
Farnesyl-diphosphate farnesyltransferase
Fatty acid desaturase_ type 1_ core
Fatty acid desaturase_ type 1_ C-terminal
Fatty acid desaturase_ type 1_ N-terminal
Fatty acid hydroxylase
Fatty acid synthase
Fatty acid/sphingolipid desaturase
Fcf2 pre-rRNA processing
Ferredoxin
Ferric reductase_ NAD binding
Ferric reductase-like transmembrane component_ N-terminal
Ferritin/ribonucleotide reductase-like
Ferrochelatase
Fibrillarin
Fibronectin_ type III
Fibronectin_ type III-like fold
FKBP12-rapamycin-associated protein_ FKBP12-rapamycin-binding
Flavocytochrome c
Flavoprotein WrbA
FMN-binding split barrel_ related
FMN-dependent alpha-hydroxy acid dehydrogenase_ active site
Folate-binding_ YgfZ
Folylpolyglutamate synthetase
Formate-tetrahydrofolate ligase_ FTHFS
Formyl transferase_ C-terminal
Formyl transferase_ C-terminal-like
Frataxin
Frataxin-like
FRG1-like
Fructose-bisphosphate aldolase_ class II_ yeast/E. coli subtype
Fumarate reductase/succinate dehydrogenase flavoprotein_ C-terminal
Fumarate reductase/succinate dehydrogenase flavoprotein_ N-terminal
Fumarate reductase/succinate dehydrogenase flavoprotein-like_ C-terminal
Fumarate reductase/succinate dehydrogenase_ FAD-binding site
Fumarylacetoacetase_ C-terminal-like
Fumarylacetoacetase_ C-terminal-related
Fumble
G protein alpha subunit_ helical insertion
G10 protein
Gaa1-like_ GPI transamidase component
Galactokinase
Galactose oxidase/kelch_ beta-propeller
Galactose-binding like
Gamma-glutamyl phosphate reductase GPR
Gar1 protein RNA-binding region
GatB N-terminal region
GatB/Yqey
GatB_ central region
GC-rich sequence DNA-binding factor-like
GDP-mannose 4_6-dehydratase
Gelsolin region
GHMP kinase_ ATP-binding_ conserved site
GHMP kinase_ C-terminal
GINS complex_ Psf2 component
GINS complex_ Psf3 component
GINS complex_ Sld5 component
Globin-like
Glucan 1_4-alpha-glucosidase_ starch-binding
Glucosamine/galactosamine-6-phosphate isomerase
Glucosamine-6-phosphate isomerase
Glucosamine-fructose-6-phosphate aminotransferase_ isomerising
Glucose-6-phosphate dehydrogenase
Glucose-methanol-choline oxidoreductase_ C-terminal
Glucose-methanol-choline oxidoreductase_ N-terminal
Glucosidase II beta subunit-like
Glutamate 5-kinase
Glutamate 5-kinase_ ProB-related
Glutamate decarboxylase
Glutamate dehydrogenase_ NAD-dependent
Glutamate synthase_ alpha subunit_ C-terminal
Glutamate synthase_ central-C
Glutamate synthase_ central-N
Glutamate synthase_ eukaryotic
Glutamate synthase_ NADH/NADPH_ small subunit 1
Glutamate/phenylalanine/leucine/valine dehydrogenase_ C-terminal
Glutamine amidotransferase class-I_ C-terminal
Glutamine amidotransferase of anthranilate synthase
Glutamine amidotransferase superfamily
Glutamine amidotransferase_ class I_ active site
Glutamine synthetase_ beta-Grasp
Glutamine-dependent NAD(+) synthetase_ GAT region
Glutaminyl-tRNA synthetase_ class Ic
Glutamyl/glutaminyl-tRNA synthetase_ class Ic
Glutamyl-tRNA synthetase_ class Ic_ archaeal/eukaryotic cytosolic
Glutamyl-tRNA synthetase_ class Ic_ bacterial/mitochondrial
Glutamyl-tRNA(Gln) amidotransferase B subunit
Glutaredoxin
Glutaredoxin subgroup
Glutaredoxin-related protein
Glutathione degradosome_ DUG1
Glutathione peroxidase
Glutathione reductase_ animal and bacterial
Glutathione S-transferase_ C-terminal-like
Glutathione S-transferase_ omega-class
Glutathione S-transferase_ predicted
Glutathione synthase_ eukaryotic
Glutathione synthase_ substrate-binding_ eukaryotic
Glyceraldehyde 3-phosphate dehydrogenase
Glyceraldehyde-3-phosphate dehydrogenase_ type I
Glycerol kinase
Glycerophosphoryl diester phosphodiesterase
Glycine cleavage H-protein
Glycine cleavage H-protein_ subgroup
Glycine cleavage system T protein
Glycine cleavage T-protein_ C-terminal barrel
Glycine cleavage T-protein_ N-terminal
Glycine hydroxymethyltransferase
Glycogen synthase
Glycogen/starch/alpha-glucan phosphorylase
Glycolipid transfer protein_ GLTP
Glycoside hydrolase 15-related
Glycoside hydrolase family 2_ immunoglobulin-like beta-sandwich
Glycoside hydrolase/deacetylase_ beta/alpha-barrel
Glycoside hydrolase_ carbohydrate-binding
Glycoside hydrolase_ catalytic core
Glycoside hydrolase_ family 18_ N-terminal
Glycoside hydrolase_ family 18_ catalytic domain
Glycoside hydrolase_ family 20_ catalytic core
Glycoside hydrolase_ family 30
Glycoside hydrolase_ family 38_ central region
Glycoside hydrolase_ family 38_ core
Glycoside hydrolase-type carbohydrate-binding
Glycosyl hydrolase 53
Glycosyl hydrolase 92
Glycosyl hydrolase_ family 13_ catalytic region
Glycosyl hydrolase_ family 13_ subfamily_ catalytic region
Glycosyl hydrolases 38_ C-terminal
Glycosyl transferase_ family 15
Glycosyl transferase_ family 20
Glycosyl transferase_ family 28
Glycosyl transferase_ family 28_ C-terminal
Glycosyl transferase_ family 3
Glycosyl transferase_ family 35
Glycosyl transferase_ family 39
Glycosyl transferase_ family 4
Glycosyl transferase_ family 48
Glycosylphosphatidylinositol anchor biosynthesis
Glycosyltransferase sugar-binding region containing DXD motif
Glycyl-tRNA synthetase_ alpha2 dimer
Glyoxal oxidase_ N-terminal
Glyoxalase I
Glyoxalase/bleomycin resistance protein/dioxygenase
GMP synthase_ C-terminal
GMP synthase_ N-terminal
GNL3L/Grn1 putative GTPase
GNS1/SUR4 membrane protein
GOLD
Gonadotropin-releasing hormone
Got1-like protein
GPCR_ rhodopsin-like
GPI ethanolamine phosphate transferase 1_ C-terminal
G-protein_ beta subunit
GRASP55/65
GRIM-19
GRIP
GroEL-like chaperone_ ATPase
GroES-like
Growth-arrest-specific protein 2
GrpE nucleotide exchange factor
GrpE nucleotide exchange factor_ head
GTP cyclohydrolase II
GTP1/OBG_ conserved site
GTP-binding protein LepA_ C-terminal
GTP-binding protein Obg/CgtA
Guanine-nucleotide dissociation stimulator_ CDC24_ conserved site
GWT1
H3K56 histone acetylation protein_ RTT109
HAD-superfamily hydrolase_ subfamily IA_ variant 3
HAD-superfamily hydrolase_ subfamily IB_ hypothetical 1
HAD-superfamily hydrolase_ subfamily IB_ PSPase-like
HAD-superfamily hydrolase_ subfamily IIA
HAD-superfamily hydrolase_ subfamily IIA_ CECR5
HAD-superfamily hydrolase_ subfamily IIB
HAD-superfamily hydrolase_ subfamily IIIA
HAD-superfamily hydrolase_ subfamily IIID
HAD-superfamily phosphatase_ subfamily IIIA
Haem oxygenase-like
Haem oxygenase-like_ multi-helical
Haem peroxidase
Haem peroxidase_ animal
Haloacid dehalogenase_ type II
Haloacid dehydrogenase/epoxide hydrolase
HAS subgroup
HCNGP-like
Heat shock chaperonin-binding
Heat shock cognate protein B_ C-terminal oligomerisation
Heat shock factor binding 1
Heat shock protein 70
Heat shock protein 9/12
Heat shock protein DnaJ_ cysteine-rich region
Heat shock protein Hsp70
HECT
Helicase and RNase D C-terminal_ HRDC
Helicase/SANT-associated_ DNA binding
Helicase_ ATP-dependent_ c2 type
Helicase_ superfamily 1 and 2_ ATP-binding
Helicase_ superfamily 1 and 2_ ATP-binding_ DinG/Rad3-type
Helicase_ superfamily 1_ UvrD-related
Helicase-like_ DEXD box c2 type
Helix-hairpin-helix motif_ class 2
Helix-loop-helix DNA-binding
Helix-turn-helix type 3
Hemimethylated DNA-binding region
Hepatocellular carcinoma-associated antigen 59
HesB/YadR/YfhF
HesB/YadR/YfhF-like
Heterokaryon incompatibility
High mobility group box_ HMG
High mobility group box_ HMG1/HMG2
HIRA-interacting protein 5
HIRAN
Histidine biosynthesis
Histidine biosynthesis HisG_ C-terminal
Histidine biosynthesis_ HisF
Histidine triad (HIT) protein
Histidine triad-like motif
Histidinol dehydrogenase
Histidinol-phosphate aminotransferase
Histidyl-tRNA synthetase_ class IIa_ subgroup
Histone deacetylase interacting
Histone H1/H5
Histone H2B
Histone H3
Histone H5
Histone methylation DOT1
Histone-fold
Homeodomain-like
Homoaconitase_ mitochondrial
Homocitrate synthase_ fungi and archaea
Homoserine acetyltransferase
Homoserine dehydrogenase_ catalytic
Homoserine O-acetyltransferase
HOOK
HR1 rho-binding repeat
HR1-like rho-binding repeat
HRDC-like
Hrf1
HSP20-like chaperone
HSP40/DnaJ peptide-binding
Hus1-like protein
Hydantoinase/oxoprolinase
Hydantoinaseoxoprolinase_ N-terminal
Hydroxyisourate hydrolase
Hydroxymethylglutaryl-CoA reductase_ class I/II_ catalytic
Hydroxymethylglutaryl-CoA reductase_ class I/II_ NAD/NADP-binding
Hydroxymethylglutaryl-CoA reductase_ class I/II_ substrate-binding
Hydroxymethylglutaryl-CoA reductase_ class I_ catalytic
Hydroxymethylglutaryl-CoA synthase_ eukaryotic
Hydroxymethylglutaryl-coenzyme A synthase C-terminal
Hydroxymethylglutaryl-coenzyme A synthase_ N-terminal
IKI3
Imidazole glycerol phosphate synthase_ subunit H
Immunoglobulin E-set
Immunoglobulin/major histocompatibility complex_ conserved site
IMP dehydrogenase
IMP dehydrogenase / GMP reductase_ conserved site
IMP dehydrogenase/GMP reductase
Importin-alpha-like_ importin-beta-binding region
Indigoidine synthase A like protein
Indole-3-glycerol phosphate synthase
Indole-3-glycerol phosphate synthase_ central region
Initiation factor 2
Initiation factor 2B related
Initiation factor eIF2 gamma_ C terminal
Initiation factor eIF-4 gamma_ MA3
Inner centromere protein_ ARK binding region
Inosine guanosine and xanthosine phosphorylase
Inositol phosphatase/fructose-1_6-bisphosphatase
Inositol polyphosphate related phosphatase
Intradiol ring-cleavage dioxygenase_ core
Intradiol ring-cleavage dioxygenase_ C-terminal
Ion transport
Ion transport 2
Iron hydrogenase
Iron hydrogenase_ large subunit_ C-terminal
Iron-containing alcohol dehydrogenase
ISC system FeS cluster assembly_ IscU scaffold
Isochorismatase hydrolase
Isocitrate dehydrogenase NAD-dependent_ mitochondrial
Isocitrate dehydrogenase NADP-dependent_ eukaryotic
Isocitrate lyase
Isocitrate lyase and phosphorylmutase_ core
Isoleucyl-tRNA synthetase_ class Ia
Isoleucyl-tRNA synthetase_ class Ia_ N-terminal
Isopentenyl transferase-like
Isopentenyl-diphosphate delta-isomerase
Isopentenyl-diphosphate delta-isomerase_ type 1
IWS1_ C-terminal
K Homology
K Homology_ prokaryotic type
K Homology_ type 1
K Homology_ type 2
Karyogamy protein_ KAR9
Kelch repeat type 1
Kelch repeat type 2
Ketopantoate reductase ApbA/PanE_ C-terminal
Ketopantoate reductase ApbA/PanE_ N-terminal
Ketosamine-3-kinase
Ketose-bisphosphate aldolase_ class-II
Kinase binding protein CGI-121
Kinase-associated KA1
Kinetochore-Ndc80 subunit Spc25
Kri1
Ku_ C-terminal
Ku70/Ku80_ N-terminal alpha/beta
Lactate dehydrogenase/glycoside hydrolase_ family 4_ C-terminal
Lactate/malate dehydrogenase
LAG1_ DNA binding
Lambda repressor-like_ DNA-binding
L-aminoadipate-semialdehyde dehydrogenase_ large subunit
L-Aspartase-like
LCCL
Lecithin:cholesterol acyltransferase
Legume-like lectin
LETM1-like
Leucine carboxyl methyltransferase
Leucine carboxyl methyltransferase_ LCTM1 1
Leucine-rich repeat_ ribonuclease inhibitor subtype
Leucyl-tRNA synthetase_ class Ia_ archaeal/eukaryotic cytosolic
Light chain 3 (LC3)
Like-Sm ribonucleoprotein_ core
Like-Sm ribonucleoprotein_ eukaryotic and archaea-type_ core
Like-Sm ribonucleoprotein-related_ core
Lipase_ GDSL
Lipase_ GDXG_ active site
Lipid-binding START
Lipin_ N-terminal conserved region
Lipoate synthase
Lipocalin
Lipopolysaccharide-modifying protein
LisH dimerisation motif
LisH dimerisation motif_ subgroup
LNS2_ Lipin/Ned1/Smp2
Longevity assurance proteins LAG1/LAC1
Longevity-assurance protein (LAG1)
Longin
Longin-like
Low density lipoprotein-receptor_ class A_ cysteine-rich
LUC7 related
Lysyl-tRNA synthetase_ class II
Lytic transglycosylase-like_ catalytic
Machado-Joseph disease protein MJD
Mad3/BUB1 homology region 1
Maf1 regulator
Maf-like protein
Mago nashi protein
Major facilitator superfamily MFS-1
Major sperm protein
Mak10 subunit_ NatC N(alpha)-terminal acetyltransferase
Malate dehydrogenase_ active site
Malate dehydrogenase_ NAD-dependent_ eukaryotes and gamma proteobacteria
Malate synthase
Malate synthase A
Malate synthase-like_ core
Male sterility_ NAD-binding
Malic enzyme_ conserved site
Malic enzyme_ NAD-binding
Malic enzyme_ N-terminal
Malonyl-CoA ACP transacylase_ ACP-binding
Mandelate racemase/muconate lactonizing enzyme_ C-terminal
Mandelate racemase/muconate lactonizing enzyme_ N-terminal
Mannose-6-phosphate isomerase
Mannose-6-phosphate isomerase_ type II
Mannose-6-phosphate isomerase_ type II_ C-terminal
Mannose-6-phosphate receptor_ binding
Mannose-P-dolichol utilization defect 1 protein
Mannosyltransferase_ DXD
Mannosyltransferase_ PIG-V
MaoC-like dehydratase
MAP kinase_ conserved site
MAP kinase_ p38
MAP65/ASE1
Maternal tudor protein
MATH
MCM protein 2
MCM protein 3
MCM protein 5
MCM protein 6
MD-2-related lipid-recognition
Mechanosensitive ion channel MscS
MED7
Mediator complex_ subunit MED14
Meiosis specific protein SPO22
meiotic nuclear division protein 1
Membrane bound O-acyl transferase_ MBOAT
Membrane-associated proteins in eicosanoid and glutathione metabolism (MAPEG)
Mercuric reductase
Metal-dependent hydrolase_ composite
Metal-dependent phosphohydrolase_ HD region_ subdomain
Metal-dependent protein hydrolase
Metalloenzyme
Metalloenzyme_ LuxS/M16 peptidase-like_ metal-binding
Methionine sulphoxide reductase A
Methionine sulphoxide reductase B
Methionyl-tRNA synthetase_ class Ia_ N-terminal
Methylated-DNA-[protein]-cysteine S-methyltransferase_ DNA binding
Methylenetetrahydrofolate reductase
Methylmalonate-semialdehyde dehydrogenase
Methylthioadenosine phosphorylase
Methyltransferase type 11
Methyltransferase type 12
Methyltransferase_ METTL2_ predicted
Methyltransferase-related
Mevalonate and galactokinase
Mevalonate kinase
MFS general substrate transporter
MGS-like
MgtE integral membrane region
Microsomal signal peptidase 12 kDa subunit
Microsomal signal peptidase 25 kDa subunit
MIF4G-like_ type 1
MIF4G-like_ type 2
MIF4G-like_ type 3
MIR
MIR motif
Miro-like
MIT
Mitochondrial distribution and morphology family 33_ fungi
Mitochondrial distribution and morphology family 35/apoptosis
Mitochondrial distribution and morphology protein family 31/32_ fungi
Mitochondrial genome maintenance MGM101
Mitochondrial glycoprotein
Mitochondrial import inner membrane translocase_ subunit Tim21
Mitochondrial import protein Pam17
Mitochondrial matrix Mmp37
Mitochondrial protein Pet127
Mitochondrial ribosome
Mitotic checkpoint
Mlu1-box-binding protein_ DNA-binding
MmgE/PrpD
Mo25-like
MoaA/nifB/pqqE_ iron-sulphur binding_ conserved site
Modifier of rudimentary_ Modr
MoeA_ C-terminal_ domain IV
MoeA_ N-terminal_ domain I and II
MoeZ/MoeB
Mog1/PsbP/DUF1795_ alpha/beta/alpha sandwich
Molybdenum cofactor biosynthesis
Molybdenum cofactor biosynthesis protein A
Molybdenum cofactor biosynthesis_ conserved site
Molybdenum cofactor synthesis C-terminal
Molybdopterin binding
Molybdopterin cofactor biosynthesis MoaC region
Molybdopterin oxidoreductase
Molybdopterin synthase/thiamin biosynthesis sulphur carrier_ beta-grasp
Moybdenum cofactor oxidoreductase_ dimerisation
MOZ/SAS-like protein
M-phase inducer phosphatase
Mpp10 protein
MPPN
Mre11_ DNA-binding
MRG
mRNA capping enzyme_ beta chain
mRNA capping enzyme_ large subunit
mRNA splicing factor SYF2
mRNA splicing factor_ Cwf18
mRNA splicing factor_ thioredoxin-like U5 snRNP
Mrp_ conserved site
MSF1
Mss4-like
Mtw1 kinetochore complex_ DSN1
Multicopper oxidase_ type 2
Multicopper oxidase_ type 3
Munc13 homology 1
Munc13 homology 2
Mur ligase_ central
Mur ligase_ C-terminal
MutL_ C-terminal_ dimerisation
Myo-inositol-1-phosphate synthase
Myo-inositol-1-phosphate synthase_ GAPDH-like
Myosin head_ motor region
Myosin tail 2
Myotubularin-related
Myristoyl-CoA:protein N-myristoyltransferase
N-(5'phosphoribosyl)anthranilate isomerase (PRAI)
N1221-like
N2_N2-dimethylguanosine tRNA methyltransferase
N2227-like
N-6 adenine-specific DNA methylase_ conserved site
Na+ dependent nucleoside transporter_ C-terminal
N-acetyl-gamma-glutamyl-phosphate reductase
N-acetylglucosaminyl phosphatidylinositol deacetylase
NAD(P) transhydrogenase_ alpha subunit
NAD(P) transhydrogenase_ beta subunit
NAD(P)-binding
NAD-dependent epimerase/dehydratase
NAD-dependent glycerol-3-phosphate dehydrogenase
NAD-dependent glycerol-3-phosphate dehydrogenase_ C-terminal
NAD-dependent glycerol-3-phosphate dehydrogenase_ N-terminal
NAD-dependent histone deacetylase_ silent information regulator Sir2
NADH dehydrogenase (ubiquinone)_ 20 kDa subunit
NADH dehydrogenase (ubiquinone)_ 24 kDa subunit
NADH dehydrogenase [ubiquinone] (complex I)_ 21 kDa subunit_ fungi
NADH dehydrogenase [ubiquinone] (complex I)_ alpha subcomplex_ subunit 8
NADH dehydrogenase 75 kDa subunit_ conserved site
NADH dehydrogenase I_ D subunit
NADH pyrophosphatase-like_ N-terminal
NADH ubiquinone oxidoreductase_ 20 kDa subunit
NADH:flavin oxidoreductase/NADH oxidase_ N-terminal
NADH:ubiquinone oxidoreductase complex I intermediate-associated protein 30
NADH-quinone oxidoreductase_ chain G
NADH-quinone oxidoreductase_ chain G_ C-terminal
NADH-quinone oxidoreductase_ chain I
NADH-ubiquinone oxidoreductase B18 subunit
NADH-ubiquinone oxidoreductase_ 51 kDa subunit
NADH-ubiquinone oxidoreductase_ 51 kDa subunit_ conserved site
NADH-ubiquinone oxidoreductase_ chain 49kDa
NADH-ubiquinone oxidoreductase_ chain 49kDa_ conserved site
NADH-ubiquinone oxidoreductase_ F subunit
NADP oxidoreductase_ coenzyme F420-dependent
NAGK-NAGSA_ bifunctional
Nascent polypeptide-associated complex_ alpha subunit
Neutral/alkaline nonlysosomal ceramidase
NGG1p interacting factor 3_ NIF3
NGP1_ N-terminal
Nicotinate phosphoribosyltransferase
Nicotinate phosphoribosyltransferase-like
Nicotinate phosphoribosyltransferase-related
Nicotinate-nucleotide pyrophosphorylase
NIF system FeS cluster assembly_ NifU_ C-terminal
NIF system FeS cluster assembly_ NifU_ N-terminal
NIF system FeS cluster assembly_ NifU-like scaffold_ N-terminal
NIPSNAP
Nitrite and sulphite reductase iron-sulphur/siroheme-binding site
Nitrite/sulphite reductase_ hemoprotein beta-component_ ferrodoxin-like
Nitrogen regulatory PII-like_ alpha/beta
NLE
NMD3
NmrA-like
NOG_ C-terminal
Nonsense-mediated decay UPF3
Non-SMC condensin subunit_ XCAP-D2/Cnd1
[truncated: 1,088 more rows]

## Sheet: Common-Gene expression datasets
R.placenta	R. placenta|W.cocos
2Fe-2S ferredoxin_ iron-sulfur binding site	Eukaryotic translation initiation factor SUI1
2OG-Fe(II) oxygenase superfamily	Flavodoxin-like
3-beta hydroxysteroid dehydrogenase/isomerase	Inorganic pyrophosphatase
AAA ATPase	Lipocalin-related protein and Bos/Can/Equ allergen
AAA ATPase_ central region	Octicosapeptide/Phox/Bem1p
ABC transporter	Parallel beta-helix repeat
Acyl-CoA dehydrogenase	Ribosomal protein L7Ae/L30e/S12e/Gadd45
Acyl-CoA dehydrogenase_ central region	Ribosomal protein S10
Acyl-CoA dehydrogenase_ C-terminal	RPEL repeat
Acyl-CoA dehydrogenase_ N-terminal	Translation initiation factor SUI1
Aflatoxin biosynthesis regulatory protein
Alpha-L-arabinofuranosidase_ C-terminal	R. placenta|C.puteana
Amidase	Amidohydrolase-like
Amidohydrolase	Beta-lactamase
Amino acid permease	GAF
ATP/GTP-binding site motif A (P-loop)	Helix-turn-helix_ Fis-type
ATPase_ E1-E2 type	Serine/threonine dehydratase_ pyridoxal-phosphate-binding site
ATP-dependent helicase_ DEAH-box	UbiE/COQ5 methyltransferase
Auxin Efflux Carrier
Bacterial extracellular solute-binding protein_ family 3	R. placenta|S.lacrymans
Bacterial sensor protein_ C-terminal	Argonaute and Dicer protein_ PAZ
Beta G-protein (transducin)	Catalase
BolA-like protein	Glycoside hydrolase_ family 71
C2	Stem cell self-renewal protein Piwi
Calcium-binding protein_ S-100/ICaBP type	TEA/ATTS
Carbohydrate kinase_ FGGY
Carbohydrate kinase_ PfkB	R. placenta|H.pinastri
Carbohydrate-binding domain_ family V/XII	Cyclin_ N-terminal
Caspase-1_ p20	Cytochrome c_ class I
Catechol dioxygenase_ N-terminal	Cytochrome c_ class IA/ IB
CBF/Mak21	Putative phosphatase regulatory subunit
CDP-alcohol phosphatidyltransferase
Citrate synthase	W.cocos|C.puteana
Cys/Met metabolism pyridoxal-phosphate-dependent enzymes	Alcohol dehydrogenase class III/S-(hydroxymethyl)glutathione dehydrogenase
Cytochrome b/b6_ N-terminal	Ammonium transporter
Cytochrome c heme-binding site	Epoxide hydrolase-like
DEAD/DEAH box helicase	Macrophage migration inhibitory factor
DEAD/DEAH box helicase_ N-terminal	PAS
DH	PAS fold-3
Dual specificity protein phosphatase	Rh-like protein/ammonium transporter
D-xylulose 5-phosphate/D-fructose 6-phosphate phosphoketolase	UTP--glucose-1-phosphate uridylyltransferase
Dystroglycan-type cadherin-like
E-class P450_ group I	W.cocos|S.lacrymans
E-class P450_ group IV	Biotin carboxylation region
EGF-like	Biotin-binding site
Emopamil-binding	Chitin synthase
Endoplasmic reticulum targeting sequence	Chitin synthase N-terminal
Enoyl-CoA hydratase/isomerase	Galactose-binding like
Esterase/lipase/thioesterase	Glycosyl hydrolase 92
FAD-binding	Histone H4
Ferric reductase-like transmembrane component	Isocitrate lyase
Filamentation induced by cAMP protein Fic	Phosphatidylserine decarboxylase
Flavin-containing monooxygenase FMO	Plastocyanin-like
Flavoprotein monooxygenase	Polyprenyl synthetase
FMN/related compound-binding core	Pyruvate kinase
Fungal G-protein_ alpha subunit	Rudiment single hybrid motif
Generic methyltransferase	Sterol-sensing 5TM box
Glutamate-cysteine ligase catalytic subunit	Thioredoxin domain
Glycoside hydrolase family 2_ immunoglobulin-like beta-sandwich domain	Thioredoxin-related
Glycoside hydrolase_ clan GH-D	Uncharacterised conserved protein UCP007663
Glycoside hydrolase_ family 18
Glycoside hydrolase_ family 27	W.cocos|H.pinastri
Glycoside hydrolase_ family 35	Calcium/proton exchanger superfamily
Glycoside hydrolase_ family 37	Carbohydrate-binding WSC
GMC oxidoreductase	CS
G-protein beta WD-40 repeat	Cupin 1
GTP cyclohydrolase I	Ferritin/ribonucleotide reductase-like
H+-transporting two-sector ATPase_ alpha/beta subunit_ central region	Flavocytochrome c
Haloacid dehalogenase/epoxide hydrolase	GNS1/SUR4 membrane protein
Heat shock factor (HSF)-type_ DNA-binding	Histone H2B
Helicase_ C-terminal	Histone H3
Histidine kinase	Pyruvate carboxyltransferase
Histidine kinase A_ N-terminal	Sodium/calcium exchanger membrane region
Histidine kinase_ HAMP region
HMG1/2 (high mobility group) box	C.puteana|S.lacrymans
HMG-CoA lyase-like	Copper amine oxidase_ N2-terminal
Hpt	Eukaryotic molybdopterin oxidoreductase
HSF/ETS_ DNA-binding	Ferric reductase-like transmembrane component_ N-terminal
Hydantoinase B/oxoprolinase	FMN-dependent alpha-hydroxy acid dehydrogenase_ active site
HypB/UreG_ nucleotide-binding	Glucosamine-fructose-6-phosphate aminotransferase_ isomerising
Hypoxia induced protein conserved region	Glycoside hydrolase-type carbohydrate-binding
Immunoglobulin/major histocompatibility complex	Glycosyl transferase_ family 28
Intradiol ring-cleavage dioxygenase	Isochorismatase hydrolase
IQ calmodulin-binding region	Isocitrate lyase and phosphorylmutase_ core
Isoflavone reductase	LamB/YcsF
KH	Moybdenum cofactor oxidoreductase_ dimerisation
KH_ type 1	Nucleobase cation symporter-1_ NCS1
Kinesin_ motor region	Oxidoreductase_ molybdopterin binding
Late embryogenesis abundant protein	Poly(ADP-ribose) polymerase_ catalytic region
Lipolytic enzyme	Protein of unknown function DUF6_ transmembrane
MAP kinase	Pyruvate/Phosphoenolpyruvate kinase_ catalytic core
N-6 Adenine-specific DNA methylase	Signal transduction response regulator_ pH-responsive_ PalI/Rim9
NAD-binding site	Sugar isomerase (SIS)
NADH:flavin oxidoreductase/NADH oxidase	Thiamine biosynthesis Thi4 protein
Neutral trehalase Ca2+ binding	Xanthine/uracil permease
Nuclear protein G9a	Xanthine/uracil/vitamin C permease
NULL
OsmC-like protein	C.puteana|H.pinastri
p38 MAP kinase	3-isopropylmalate dehydratase_ large subunit region
Paired amphipathic helix	3-isopropylmalate dehydratase_ small subunit region
PAP/25A core	Aconitase A/isopropylmalate dehydratase small subunit_ swivel
Parvalbumin	Aconitase/3-isopropylmalate dehydratase large subunit_ alpha/beta/alpha
Pectinesterase	Aconitase/3-isopropylmalate dehydratase_ swivel
Peptidase A1_ pepsin	Annexin
Peptidase C48_ SUMO/Sentrin/Ubl1	ATPase_ P-type cation exchange_ alpha subunit
Peptidase S16_ active site	Beta-glucan synthesis-associated_ SKN1
Peptidase S16_ ATP-dependent protease La	Carbohydrate-binding-like fold
Peptidase S16_ lon C-terminal	Glutamate dehydrogenase_ NAD-dependent
Peptidase S16_ lon protease	Glutamate/phenylalanine/leucine/valine dehydrogenase_ C-terminal
Peptidylprolyl isomerase_ FKBP-type	Glycoside hydrolase family 13
Permease for cytosine/purines_ uracil_ thiamine_	Glycoside hydrolase_ carbohydrate-binding
PPR repeat	Glyoxal oxidase_ N-terminal
Protein kinase	Lytic transglycosylase-like_ catalytic
Protein of unknown function DUF59	Peptidase_ cysteine peptidase active site
Protein of unknown function DUF92	Zinc finger_ RanBP2-type
Protein of unknown function UPF0031
Protein prenyltransferase_ alpha subunit	S.lacrymans|H.pinastri
Putative Ig	Activator of Hsp90 ATPase homologue 1-like
Pyridoxal-5'-phosphate-dependent enzyme_ beta subunit	Activator of Hsp90 ATPase_ N-terminal
Pyrokinin	Adenosine deaminase/editase
Pyruvate decarboxylase	Chaperone DnaJ_ C-terminal
RecA bacterial DNA recombination protein	Delta-9 acyl-CoA desaturase with haem/steroid binding region
Recoverin	D-isomer specific 2-hydroxyacid dehydrogenase_ catalytic region
Replication factor C conserved region	ERG4/ERG24 ergosterol biosynthesis protein
Response regulator receiver	Fatty acid desaturase_ type 1
Rhodopsin-like GPCR superfamily	Fatty acid desaturase_ type 1_ core
Ribosomal L28e protein	Fatty acid desaturase_ type 1_ C-terminal
Ribosomal L38e protein	Fatty acid desaturase_ type 1_ N-terminal
Ribosomal protein S12E	Glycoside hydrolase_ family 18_ N-terminal
Ribosomal protein S5	Glycoside hydrolase_ family 20
Ribosomal RNA methyltransferase RrmJ/FtsJ	Glycoside hydrolase_ family 20_ catalytic core
RNA-binding region RNP-1 (RNA recognition motif)	Heat shock protein DnaJ_ cysteine-rich region
SAM (and some other nucleotide) binding motif	Histone H1/H5
Small GTP-binding protein domain	HSP40/DnaJ peptide-binding
Sugar transporter superfamily	Mandelate racemase/muconate lactonizing enzyme_ N-terminal
TBP-interacting 120	Ribonuclease/ribotoxin
TonB box_ N-terminal	Thiamine pyrophosphate enzyme_ central region
TPR repeat	Thiamine pyrophosphate enzyme_ C-terminal TPP-binding
Tyrosine protein kinase_ active site	Thiamine pyrophosphate enzyme_ N-terminal TPP binding region
Tyrosine specific protein phosphatase	Uncharacterised conserved protein UCP014753
Tyrosine specific protein phosphatase and
Tyrosine specific protein phosphatase and dual specificity	R. placenta|W.cocos|H.pinastri
Ubiquitin system component Cue	Adenine nucleotide translocator 1
Ubiquitin-conjugating enzymes
Universal stress protein (Usp)	R. placenta|C.puteana|S.lacrymans
Urease accessory protein UreG	Glutamine amidotransferase_ class-II
UspA	Glycoside hydrolase_ family 47
UV-endonuclease UvdE	Lipase_ active site
Vitamin K-dependent carboxylation/gamma-carboxyglutamic region	Tetrapeptide transporter_ OPT1/isp4
Zinc-containing alcohol dehydrogenase
Zinc-containing alcohol dehydrogenase superfamily	R. placenta|S.lacrymans|H.pinastri
Zn-finger_ C2H2 type	2-nitropropane dioxygenase_ NPD
Zn-finger_ CCHC type	Glycoside hydrolase_ family 1
Zn-finger_ C-x8-C-x5-C-x3-H type	Glycoside hydrolase_ family 16
Zn-finger_ GATA type	Homeobox
Zn-finger_ MYND type	UbiA prenyltransferase
Zn-finger-like_ PHD finger
	W.cocos|C.puteana|S.lacrymans
W.cocos	Amidohydrolase 3
2-nitropropane dioxygenase_ NPD	Aquaporin
3-hydroxyisobutyrate dehydrogenase-related_ conserved site	BCS1 N terminal
3-oxoacid CoA-transferase	Carbohydrate-binding family V/XII
3-oxoacid CoA-transferase_ subunit A	Dihydroxy-acid and 6-phosphogluconate dehydratase
3-oxoacid CoA-transferase_ subunit B	Dihydroxy-acid dehydratase
5-methyltetrahydropteroyltriglutamate--homocysteine S-methyltransferase	Dynamin central region
5'-Nucleotidase_ conserved site	FAD-binding 8
6-phosphogluconate dehydrogenase	FMN-dependent alpha-hydroxy acid dehydrogenase
6-phosphogluconate dehydrogenase_ C-terminal	HpcH/HpaI aldolase
6-phosphogluconate dehydrogenase_ C-terminal-like	Isocitrate lyase and phosphorylmutase
6-phosphogluconate dehydrogenase_ decarboxylating	Major intrinsic protein
6-phosphogluconate dehydrogenase_ NAD-binding	Peptidase S28
6-phosphogluconate-binding site	Peptidoglycan-binding LysM
AAA ATPase_ conserved site	Ribonuclease T2
AAA ATPase_ core	Ricin B-related lectin
AAA+ ATPase_ core
ABC transporter_ transmembrane region	W.cocos|C.puteana|H.pinastri
ABC transporter_ transmembrane region_ type 1	Region of unknown function DUF1929
AB-hydrolase YheT_ putative
Acetohydroxy acid isomeroreductase_ catalytic	W.cocos|S.lacrymans|H.pinastri
Actin/actin-like	Alternative oxidase
Actin_ conserved site	Beta-N-acetylhexosaminidase-like
Actin-binding_ cofilin/tropomyosin type	Biotin/lipoyl attachment
Acyl-CoA dehydrogenase/oxidase_ central region	CS domain
Acyl-CoA dehydrogenase/oxidase_ middle and N-terminal	Glutamate decarboxylase
Acyl-CoA dehydrogenase_ conserved site	Heat shock protein Hsp20
Acyl-CoA oxidase/dehydrogenase_ type 1	Heat shock protein Hsp70
Acyl-CoA-binding protein_ ACBP	Heat shock protein Hsp90
Adenosine/AMP deaminase active site	HSP20-like chaperone
Adenylylsulphate kinase_ C-terminal	Protein of unknown function DUF1479
Alcohol dehydrogenase_ zinc-binding	Protein of unknown function DUF250
Alcohol dehydrogenase_ zinc-containing_ conserved site	Pyridoxal phosphate-dependent decarboxylase
Aldehyde dehydrogenase_ conserved site	Pyruvate decarboxylase/indolepyruvate decarboxylase
Alkyl hydroperoxide reductase/ Thiol specific antioxidant/ Mal allergen	Single hybrid motif
Alpha tubulin
Alpha-1_2-mannosidase_ putative	C.puteana|S.lacrymans|H.pinastri
Alpha-amylase_ domain of unknown function DUF1966_ C-terminal	Acetamidase/Formamidase
Alpha-amylase_ fungi	Alpha-amylase_ C-terminal all beta
Alpha-D-phosphohexomutase_ alpha/beta/alpha domain I	Amino acid adenylation
Alpha-D-phosphohexomutase_ alpha/beta/alpha domain II	Condensation domain
Alpha-D-phosphohexomutase_ alpha/beta/alpha domain III	Copper amine oxidase
Alpha-D-phosphohexomutase_ alpha/beta/alpha I_ II and III	Copper amine oxidase_ C-terminal
Alpha-D-phosphohexomutase_ conserved site	Copper amine oxidase_ N-terminal region
Alpha-D-phosphohexomutase_ C-terminal	Dynamin_ GTPase region
Alpha-D-phosphohexomutase_ N-terminal	Fungal hydrophobin
Alpha-hydroxy acid dehydrogenase_ FMN-dependent	Glycoside hydrolase_ family 18_ catalytic domain
Alpha-L-arabinofuranosidase_ C-terminal	Glycoside hydrolase_ family 30
Amidase_ fungi type	Glycosyl hydrolase_ family 13_ catalytic region
Amino acid permease_ conserved site	Glycosyl hydrolase_ family 13_ subfamily_ catalytic region
Amino acid transporter_ transmembrane	Homoserine acetyltransferase
Aminoacyl-tRNA synthetase_ class I_ conserved site	Mandelate racemase/muconate lactonizing enzyme_ C-terminal
Aminotransferase_ class I and II	Multicopper oxidase_ type 2
Aminotransferase_ class IV	Multicopper oxidase_ type 3
Aminotransferase_ class-II_ pyridoxal-phosphate binding site	NADH:flavin oxidoreductase/NADH oxidase_ N-terminal
Aminotransferases_ class-I_ pyridoxal-phosphate-binding site	Peptidase S10_ serine carboxypeptidase
ArgE/DapE/ACY1/CPG2/YscS_ conserved site	Potassium channel_ voltage-dependent_ beta subunit_ KCNAB-related
Aspartate/other aminotransferase	Protein of unknown function DUF895_ eukaryotic
ATPase_ P-type cation-transporter_ C-terminal	Thaumatin_ pathogenesis-related
ATPase_ P-type cation-transporter_ N-terminal	Thioesterase
ATPase_ P-type_ K/Mg/Cd/Cu/Zn/Na/Ca/Na/H-transporter	Zinc/iron permease
ATP-binding region_ ATPase-like	Zinc/iron permease_ fungal and plant
ATP-citrate lyase/succinyl-CoA ligase
ATP-citrate lyase/succinyl-CoA ligase_ active site	R. placenta|W.cocos|C.puteana|S.lacrymans
ATP-sulphurylase	GPR1/FUN34/yaaH
AT-rich interaction region
Bacterial regulatory protein_ LuxR	R. placenta|W.cocos|C.puteana|H.pinastri
Beta tubulin	Beta-lactamase-like
Beta tubulin_ autoregulation binding site
Beta-glucan synthesis-associated_ SKN1	R. placenta|W.cocos|S.lacrymans|H.pinastri
Beta-ketoacyl synthase_ C-terminal	Chloroperoxidase
Beta-ketoacyl synthase_ N-terminal	Phosphatidylserine decarboxylase-related
Bicupin_ oxalate decarboxylase/oxidase	Thiolase
Biotin carboxylase_ C-terminal
bZIP transcription factor_ bZIP-1	R. placenta|C.puteana|S.lacrymans|H.pinastri
C4-dicarboxylate transporter/malic acid transport protein	Aminotransferase_ class I and II
Calcium/proton exchanger	Chitinase II
Calcium-translocating P-type ATPase_ PMCA-type	Glycoside hydrolase_ chitinase active site
Calreticulin/calnexin	Glycoside hydrolase_ family 5
Calreticulin/calnexin_ P	Lipase_ class 3
Calycin-like	Multicopper oxidase_ copper-binding site
cAMP-regulated phosphoprotein/endosulphine conserved region	Multicopper oxidase_ type 1
Carbamoyl phosphate synthase_ large subunit_ N-terminal	Permease for cytosine/purines_ uracil_ thiamine_ allantoin
Carbamoyl phosphate synthetase_ large subunit_ ATP-binding
Carbohydrate kinase_ FGGY	W.cocos|C.puteana|S.lacrymans|H.pinastri
Carbohydrate/puine kinase_ PfkB_ conserved site	Cupredoxin
Carbohydrate-binding WSC_ subgroup	Dynamin GTPase effector
Carboxylesterase_ type B	Heat shock protein 70
Carboxymuconolactone decarboxylase	Methyltransferase type 12
Catechol dioxygenase_ N-terminal
Chitin-binding_ type 1	R. placenta|W.cocos|C.puteana|S.lacrymans|H.pinastri
CoA-binding	GroES-related
Cobalamin (vitamin B12)-independent methionine synthase MetE_ N-terminal	Isoprenylcysteine carboxyl methyltransferase
Coenzyme A transferase	Mandelate racemase/muconate lactonizing enzyme
Complex 1 LYR protein	Polysaccharide deacetylase
Conserved carboxylase region	RTA1 like protein
Conserved hypothetical protein CHP02231
Crotonase_ core	H.pinastri|F.radiculos
Cullin homology	6-phosphogluconate dehydrogenase_ C-terminal-like
Cupin 2_ conserved barrel	ArgE/DapE/ACY1/CPG2/YscS_ conserved site
Cupin_ RmlC-type	Band 7 protein
Cyanamide hydratase_ HD-type	Chaperonin Cpn60
Cytochrome b-245_ heavy chain	Chaperonin Cpn60/TCP-1
Cytochrome c and b562	Citrate synthase-like
Cytochrome c_ class I	Citrate synthase-like_ core
Cytochrome c_ class IA/ IB	Cupin_ RmlC-type
Cytochrome c_ monohaem	Cyclophilin-like
Cytochrome P450_ E-class_ group I	Cys/Met metabolism_ pyridoxal phosphate-dependent enzyme
Cytochrome P450_ E-class_ group IV	Double-stranded RNA binding
Delta-1-pyrroline-5-carboxylate dehydrogenase 1	E3 binding
D-isomer specific 2-hydroxyacid dehydrogenase_ catalytic region	Forkhead-associated
D-isomer specific 2-hydroxyacid dehydrogenase_ NAD-binding	GroEL-like chaperone_ ATPase
Dopa 4_5-dioxygenase	H+ transporting ATPase_ proton pump
Dullard-like phosphatase domain	High mobility group box_ HMG
Dynamin_ GTPase region	High mobility group box_ HMG1/HMG2
Dynein light chain_ type 1 and 2	Histone H2A
E3 ubiquitin ligase_ SCF complex_ Skp subunit	Immunoglobulin/major histocompatibility complex_ conserved site
EGF-like region_ conserved site	L-Aspartase-like
Electron transfer flavoprotein_ alpha subunit	Natural resistance-associated macrophage protein
Electron transfer flavoprotein_ alpha subunit_ C-terminal	Peptidyl-prolyl cis-trans isomerase_ cyclophilin-type
Electron transfer flavoprotein_ alpha/beta-subunit_ N-terminal	Protein kinase ATP binding_ conserved site
Elongation factor G_ III and V	RNA helicase_ ATP-dependent_ DEAD-box_ conserved site
Endoribonuclease L-PSP	SMAD/FHA domain
Endoribonuclease L-PSP/chorismate mutase-like	Sodium/hydrogen exchanger
Enolase	Whey acidic protein_ 4-disulphide core
Esterase_ SGNH hydrolase-type
Eukaryotic initiation factor 1A (eIF-1A)	S.lacrymans|F.radiculos
Eukaryotic initiation factor 5A hypusine (eIF-5A)	AB-hydrolase YheT_ putative
Extracellular membrane protein_ 8-cysteine region_ CFEM	Acetate--CoA ligase
Extracellular membrane protein_ 8-cysteine region_ fungi	Actin-crosslinking proteins
FAD-binding_ type 1	Aspartate/ornithine carbamoyltransferase_ Asp/Orn-binding region
Fatty acid desaturase_ type 1	Aspartate/ornithine carbamoyltransferase_ carbamoyl-P binding
Fatty acid desaturase_ type 1_ N-terminal	Bromo adjacent region
Ferric reductase_ NAD binding	Carbamoyl phosphate synthase_ large subunit_ N-terminal
Ferric reductase-like transmembrane component_ N-terminal	Cyclin-related 2
FMN-dependent alpha-hydroxy acid dehydrogenase_ active site	DNA/RNA helicase_ DEAD/DEAH box type_ N-terminal
Formate/nitrite transporter	Helicase_ superfamily 1_ UvrD-related
Fructose-bisphosphate aldolase_ class II_ yeast/E. coli subtype	HMG-I and HMG-Y_ DNA-binding
Fumarate reductase/succinate dehydrogenase flavoprotein_ N-terminal	MaoC-like dehydratase
Fungal fruit body lectin	Multi antimicrobial extrusion protein MatE
Fungal G-protein_ alpha subunit	Myb_ DNA-binding
Fungal transcriptional regulatory protein_ N-terminal	Peptidase S9_ prolyl oligopeptidase active site region
G protein alpha subunit_ helical insertion	Polynucleotidyl transferase_ Ribonuclease H fold
Galactose oxidase/kelch_ beta-propeller	Prefoldin
Germin	Protein-tyrosine phosphatase
Globin-like	Pyrokinin_ conserved site
Glucose-methanol-choline oxidoreductase_ C-terminal	RabGAP/TBC
Glucose-methanol-choline oxidoreductase_ N-terminal	Rhodanese-like
Glutaredoxin	Ribonuclease III
Glutaredoxin active site	RNA recognition motif_ RNP-1
Glutaredoxin subgroup	Tetracycline resistance protein_ TetA
Glutaredoxin_ eukaryotic and viruses	Tetratricopeptide TPR2
Glutaredoxin-related protein	Ubiquitin-conjugating enzyme_ E2
Glutathione degradosome_ DUG1
Glutathione S-transferase_ C-terminal	S.lacrymans|H.pinastri|F.radiculos
Glutathione S-transferase_ C-terminal-like	Aminoacyl-tRNA synthetase_ class 1a_ anticodon-binding
Glutathione S-transferase_ N-terminal	ATPase AAA-2
Glycerol kinase	Beta-Ig-H3/fasciclin
Glycogen/starch/alpha-glucan phosphorylase	Beta-ketoacyl synthase_ C-terminal
Glycoside hydrolase family 2_ immunoglobulin-like beta-sandwich	Beta-ketoacyl synthase_ N-terminal
Glycoside hydrolase/deacetylase_ beta/alpha-barrel	Carbamoyl phosphate synthetase_ large subunit_ ATP-binding
Glycoside hydrolase_ 48F	Chaperonin clpA/B
Glycoside hydrolase_ catalytic core	Clp_ N-terminal
Glycoside hydrolase_ chitinase active site	Cyclin-like
Glycoside hydrolase_ clan GH-D	DEAD-like helicase_ N-terminal
Glycoside hydrolase_ family 10	DNA/RNA helicase_ C-terminal
Glycoside hydrolase_ family 12	Heat shock protein DnaJ
Glycoside hydrolase_ family 16	Helicase_ superfamily 1 and 2_ ATP-binding
Glycoside hydrolase_ family 18_ catalytic domain	Homeodomain-like
Glycoside hydrolase_ family 20	Malonyl-CoA ACP transacylase_ ACP-binding
Glycoside hydrolase_ family 20_ catalytic core	Polyketide synthase_ KR
Glycoside hydrolase_ family 27	SNF2-related
Glycoside hydrolase_ family 28	Tetratricopeptide region
Glycoside hydrolase_ family 3_ C-terminal	Tetratricopeptide TPR-1
Glycoside hydrolase_ family 3_ N-terminal	Zinc finger_ C6HC-type
Glycoside hydrolase_ family 30	Zinc finger_ FYVE/PHD-type
Glycoside hydrolase_ family 31	Zinc finger_ PHD-type
Glycoside hydrolase_ family 47	Zinc finger_ RING-type
Glycoside hydrolase_ family 5
Glycosyl hydrolase_ family 13_ catalytic region	C.puteana|F.radiculos
Glycosyl hydrolase_ family 13_ subfamily_ catalytic region	3-hydroxyacyl-CoA dehydrogenase_ NAD binding
Glycosyl transferase_ family 35	C2 calcium/lipid-binding region_ CaLB
Glycosyl transferase_ group 1	C2 calcium-dependent membrane targeting
Glyoxal oxidase_ N-terminal	CheY-like
GPCR_ rhodopsin-like	Ctr copper transporter
G-protein_ beta subunit	Dehydrogenase_ E1 component
G-protein_ gamma subunit	Endonuclease/exonuclease/phosphatase
G-protein_ gamma-like subunit	EVH1
Guanine nucleotide binding protein (G-protein)_ alpha subunit	G protein alpha subunit_ helical insertion
Guanine nucleotide-binding protein_ beta subunit	Glyoxalase I
H+ transporting ATPase_ proton pump	Glyoxalase/bleomycin resistance protein/dioxygenase
Haem peroxidase_ animal	GTP-binding protein_ HSR1-related
Haem peroxidase_ plant/fungal/bacterial	Lambda repressor-like_ DNA-binding
Helix-turn-helix_ AraC type	Na+/solute symporter
High mobility group box_ HMG	Nucleic acid binding_ OB-fold_ tRNA/helicase-type
High mobility group box_ HMG1/HMG2	O-methyltransferase_ family 2
Histidine acid phosphatase_ eukaryotic	Patatin
Hydroxymethylglutaryl-CoA reductase_ class I/II_ catalytic	Phosphatidylethanolamine-binding protein PEBP
Hydroxymethylglutaryl-CoA reductase_ class I/II_ NAD/NADP-binding	Pleckstrin-like
Hydroxymethylglutaryl-CoA reductase_ class I/II_ substrate-binding	Proline dehydrogenase
Hydroxymethylglutaryl-CoA reductase_ class I_ catalytic	RNA polymerase sigma factor 54_ interaction
Intradiol ring-cleavage dioxygenase_ core	Signal transduction response regulator_ receiver region
Intradiol ring-cleavage dioxygenase_ C-terminal	Transaldolase
Isocitrate lyase and phosphorylmutase_ core	Transketolase_ central region
Isopentenyl-diphosphate delta-isomerase
Isopentenyl-diphosphate delta-isomerase_ type 1	C.puteana|H.pinastri|F.radiculos
K Homology_ prokaryotic type	Amino acid permease_ conserved site
K Homology_ type 2	Amino acid transporter_ transmembrane
Ketose-bisphosphate aldolase_ class-II	ATPase_ P-type cation-transporter_ C-terminal
KOW	ATPase_ P-type cation-transporter_ N-terminal
Lactate dehydrogenase/glycoside hydrolase_ family 4_ C-terminal	ATPase_ P-type_ K/Mg/Cd/Cu/Zn/Na/Ca/Na/H-transporter
Lactate/malate dehydrogenase	Fumarate reductase/succinate dehydrogenase flavoprotein_ N-terminal
Lambda repressor-like_ DNA-binding	Galactose oxidase/kelch_ beta-propeller
Legume lectin_ beta domain	Heterokaryon incompatibility
Light chain 3 (LC3)	Peptidase M20_ dimerisation
Lipase_ GDXG_ active site	Tetracycline resistance protein_ TetB
L-lactate/malate dehydrogenase	TGF-beta receptor_ type I/II extracellular region
Lysophospholipase_ catalytic region	Zinc finger_ CCCH-type
Malate dehydrogenase_ active site
Malate dehydrogenase_ NAD-dependent_ eukaryotes and gamma proteobacteria	C.puteana|S.lacrymans|F.radiculos
Male sterility_ NAD-binding	AAA ATPase_ conserved site
Malonyl-CoA ACP transacylase_ ACP-binding	ABC transporter_ transmembrane region_ type 1
Mandelate racemase/muconate lactonizing enzyme_ C-terminal	Amidohydrolase 1
Mandelate racemase/muconate lactonizing enzyme_ N-terminal	Aminotransferase_ class V/Cysteine desulphurase
MD-2-related lipid-recognition	Arginase
Metal-dependent hydrolase_ composite	Glucose-methanol-choline oxidoreductase_ C-terminal
Metal-dependent phosphohydrolase_ HD region_ subdomain	Glucose-methanol-choline oxidoreductase_ N-terminal
Methionine synthase_ vitamin-B12 independent	GPCR_ rhodopsin-like
Mitochondrial ATPase inhibitor_ IATP	Haem peroxidase_ animal
Mog1/PsbP/DUF1795_ alpha/beta/alpha sandwich	Malic enzyme_ conserved site
Monooxygenase_ FAD-binding	Malic enzyme_ NAD-binding
Mss4-like	Malic enzyme_ N-terminal
Multicopper oxidase_ copper-binding site	Malic oxidoreductase
Multicopper oxidase_ type 1	Metal-dependent hydrolase_ composite
Multicopper oxidase_ type 2	NAD-dependent epimerase/dehydratase
Multicopper oxidase_ type 3	Peptidase T2_ asparaginase 2
Multiprotein bridging factor 1_ N-terminal	TonB box_ conserved site
Neutral/alkaline nonlysosomal ceramidase	Ureohydrolase
NOSIC
NUC153	C.puteana|S.lacrymans|H.pinastri|F.radiculos
Nucleic acid-binding_ OB-fold-like	AAA ATPase_ core
Nucleoside diphosphate kinase_ core	AAA+ ATPase_ core
NUDIX hydrolase_ core	Alcohol dehydrogenase_ zinc-binding
Oxidoreductase_ N-terminal	Alcohol dehydrogenase_ zinc-containing_ conserved site
PA14	Aldehyde dehydrogenase_ conserved site
PCI/PINT associated module	Alpha/beta hydrolase fold-3
Peptidase aspartic_ active site	Amidase_ fungi type
Peptidase aspartic_ catalytic	Aminoacyl-tRNA synthetase_ class I_ conserved site
Peptidase C14_ caspase catalytic	Berberine/berberine-like
Peptidase M20_ dimerisation	Cytochrome P450_ E-class_ group I
Peptidase M28	Cytochrome P450_ E-class_ group IV
Peptidase S33_ proline iminopeptidase 1	Esterase_ SGNH hydrolase-type
Peptidase S33_ prolyl aminopeptidase	FAD dependent oxidoreductase
Peptidase S33_ tricorn interacting factor 1	FAD linked oxidase_ N-terminal
Peptidase S53_ propeptide	FAD-binding_ type 2
Peptidase S8 and S53_ subtilisin_ kexin_ sedolisin	Glutathione S-transferase_ C-terminal-like
Peptidase S9_ prolyl oligopeptidase active site region	Glycoside hydrolase_ catalytic core
Peptidase S9_ serine active site	Glycoside hydrolase/deacetylase_ beta/alpha-barrel
Peptidase S9A_ oligopeptidase_ N-terminal beta-propeller	Lipase_ GDSL
Peptidase S9A_ prolyl oligopeptidase	Male sterility_ NAD-binding
Phosphoesterase	Methyltransferase type 11
Phosphoglucose isomerase (PGI)	Peptidase aspartic_ catalytic
Phosphoglycerate kinase	Peptidase S53_ propeptide
Phosphoglycerate kinase_ conserved site	Protein kinase_ core
Phosphotransferase system_ HPr serine phosphorylation site	Proteinase inhibitor_ propeptide
Plectin/S10_ N-terminal	Pyridine nucleotide-disulphide oxidoreductase_ NAD-binding region
Plus-3	Pyridoxal phosphate-dependent transferase_ major region
Polyketide synthase_ KR	Sugar transporter_ conserved site
Porin_ eukaryotic type	Zinc finger_ C2H2-like
Potassium channel_ voltage-dependent_ beta subunit_ KCNAB-related	Zinc finger_ C2H2-type
Predicted phosphoesterase_ C1039.02 type	Zinc finger_ MYND-type
Pre-mRNA processing ribonucleoprotein_ binding region
Profilin/allergen	W.cocos|F.radiculos
Profilin_ plant	14-3-3 protein
Protein kinase ATP binding_ conserved site	ADP-ribosylation factor
Protein kinase_ core	ARF/SAR superfamily
Protein of unknown function DM9	Bacterial alpha-L-rhamnosidase
Protein of unknown function DUF124	Branched-chain amino acid aminotransferase II
Protein of unknown function DUF1348	Cell division/GTP binding protein
Protein of unknown function DUF1772_ fungi	Chromo domain
Protein of unknown function DUF1960	Chromo domain-like
Protein of unknown function DUF537	Glycerol dehydrogenase
Protein of unknown function DUF701_ zinc-binding putative	GTP-binding protein SAR1
Protein of unknown function DUF895_ eukaryotic	Heat shock protein 9/12
Protein of unknown function DUF907_ fungi	Helix-loop-helix DNA-binding
Protein of unknown function UPF0187	Helix-turn-helix type 3
Protein synthesis factor_ GTP-binding	Iron-containing alcohol dehydrogenase
Proteinase inhibitor I25_ cystatin	Manganese and iron superoxide dismutase
Proteinase inhibitor I9_ subtilisin propeptide	Mov34/MPN/PAD-1
Proteinase inhibitor_ propeptide	Mov34-1
PUA-like	NLI interacting factor
Putative esterase	NUDIX
Pyridine nucleotide-disulphide oxidoreductase_ class I	Plant ascorbate peroxidase
Pyridine nucleotide-disulphide oxidoreductase_ NAD-binding region	Proteasome component region PCI
Pyridoxal phosphate-dependent transferase_ major region	Ran GTPase
Pyruvate carboxylase	Ribosomal protein L15
Pyruvate kinase_ alpha/beta	Ribosomal protein L18ae
Pyruvate kinase_ barrel	Ribosomal protein L27e
Pyruvate kinase_ beta-barrel-like	Ribosomal protein L29
Pyruvate kinase_ C-terminal-like	Ribosomal protein L6
Pyruvate/Phosphoenolpyruvate kinase_ catalytic core	Ribosomal protein S12/S23
Quinoprotein amine dehydrogenase_ beta chain-like	Ribosomal protein S6e
Ran-interacting Mog1 protein	SET
Ras small GTPase_ Rab type	t-SNARE
Ras small GTPase_ Ras type
Ras small GTPase_ Rho type	W.cocos|H.pinastri|F.radiculos
Redoxin	Di-copper centre-containing
Rhodopsin_ bacterial	Histone core
Ribosomal protein 60S	Histone-fold
Ribosomal protein L1	Plasma-membrane proton-efflux P-type ATPase
Ribosomal protein L10	Target SNARE coiled-coil region
Ribosomal protein L10e	Tyrosinase
Ribosomal protein L10e/L16	WD40 repeat-like
Ribosomal protein L11
Ribosomal protein L13	W.cocos|S.lacrymans|F.radiculos
Ribosomal protein L13_ eukaryotic/archaeal	ABC-2 type transporter
Ribosomal protein L14	Acyl-CoA dehydrogenase/oxidase C-terminal
Ribosomal protein L14b/L23e	Armadillo-type fold
Ribosomal protein L15e	Aspartate/ornithine carbamoyltransferase
Ribosomal protein L18/L5	ATP-grasp fold
Ribosomal protein L18e	Dimeric alpha-beta barrel
Ribosomal protein L19/L19e	PreATP-grasp-like fold
Ribosomal protein L21e	Ribosomal protein S15
Ribosomal protein L22/L17	Ribosomal protein S7
Ribosomal protein L22/L17_ eukaryotic/archaeal	Src homology-3
Ribosomal protein L22e	Ubiquitin-conjugating enzyme/RWD-like
Ribosomal protein L23/L15e_ core	WW/Rsp5/WWP
Ribosomal protein L23/L25_ N-terminal
Ribosomal protein L23_ conserved site	W.cocos|S.lacrymans|H.pinastri|F.radiculos
Ribosomal protein L24/L26_ conserved site	Acyl transferase
Ribosomal protein L25/L23	Lipocalin
Ribosomal protein L26_ eukaryotic/archaeal	Orn/DAP/Arg decarboxylase 2
Ribosomal protein L28e	Pectin lyase fold/virulence factor
Ribosomal protein L29e	Thiolase-like
Ribosomal protein L3	Translation protein SH3-like
Ribosomal protein L30_ core
Ribosomal protein L30_ C-terminal	W.cocos|C.puteana|F.radiculos
Ribosomal protein L30_ N-terminal	BTB/POZ fold
Ribosomal protein L30e	BTB/POZ-like
Ribosomal protein L31e	Ras
Ribosomal protein L32e	Small GTP-binding protein
Ribosomal protein L34e
Ribosomal protein L35Ae	W.cocos|C.puteana|H.pinastri|F.radiculos
Ribosomal protein L36e	Dihydrodipicolinate synthetase
Ribosomal protein L37ae	E1-E2 ATPase-associated region
Ribosomal protein L38e	Peptidase M20
Ribosomal protein L39e	Saccharopine dehydrogenase
Ribosomal protein L4/L1e	WD40 repeat
Ribosomal protein L4/L1e_ eukaryotic/archaeal_ conserved site
Ribosomal protein L44e	W.cocos|C.puteana|S.lacrymans|F.radiculos
Ribosomal protein L5	2OG-Fe(II) oxygenase
Ribosomal protein L5_ eukaryotic	Dienelactone hydrolase
Ribosomal protein L6E	Haem peroxidase
Ribosomal protein L7_ eukaryotic	NADH:cytochrome b5 reductase (CBR)
Ribosomal protein L7A	NmrA-like
Ribosomal protein L7Ae	Oxidoreductase FAD-binding region
Ribosomal protein S10_ eukaryotic/archaeal
Ribosomal protein S11	W.cocos|C.puteana|S.lacrymans|H.pinastri|F.radiculos
Ribosomal protein S13	ABC transporter-like
Ribosomal protein S13/S15_ N-terminal	Acyl carrier protein-like
Ribosomal protein S13-like_ H2TH	Acyl transferase/acyl hydrolase/lysophospholipase
Ribosomal protein S15_ eukaryotic/archaeal	Acyl-CoA N-acyltransferase
Ribosomal protein S17	Alcohol dehydrogenase GroES-like
Ribosomal protein S17e	Aldehyde/histidinol dehydrogenase
Ribosomal protein S19/S15	Alpha/beta hydrolase fold-1
Ribosomal protein S19e	Amidase signature enzyme
Ribosomal protein S21e	Barwin-related endoglucanase
Ribosomal protein S23_ eukaryotic/archaeal	Cerato-platanin
Ribosomal protein S24e	Concanavalin A-like lectin/glucanase
Ribosomal protein S26e	Fungal pheromone STE3 GPCR
Ribosomal protein S27a	GroES-like
Ribosomal protein S28e	Immunoglobulin E-set
Ribosomal protein S3_ C-terminal	Major facilitator superfamily MFS-1
Ribosomal protein S3_ eukaryotic/archaeal	MFS general substrate transporter
Ribosomal protein S30	Mitochondrial carrier protein
Ribosomal protein S3Ae	NAD(P)-binding
Ribosomal protein S4	Peptidase A1
Ribosomal protein S4/S9_ eukaryotic/archaeal	Pheromone B alpha-1 receptor
Ribosomal protein S4e	Protein kinase-like
Ribosomal protein S4e_ central	Rare lipoprotein A
Ribosomal protein S4e_ N-terminal	Serine/threonine protein kinase-related
Ribosomal protein S4e_ N-terminal and RNA-binding	Six-hairpin glycosidase-like
Ribosomal protein S5_ C-terminal	Terpenoid synthase
Ribosomal protein S5_ eukaryotic/archaeal	Thioredoxin-like fold
Ribosomal protein S5_ N-terminal
Ribosomal protein S6_ eukaryotic	R. placenta|F.radiculos
Ribosomal protein S7_ eukaryotic/archaeal	ATP-dependent DNA ligase
Ribosomal protein S8e	BRCT
Ribosomal protein S9	Haem peroxidase_ plant/fungal/bacterial
Ribosomal protein_ zinc-binding	Protein kinase_ C-terminal
Rieske iron-sulphur protein_ C-terminal	RhoGAP
RNA polymerase sigma factor 54_ interaction	Ribosomal protein S2
RNA recognition motif_ RNP-1	Ribosomal protein S5_ C-terminal
RNA-binding S4	Smr protein/MutS2 C-terminal
S1_ IF1 type	Tannase and feruloyl esterase
S15/NS1_ RNA-binding
S-adenosyl-L-homocysteine hydrolase	R. placenta|H.pinastri|F.radiculos
S-adenosyl-L-homocysteine hydrolase_ NAD binding	Glycoside hydrolase_ family 28
Septin	Serine/threonine protein kinase_ active site
Serine/threonine protein kinase_ active site
S-formylglutathione hydrolase	R. placenta|S.lacrymans|F.radiculos
SFT2-like	Cyclopropane-fatty-acyl-phospholipid synthase
Signal transduction response regulator_ pH-responsive_ PalI/Rim9	Gamma-glutamyltranspeptidase
SKP1 component	Glycoside hydrolase_ family 16_ active site
SKP1 component_ dimerisation	Glycoside hydrolase_ family 31
SKP1 component_ POZ	Monooxygenase_ FAD-binding
SNARE associated Golgi protein	Oxidoreductase_ C-terminal
Starch synthase catalytic region	Pyridine nucleotide-disulphide oxidoreductase_ class I
Succinyl-CoA ligase_ alpha subunit
Succinyl-CoA synthetase-like	R. placenta|S.lacrymans|H.pinastri|F.radiculos
Sugar transporter_ conserved site	D-isomer specific 2-hydroxyacid dehydrogenase_ NAD-binding
Survival protein SurE-like phosphatase/nucleotidase	Glycoside hydrolase_ family 3_ C-terminal
Syntaxin_ N-terminal	Glycoside hydrolase_ family 3_ N-terminal
TB2/DP1 and HVA22 related protein	Heat shock protein DnaJ_ N-terminal
Tetrapeptide transporter_ OPT1/isp4	Iron permease FTR1
Tetrapyrrole biosynthesis_ 5-aminolevulinic acid synthase	Oxidoreductase_ N-terminal
Thaumatin_ pathogenesis-related
Thiamine pyrophosphate enzyme_ central region	R. placenta|C.puteana|F.radiculos
Thiamine pyrophosphate enzyme_ C-terminal TPP-binding	BTB/POZ
Thiamine pyrophosphate enzyme_ N-terminal TPP binding region	Guanine nucleotide binding protein (G-protein)_ alpha subunit
Thioredoxin	Ras small GTPase_ Rab type
Thioredoxin-like	Ras small GTPase_ Ras type
TonB box_ conserved site	Ras small GTPase_ Rho type
Transketolase_ central region
Transketolase_ C-terminal	R. placenta|C.puteana|H.pinastri|F.radiculos
Transketolase_ C-terminal/Pyruvate-ferredoxin oxidoreductase_ domain II	Carboxylesterase_ type B
Transketolase_ N-terminal	Peptidase M_ neutral zinc metallopeptidases_ zinc-binding site
Translation elongation and initiation factors/Ribosomal_ beta-barrel	Terpene synthase_ metal-binding
Translation elongation factor EF1B_ beta and delta chains_ guanine nucleotide exchange
Translation elongation factor EF1B_ beta/delta chains_ conserved site	R. placenta|C.puteana|S.lacrymans|F.radiculos
Translation elongation factor EF1B_ gamma chain_ conserved	ABC transporter_ transmembrane region
Translation elongation factor EFG/EF2_ C-terminal
Translation elongation factor EFG/EF2_ domain IV	R. placenta|C.puteana|S.lacrymans|H.pinastri|F.radiculos
Translation elongation factor EFTu/EF1A_ domain 2	ATP-binding region_ ATPase-like
Translation machinery associated TMA7	Fungal transcriptional regulatory protein_ N-terminal
Translationally controlled tumour-associated TCTP	GCN5-related N-acetyltransferase
Triosephosphate isomerase	Glutathione S-transferase_ C-terminal
Tryptophan RNA-binding attenuator protein-like	Glutathione S-transferase_ N-terminal
Tubulin	Peptidase aspartic_ active site
Tubulin/FtsZ_ C-terminal	Peptidase S8 and S53_ subtilisin_ kexin_ sedolisin
Tubulin/FtsZ_ GTPase	Regulator of chromosome condensation_ RCC1
Ubiquitin-conjugating enzyme_ E2
Uncharacterised conserved protein UCP028846	R. placenta|W.cocos|F.radiculos
UTP--glucose-1-phosphate uridylyltransferase_ subgroup	Alpha/beta hydrolase
Vacuolar import and degradation_ Vid27-related	Basic helix-loop-helix dimerisation region bHLH
YCII-related	HEAT
Yippee-like protein	Ribosomal protein S14
YjgF-like protein
Zinc finger_ AN1-type	R. placenta|W.cocos|H.pinastri|F.radiculos
Zinc finger_ C2H2-like	Cyclin-like F-box
Zinc finger_ C2H2-type
Zinc finger_ RING-type	R. placenta|W.cocos|S.lacrymans|F.radiculos
	Basic-leucine zipper (bZIP) transcription factor
C.puteana	CDR ABC transporter
1-aminocyclopropane-1-carboxylate synthase	Taurine catabolism dioxygenase TauD/TfdA
2-oxoglutarate dehydrogenase_ E1 component	Ubiquitin
Adrenodoxin reductase
Aldose 1-epimerase	R. placenta|W.cocos|S.lacrymans|H.pinastri|F.radiculos
Allergen V5/Tpx-1 related	Ankyrin
Amine oxidase
Barwin	R. placenta|W.cocos|C.puteana|F.radiculos
B-cell receptor-associated 31-like	Flavodoxin/nitric oxide synthase
Beta-lactamase-type transpeptidase fold	Isopenicillin N synthase
Class II aldolase/adducin_ N-terminal	Metallophosphoesterase
Copper fist DNA-binding	Ras GTPase
Cyanase
Cyanate lyase_ C-terminal	R. placenta|W.cocos|C.puteana|H.pinastri|F.radiculos
Cytochrome b-245_ heavy chain	Amino acid permease-associated region
Divalent ion symporter	Amino acid/polyamine transporter I
Epoxide hydrolase	Haloacid dehalogenase-like hydrolase
Epoxide hydrolase_ N-terminal
Ferric reductase_ NAD binding	R. placenta|W.cocos|C.puteana|S.lacrymans|F.radiculos
Flavoprotein WrbA	Calcium-binding EF-hand
Glutamine synthetase_ beta-Grasp	Flavoprotein pyridine nucleotide cytochrome reductase
Glutamine synthetase_ catalytic region	Glucose-methanol-choline oxidoreductase
Glycoside hydrolase_ family 76	Oxidoreductase FAD/NAD(P)-binding
Glycosyltransferase sugar-binding region containing DXD motif
Glyoxalase/extradiol ring-cleavage dioxygenase	R. placenta|W.cocos|C.puteana|S.lacrymans|H.pinastri|F.radiculos
HAD-superfamily hydrolase_ subfamily IA_ variant 2	Aldehyde dehydrogenase
HAD-superfamily hydrolase_ subfamily IA_ variant 3	Aldo/keto reductase
Haloacid dehalogenase_ type II	AMP-dependent synthetase and ligase
Haloacid dehydrogenase/epoxide hydrolase	Aromatic-ring hydroxylase
Histidine acid phosphatase_ eukaryotic	Cytochrome b5
Hydantoinase/oxoprolinase	Cytochrome P450
Hydantoinaseoxoprolinase_ N-terminal	FAD-dependent pyridine nucleotide-disulphide oxidoreductase
Lysophospholipase_ catalytic region	Fungal specific transcription factor
O-methyltransferase_ family 3	General substrate transporter
Ornithine cyclodeaminase/mu-crystallin	Glucose/ribitol dehydrogenase
PAS fold-2	Histidine acid phosphatase
Peptidase C14_ caspase catalytic	Major facilitator superfamily
Peptidase C1B_ bleomycin hydrolase	Mitochondrial substrate carrier
Peptidase G1_ eqolisin	Oligopeptide transporter OPT superfamily
Peptidase M1_ membrane alanine aminopeptidase_ N-terminal	Phosphopantetheine attachment site
Peptidase M20_ carboxypeptidase S	Phosphopantetheine-binding
Phosphatidylethanolamine-binding_ conserved site	Serine/threonine protein kinase
Phospholipase A2_ active site	Short-chain dehydrogenase/reductase SDR
Phospholipase D/Transphosphatidylase	Sugar transporter
Phytochrome	Tyrosine protein kinase
Phytochrome chromophore attachment domain
Poly(ADP-ribose) polymerase_ regulatory region
Protein of unknown function DUF914_ eukaryotic
Protein of unknown function DUF917
Restriction endonuclease_ type II-like_ core
Ribosomal protein L31
Ricin B lectin
RNA-dependent RNA polymerase_ eukaryotic-type
SCP-like extracellular
Signal transduction histidine kinase_ core
Signal transduction histidine kinase_ homodimeric
Signal transduction histidine kinase_ subgroup 1_ dimerisation and phosphoacceptor region
Signal transduction histidine kinase-related protein_ C-terminal
SMP-30/Gluconolaconase/LRE-like region
SNO glutamine amidotransferase
Sphingomyelin phosphodiesterase
WGR
S.lacrymans
4'-phosphopantetheinyl transferase
Acetyl-CoA carboxylase_ central region
Acetyl-coenzyme A carboxyltransferase_ C-terminal
Acetyl-coenzyme A carboxyltransferase_ N-terminal
Acyl-CoA dehydrogenase/oxidase_ central region
Acyl-CoA dehydrogenase/oxidase_ middle and N-terminal
Aldehyde dehydrogenase NAD(P)-dependent
Alpha-1_2-mannosidase_ putative
Alpha-hydroxy acid dehydrogenase_ FMN-dependent
Alpha-N-acetylglucosaminidase
Amylo-alpha-1_6-glucosidase
Anion-transporting ATPase
Aromatic amino acid beta-eliminating lyase/threonine aldolase
ATPase_ F1 complex_ OSCP/delta subunit
BFD-like [2Fe-2S]-binding region
Biotin carboxylase_ C-terminal
Carbonic anhydrase
Carboxyl transferase
Catalase_ N-terminal
Catalase-related
Cdc37_ C-terminal
Cdc37_ Hsp90 binding
Cdc37_ N-terminal
Chondroitin AC/alginate lyase
Chorismate synthase
Concentrative nucleoside transporter
Crotonase_ core
Cryptochrome/DNA photolyase_ class 1
Cullin repeat-like
Cullin_ N-terminal region
DAHP synthetase I/KDSA
D-arabinono-1_4-lactone oxidase
DHAP synthase_ class 1
Dilute
DNA photolyase_ FAD-binding/Cryptochrome_ C-terminal
DNA photolyase_ N-terminal
DNA-directed DNA polymerase_ family B
Ent-kaurene synthase_ fungal
Fatty acid synthase
Fructose-bisphosphate aldolase_ class-I
Fumarylacetoacetase_ C-terminal-like
Fumarylacetoacetase_ C-terminal-related
Fungal fucose-specific lectin
Glycerophosphoryl diester phosphodiesterase
Glycoside hydrolase_ family 10
Glycoside hydrolase_ family 13_ N-terminal
Glycosyl hydrolase_ family 88
Glycosyl transferase_ group 1
HI0933-like protein
Hydroxymethylglutaryl-CoA reductase_ class I_ catalytic
Hydroxymethylglutaryl-CoA reductase_ class I/II_ catalytic
Hydroxymethylglutaryl-CoA reductase_ class I/II_ NAD/NADP-binding
Hydroxymethylglutaryl-CoA reductase_ class I/II_ substrate-binding
Metalloenzyme_ LuxS/M16 peptidase-like_ metal-binding
Mitochondrial glycoprotein
N2227-like
Na+ dependent nucleoside transporter
Na+ dependent nucleoside transporter_ C-terminal
Nitrate reductase NADH dependant
Nitrite and sulphite reductase 4Fe-4S region
Nitrite and sulphite reductase iron-sulphur/siroheme-binding site
Nitrite reductase [NAD(P)H] large subunit_ NirB
Nitrite reductase [NAD(P)H] large subunit_ NirD
Nitrite/sulphite reductase_ hemoprotein beta-component_ ferrodoxin-like
Nucleoside recognition
Nucleotide exchange factor Fes1
Oestrogen receptor_ AF1 modulatory
Ornithine carbamoyltransferase
Peptidase M16_ C-terminal
Peptidase M16_ N-terminal
Peptidase M16_ zinc-binding site
Peptidase S9_ serine active site
Peptidase S9A_ oligopeptidase_ N-terminal beta-propeller
Peptidase S9A_ prolyl oligopeptidase
Phenol hydroxylase_ C-terminal dimerisation
Phosphopantethiene-protein transferase
Polysaccharide lyase family 8_ central
Polysaccharide lyase family 8-like_ C-terminal
Protein of unknown function DUF221
Protein of unknown function DUF336
Protein of unknown function DUF775
Protein of unknown function DUF862_ eukaryotic
Protein of unknown function DUF967
Protein-tyrosine phosphatase_ active site
Protein-tyrosine phosphatase_ dual specificity
PUL
Pyruvate kinase_ alpha/beta
Pyruvate kinase_ barrel
Pyruvate kinase_ beta-barrel-like
Pyruvate kinase_ C-terminal-like
Region of unknown function DUF1729
Region of unknown function DUF1785
Rieske [2Fe-2S] region
RNA polymerase II-associated protein 1_ C-terminal
RNA polymerase II-associated protein 1_ N-terminal
S-adenosylmethionine decarboxylase
S-adenosylmethionine decarboxylase_ core
Signal recognition particle_ SRP54 subunit_ GTPase
Terpenoid cylases/protein prenyltransferase alpha-alpha toroid
ThiJ/PfpI
H.pinastri
1_ 4-beta cellobiohydrolase
3-hydroxyisobutyrate dehydrogenase-related_ conserved site
3-isopropylmalate dehydratase_ fused small/large subunits
3-isopropylmalate dehydrogenase
6-phosphogluconate dehydrogenase_ NAD-binding
Acetohydroxy acid isomeroreductase
Acetohydroxy acid isomeroreductase C-terminal
Acetohydroxy acid isomeroreductase_ catalytic
Aconitase_ mitochondrial-like
Alpha-isopropylmalate/homocitrate synthase_ conserved site
Aminoacyl-tRNA synthetase_ class Ia
Bicupin_ oxalate decarboxylase/oxidase
Carbohydrate-binding WSC_ subgroup
Catalytic domain of components of various dehydrogenase complexes
Cellulose-binding region_ fungal
Chaperonin GroEL
Citrate synthase_ eukaryotic
CsbD-like
Cupin 2_ conserved barrel
Cyclic nucleotide-binding
Cytochrome c oxidase_ subunit I
Cytochrome c_ monohaem
Cytochrome P450_ B-class
Drug resistance transporter EmrB/QacA subfamily
EGF-like region_ conserved site
Esterase_ PHB depolymerase
FAD-dependent glycerol-3-phosphate dehydrogenase
GH3 auxin-responsive promoter
Glycoside hydrolase_ family 17
Glycoside hydrolase_ family 25
Glycoside hydrolase_ family 25_ active site
Glycoside hydrolase_ family 6
Glycosyl transferase_ family 15
Guanine-specific ribonuclease N1 and T1
Histone H5
Homocitrate synthase_ fungi and archaea
Homoserine O-acetyltransferase
Indoleamine 2_3-dioxygenase
Inositol phosphatase/fructose-1_6-bisphosphatase
Invasin/intimin cell-adhesion
Isocitrate/isopropylmalate dehydrogenase
Ketol-acid reductoisomerase_ fungi
Leucyl-tRNA synthetase_ class Ia_ archaeal/eukaryotic cytosolic
Lipase_ GDXG_ active site
Methionine synthase_ vitamin-B12 independent
Methylated-DNA-[protein]-cysteine S-methyltransferase_ DNA binding
NADH dehydrogenase (ubiquinone)_ 20 kDa subunit
NADH ubiquinone oxidoreductase_ 20 kDa subunit
O-acetylhomoserine/O-acetylserine sulfhydrylase
Pentatricopeptide repeat
Phenazine biosynthesis PhzC/PhzF protein
Phenylalanine/histidine ammonia-lyase
Pheromone A receptor
Phosphatidic acid phosphatase type 2/haloperoxidase
Phosphoenolpyruvate carboxykinase (ATP)_ conserved site
Phosphoenolpyruvate carboxykinase_ ATP-utilising
Phosphoenolpyruvate carboxykinase_ N-terminal
Porin_ eukaryotic type
Protease-associated PA
Protein of unknown function DUF1766
Protein of unknown function UPF0132
Protein secE/sec61-gamma protein
Region of unknown function DUF1965
Ribonuclease U2
Ribonucleotide reductase
SAM-dependent methyltransferase_ EsaF-type_ putative
SGS
Signal peptidase 22 kDa subunit
Single-stranded nucleic acid binding R3H
Spermine synthase
Stomatin
Sucraseferredoxin-like
Sulphate transporter
Sulphate transporter/antisigma-factor antagonist STAS
Sulphate-modifying factor-like
Transferrin receptor-like_ dimerisation
tRNA-binding arm
Valyl/Leucyl/Isoleucyl-tRNA synthetase_ class I_ anticodon-binding
Valyl/Leucyl/Isoleucyl-tRNA synthetase_ class Ia_ editing
Zinc finger_ NF-X1-type
F.radiculos
20S proteasome_ A and B subunits
26S proteasome regulatory complex_ non-ATPase subcomplex_ Rpn2/Psmd1 subunit
26S proteasome subunit P45
3'5'-cyclic nucleotide phosphodiesterase
3-hydroxyacyl-CoA dehydrogenase_ C-terminal
3-hydroxyanthranilic acid dioxygenase
60 kDa inner membrane insertion protein
6-phosphogluconolactonase
7_8-Dihydro-6-hydroxymethylpterin-pyrophosphokinase_ HPPK
Acyl-CoA oxidase/dehydrogenase_ type 1
Acyltransferase ChoActase/COT/CPT
Adenylate cyclase-associated CAP_ N-terminal
Adenylate kinase
Adenylate kinase_ zinc-finger lid region
Adenylate/cytidine kinase_ N-terminal
Alkaline-phosphatase-like_ core domain
Alpha-D-phosphohexomutase_ alpha/beta/alpha domain I
Alpha-D-phosphohexomutase_ alpha/beta/alpha domain II
Alpha-D-phosphohexomutase_ alpha/beta/alpha I_ II and III
Alpha-D-phosphohexomutase_ conserved site
Alpha-D-phosphohexomutase_ C-terminal
Aminoacyl-tRNA synthetase_ class I_ anticodon-binding
Aminoacyl-tRNA synthetase_ class Ib
Aminoacyl-tRNA synthetase_ class II
Aminoacyl-tRNA synthetase_ class II (G_ H_ P and S)
Aminotransferase_ class IV
ANTH
Anthranilate synthase component II/delta crystallin
Anthranilate synthase_ component II_ fungi
Antibiotic biosynthesis monooxygenase
Anticodon-binding
Anti-silencing protein_ ASF1-like
APOBEC/CMP deaminase_ zinc-binding
Arf GTPase activating protein
Arginyl tRNA synthetase_ class Ic_ N-terminal
Arginyl-tRNA synthetase_ class Ic
Arginyl-tRNA synthetase_ class Ic_ core
Armadillo
Arsenical pump membrane protein
Asparaginase/glutaminase
Aspartate carbamoyltransferase_ eukaryotic
Aspartate/homoserine dehydrogenase_ NAD-binding
ATP dependent DNA ligase_ central
ATP dependent DNA ligase_ C-terminal
ATP10
ATPase associated with various cellular activities_ AAA-5
ATPase_ F0 complex_ subunit D_ mitochondrial
ATPase_ F1 complex_ beta subunit
ATPase_ F1 complex_ gamma subunit
ATPase_ F1/V1/A1 complex_ alpha/beta subunit_ C-terminal
ATPase_ F1/V1/A1 complex_ alpha/beta subunit_ N-terminal
ATPase_ F1/V1/A1 complex_ alpha/beta subunit_ nucleotide-binding
ATPase_ P type cation/copper-transporter
ATPase_ P-type copper-transporter
ATPase_ V1 complex_ subunit F_ eukaryotic
ATPase_ V1/A1 complex_ subunit F
ATP-dependent DNA ligase_ conserved site
ATP-NAD kinase_ PpnK-type
ATP-NAD/AcoX kinase
Autophagocytosis associated protein_ C-terminal
Auxin efflux carrier
BAR
Beta-lactamase_ class A
Bucentaur or craniofacial development
bZIP transcription factor_ bZIP-1
C-5 cytosine-specific DNA methylase
Calcium ATPase
Calcium-translocating P-type ATPase_ PMCA-type
Calcium-transporting P-type ATPase_ PMR1-type
Carbamoyl phosphate synthase_ GATase region
Carbamoyl phosphate synthase_ large subunit
Carbamoyl phosphate synthase_ large subunit_ glutamine-dependent
Carbamoyl phosphate synthetase_ large subunit_ oligomerisation
Carotenoid oxygenase
Cell surface receptor IPT/TIG
Cellular retinaldehyde-binding/triple function_ C-terminal
Cellular retinaldehyde-binding/triple function_ N-terminal
Chaperonin TCP-1_ conserved site
Chloride channel_ core
Chloride channel_ voltage gated
Clathrin adaptor_ mu subunit_ C-terminal
CMP/dCMP deaminase_ zinc-binding
Cof protein
Conserved hypothetical protein CHP00092
Cyclic-AMP phosphodiesterase_ class-II
Cyclic-AMP phosphodiesterase/lactamase
Cystathionine beta-synthase_ core
Cysteine synthase/cystathionine beta-synthase P-phosphate-binding site
Cytidine and deoxycytidylate deaminase_ zinc-binding region
Cytidine deaminase_ homotetrameric
Cytidine deaminase-like
Cytidyltransferase-related
Cytochrome bd ubiquinol oxidase_ 14 kDa subunit
Cytochrome c oxidase_ subunit VIa
Cytochrome c oxidase_ subunit VIb
Cytochrome cd1-nitrite reductase-like_ C-terminal haem d1
Cytoskeleton-associated protein_ CAP-Gly
D111/G-patch
DALR anticodon binding
Dbl homology (DH) domain
Delta crystallin
Diaphanous autoregulatory
Dihydroneopterin aldolase
Dihydroorotate dehydrogenase_ class 2
Dihydroorotate dehydrogenase_ core
Dihydropteroate synthase
Dihydropteroate synthase_ DHPS
Dihydropteroate synthase-like
Dihydrouridine synthase_ DuS
DNA helicase_ UvrD/REP type
DNA helicase_ UvrD-like_ C terminal
DNA ligase_ N-terminal
DNA mismatch repair protein MutS_ core
DNA mismatch repair protein MutS_ C-terminal
DNA repair and recombination_ RecA-like
DNA repair protein rad10
DNA repair protein RAD51
DNA repair Rad51/transcription factor NusA_ alpha-helical
DNA topoisomerase_ type IA_ central
DNA topoisomerase_ type IA_ core
DNA topoisomerase_ type IA_ DNA-binding
DNA topoisomerase_ type IA_ domain 2
DNA/RNA helicase_ ATP-dependent_ DEAH-box type_ conserved site
DNA-binding SAP
DNA-directed DNA polymerase_ family A
DNA-directed RNA polymerase_ 14 to 18 kDa subunit
DNA-directed RNA polymerase_ 30-40 kDa subunit_ conserved site
DNA-directed RNA polymerase_ dimerisation
DNA-directed RNA polymerase_ insert
DNA-directed RNA polymerase_ RBP11-like
DNA-directed RNA polymerase_ RpoA/D/Rpb3-type
DNA-directed RNA polymerase_ subunit 2_ domain 6
Elongation factor G_ III and V
ENTH/VHS
Epsin-like_ N-terminal
Erv1/Alr
Exocyst complex component Sec10
Exonuclease
Exonuclease_ RNase T and DNA polymerase III
Exoribonuclease_ phosphorolytic domain 1
Exoribonuclease_ phosphorolytic domain 2
F-actin capping protein_ beta subunit
FAD-binding_ type 1
FAD-linked oxidase_ C-terminal
FAD-linked oxidase-like_ C-terminal
Farnesyl-diphosphate farnesyltransferase
Ferroportin1
FKBP12-rapamycin-associated protein_ FKBP12-rapamycin-binding
FMN-binding split barrel_ related
Frataxin
Frataxin-like
Fumarate hydratase_ class II
Fumarate lyase
Fumarate reductase/succinate dehydrogenase flavoprotein_ C-terminal
Fumarate reductase/succinate dehydrogenase flavoprotein-like_ C-terminal
Fumarate reductase/succinate dehydrogenase_ FAD-binding site
Fungal chitin synthase
Fungal lignin peroxidase
Galactokinase
GC-rich sequence DNA-binding factor-like
GHMP kinase
GHMP kinase_ ATP-binding_ conserved site
GHMP kinase_ C-terminal
Glucosamine/galactosamine-6-phosphate isomerase
Glucose-6-phosphate dehydrogenase
Glutamine amidotransferase class-I_ C-terminal
Glutamine amidotransferase of anthranilate synthase
Glutamine amidotransferase superfamily
Glutamine amidotransferase_ class I_ active site
Glutamyl/glutaminyl-tRNA synthetase_ class Ic
Glutamyl-tRNA synthetase_ class Ic_ bacterial/mitochondrial
Glycine cleavage system T protein
Glycine cleavage T-protein_ C-terminal barrel
Glycine cleavage T-protein_ N-terminal
Glycolipid transfer protein_ GLTP
Glycoside hydrolase_ family 43
Glycoside hydrolase_ family 43_ endo-1_ 5-alpha-L-arabinosidase
Glycosyl transferase_ family 4
GPI ethanolamine phosphate transferase 1_ C-terminal
GTP1/OBG
GTP-binding
HAD superfamily hydrolase-like_ type 3
HAD-superfamily hydrolase_ subfamily IIID
Ham1-like protein
Heat shock chaperonin-binding
Heavy metal translocating P-type ATPase
Heavy metal transport/detoxification protein
Helicase-associated region
Helix-turn-helix_ AraC type
Hemopexin
Histidine biosynthesis
Histidine biosynthesis_ HisF
Hly-III related proteins
Homoserine dehydrogenase_ catalytic
HR1 rho-binding repeat
HRDC-like
I/LWEQ
Imidazole glycerol phosphate synthase HisHF
Imidazole glycerol phosphate synthase_ subunit H
Importin-beta_ N-terminal
Indole-3-glycerol phosphate synthase
Indole-3-glycerol phosphate synthase_ central region
Inositol polyphosphate related phosphatase
Iron hydrogenase
Iron hydrogenase_ large subunit_ C-terminal
Kelch repeat type 1
Kinase-associated KA1
Leucine-rich repeat
Leucine-rich repeat_ ribonuclease inhibitor subtype
Like-Sm ribonucleoprotein_ core
Like-Sm ribonucleoprotein_ eukaryotic and archaea-type_ core
Like-Sm ribonucleoprotein-related_ core
Lipopolysaccharide-modifying protein
Lipoprotein_ type 6
Longin-like
Maf-like protein
Major sperm protein
Mannose-6-phosphate isomerase
Mannose-6-phosphate isomerase_ type I
MAP kinase_ conserved site
Methylmalonate-semialdehyde dehydrogenase
Mevalonate and galactokinase
Mg2+ transporter protein_ CorA-like
MGS-like
Micro-fibrillar-associated 1_ C-terminal
Midasin
MIF4G-like_ type 3
Mitochondrial distribution and morphology protein family 31/32_ fungi
Mlu1-box-binding protein_ DNA-binding
Mob1/phocein
MoeZ/MoeB
Molybdenum cofactor biosynthesis
Molybdopterin synthase/thiamin biosynthesis sulphur carrier_ beta-grasp
Monooxygenase component MmoB/DmpM
MSF1
Multiprotein bridging factor 1_ N-terminal
N-(5'phosphoribosyl)anthranilate isomerase (PRAI)
N2_N2-dimethylguanosine tRNA methyltransferase
N-6 adenine-specific DNA methylase_ conserved site
NADH dehydrogenase [ubiquinone] (complex I)_ 21 kDa subunit_ fungi
NADH:ubiquinone oxidoreductase complex I intermediate-associated protein 30
Nicotinate-nucleotide pyrophosphorylase
Nonsense-mediated decay UPF3
Nrm1
NSF attachment protein
Nuclear transport factor 2
Nucleic acid-binding_ OB-fold-like
Nucleoside phosphatase GDA1/CD39
Nucleotide sugar epimerase
NUDIX hydrolase_ core
Oxidoreductase putative_ C-terminal
Oxysterol-binding protein
PAK-box/P21-Rho-binding
Pal1 cell morphology
Pantoate-beta-alanine ligase
PapD-like
Peptidase A22B_ signal peptide peptidase
Peptidase C19_ ubiquitin carboxyl-terminal hydrolase 2
Peptidase C78_ ubiquitin fold modifier-specific peptidase 1 and 2
Peptidase M14_ carboxypeptidase A
Peptidase M20D_ amidohydrolase
Peptidase M20D_ amidohydrolase_ predicted
Peptidase M24_ catalytic core
Peptidase M36_ fungalysin
Peptidase_ trypsin-like serine and cysteine
Peptidyl-prolyl cis-trans isomerase_ FKBP-type
Peptidyl-prolyl cis-trans isomerase_ PpiC-type
Peroxin-3
Peroxisomal biogenesis factor 11
Peroxisome membrane anchor protein Pex14p_ N-terminal
PHF5-like
Phosphatidylinositol 3- and 4-kinase_ catalytic
Phosphatidylinositol transfer protein-like_ N-terminal
Phosphoacetylglucosamine mutase
Phosphoadenosine phosphosulphate reductase
Phosphoadenosine phosphosulphate reductase CysH-type
Phosphoadenosine phosphosulphate reductase thioredoxin
Phospholipid/glycerol acyltransferase
Phospholipid-translocating P-type ATPase_ flippase
Phosphoserine aminotransferase
Phosphotransferase KptA/Tpt1
Phosphotransferase system_ HPr histidine phosphorylation site
Phosphotransferase system_ HPr serine phosphorylation site
Phox-like
PIK-related kinase
PIK-related kinase_ FAT
PIK-related kinase_ FATC
Prefoldin alpha subunit
Prefoldin alpha-like
Prohibitin
Proliferating cell nuclear antigen_ PCNA
Proliferation-associated protein 1
Proteasome/cyclosome_ regulatory subunit
Protein of unknown function DUF1212
Protein of unknown function DUF125_ transmembrane
Protein of unknown function DUF1295
Protein of unknown function DUF1325
Protein of unknown function DUF1365
Protein of unknown function DUF1546
Protein of unknown function DUF1762
Protein of unknown function DUF1769
Protein of unknown function DUF1977_ DnaJ-like
Protein of unknown function DUF500
Protein of unknown function DUF726
Protein of unknown function DUF803
Protein of unknown function DUF814
Protein of unknown function DUF829_ eukaryotic
Protein of unknown function DUF846_ eukaryotic
Protein of unknown function DUF907_ fungi
Protein of unknown function DUF933
Protein of unknown function NUC189_ C-terminal
Protein of unknown function UPF0171
Protein of unknown function UPF0261
Protein phosphatase 2A_ regulatory B subunit_ B56
Proteinase inhibitor I32_ inhibitor of apoptosis
P-type ATPase of unknown pump specificity (type V)
Pyridoxal phosphate-dependent enzyme_ beta subunit
Pyridoxamine 5'-phosphate oxidase-related_ FMN-binding core
Pyruvate dehydrogenase (acetyl-transferring) E1 component_ alpha subunit_ subgroup y
Quinolinate phosphoribosyl transferase
Rad51_ C-terminal
Rap1 Myb
RecA bacterial DNA recombination
Region of unknown function DUF1605
Rho GTPase activation protein
Rhodopsin_ bacterial
Ribonuclease HII
Ribonuclease HII/HIII
Ribosomal protein L21
Ribosomal protein L24e
Ribosomal protein L37_ mitochondrial
Ribosomal protein L40e
Ribosomal protein L47_ mitochondrial
Ribosomal protein S12_ bacterial-type
Ribosomal protein S13/S15_ N-terminal
Ribosomal protein S2_ bacterial-type
Ribosomal protein S5_ eukaryotic/archaeal
Ribosomal protein S5_ N-terminal
Ribosomal protein S6_ eukaryotic
Ribosomal protein S7_ eukaryotic/archaeal
Ribulose-phosphate binding barrel
RINT-1/TIP-1
RNA helicase_ DEAD-box type_ Q motif
RNA polymerase I associated factor_ A49-like
RNA polymerase II_ Rpb4
RNA polymerase II_ Rpb4_ core
RNA polymerase III Rpc4
RNA polymerase III Rpc82_ C -terminal
RNA polymerase III subunit RPC82-related_ helix-turn-helix
RNA polymerase Rpb2_ domain 2
RNA polymerase Rpb2_ domain 3
RNA polymerase Rpb2_ domain 4
RNA polymerase Rpb2_ domain 5
RNA polymerase Rpb2_ domain 7
RNA polymerase Rpb6
RNA polymerase Rpb7_ N-terminal
RNA polymerase_ beta subunit_ conserved site
RNA polymerase_ beta subunit_ protrusion
RNA-binding protein Lupus La
RNA-directed DNA polymerase (reverse transcriptase)
RuvA domain 2-like
S1_ RNA binding
S15/NS1_ RNA-binding
SAC3/GANP/Nin1/mts3/eIF-3 p25
Scramblase
SEC7-like
Serine/threonine-specific protein phosphatase and bis(5-nucleosyl)-tetraphosphatase
Shwachman-Bodian-Diamond syndrome proteins
Signal recognition particle_ SRP14 subunit
Signal recognition particle_ SRP9/SRP14 subunit
Small-subunit processome_ Utp11
Small-subunit processome_ Utp14
Somatotropin hormone
Squalene/phytoene synthase
Staphylococcal nuclease (SNase-like)
Staphylococcal nuclease (SNase-like)_ OB-fold
Sterol desaturase
Striatin_ N-terminal
Succinate dehydrogenase or fumarate reductase_ flavoprotein subunit
Succinate dehydrogenase_ flavoprotein subunit
SWAP/Surp
SWIB/MDM2
Syntaxin 6_ N-terminal
TATA box binding protein associated factor (TAF)
T-complex 11
T-complex protein 1_ delta subunit
TGS
TGS-like
Threonyl/alanyl tRNA synthetase_ SAD
Threonyl-tRNA synthetase_ class IIa
TOPRIM
Toprim subdomain
TRAF-like
Transcription factor jumonji
Transcription factor jumonji_ JmjN
Transcription factor jumonji/aspartyl beta-hydroxylase
Transketolase_ C-terminal
Transketolase_ C-terminal/Pyruvate-ferredoxin oxidoreductase_ domain II
TRASH
tRNA intron endonuclease_ catalytic domain-like
tRNA-binding region
Tryptophanyl-tRNA synthetase_ class Ib
Tubulin binding cofactor A
Type I phosphodiesterase/nucleotide pyrophosphatase/phosphate transferase
UBA/THIF-type NAD/FAD binding fold
Ubiquitin carboxyl-terminal hydrolase_ N-terminal region 1
Ubiquitin interacting motif
UDP-glucose 4-epimerase
UMUC-like DNA-repair protein
Uncharacterised conserved protein UCP033271
Unconventional myosin/plant kinesin-like protein/non-motor protein conserved region MyTH4
Up-frameshift suppressor 2
Vacuolar protein sorting-associated protein 35
Vesicle transport v-SNARE
Vesicle-associated membrane protein
von Willebrand factor_ type A
Yeast cell wall synthesis KRE9KNH1
Yos1-like
Zinc finger_ C2H2-type matrin
Zinc finger_ DHHC-type
Zinc finger_ FYVE-type
Zinc finger_ GATA-type
Zinc finger_ GRF-type
Zinc finger_ LIM-type
Zinc finger_ Tim10/DDP-type
Zinc finger_ U1-type
Zinc finger_ ZPR1-type
