# Supplementary material for: Systematic metadata analysis of brown rot fungi gene expression data reveals the genes involved in Fenton’s reaction and wood decay process
Source: Mycology. 2019 Dec 24;11(1):22–37. doi: 10.1080/21501203.2019.1703052 (PMC7033688; doi:10.1080/21501203.2019.1703052)
Supplement: Supplemental Material [file TMYC_A_1703052_SM9513.xlsx]

## Sheet: GSE12540
	The commonly observed significant gene lists among different growth substrates ball milled aspen, glucose and cellulose of GSE12540 dataset
	Differentially expressed genes between BMA vs Cellulose			Differentially expressed genes between BMA vs Glucose			Differentially expressed genes between Cellulose vs Glucose
	Protein-ID	Log FC	Description	Protein-ID	Log FC	Description	Protein-ID	Log FC	Description
	92777	1.11628	2Fe-2S ferredoxin, iron-sulfur binding site	90796	-1.49441	3-beta hydroxysteroid dehydrogenase/isomerase	24756	0.7262	2-nitropropane dioxygenase, NPD
	96901	0.561387	2OG-Fe(II) oxygenase superfamily	88045	0.564373	AAA ATPase	28683	1.42697	2-nitropropane dioxygenase, NPD
	102137	2.49626	2OG-Fe(II) oxygenase superfamily	94386	0.9449	AAA ATPase	102137	-2.96138	2OG-Fe(II) oxygenase superfamily
	103978	0.552987	2OG-Fe(II) oxygenase superfamily	97899	0.603267	AAA ATPase	90796	-1.11167	3-beta hydroxysteroid dehydrogenase/isomerase
	88045	0.722973	AAA ATPase	88045	0.564373	AAA ATPase, central region	87616	0.509763	AAA ATPase
	94386	1.36319	AAA ATPase	97899	0.603267	AAA ATPase, central region	93220	-0.661313	AAA ATPase
	88045	0.722973	AAA ATPase, central region	94386	0.9449	ABC transporter	97899	0.581543	AAA ATPase
	94386	1.36319	ABC transporter	89252	1.46627	Aldehyde dehydrogenase	97899	0.581543	AAA ATPase, central region
	96823	0.771587	ABC transporter	95200	0.739637	Aldehyde dehydrogenase	87616	0.509763	ABC transporter
	105646	0.521367	Aldehyde dehydrogenase	105646	0.88848	Aldehyde dehydrogenase	93220	-0.661313	ABC transporter
	87727	1.04636	Aldo/keto reductase	87727	2.59198	Aldo/keto reductase	103127	0.56947	Acyl-CoA dehydrogenase
	90082	0.706167	Aldo/keto reductase	89343	0.734907	Aldo/keto reductase	103127	0.56947	Acyl-CoA dehydrogenase, central region
	90503	-1.03218	Aldo/keto reductase	106373	-0.965243	Aldo/keto reductase	103127	0.56947	Acyl-CoA dehydrogenase, C-terminal
	96914	0.981027	Aldo/keto reductase	100251	2.01988	Alpha-L-arabinofuranosidase, C-terminal	103127	0.56947	Acyl-CoA dehydrogenase, N-terminal
	103995	-0.731327	Aldo/keto reductase	99906	0.843053	Amidase	90106	0.709243	AFG1-like ATPase
	100251	1.13535	Alpha-L-arabinofuranosidase, C-terminal	102604	1.39894	Amidohydrolase	89252	0.913567	Aldehyde dehydrogenase
	99906	0.7406	Amidase	102604	1.39894	Amidohydrolase-like	95200	0.524667	Aldehyde dehydrogenase
	38821	-0.867493	Amino acid permease-associated region	91803	1.11647	Argonaute and Dicer protein, PAZ	106354	0.951567	Aldehyde dehydrogenase
	38821	-0.867493	Amino acid/polyamine transporter I	88045	0.564373	ATP/GTP-binding site motif A (P-loop)	87727	1.54562	Aldo/keto reductase
	96823	0.771587	AMP-dependent synthetase and ligase	94386	0.9449	ATP/GTP-binding site motif A (P-loop)	103995	0.557207	Aldo/keto reductase
	36929	-1.03348	Anaphase-promoting complex subunit 10	128541	0.75488	ATP-binding region, ATPase-like	106373	-1.50981	Aldo/keto reductase
	22746	-0.901817	Ankyrin	128541	0.75488	Bacterial sensor protein, C-terminal	100251	0.88453	Alpha-L-arabinofuranosidase, C-terminal
	36929	-1.03348	Ankyrin	103917	1.4773	Basic helix-loop-helix dimerisation region bHLH	102604	0.979587	Amidohydrolase
	38770	-1.27836	Ankyrin	105294	0.62248	Beta-lactamase	102604	0.979587	Amidohydrolase-like
	91803	0.592367	Argonaute and Dicer protein, PAZ	38113	0.92148	BolA-like protein	38821	0.70046	Amino acid permease-associated region
	22746	-0.901817	Aromatic-ring hydroxylase	38576	0.90819	BolA-like protein	38821	0.70046	Amino acid/polyamine transporter I
	90902	0.665343	Aromatic-ring hydroxylase	106659	0.624073	Bromodomain	101845	0.692753	Amino acid/polyamine transporter I
	102162	0.582927	Aromatic-ring hydroxylase	109275	0.711657	Calcium-binding EF-hand	88321	-0.592683	Aminoacyl-transfer RNA synthetase, class II
	88045	0.722973	ATP/GTP-binding site motif A (P-loop)	109275	0.711657	Calcium-binding protein, S-100/ICaBP type	22746	0.935677	Ankyrin
	94386	1.36319	ATP/GTP-binding site motif A (P-loop)	95335	1.3214	Carbohydrate kinase, FGGY	36290	0.734537	Ankyrin
	96823	0.771587	ATP/GTP-binding site motif A (P-loop)	43588	2.53885	Carboxylesterase, type B	38770	1.29613	Ankyrin
	128541	0.60745	ATP-binding region, ATPase-like	50078	1.19842	Carboxylesterase, type B	92611	0.748873	Ankyrin
	101002	0.640527	Bacterial extracellular solute-binding protein, family	92024	1.43587	Carboxylesterase, type B	91803	0.524107	Argonaute and Dicer protein, PAZ
	128541	0.60745	Bacterial sensor protein, C-terminal	115141	-0.86801	Carboxylesterase, type B	22746	0.935677	Aromatic-ring hydroxylase
	103510	-1.20088	Basic helix-loop-helix dimerisation region bHLH	117372	1.94813	Carboxylesterase, type B	23052	1.09095	Aromatic-ring hydroxylase
	99159	-0.787613	Beta G-protein (transducin)	103520	0.745593	Caspase-1, p20	87616	0.509763	ATP/GTP-binding site motif A (P-loop)
	104560	1.09072	Beta tubulin	104834	1.36484	Caspase-1, p20	104696	0.988107	Auxin Efflux Carrier
	105294	1.00097	Beta-lactamase	34850	2.19902	Catechol dioxygenase, N-terminal	92951	0.501583	Basic helix-loop-helix dimerisation region bHLH
	89354	-0.651493	Beta-lactamase-like	93549	0.686963	Chloroperoxidase	103510	0.79028	Basic helix-loop-helix dimerisation region bHLH
	100833	-0.700847	BRCT	101749	1.13144	Cyanovirin-N	34169	0.76007	Basic-leucine zipper (bZIP) transcription factor
	106659	0.68251	Bromodomain	92811	0.713113	Cyclin-like F-box	96826	1.01056	BTB/POZ
	96826	-0.86127	BTB/POZ	97521	0.71061	Cyclin-like F-box	106648	0.53128	BTB/POZ
	105847	0.454273	BTB/POZ	100199	0.638593	Cyclin-like F-box	109275	0.615627	Calcium-binding EF-hand
	101577	0.651193	Calcium-binding EF-hand	104384	-0.630973	Cyclin-like F-box	109275	0.615627	Calcium-binding protein, S-100/ICaBP type
	102237	-1.14652	Carbohydrate kinase, PfkB	128099	1.66335	Cytochrome b/b6, N-terminal	127413	0.573893	CAP protein
	53332	-0.719907	Carbohydrate-binding domain, family V/XII	98329	0.725677	Cytochrome P450	95335	1.06176	Carbohydrate kinase, FGGY
	107968	-0.903043	Carbohydrate-binding domain, family V/XII	29102	0.797923	DEAD/DEAH box helicase	106160	0.498717	Carbohydrate kinase, FGGY
	50078	1.26335	Carboxylesterase, type B	29102	0.797923	DEAD/DEAH box helicase, N-terminal	102237	1.18669	Carbohydrate kinase, PfkB
	92024	1.24021	Carboxylesterase, type B	98518	1.5837	D-isomer specific 2-hydroxyacid dehydrogenase, catalytic region	107968	0.925373	Carbohydrate-binding domain, family V/XII
	115141	0.744743	Carboxylesterase, type B	98518	1.5837	D-isomer specific 2-hydroxyacid dehydrogenase, NAD-binding	43588	2.00707	Carboxylesterase, type B
	34850	0.847937	Catechol dioxygenase, N-terminal	98329	0.725677	E-class P450, group I	115141	-1.61275	Carboxylesterase, type B
	96685	-0.758447	CBF/Mak21	104834	1.36484	Endoplasmic reticulum targeting sequence	117372	1.57961	Carboxylesterase, type B
	105491	0.82126	CDR ABC transporter	43588	2.53885	Esterase/lipase/thioesterase	103732	0.940027	Caspase-1, p20
	95611	-0.680373	Cellular retinaldehyde-binding)/triple function, C-terminal	50078	1.19842	Esterase/lipase/thioesterase	104834	1.44579	Caspase-1, p20
	95611	-0.680373	Cellular retinaldehyde-binding/triple function, N-terminal	64334	1.068	Esterase/lipase/thioesterase	34850	1.35108	Catechol dioxygenase, N-terminal
	105942	0.548507	Checkpoint protein Rad24	94969	0.645993	Esterase/lipase/thioesterase	95611	0.641627	Cellular retinaldehyde-binding)/triple function, C-terminal
	107968	-0.903043	Chitinase II	95467	-0.67727	Esterase/lipase/thioesterase	95611	0.641627	Cellular retinaldehyde-binding/triple function, N-terminal
	98960	-0.670313	Citrate synthase	115141	-0.86801	Esterase/lipase/thioesterase	107968	0.925373	Chitinase II
	101749	0.965197	Cyanovirin-N	117372	1.94813	Esterase/lipase/thioesterase	126595	0.977743	Chitinase II
	92811	0.540217	Cyclin-like F-box	127291	1.16101	Esterase/lipase/thioesterase	93549	1.43784	Chloroperoxidase
	93794	0.53493	Cyclin-like F-box	122782	0.94867	Fungal G-protein, alpha subunit	98960	0.64981	Citrate synthase
	94682	1.01872	Cyclin-like F-box	96777	-0.86934	Fungal specific transcription factor	89573	0.756257	Ctr copper transporter
	95150	-0.811463	Cyclin-like F-box	86965	1.22734	Glucose/ribitol dehydrogenase	127413	0.573893	Cyclase-associated protein
	97521	0.77496	Cyclin-like F-box	99728	-0.785783	Glucose/ribitol dehydrogenase	90960	0.63382	Cyclin-like F-box
	98482	0.559903	Cyclin-like F-box	129218	1.17044	Glucose-methanol-choline oxidoreductase	93794	-0.732563	Cyclin-like F-box
	102104	-1.07433	Cyclin-like F-box	97355	1.67356	Glutathione S-transferase, C-terminal	94457	-0.71221	Cyclin-like F-box
	105275	0.69407	Cyclin-like F-box	97355	1.67356	Glutathione S-transferase, N-terminal	99150	-0.704737	Cyclin-like F-box
	101738	0.593783	Cytochrome b5	128099	1.66335	Glycoside hydrolase family 2, immunoglobulin-like beta-sandwich	102104	1.73127	Cyclin-like F-box
	91476	-0.915823	Cytochrome c heme-binding site	129476	2.48943	Glycoside hydrolase family 2, immunoglobulin-like beta-sandwich	104384	-0.713987	Cyclin-like F-box
	31744	0.59783	Cytochrome P450	120395	0.828387	Glycoside hydrolase, clan GH-D	35980	-0.9673	Cys/Met metabolism pyridoxal-phosphate-dependent enzymes
	36075	0.632667	Cytochrome P450	109743	2	Glycoside hydrolase, family 1	37279	0.8671	Cytidylyltransferase
	89741	1.07216	Cytochrome P450	105534	2.74174	Glycoside hydrolase, family 10	128099	1.22982	Cytochrome b/b6, N-terminal
	98329	0.648023	Cytochrome P450	113901	0.83718	Glycoside hydrolase, family 16	27005	1.09075	Cytochrome c heme-binding site
	100695	0.552483	Cytochrome P450	120395	0.828387	Glycoside hydrolase, family 27	90908	0.691597	Cytochrome c heme-binding site
	29102	0.89381	DEAD/DEAH box helicase	58192	1.01785	Glycoside hydrolase, family 28	97939	0.800717	Cytochrome P450
	29102	0.89381	DEAD/DEAH box helicase, N-terminal	104059	1.13729	Glycoside hydrolase, family 28	95603	0.790557	DH
	95603	-0.923617	DH	105711	0.63489	Glycoside hydrolase, family 28	98518	1.92354	D-isomer specific 2-hydroxyacid dehydrogenase, catalytic region
	90094	0.516483	DNA polymerase, beta-like region	46915	0.934103	Glycoside hydrolase, family 3, C-terminal	98518	1.92354	D-isomer specific 2-hydroxyacid dehydrogenase, NAD-binding
	105805	0.624427	Dual specificity protein phosphatase	110739	0.944397	Glycoside hydrolase, family 3, C-terminal	19691	0.475783	Dystroglycan-type cadherin-like
	19691	-0.650783	Dystroglycan-type cadherin-like	128500	1.17516	Glycoside hydrolase, family 3, C-terminal	97939	0.800717	E-class P450, group I
	31744	0.59783	E-class P450, group I	46915	0.934103	Glycoside hydrolase, family 3, N-terminal	104834	1.44579	Endoplasmic reticulum targeting sequence
	36075	0.632667	E-class P450, group I	110739	0.944397	Glycoside hydrolase, family 3, N-terminal	43588	2.00707	Esterase/lipase/thioesterase
	89741	1.07216	E-class P450, group I	128500	1.17516	Glycoside hydrolase, family 3, N-terminal	64334	0.959087	Esterase/lipase/thioesterase
	98329	0.648023	E-class P450, group I	55086	0.952757	Glycoside hydrolase, family 31	115141	-1.61275	Esterase/lipase/thioesterase
	100695	0.552483	E-class P450, group IV	117029	1.25034	Glycoside hydrolase, family 31	117372	1.57961	Esterase/lipase/thioesterase
	90019	0.734077	Elongation factor Tu, domain 2	127993	0.897417	Glycoside hydrolase, family 35	127291	1.00898	Esterase/lipase/thioesterase
	101577	0.651193	EPS15 homology (EH)	113221	0.57849	Glycoside hydrolase, family 47	22746	0.935677	Flavoprotein monooxygenase
	50078	1.26335	Esterase/lipase/thioesterase	121713	1.93775	Glycoside hydrolase, family 5	23052	1.09095	Flavoprotein monooxygenase
	98349	0.46771	Esterase/lipase/thioesterase	121831	1.47527	Glycoside hydrolase, family 5	24756	0.7262	FMN/related compound-binding core
	115141	0.744743	Esterase/lipase/thioesterase	129137	0.971203	Glycosyl hydrolase, family 88	122782	0.760367	Fungal G-protein, alpha subunit
	35476	-0.61336	Eukaryotic protein of unknown function	92024	1.43587	GMC oxidoreductase	96777	-0.92832	Fungal specific transcription factor
	105765	0.569483	FAD linked oxidase, N-terminal	129218	1.17044	GMC oxidoreductase	104047	0.91649	Fungal specific transcription factor
	102162	0.582927	FAD-dependent pyridine nucleotide-disulphide oxidoreductase	127993	0.897417	G-protein beta WD-40 repeat	92174	0.734927	Fungal transcriptional regulatory protein, N-terminal
	104195	-0.785943	FAD-dependent pyridine nucleotide-disulphide oxidoreductase	108707	0.734763	Guanine nucleotide binding protein (G-protein), alpha	97463	0.64547	Fungal transcriptional regulatory protein, N-terminal
	23306	0.870893	Flavin-containing monooxygenase FMO	113298	0.81795	Guanine nucleotide binding protein (G-protein), alpha	129974	0.657593	GAF
	22746	-0.901817	Flavoprotein monooxygenase	122782	0.94867	Guanine nucleotide binding protein (G-protein), alpha	88240	0.607333	GCN5-related N-acetyltransferase
	90902	0.665343	Flavoprotein monooxygenase	128945	0.689907	Guanine nucleotide binding protein (G-protein), alpha	92020	0.651663	GCN5-related N-acetyltransferase
	102162	0.582927	Flavoprotein monooxygenase	96257	0.69352	Haem peroxidase, plant/fungal/bacterial	98223	0.51679	General substrate transporter
	101738	0.593783	FMN/related compound-binding core	29102	0.797923	Helicase, C-terminal	89729	0.64941	Generic methyltransferase
	101738	0.593783	FMN-dependent alpha-hydroxy acid dehydrogenase	19821	0.986277	Heterokaryon incompatibility Het-C	103725	0.484367	GHMP kinase, ATP-binding region
	113593	0.607117	Fungal G-protein, alpha subunit	128541	0.75488	Histidine kinase	93076	0.454327	Glucose/ribitol dehydrogenase
	102374	0.541703	Fungal specific transcription factor	128541	0.75488	Histidine kinase A, N-terminal	99728	-0.740237	Glucose/ribitol dehydrogenase
	104047	-0.897677	Fungal specific transcription factor	128541	0.75488	Histidine kinase, HAMP region	106505	-0.56631	Glucose-methanol-choline oxidoreductase
	92174	-0.53293	Fungal transcriptional regulatory protein, N-terminal	102435	0.580513	Human Rev interacting-like protein (hRIP)	106782	0.899737	Glutathione S-transferase, N-terminal
	101577	0.651193	GAT	92677	0.623833	Inorganic pyrophosphatase	128099	1.22982	Glycoside hydrolase family 2, immunoglobulin-like beta-sandwich
	89729	-0.81379	Generic methyltransferase	101584	0.61836	Inositol monophosphatase	129476	1.41987	Glycoside hydrolase family 2, immunoglobulin-like beta-sandwich
	103725	-0.542853	GHMP kinase, ATP-binding region	34850	2.19902	Intradiol ring-cleavage dioxygenase	107968	0.925373	Glycoside hydrolase, chitinase active site
	90033	-0.70559	Glucose/ribitol dehydrogenase	118556	2.40722	Iron permease FTR1	126595	0.977743	Glycoside hydrolase, chitinase active site
	104981	-0.98477	Glucose/ribitol dehydrogenase	26886	1.54935	Isoprenylcysteine carboxyl methyltransferase	120395	0.702507	Glycoside hydrolase, clan GH-D
	104982	0.57118	Glucose/ribitol dehydrogenase	92811	0.713113	Isoprenylcysteine carboxyl methyltransferase	109743	1.50247	Glycoside hydrolase, family 1
	129218	0.865097	Glucose-methanol-choline oxidoreductase	87727	2.59198	KCNAB voltage-gated K+ channel, beta subunit	105534	1.88486	Glycoside hydrolase, family 10
	105119	0.541147	Glutamine amidotransferase, class-II	90029	-0.729657	Kinesin, motor region	113901	1.06915	Glycoside hydrolase, family 16
	28035	-0.609533	Glutamine synthetase, catalytic region	127291	1.16101	Lipase, class 3	107968	0.925373	Glycoside hydrolase, family 18
	97355	1.81414	Glutathione S-transferase, C-terminal	64334	1.068	Lipolytic enzyme	126595	0.977743	Glycoside hydrolase, family 18
	97355	1.81414	Glutathione S-transferase, N-terminal	95467	-0.67727	Lipolytic enzyme	120395	0.702507	Glycoside hydrolase, family 27
	129476	1.06956	Glycoside hydrolase family 2, immunoglobulin-like	32664	0.728897	Major facilitator superfamily	58192	0.489423	Glycoside hydrolase, family 28
	53332	-0.719907	Glycoside hydrolase, chitinase active site	43039	0.645647	Major facilitator superfamily	46915	0.688927	Glycoside hydrolase, family 3, C-terminal
	94833	-0.772037	Glycoside hydrolase, chitinase active site	102447	0.784157	Major facilitator superfamily	128500	1.206	Glycoside hydrolase, family 3, C-terminal
	107968	-0.903043	Glycoside hydrolase, chitinase active site	92024	1.43587	Mitochondrial substrate carrier	46915	0.688927	Glycoside hydrolase, family 3, N-terminal
	53332	-0.719907	Glycoside hydrolase, family 18	106456	0.733583	Monooxygenase, FAD-binding	128500	1.206	Glycoside hydrolase, family 3, N-terminal
	107968	-0.903043	Glycoside hydrolase, family 18	109824	2.73551	Multicopper oxidase, copper-binding site	55086	0.770067	Glycoside hydrolase, family 31
	43190	0.482823	Glycoside hydrolase, family 28	109824	2.73551	Multicopper oxidase, type 1	117029	0.799343	Glycoside hydrolase, family 31
	104059	0.670167	Glycoside hydrolase, family 28	91346	0.590503	NULL	20184	0.86053	Glycoside hydrolase, family 37
	105711	0.533223	Glycoside hydrolase, family 28	92024	1.43587	NULL	121713	1.23954	Glycoside hydrolase, family 5
	127993	0.594387	Glycoside hydrolase, family 35	94507	0.84173	NULL	121831	0.94571	Glycoside hydrolase, family 5
	20184	-0.782513	Glycoside hydrolase, family 37	103917	1.4773	NULL	111437	0.794553	Glycoside hydrolase, family 71
	121713	0.698217	Glycoside hydrolase, family 5	121713	1.93775	NULL	112574	0.821603	Glycosyl hydrolase, family 88
	98866	0.720723	Glycoside hydrolase, family 71	102711	0.685593	Oligopeptide transporter OPT superfamily	129137	0.795463	Glycosyl hydrolase, family 88
	111437	-0.7393	Glycoside hydrolase, family 71	109275	0.711657	Parvalbumin	87622	0.75739	Glycosyl transferase, family 8
	112574	-0.625973	Glycosyl hydrolase, family 88	54928	0.884207	Pectinesterase	106505	-0.56631	GMC oxidoreductase
	92024	1.24021	GMC oxidoreductase	95734	0.671177	Peptidase A1, pepsin	87967	0.81077	GroES-related
	129218	0.865097	GMC oxidoreductase	95735	0.64817	Peptidase A1, pepsin	103443	0.548983	GTP cyclohydrolase I
	34636	-0.845227	G-protein beta WD-40 repeat	96655	1.06144	Peptidase A1, pepsin	122782	0.760367	Guanine nucleotide binding protein (G-protein), alpha
	99159	-0.787613	G-protein beta WD-40 repeat	106791	0.67676	Peptidase A1, pepsin	99841	0.589487	H+-transporting two-sector ATPase, alpha/beta subunit, central
	106514	-0.743513	G-protein beta WD-40 repeat	95734	0.671177	Peptidase aspartic, active site	93794	-0.732563	HEAT
	127993	0.594387	G-protein beta WD-40 repeat	95735	0.64817	Peptidase aspartic, active site	100286	0.699157	Helix-turn-helix, Fis-type
	113593	0.607117	Guanine nucleotide binding protein (G-protein),	96655	1.06144	Peptidase aspartic, active site	103522	0.627247	Helix-turn-helix, Fis-type
	31744	0.59783	H+-transporting two-sector ATPase, alpha/beta subunit,	98186	-0.837413	Peptidase C2, calpain	129974	0.657593	Histidine kinase A, N-terminal
	93794	0.53493	HEAT	19052	0.997653	Peptidase C48, SUMO/Sentrin/Ubl1	33879	1.07403	HMG-CoA lyase-like
	94890	0.625843	Heat shock protein DnaJ	88045	0.564373	Peptidase S16, active site	35003	0.712967	HypB/UreG, nucleotide-binding
	103764	0.545917	Heat shock protein DnaJ	88045	0.564373	Peptidase S16, ATP-dependent protease La	92677	1.16027	Inorganic pyrophosphatase
	94890	0.625843	Heat shock protein DnaJ, N-terminal	88045	0.564373	Peptidase S16, lon C-terminal	94457	-0.71221	Inorganic pyrophosphatase
	103764	0.545917	Heat shock protein DnaJ, N-terminal	88045	0.564373	Peptidase S16, lon protease	95180	0.85702	Inorganic pyrophosphatase
	29102	0.89381	Helicase, C-terminal	97064	0.740543	Peptidylprolyl isomerase, FKBP-type	34850	1.35108	Intradiol ring-cleavage dioxygenase
	101708	-0.672303	Helix-turn-helix, AraC type	99692	1.7403	Permease for cytosine/purines, uracil, thiamine, allantoin	105259	0.476683	IQ calmodulin-binding region
	128541	0.60745	Histidine kinase	94244	-0.561217	Phosphatidylserine decarboxylase-related	118556	1.80633	Iron permease FTR1
	128541	0.60745	Histidine kinase A, N-terminal	89343	0.734907	Phosphopantetheine attachment site	102137	-2.96138	Isopenicillin N synthase
	128541	0.60745	Histidine kinase, HAMP region	116123	1.20635	Polysaccharide deacetylase	26886	0.902923	Isoprenylcysteine carboxyl methyltransferase
	104707	0.90267	HMG1/2 (high mobility group) box	41450	0.60416	Possible metal-binding region in RNase L	95283	0.575363	Isoprenylcysteine carboxyl methyltransferase
	105757	0.600343	HPr serine phosphorylation site	103650	0.528917	Protein kinase	106690	0.778257	Isoprenylcysteine carboxyl methyltransferase
	102435	0.614177	Human Rev interacting-like protein (hRIP)	105294	0.62248	Protein kinase	87727	1.54562	KCNAB voltage-gated K+ channel, beta subunit
	90687	-1.13421	Immunoglobulin/major histocompatibility complex	115338	0.820847	Protein kinase	94267	0.541193	Late embryogenesis abundant protein
	96957	-0.59084	Immunoglobulin/major histocompatibility complex	41450	0.60416	Protein of unknown function DUF367	33906	1.25611	Lipase, active site
	34850	0.847937	Intradiol ring-cleavage dioxygenase	38177	0.607277	Protein of unknown function DUF572	127291	1.00898	Lipase, class 3
	96901	0.561387	Isopenicillin N synthase	35694	1.14304	Pyridoxamine 5'-phosphate oxidase	64334	0.959087	Lipolytic enzyme
	102137	2.49626	Isopenicillin N synthase	35694	1.14304	Pyridoxamine 5'-phosphate oxidase-related	100517	0.537257	Lysophospholipase, catalytic region
	26886	0.646427	Isoprenylcysteine carboxyl methyltransferase	97277	0.607797	Rare lipoprotein A	41239	-0.477507	Major facilitator superfamily
	92811	0.540217	Isoprenylcysteine carboxyl methyltransferase	97634	0.754313	RecA bacterial DNA recombination protein	98223	0.51679	Major facilitator superfamily
	87727	1.04636	KCNAB voltage-gated K+ channel, beta	109275	0.711657	Recoverin	100242	0.986643	Major facilitator superfamily
	101738	0.593783	L-lactate dehydrogenase, cytochrome	91190	0.522423	Regulator of chromosome condensation, RCC1	106546	-0.644277	Major facilitator superfamily
	22289	0.670383	Major facilitator superfamily	20877	1.00995	Ribosomal protein S2	109824	2.44071	Multicopper oxidase, copper-binding site
	36700	-0.692633	Metallophosphoesterase	28140	0.99535	RPEL repeat	109824	2.44071	Multicopper oxidase, type 1
	92024	1.24021	Mitochondrial substrate carrier	97020	0.82592	RTA1 like protein	111314	1.19529	Multicopper oxidase, type 1
	90902	0.665343	Monooxygenase, FAD-binding	103650	0.528917	Serine/threonine protein kinase	93472	1.60451	N-6 Adenine-specific DNA methylase
	102162	0.582927	Monooxygenase, FAD-binding	105294	0.62248	Serine/threonine protein kinase	103476	-0.724333	NADH:flavin oxidoreductase/NADH oxidase
	106456	0.69395	Monooxygenase, FAD-binding	115338	0.820847	Serine/threonine protein kinase	20184	0.86053	Neutral trehalase Ca2+ binding
	105389	0.530197	N-6 Adenine-specific DNA methylase	105294	0.62248	Serine/threonine protein kinase, active site	41978	0.98875	Neutral trehalase Ca2+ binding
	90902	0.665343	NAD-binding site	86965	1.22734	Short-chain dehydrogenase/reductase SDR	41983	0.8917	Neutral trehalase Ca2+ binding
	102162	0.582927	NAD-binding site	99728	-0.785783	Short-chain dehydrogenase/reductase SDR	91577	0.732913	Neutral trehalase Ca2+ binding
	20184	-0.782513	Neutral trehalase Ca2+ binding	30294	0.617493	Sodium/hydrogen exchanger	91441	0.7247	NULL
	41978	-0.744597	Neutral trehalase Ca2+ binding	91803	1.11647	Stem cell self-renewal protein Piwi	92951	0.501583	NULL
	41983	-0.705187	Neutral trehalase Ca2+ binding	43039	0.645647	Sugar transporter superfamily	94362	1.04025	NULL
	91577	-0.651247	Neutral trehalase Ca2+ binding	55267	2.08014	Tannase and feruloyl esterase	95156	0.634643	NULL
	27897	-0.527257	NUDIX hydrolase	55907	0.972453	Tannase and feruloyl esterase	96787	-0.707127	NULL
	90945	1.0598	NULL	102711	0.685593	Tetrapeptide transporter, OPT1/isp4	98940	0.92651	NULL
	91441	-0.755217	NULL	87630	1.0327	Thiolase	103510	0.79028	NULL
	92024	1.24021	NULL	109824	2.73551	TonB box, N-terminal	121713	1.23954	NULL
	92369	0.706967	NULL	103650	0.528917	Tyrosine protein kinase	109275	0.615627	Parvalbumin
	92630	1.15499	NULL	115338	0.820847	Tyrosine protein kinase	54928	0.537287	Pectinesterase
	95156	-0.71889	NULL	91960	0.769113	Tyrosine protein kinase, active site	92240	0.929613	Peptidase A1, pepsin
	100123	1.92653	NULL	91343	0.905417	Ubiquitin	95757	1.32032	Peptidase A1, pepsin
	103510	-1.20088	NULL	101173	0.540373	Ubiquitin system component Cue	106791	0.92244	Peptidase A1, pepsin
	121713	0.698217	NULL	91453	0.855533	Universal stress protein (Usp)	92240	0.929613	Peptidase aspartic, active site
	102711	0.5816	Oligopeptide transporter OPT superfamily	91453	0.855533	UspA	95757	1.32032	Peptidase aspartic, active site
	105020	-0.6393	OsmC-like protein	88101	0.941413	Zinc-containing alcohol dehydrogenase superfamily	91248	0.541217	Peptidase C15, pyroglutamyl peptidase I
	99730	-0.62995	Oxidoreductase, C-terminal	43009	0.899153	Zn-finger, C2H2 type	100834	1.03254	Peptidase M, neutral zinc metallopeptidases, zinc-binding
	99730	-0.62995	Oxidoreductase, N-terminal	93084	0.578113	Zn-finger, C2H2 type	98351	0.83845	Peptidase, eukaryotic cysteine peptidase active site
	90094	0.516483	PAP/25A core	102288	-0.628603	Zn-finger, C2H2 type	88253	0.65319	Peptidyl-prolyl cis-trans isomerase, cyclophilin type
	43190	0.482823	Parallel beta-helix repeat	103805	1.005	Zn-finger, C2H2 type	88321	-0.592683	Phenylalanyl-tRNA synthetase, class IIc
	33531	-0.642413	Peptidase A1, pepsin	91165	0.825403	Zn-finger, CCHC type	94402	0.58741	Phosphopantetheine attachment site
	92240	-0.651143	Peptidase A1, pepsin	92007	0.61593	Zn-finger, CCHC type	95421	0.591407	Pleckstrin-like
	95734	0.622563	Peptidase A1, pepsin	92122	0.730977	Zn-finger, CCHC type	95603	0.790557	Pleckstrin-like
	95757	-0.885513	Peptidase A1, pepsin	92483	0.873647	Zn-finger, CCHC type	47053	0.64374	Polysaccharide deacetylase
	96655	0.885423	Peptidase A1, pepsin	93630	0.699083	Zn-finger, CCHC type	116123	1.26847	Polysaccharide deacetylase
	33531	-0.642413	Peptidase aspartic, active site	95432	0.745053	Zn-finger, CCHC type	22049	0.74703	Protein kinase
	92240	-0.651143	Peptidase aspartic, active site	95965	1.77747	Zn-finger, CCHC type	24514	-0.873633	Protein kinase
	95734	0.622563	Peptidase aspartic, active site	97819	0.770837	Zn-finger, CCHC type	27981	0.800657	Protein kinase
	95757	-0.885513	Peptidase aspartic, active site	98310	0.79955	Zn-finger, CCHC type	92391	0.518223	Protein kinase
	96655	0.885423	Peptidase aspartic, active site	98935	1.08345	Zn-finger, CCHC type	100242	0.986643	Protein kinase
	92369	0.706967	Peptidase C19, ubiquitin carboxyl-terminal hydrolase	99404	1.23465	Zn-finger, CCHC type	102356	0.83524	Protein kinase
	96518	0.8312	Peptidase C48, SUMO/Sentrin/Ubl1	99591	0.725733	Zn-finger, CCHC type	106335	-0.561023	Protein kinase
	95537	-0.97787	Peptidase M, neutral zinc metallopeptidases,	100338	0.66957	Zn-finger, CCHC type	112228	0.640817	Protein kinase
	100834	-0.928007	Peptidase M, neutral zinc metallopeptidases,	100754	0.605313	Zn-finger, CCHC type	42998	0.577953	Protein of unknown function DUF1242
	106332	0.62332	Peptidase M, neutral zinc metallopeptidases,	100955	0.658383	Zn-finger, CCHC type	42892	0.677427	Protein of unknown function DUF543
	88045	0.722973	Peptidase S16, active site	101206	0.646673	Zn-finger, CCHC type	96618	0.54352	Protein of unknown function DUF544
	88045	0.722973	Peptidase S16, ATP-dependent protease La	101974	0.565313	Zn-finger, CCHC type	41078	1.77391	Protein of unknown function DUF92
	88045	0.722973	Peptidase S16, lon C-terminal	102522	0.823967	Zn-finger, CCHC type	104986	0.69989	Protein tyrosine phosphatase-like protein, PTPLA
	88045	0.722973	Peptidase S16, lon protease	103235	0.744343	Zn-finger, CCHC type	100592	0.588797	PRP1 splicing factor, N-terminal
	91802	-0.935133	Peptidase, eukaryotic cysteine peptidase active	103262	0.99869	Zn-finger, CCHC type	93552	0.776987	Purine phosphorylase, family 2
	98351	-0.904103	Peptidase, eukaryotic cysteine peptidase active	104890	0.665953	Zn-finger, CCHC type	19691	0.475783	Putative Ig
	101910	0.710263	Peptidase, eukaryotic cysteine peptidase active	99485	0.73895	Zn-finger, GATA type	35692	0.867247	Pyridoxamine 5'-phosphate oxidase
	88253	-0.63384	Peptidyl-prolyl cis-trans isomerase, cyclophilin type				35692	0.867247	Pyridoxamine 5'-phosphate oxidase-related
	97064	0.717637	Peptidylprolyl isomerase, FKBP-type				93559	2.2778	Pyrokinin
	87648	0.704197	Permease for cytosine/purines, uracil, thiamine,				20333	-0.89627	Pyruvate decarboxylase
	99692	1.49621	Permease for cytosine/purines, uracil, thiamine,				109275	0.615627	Recoverin
	100862	0.539523	Permease for cytosine/purines, uracil, thiamine,				129974	0.657593	Response regulator receiver
	94402	-0.64499	Phosphopantetheine attachment site				90611	0.632213	Rhomboid-like protein
	95421	-0.81982	Pleckstrin-like				113622	0.52453	Ribosomal protein L16
	95603	-0.923617	Pleckstrin-like				20877	0.64641	Ribosomal protein S2
	90094	0.516483	Poly(A) polymerase, central region				34169	0.76007	Ribosomal protein S5
	90094	0.516483	Poly(A) polymerase, RNA-binding region				34169	0.76007	Ribosomal protein S5, C-terminal
	22788	-0.900823	Protein kinase				106002	0.669073	Ribosomal RNA methyltransferase RrmJ/FtsJ
	27981	-0.993393	Protein kinase				106004	0.570947	Ribosomal RNA methyltransferase RrmJ/FtsJ
	92153	0.601037	Protein kinase				106616	0.782877	RNA-binding region RNP-1 (RNA recognition motif)
	100013	-0.553163	Protein kinase				28140	1.52927	RPEL repeat
	105294	1.00097	Protein kinase				93128	1.2032	S1/P1 nuclease
	112798	-0.5306	Protein kinase				89729	0.64941	SAM (and some other nucleotide) binding
	112798	-0.5306	Protein kinase, C-terminal				93518	0.79937	Scavenger mRNA decapping enzyme
	96618	-0.562253	Protein of unknown function DUF544				22049	0.74703	Serine/threonine protein kinase
	36700	-0.692633	Protein of unknown function UPF0025				24514	-0.873633	Serine/threonine protein kinase
	105275	0.69407	Protein prenyltransferase, alpha subunit				100242	0.986643	Serine/threonine protein kinase
	90019	0.734077	Protein synthesis factor, GTP-binding				102356	0.83524	Serine/threonine protein kinase
	104986	-0.650213	Protein tyrosine phosphatase-like protein, PTPLA				112228	0.640817	Serine/threonine protein kinase
	19691	-0.650783	Putative Ig				22049	0.74703	Serine/threonine protein kinase, active site
	102162	0.582927	Pyridine nucleotide-disulphide oxidoreductase, class I				24514	-0.873633	Serine/threonine protein kinase, active site
	93559	-1.81956	Pyrokinin				100242	0.986643	Serine/threonine protein kinase, active site
	20333	0.996363	Pyruvate decarboxylase				102356	0.83524	Serine/threonine protein kinase, active site
	92371	0.93526	Regulator of chromosome condensation, RCC1				112228	0.640817	Serine/threonine protein kinase, active site
	105942	0.548507	Replication factor C conserved region				99728	-0.740237	Short-chain dehydrogenase/reductase SDR
	22910	0.736367	RhoGAP				95211	1.19507	Smr protein/MutS2 C-terminal
	103948	-1.11412	Ribosome recycling factor				91803	0.524107	Stem cell self-renewal protein Piwi
	105236	0.592107	RNA-binding region RNP-1 (RNA recognition				98223	0.51679	Sugar transporter
	106616	-0.861753	RNA-binding region RNP-1 (RNA recognition				41239	-0.477507	Sugar transporter superfamily
	93358	-0.584263	Rubredoxin				100679	0.62019	TAFII28-like protein
	89729	-0.81379	SAM (and some other nucleotide)				55267	1.30636	Tannase and feruloyl esterase
	93518	-1.00464	Scavenger mRNA decapping enzyme				89958	-2.45875	Taurine catabolism dioxygenase TauD/TfdA
	22788	-0.900823	Serine/threonine protein kinase				102287	-1.53126	Taurine catabolism dioxygenase TauD/TfdA
	105294	1.00097	Serine/threonine protein kinase				93794	-0.732563	TBP-interacting 120
	112798	-0.5306	Serine/threonine protein kinase				99246	0.920387	TEA/ATTS
	22788	-0.900823	Serine/threonine protein kinase, active site				109824	2.44071	TonB box, N-terminal
	105294	1.00097	Serine/threonine protein kinase, active site				92321	0.567557	TPR repeat
	112798	-0.5306	Serine/threonine protein kinase, active site				106616	0.782877	TPR repeat
	90033	-0.70559	Short-chain dehydrogenase/reductase SDR				89994	0.922897	Transport protein particle (TRAPP) component, Bet3
	94943	-0.61586	Short-chain dehydrogenase/reductase SDR				22049	0.74703	Tyrosine protein kinase
	104981	-0.98477	Short-chain dehydrogenase/reductase SDR				24514	-0.873633	Tyrosine protein kinase
	104982	0.57118	Short-chain dehydrogenase/reductase SDR				100242	0.986643	Tyrosine protein kinase
	95211	-0.806643	Smr protein/MutS2 C-terminal				102356	0.83524	Tyrosine protein kinase
	22876	-0.618503	SNF5/SMARCB1/INI1				112228	0.640817	Tyrosine protein kinase
	30294	0.543297	Sodium/hydrogen exchanger				90970	-0.958193	Tyrosine protein kinase, active site
	91803	0.592367	Stem cell self-renewal protein Piwi				91969	-0.715253	Tyrosine protein kinase, active site
	22289	0.670383	Sugar transporter superfamily				98932	-0.579843	Tyrosine protein kinase, active site
	91169	0.556637	Synaptojanin, N-terminal				100575	-0.68499	Tyrosine protein kinase, active site
	55907	0.908547	Tannase and feruloyl esterase				35007	0.876287	UbiA prenyltransferase
	89958	1.29526	Taurine catabolism dioxygenase TauD/TfdA				89729	0.64941	UbiE/COQ5 methyltransferase
	102287	0.999787	Taurine catabolism dioxygenase TauD/TfdA				35003	0.712967	Urease accessory protein UreG
	93794	0.53493	TBP-interacting 120				25459	0.614267	UV-endonuclease UvdE
	99246	-0.829597	TEA/ATTS				105932	0.494803	YjgF-like protein
	102711	0.5816	Tetrapeptide transporter, OPT1/isp4				87967	0.81077	Zinc-containing alcohol dehydrogenase
	35015	-0.979283	Thioesterase superfamily				87967	0.81077	Zinc-containing alcohol dehydrogenase superfamily
	87630	0.671607	Thiolase				101390	1.24868	Zn-finger, C2H2 type
	95148	0.637397	TPR repeat				104682	0.608103	Zn-finger, CCHC type
	102729	1.69888	TPR repeat				104870	0.61153	Zn-finger, CCHC type
	106616	-0.861753	TPR repeat
	22788	-0.900823	Tyrosine protein kinase
	112798	-0.5306	Tyrosine protein kinase
	91960	0.804607	Tyrosine protein kinase, active site
	98932	0.539367	Tyrosine protein kinase, active site
	105805	0.624427	Tyrosine specific protein phosphatase
	105805	0.624427	Tyrosine specific protein phosphatase and
	102162	0.582927	UBA/THIF-type NAD/FAD binding fold
	89729	-0.81379	UbiE/COQ5 methyltransferase
	91343	1.01608	Ubiquitin
	30640	0.49501	UMUC-like DNA-repair protein
	25459	-0.530023	UV-endonuclease UvdE
	103053	0.791467	Zinc transporter ZIP
	88101	0.885093	Zinc-containing alcohol dehydrogenase superfamily
	101910	0.710263	Zinc-containing alcohol dehydrogenase superfamily
	30640	0.49501	Zn-finger Rad18
	93083	0.809943	Zn-finger, C2H2 type
	93084	0.64404	Zn-finger, C2H2 type
	93358	-0.584263	Zn-finger, C2H2 type
	99056	-0.66163	Zn-finger, C2H2 type
	101390	-1.29216	Zn-finger, C2H2 type
	103233	-0.66934	Zn-finger, C2H2 type
	103805	0.669747	Zn-finger, C2H2 type
	105148	0.6476	Zn-finger, C2H2 type
	105961	0.676847	Zn-finger, C2H2 type
	91165	0.534887	Zn-finger, CCHC type
	91756	0.603753	Zn-finger, CCHC type
	92128	0.794923	Zn-finger, CCHC type
	92183	0.523293	Zn-finger, CCHC type
	92476	0.80795	Zn-finger, CCHC type
	92478	0.553953	Zn-finger, CCHC type
	92483	0.601597	Zn-finger, CCHC type
	92752	1.18547	Zn-finger, CCHC type
	94597	1.14846	Zn-finger, CCHC type
	95660	0.629123	Zn-finger, CCHC type
	95964	0.586673	Zn-finger, CCHC type
	95965	1.19397	Zn-finger, CCHC type
	95988	0.74961	Zn-finger, CCHC type
	96417	0.813517	Zn-finger, CCHC type
	96591	0.85915	Zn-finger, CCHC type
	96674	0.650003	Zn-finger, CCHC type
	96820	0.934857	Zn-finger, CCHC type
	97818	0.773473	Zn-finger, CCHC type
	97819	0.515993	Zn-finger, CCHC type
	98192	0.798633	Zn-finger, CCHC type
	98199	0.686247	Zn-finger, CCHC type
	98935	0.94146	Zn-finger, CCHC type
	99404	1.64373	Zn-finger, CCHC type
	100090	0.56366	Zn-finger, CCHC type
	100363	1.25236	Zn-finger, CCHC type
	100754	0.513937	Zn-finger, CCHC type
	100817	0.7651	Zn-finger, CCHC type
	101206	0.50041	Zn-finger, CCHC type
	102504	1.27618	Zn-finger, CCHC type
	102522	0.710927	Zn-finger, CCHC type
	103218	0.99865	Zn-finger, CCHC type
	103235	0.600483	Zn-finger, CCHC type
	103262	0.72487	Zn-finger, CCHC type
	104482	0.89033	Zn-finger, CCHC type
	105421	1.00661	Zn-finger, CCHC type
	105502	0.84836	Zn-finger, CCHC type
	105700	0.671523	Zn-finger, CCHC type
	99485	0.6935	Zn-finger, GATA type
	96957	-0.59084	Zn-finger-like, PHD finger
	105061	0.5063	Zn-finger-like, PHD finger

## Sheet: GSE29656
Differentially expressed genes between Ball milled pine vs Ball milled aspen
Protein-ID	Log FC	Description
90700	0.55512	1-(5-Phosphoribosyl)-5-amino-4-imidazole-carboxylate (AIR) carboxylase
97899	-0.609074	AAA ATPase
106600	1.13796	AAA ATPase
97899	-0.609074	AAA ATPase, central region
106600	1.13796	ABC transporter
96228	0.487638	Acyl-CoA thioesterase
88965	0.700463	Adenine nucleotide translocator 1
101141	0.670694	AIR synthase related protein
101141	0.670694	AIR synthase related protein, C-terminal
102347	0.761043	Aldehyde dehydrogenase
89192	0.736138	Alpha-isopropylmalate/homocitrate synthase
91788	0.617452	Amino acid permease
91788	0.617452	Amino acid permease-associated region
91788	0.617452	Amino acid/polyamine transporter I
93147	0.777256	Amino acid-binding ACT
91803	-0.622861	Argonaute and Dicer protein, PAZ
93147	0.777256	Aspartate kinase
93147	0.777256	Aspartate/glutamate/uridylate kinase
90700	0.55512	ATP-dependent carboxylate-amine ligase-like, ATP-grasp
104222	-0.640978	ATP-dependent DNA ligase
36161	-0.885718	BTB/POZ
90917	-0.761316	BTB/POZ
106648	-0.622617	BTB/POZ
95335	0.68528	Carbohydrate kinase, FGGY
107968	-0.6509	Carbohydrate-binding domain, family V/XII
46479	-0.529321	Carboxylesterase, type B
104834	-0.62141	Caspase-1, p20
35550	0.549346	CDP-alcohol phosphatidyltransferase
90769	0.522234	CDP-alcohol phosphatidyltransferase
105491	1.38193	CDR ABC transporter
107968	-0.6509	Chitinase II
118230	0.543095	Chitinase II
100199	-0.650894	Cyclin-like F-box
88894	0.665111	Cys/Met metabolism pyridoxal-phosphate-dependent enzymes
94849	0.653154	Cytochrome b5
87334	0.667637	Cytochrome c heme-binding site
98214	-0.986116	Cytochrome c heme-binding site
102132	-1.04649	Cytochrome c heme-binding site
87334	0.667637	Cytochrome c, class I
87334	0.667637	Cytochrome c, class IA/ IB
89660	1.85005	Cytochrome P450
92219	2.51123	Cytochrome P450
97728	1.61876	Cytochrome P450
97939	-0.657863	Cytochrome P450
98329	-0.700212	Cytochrome P450
86771	0.700753	DAHP synthetase I/KDSA superfamily
95851	0.642996	Dihydroxy-acid and 6-phosphogluconate dehydratase
95851	0.642996	Dihydroxy-acid dehydratase
102132	-1.04649	Dual specificity protein phosphatase
89660	1.85005	E-class P450, group I
92219	2.51123	E-class P450, group I
97939	-0.657863	E-class P450, group I
98329	-0.700212	E-class P450, group I
104834	-0.62141	Endoplasmic reticulum targeting sequence
100707	-0.797502	Esterase/lipase/thioesterase
127291	-0.881094	Esterase/lipase/thioesterase
87716	1.03774	FAD-binding
87716	1.03774	Flavodoxin/nitric oxide synthase
87716	1.03774	Flavodoxin-like
87716	1.03774	Flavoprotein pyridine nucleotide cytochrome reductase
88597	0.566358	Gamma-glutamyltranspeptidase
25764	0.63007	Glucose/ribitol dehydrogenase
88413	0.646648	Glucose/ribitol dehydrogenase
104978	0.519383	Glutamine amidotransferase, class-II
107968	-0.6509	Glycoside hydrolase, chitinase active site
118230	0.543095	Glycoside hydrolase, chitinase active site
92219	2.51123	Glycoside hydrolase, family 16, active site
107968	-0.6509	Glycoside hydrolase, family 18
118230	0.543095	Glycoside hydrolase, family 18
58192	0.781494	Glycoside hydrolase, family 28
98866	-0.517295	Glycoside hydrolase, family 71
103443	-0.637457	GTP cyclohydrolase I
93889	1.26602	HAD-superfamily hydrolase, subfamily IA, variant 2
95282	0.616973	HAD-superfamily subfamily IB hydrolase, hypothetical 1
93889	1.26602	Haloacid dehalogenase/epoxide hydrolase
93889	1.26602	Haloacid dehalogenase-like hydrolase
89192	0.736138	HMG-CoA lyase-like
106362	2.22014	Isoflavone reductase
99131	-0.837617	Lipase, class 3
127291	-0.881094	Lipase, class 3
99512	-0.536585	Major facilitator superfamily
105544	0.706015	Mitochondrial carrier protein
88965	0.700463	Mitochondrial substrate carrier
105544	0.706015	Mitochondrial substrate carrier
106456	0.576281	Monooxygenase, FAD-binding
111314	-0.658595	Multicopper oxidase, type 1
88185	0.673018	NADH:flavin oxidoreductase/NADH oxidase
89748	2.47316	NADH:flavin oxidoreductase/NADH oxidase
88965	0.700463	NULL
97288	-0.741488	NULL
98940	-0.600449	NULL
105544	0.706015	NULL
99551	-0.721664	Octicosapeptide/Phox/Bem1p
87716	1.03774	Oxidoreductase FAD/NAD(P)-binding
96655	-0.609024	Peptidase A1, pepsin
96655	-0.609024	Peptidase aspartic, active site
99692	-0.726532	Permease for cytosine/purines, uracil, thiamine, allantoin
86771	0.700753	Phospho-2-dehydro-3-deoxyheptonate aldolase, subtype 1
90700	0.55512	Phosphoribosylaminoimidazole carboxylase, ATPase subunit
101141	0.670694	Phosphoribosylformylglycinamidine synthase, eukaryotes and proteobacteria
104978	0.519383	PPR repeat
24514	-0.669663	Protein kinase
94449	-0.658414	Protein of unknown function DUF537
90567	0.570429	Pyridoxal-5'-phosphate-dependent enzyme, beta subunit
93559	-0.908331	Pyrokinin
97634	-0.540429	RecA bacterial DNA recombination protein
114573	0.575991	Regulator of chromosome condensation, RCC1
37595	0.522578	Ribosomal L32p protein
117427	0.556891	Ribosomal protein 60S
117427	0.556891	Ribosomal protein L10
110044	0.914652	Ribosomal protein L7Ae/L30e/S12e/Gadd45
108749	0.553008	Ribosomal protein S10
108749	0.553008	Ribosomal protein S10, eukaryotic and archaeal
110044	0.914652	Ribosomal protein S12E
106002	-0.591514	Ribosomal RNA methyltransferase RrmJ/FtsJ
90567	0.570429	Serine/threonine dehydratase, pyridoxal-phosphate-binding site
24514	-0.669663	Serine/threonine protein kinase
24514	-0.669663	Serine/threonine protein kinase, active site
25764	0.63007	Short-chain dehydrogenase/reductase SDR
88413	0.646648	Short-chain dehydrogenase/reductase SDR
25159	-0.565752	SPla/RYanodine receptor SPRY
91803	-0.622861	Stem cell self-renewal protein Piwi
88413	0.646648	Sugar transporter superfamily
55267	-0.621943	Tannase and feruloyl esterase
99246	-0.801285	TEA/ATTS
99496	0.755205	Terpene synthase, metal-binding
90567	0.570429	Threonine dehydratase I
90567	0.570429	Threonine dehydratase, C-terminal
94451	0.543814	Transketolase, N terminal
114573	0.575991	Translation initiation factor IF6
24514	-0.669663	Tyrosine protein kinase
102132	-1.04649	Tyrosine specific protein phosphatase and dual
96228	0.487638	XPA
103090	0.527464	Zinc-containing alcohol dehydrogenase superfamily
102296	-0.644442	Zn-finger, C2H2 type
103805	-0.907973	Zn-finger, C2H2 type
99918	-1.06143	Zn-finger, GATA type

## Sheet: GSE69012
Differentially expressed genes among different samples of GSE69004 dataset grouped under conditions A(high lignin-low glucose) B(low lignin-high glucose) C(average lignin-average glucose) and incubated at different time periods 10-days, 20-days and 30-days.
A vs B vs C-10 days				A vs B vs C-20 days			A vs B vs C-30 days
Protein-ID	Adj. P-value	Description		Protein-ID	Adj. P-value	Description	Protein-ID	Adj. P-value	Description
88045	0.00093	AAA ATPase		102560	0.0595345	60 kDa inner membrane protein	89834	0.631	20S proteasome, A and B subunits
89920	0.00291	AAA ATPase		88651	0.004129	Amidohydrolase	92777	0.631	2Fe-2S ferredoxin, iron-sulfur binding site
95444	0.00344	AAA ATPase		88651	0.004129	Amidohydrolase-like	24756	0.631	2-nitropropane dioxygenase, NPD
88045	0.00093	AAA ATPase, central region		31390	0.0309517	Amino acid permease	105603	0.631	Actin-binding, cofilin/tropomyosin type
89920	0.00291	ABC transporter		31390	0.0309517	Amino acid permease-associated region	87332	0.631	Acyl-coA-binding protein, ACBP
95444	0.00344	ABC transporter		31390	0.0309517	Amino acid/polyamine transporter I	91272	0.631	Aldehyde dehydrogenase
102270	0.0025	ABC transporter		89909	0.0439851	Aminotransferase, class I and II	103216	0.631	Aldehyde dehydrogenase
89920	0.00291	ABC transporter, transmembrane region		104240	0.0671128	Annexin	103998	0.631	Aldehyde dehydrogenase
89240	0.00267	Acyl-CoA dehydrogenase, central region		91445	0.0133351	ATP/GTP-binding site motif A (P-loop)	102229	0.631	Aldo/keto reductase
89240	0.00267	Acyl-CoA dehydrogenase, C-terminal		92916	0.0357984	ATPase, E1-E2 type	106452	0.631	Aldo/keto reductase
89240	0.00267	Acyl-CoA dehydrogenase, N-terminal		106671	0.0426405	ATPase, E1-E2 type	98449	0.631	Ankyrin
93876	0.00545	Aflatoxin biosynthesis regulatory protein		89890	0.0595345	ATP-binding region, ATPase-like	101461	0.631	Ankyrin
22241	0.000251	Aldehyde dehydrogenase		128265	0.0583347	ATP-binding region, ATPase-like	32934	0.631	Aromatic-ring hydroxylase
97068	0.00389	Alpha/beta hydrolase		128541	0.0009706	ATP-binding region, ATPase-like	101158	0.631	Aromatic-ring hydroxylase
88651	6.46e-05	Amidohydrolase		89890	0.0595345	Bacterial sensor protein, C-terminal	103998	0.631	Bacterial extracellular solute-binding protein, family 3
88651	6.46e-05	Amidohydrolase-like		128265	0.0583347	Bacterial sensor protein, C-terminal	105156	0.631	Beta-lactamase
31390	0.000279	Amino acid permease		128541	0.0009706	Bacterial sensor protein, C-terminal	41938	0.631	Biotin/lipoate A/B protein ligase
31390	0.000279	Amino acid permease-associated region		41401	0.0454231	Band 7 protein	38113	0.631	BolA-like protein
31390	0.000279	Amino acid/polyamine transporter I		92951	0.0003806	Basic helix-loop-helix dimerisation region bHLH	90934	0.631	BTB/POZ
89909	0.000973	Aminotransferase, class I and II		93466	0.0041851	Basic-leucine zipper (bZIP) transcription factor	102417	0.631	BTB/POZ
91803	0.00392	Argonaute and Dicer protein, PAZ		93814	0.0032376	Basic-leucine zipper (bZIP) transcription factor	126101	0.631	C2
90902	0.00339	Aromatic-ring hydroxylase		117050	0.0007894	Beta G-protein (transducin)	109275	0.631	Calcium-binding EF-hand
88045	0.00093	ATP/GTP-binding site motif A (P-loop)		90475	0.0057118	BTB/POZ	125065	0.631	Calcium-binding EF-hand
89920	0.00291	ATP/GTP-binding site motif A (P-loop)		105834	0.0047255	BTB/POZ	109275	0.631	Calcium-binding protein, S-100/ICaBP type
91445	0.00668	ATP/GTP-binding site motif A (P-loop)		102551	0.0287596	C2	102237	0.631	Carbohydrate kinase, PfkB
95444	0.00344	ATP/GTP-binding site motif A (P-loop)		126101	0.0054097	C2	106838	0.631	Carboxylesterase, type B
89890	0.002	ATP-binding region, ATPase-like		99169	0.0711695	Calcium-binding EF-hand	115141	0.631	Carboxylesterase, type B
128541	6.56e-06	ATP-binding region, ATPase-like		105834	0.0047255	CAP-Gly	112311	0.631	Catalase
97757	0.00666	ATP-dependent helicase, DEAH-box		46479	0.0005852	Carboxylesterase, type B	93479	0.631	Cyclin, N-terminal
95944	0.00535	Bacterial extracellular solute-binding protein, family 3		96685	0.0377354	CBF/Mak21	93287	0.631	Cyclin-like F-box
89890	0.002	Bacterial sensor protein, C-terminal		91445	0.0133351	Cell division/GTP binding protein	98879	0.631	Cyclin-like F-box
128541	6.56e-06	Bacterial sensor protein, C-terminal		105529	0.0064346	CHCH	99915	0.631	Cyclin-like F-box
97600	0.00342	Bacterial/Archaeal inorganic pyrophosphatase		113926	0.0017516	Chitin-binding, type 1	88177	0.631	Cyclopropane-fatty-acyl-phospholipid synthase
41401	0.00214	Band 7 protein		125346	0.0005852	Chitin-binding, type 1	38091	0.631	Cytochrome b5
92951	0.000111	Basic helix-loop-helix dimerisation region bHLH		102715	0.0726171	Cof protein	94849	0.631	Cytochrome b5
103917	0.000336	Basic helix-loop-helix dimerisation region bHLH		93794	0.0146096	Cyclin-like F-box	27005	0.631	Cytochrome c heme-binding site
93814	4.17e-05	Basic-leucine zipper (bZIP) transcription factor		95326	0.0650664	Cyclin-like F-box	100204	0.631	Cytochrome c heme-binding site
36161	0.000322	BTB/POZ		97023	0.0472424	Cyclin-like F-box	102410	0.631	Cytochrome c heme-binding site
105834	0.00491	BTB/POZ		100199	0.0402229	Cyclin-like F-box	105526	0.631	Cytochrome c heme-binding site
126101	0.00413	C2		89722	0.0090832	Cysteine synthase/cystathionine beta-synthase P-phosphate-binding site	99009	0.631	Cytochrome P450
105834	0.00491	CAP-Gly		19025	0.0454862	Cytochrome c heme-binding site	105726	0.631	Cytochrome P450
46479	0.00541	Carboxylesterase, type B		102132	0.0260786	Cytochrome c heme-binding site	90894	0.631	DNA repair metallo-beta-lactamase
50078	0.00373	Carboxylesterase, type B		93709	0.0726171	Cytochrome P450	39459	0.631	D-xylulose 5-phosphate/D-fructose 6-phosphate phosphoketolase
106838	0.00292	Carboxylesterase, type B		97939	0.0172616	Cytochrome P450	19691	0.631	Dystroglycan-type cadherin-like
127015	0.00366	Carboxylesterase, type B		98329	0.0709958	Cytochrome P450	99009	0.631	E-class P450, group I
23762	0.00545	CD9/CD37/CD63 antigen		99124	0.0595345	DH	105726	0.631	E-class P450, group I
91445	0.00668	Cell division/GTP binding protein		106649	0.0068084	DH	27177	0.631	EGF-like
126595	0.00361	Chitinase II		91048	0.0454231	Dor1-like protein	97783	0.631	EGF-like
113926	0.00499	Chitin-binding, type 1		102132	0.0260786	Dual specificity protein phosphatase	105094	0.631	EGF-like
96809	0.00424	Coatomer WD associated region		93709	0.0726171	E-class P450, group I	87488	0.631	eIF4-gamma/eIF5/eIF2-epsilon
93794	0.00175	Cyclin-like F-box		95503	0.0402417	E-class P450, group I	106838	0.631	Esterase/lipase/thioesterase
89722	0.00424	Cysteine synthase/cystathionine beta-synthase P-phosphate-binding site		97939	0.0172616	E-class P450, group I	115141	0.631	Esterase/lipase/thioesterase
128099	0.00177	Cytochrome b/b6, N-terminal		98329	0.0709958	E-class P450, group I	108947	0.631	Eukaryotic initiation factor 5A hypusine (eIF-5A)
28352	0.00505	Cytochrome c heme-binding site		97926	3.66e-05	EGF-like	112560	0.631	Eukaryotic translation initiation factor SUI1
90448	0.000458	Cytochrome c heme-binding site		112082	0.0614936	eIF4-gamma/eIF5/eIF2-epsilon	92094	0.631	EVH1
102132	0.000597	Cytochrome c heme-binding site		103399	0.0454231	Endoplasmic reticulum targeting sequence	130027	0.631	Ferric reductase-like transmembrane component
102317	0.00621	Cytochrome c heme-binding site		95467	0.0019164	Esterase/lipase/thioesterase	32934	0.631	Flavoprotein monooxygenase
21733	0.00116	Cytochrome P450		110312	0.0267826	Eukaryotic ribosomal protein L5	101158	0.631	Flavoprotein monooxygenase
97939	0.00131	Cytochrome P450		112560	0.03787	Eukaryotic translation initiation factor SUI1	24756	0.631	FMN/related compound-binding core
100048	0.00327	Cytochrome P450		92094	0.0287596	EVH1	92178	0.631	Fungal transcriptional regulatory protein, N-terminal
101975	0.00446	Cytochrome P450		55666	0.0480532	FAD-dependent pyridine nucleotide-disulphide oxidoreductase	98350	0.631	GCN5-related N-acetyltransferase
97757	0.00666	DEAD/DEAH box helicase		100149	0.0638116	Filamentation induced by cAMP protein Fic	103179	0.631	GCN5-related N-acetyltransferase
99124	0.00056	DH		103290	0.07154	Fumarate lyase	89729	0.631	Generic methyltransferase
95699	0.00381	DNA mismatch repair protein MutS, C-terminal		113593	0.01119	Fungal G-protein, alpha subunit	93076	0.631	Glucose/ribitol dehydrogenase
95699	0.00381	DNA mismatch repair protein MutS, N-terminal		122782	0.0260821	Fungal G-protein, alpha subunit	87703	0.631	Glutathione S-transferase, N-terminal
99063	0.000451	DNA topoisomerase II		91105	0.0648702	Fungal specific transcription factor	95829	0.631	Glutathione S-transferase, N-terminal
102132	0.000597	Dual specificity protein phosphatase		91105	0.0648702	Fungal transcriptional regulatory protein, N-terminal	126132	0.631	Glycoside hydrolase, family 37
21733	0.00116	E-class P450, group I		92181	0.0563494	Fungal transcriptional regulatory protein, N-terminal	27847	0.631	GMC oxidoreductase
97939	0.00131	E-class P450, group I		100778	0.062696	Fungal transcriptional regulatory protein, N-terminal	108982	0.631	G-protein beta WD-40 repeat
100048	0.00327	E-class P450, group I		102271	0.0456498	FY-rich, N-terminal	95309	0.631	GTP-binding protein, HSR1-related
101975	0.00446	E-class P450, group IV		128265	0.0583347	GAF	105703	0.631	H+-transporting two-sector ATPase, alpha/beta subunit, central region
100152	0.00304	EGF-like		129974	0.0083567	GAF	42880	0.631	H+-transporting two-sector ATPase, alpha/beta subunit, C-terminal
112082	0.000789	eIF4-gamma/eIF5/eIF2-epsilon		119525	0.0001823	Glycoside hydrolase, chitinase active site	97209	0.631	Helix-turn-helix, Fis-type
95562	0.00395	Elongation factor Tu, C-terminal		113926	0.0017516	Glycoside hydrolase, family 16	100286	0.631	Helix-turn-helix, Fis-type
95833	0.00177	Emopamil-binding		116700	0.0406779	Glycoside hydrolase, family 16	93094	0.631	HhH-GPD
103399	0.00114	Endoplasmic reticulum targeting sequence		125346	0.0005852	Glycoside hydrolase, family 16	92461	0.631	Histidine acid phosphatase
101651	0.00611	Enoyl-CoA hydratase/isomerase		116700	0.0406779	Glycoside hydrolase, family 16, active site	95773	0.631	Histone-fold/TFIID-TAF/NF-Y
25380	0.00131	Esterase/lipase/thioesterase		127993	0.0260821	Glycoside hydrolase, family 35	33879	0.631	HMG-CoA lyase-like
50078	0.00373	Esterase/lipase/thioesterase		111281	0.0119169	Glycoside hydrolase, family 47	93988	0.631	HMG-I and HMG-Y, DNA-binding
95467	0.000257	Esterase/lipase/thioesterase		121831	0.048326	Glycoside hydrolase, family 5	90356	0.631	Hydantoinase B/oxoprolinase
99063	0.000451	Esterase/lipase/thioesterase		98866	0.0051324	Glycoside hydrolase, family 71	35003	0.631	HypB/UreG, nucleotide-binding
101803	0.00432	Esterase/lipase/thioesterase		117050	0.0007894	G-protein beta WD-40 repeat	96957	0.631	Immunoglobulin/major histocompatibility complex
106838	0.00292	Esterase/lipase/thioesterase		127993	0.0260821	G-protein beta WD-40 repeat	108947	0.631	KOW
127015	0.00366	Esterase/lipase/thioesterase		59950	0.0540387	G-protein, gamma subunit	41938	0.631	Lipoate-protein ligase B
127291	0.00216	Esterase/lipase/thioesterase		103443	0.0580062	GTP cyclohydrolase I	100242	0.631	Major facilitator superfamily
39481	0.000245	Eukaryotic translation initiation factor 3, subunit 7		113593	0.01119	Guanine nucleotide binding protein (G-protein), alpha	90226	0.631	Mandelate racemase/muconate lactonizing enzyme
92094	0.00534	EVH1		122782	0.0260821	Guanine nucleotide binding protein (G-protein), alpha	99325	0.631	Mis12
104195	0.00596	FAD-dependent pyridine nucleotide-disulphide oxidoreductase		102715	0.0726171	H+ transporting ATPase, proton pump	93472	0.631	N-6 Adenine-specific DNA methylase
100149	0.00542	Filamentation induced by cAMP protein Fic		106649	0.0068084	H+-transporting two-sector ATPase, alpha/beta subunit, central	126132	0.631	Neutral trehalase Ca2+ binding
23306	0.000482	Flavin-containing monooxygenase FMO		93889	0.0298268	HAD-superfamily hydrolase, subfamily IA, variant 2	93718	0.631	Nuclear protein G9a
90902	0.00339	Flavoprotein monooxygenase		93889	0.0298268	Haloacid dehalogenase/epoxide hydrolase	86766	0.631	NULL
100649	0.000451	Forkhead-associated		92916	0.0357984	Haloacid dehalogenase-like hydrolase	89525	0.631	NULL
113593	0.000482	Fungal G-protein, alpha subunit		93889	0.0298268	Haloacid dehalogenase-like hydrolase	90945	0.631	NULL
122782	0.00216	Fungal G-protein, alpha subunit		93794	0.0146096	HEAT	100109	0.631	NULL
93876	0.00545	Fungal transcriptional regulatory protein, N-terminal		38710	0.0216659	Heat shock factor (HSF)-type, DNA-binding	100123	0.631	NULL
89996	0.00239	Glucose/ribitol dehydrogenase		126525	0.0330136	Heat shock factor (HSF)-type, DNA-binding	101469	0.631	NULL
33280	0.000597	Glutamate-cysteine ligase catalytic subunit		93510	0.0503423	Heat shock protein DnaJ, N-terminal	102229	0.631	NULL
128099	0.00177	Glycoside hydrolase family 2, immunoglobulin-like beta-sandwich domain		95893	0.0157284	Heat shock protein DnaJ, N-terminal	102330	0.631	NULL
129476	5.59e-05	Glycoside hydrolase family 2, immunoglobulin-like beta-sandwich domain		97209	0.0563494	Helix-turn-helix, Fis-type	103793	0.631	NULL
119525	0.00166	Glycoside hydrolase, chitinase active site		89890	0.0595345	Histidine kinase	112560	0.631	NULL
126595	0.00361	Glycoside hydrolase, chitinase active site		128265	0.0583347	Histidine kinase	121932	0.631	NULL
120395	0.00397	Glycoside hydrolase, clan GH-D		128541	0.0009706	Histidine kinase	122430	0.631	NULL
113926	0.00499	Glycoside hydrolase, family 16		89890	0.0595345	Histidine kinase A, N-terminal	126101	0.631	NULL
126595	0.00361	Glycoside hydrolase, family 18		128265	0.0583347	Histidine kinase A, N-terminal	100414	0.631	Paired amphipathic helix
120395	0.00397	Glycoside hydrolase, family 27		128541	0.0009706	Histidine kinase A, N-terminal	109275	0.631	Parvalbumin
107557	0.00155	Glycoside hydrolase, family 3, C-terminal		129974	0.0083567	Histidine kinase A, N-terminal	96022	0.631	Peptidase aspartic, active site
128500	0.00304	Glycoside hydrolase, family 3, C-terminal		89890	0.0595345	Histidine kinase, HAMP region	96518	0.631	Peptidase C48, SUMO/Sentrin/Ubl1
107557	0.00155	Glycoside hydrolase, family 3, N-terminal		128541	0.0009706	Histidine kinase, HAMP region	99524	0.631	Peptidase M, neutral zinc metallopeptidases, zinc-binding site
128500	0.00304	Glycoside hydrolase, family 3, N-terminal		104147	0.0579401	HMG1/2 (high mobility group) box	95403	0.631	Peptidase S8 and S53, subtilisin, kexin, sedolisin
111281	0.00103	Glycoside hydrolase, family 47		98870	0.0058491	Homeobox	89834	0.631	Peptidase T1A, proteasome beta-subunit
29843	0.00413	Glycoside hydrolase, family 5		45959	0.0260821	Hpt	86766	0.631	Peptidylprolyl isomerase, FKBP-type
109871	0.00594	Glycoside hydrolase, family 5		38710	0.0216659	HSF/ETS, DNA-binding	91272	0.631	Phosphopantetheine-binding
98866	0.000649	Glycoside hydrolase, family 71		126525	0.0330136	HSF/ETS, DNA-binding	89743	0.631	Phox-like
99813	0.00118	GPR1/FUN34/yaaH		42688	0.0525111	Hypoxia induced protein conserved region	126101	0.631	PKN/rhophilin/rhotekin rho-binding repeat
96809	0.00424	G-protein beta WD-40 repeat		105259	0.0711161	IQ calmodulin-binding region	107989	0.631	Plectin/S10, N-terminal
99007	0.00594	G-protein beta WD-40 repeat		90475	0.0057118	Lipocalin-related protein and Bos/Can/Equ allergen	89525	0.631	Pre-mRNA splicing protein
108982	0.0045	G-protein beta WD-40 repeat		95326	0.0650664	Lipocalin-related protein and Bos/Can/Equ allergen	59912	0.631	Protein kinase
102647	0.00425	Guanine nucleotide binding protein (G-protein), alpha subunit		105792	0.0068868	Lipocalin-related protein and Bos/Can/Equ allergen	96277	0.631	Protein kinase
103790	0.00486	Guanine nucleotide binding protein (G-protein), alpha subunit		95467	0.0019164	Lipolytic enzyme	98359	0.631	Protein kinase
108707	0.0017	Guanine nucleotide binding protein (G-protein), alpha subunit		90226	0.0112232	Mandelate racemase/muconate lactonizing enzyme	99264	0.631	Protein kinase
113593	0.000482	Guanine nucleotide binding protein (G-protein), alpha subunit		88616	0.0022713	MAP kinase	100242	0.631	Protein kinase
122782	0.00216	Guanine nucleotide binding protein (G-protein), alpha subunit		33008	0.0591698	Mg2+ transporter protein, CorA-like	104827	0.631	Protein kinase
39481	0.000245	H+-transporting two-sector ATPase, alpha/beta subunit, central region		25577	0.0599728	MT-A70	126101	0.631	Protein kinase
99840	0.00511	H+-transporting two-sector ATPase, alpha/beta subunit, central region		47589	0.0638116	Multicopper oxidase, copper-binding site	126101	0.631	Protein kinase C, phorbol ester/diacylglycerol binding
93794	0.00175	HEAT		47589	0.0638116	Multicopper oxidase, type 1	126101	0.631	Protein kinase, C-terminal
38710	0.00228	Heat shock factor (HSF)-type, DNA-binding		37460	0.0446347	Nitrilase/cyanide hydratase and apolipoprotein N-acyltransferase	91313	0.631	Protein of unknown function DUF427
126525	0.00143	Heat shock factor (HSF)-type, DNA-binding		106586	0.0454231	Nucleotide binding protein, PINc	36449	0.631	Protein of unknown function DUF59
97757	0.00666	Helicase, C-terminal		92951	0.0003806	NULL	96500	0.631	Protein of unknown function UPF0031
97757	0.00666	Helicase-associated region		94507	0.0004176	NULL	87845	0.631	Protein of unknown function UPF0041
89890	0.002	Histidine kinase		96364	0.0072423	NULL	19691	0.631	Putative Ig
128541	6.56e-06	Histidine kinase		100109	0.07154	NULL	92094	0.631	RanBP1
89890	0.002	Histidine kinase A, N-terminal		112560	0.03787	NULL	87823	0.631	Ras GTPase
128541	6.56e-06	Histidine kinase A, N-terminal		126101	0.0054097	NULL	87823	0.631	Ras small GTPase, Rab type
89890	0.002	Histidine kinase, HAMP region		94763	0.0447721	OB-fold nucleic acid binding	87823	0.631	Ras small GTPase, Ras type
128541	6.56e-06	Histidine kinase, HAMP region		99551	0.0031491	Octicosapeptide/Phox/Bem1p	87823	0.631	Ras small GTPase, Rho type
104147	0.00345	HMG1/2 (high mobility group) box		88616	0.0022713	p38 MAP kinase	109275	0.631	Recoverin
106191	0.00424	Homeobox		107196	0.0133351	PAS	125065	0.631	Recoverin
122457	0.00177	Homeobox		95735	0.0447406	Peptidase A1, pepsin	113637	0.631	Ribosomal L18ae protein
38710	0.00228	HSF/ETS, DNA-binding		95735	0.0447406	Peptidase aspartic, active site	107252	0.631	Ribosomal L23 protein
126525	0.00143	HSF/ETS, DNA-binding		95537	0.0155817	Peptidase M, neutral zinc metallopeptidases, zinc-binding	87004	0.631	Ribosomal L28e protein
115304	0.00117	Initiation factor 2B		92916	0.0357984	Phospholipid-translocating P-type ATPase, flippase	86865	0.631	Ribosomal L38e protein
97600	0.00342	Inorganic pyrophosphatase		96364	0.0072423	Phosphopantetheine attachment site	118567	0.631	Ribosomal protein L1
102050	0.00437	KH		126101	0.0054097	PKN/rhophilin/rhotekin rho-binding repeat	116657	0.631	Ribosomal protein L10E
102050	0.00437	KH, type 1		99124	0.0595345	Pleckstrin/ G-protein, interacting region	119976	0.631	Ribosomal protein L13
25380	0.00131	Lipase, active site		116123	0.0031171	Polysaccharide deacetylase	119976	0.631	Ribosomal protein L13, archea and eukaryotic form
25380	0.00131	Lipase, class 3		41401	0.0454231	Prohibitin	123449	0.631	Ribosomal protein L14b/L23e
99131	0.0057	Lipase, class 3		22049	0.0585621	Protein kinase	107545	0.631	Ribosomal protein L19e
127291	0.00216	Lipase, class 3		22788	0.0599728	Protein kinase	125577	0.631	Ribosomal protein L21e
105792	0.00541	Lipocalin-related protein and Bos/Can/Equ allergen		23485	0.0357249	Protein kinase	117488	0.631	Ribosomal protein L22/L17
95467	0.000257	Lipolytic enzyme		36953	0.0005852	Protein kinase	117488	0.631	Ribosomal protein L22/L17, eukaryotic and archaeal form
99912	0.00422	Major facilitator superfamily		38296	0.0480532	Protein kinase	107252	0.631	Ribosomal protein L23, N-terminal
106546	0.00181	Major facilitator superfamily		40438	0.0627159	Protein kinase	126854	0.631	Ribosomal protein L29
41698	0.0052	Metallophosphoesterase		88616	0.0022713	Protein kinase	95311	0.631	Ribosomal protein L31
122457	0.00177	Metallophosphoesterase		90009	0.0573634	Protein kinase	118968	0.631	Ribosomal protein L31e
90902	0.00339	Monooxygenase, FAD-binding		92391	0.0450673	Protein kinase	116399	0.631	Ribosomal protein L35Ae
106456	4.17e-05	Monooxygenase, FAD-binding		99169	0.0711695	Protein kinase	121932	0.631	Ribosomal protein L37e
95699	0.00381	MutS III		107196	0.0133351	Protein kinase	122430	0.631	Ribosomal protein L44E
103590	0.00616	Myb, DNA-binding		112228	0.0045556	Protein kinase	110044	0.631	Ribosomal protein L7Ae/L30e/S12e/Gadd45
90902	0.00339	NAD-binding site		113052	0.0550899	Protein kinase	108749	0.631	Ribosomal protein S10
37460	0.00419	Nitrilase/cyanide hydratase and apolipoprotein N-acyltransferase		126101	0.0054097	Protein kinase	108749	0.631	Ribosomal protein S10, eukaryotic and archaeal form
106586	0.000786	Nucleotide binding protein, PINc		128265	0.0583347	Protein kinase	96499	0.631	Ribosomal protein S12/S23
92951	0.000111	NULL		19025	0.0454862	Protein kinase C, phorbol ester/diacylglycerol binding	110044	0.631	Ribosomal protein S12E
94507	0.000338	NULL		126101	0.0054097	Protein kinase C, phorbol ester/diacylglycerol binding	126006	0.631	Ribosomal protein S13
96364	0.00108	NULL		107196	0.0133351	Protein kinase, C-terminal	121649	0.631	Ribosomal protein S14
102330	0.00655	NULL		126101	0.0054097	Protein kinase, C-terminal	124285	0.631	Ribosomal protein S15
103917	0.000336	NULL		35906	0.0294407	Protein of unknown function DUF589	93331	0.631	Ribosomal protein S2
115304	0.00117	NULL		89628	0.0343148	Protein of unknown function DUF605	112250	0.631	Ribosomal protein S21e
126101	0.00413	NULL		41078	0.03787	Protein of unknown function DUF92	122416	0.631	Ribosomal protein S26E
100741	0.00179	Oligopeptide transporter OPT superfamily		37460	0.0446347	Protein of unknown function UPF0012	107500	0.631	Ribosomal protein S27a
99730	0.00171	Oxidoreductase, C-terminal		95326	0.0650664	Protein prenyltransferase, alpha subunit	110081	0.631	Ribosomal protein S3, C-terminal
99730	0.00171	Oxidoreductase, N-terminal		127378	0.0054097	Putative phosphatase regulatory subunit	115875	0.631	Ribosomal protein S3Ae
106711	0.00353	PAP/25A core		55666	0.0480532	Pyridine nucleotide-disulphide oxidoreductase, class I	119766	0.631	Ribosomal protein S5
106711	0.00353	PAP/25A-associated		89722	0.0090832	Pyridoxal-5'-phosphate-dependent enzyme, beta subunit	119766	0.631	Ribosomal protein S5, C-terminal
91795	0.00582	Peptidase A1, pepsin		92094	0.0287596	RanBP1	119766	0.631	Ribosomal protein S5, eukaryotic and archaeal form
95735	0.00392	Peptidase A1, pepsin		87823	0.0211366	Ras GTPase	124586	0.631	Ribosomal protein S7E
91795	0.00582	Peptidase aspartic, active site		87823	0.0211366	Ras small GTPase, Rab type	117809	0.631	Ribosomal protein S9
95735	0.00392	Peptidase aspartic, active site		87823	0.0211366	Ras small GTPase, Ras type	28688	0.631	RNA-binding region RNP-1 (RNA recognition motif)
101297	0.00283	Peptidase aspartic, active site		87823	0.0211366	Ras small GTPase, Rho type	87425	0.631	RNA-binding region RNP-1 (RNA recognition motif)
95537	0.00576	Peptidase M, neutral zinc metallopeptidases, zinc-binding site		98811	0.0021203	RasGAP	102353	0.631	RNA-binding region RNP-1 (RNA recognition motif)
97068	0.00389	Peptidase M, neutral zinc metallopeptidases, zinc-binding site		89890	0.0595345	Response regulator receiver	28140	0.631	RPEL repeat
89929	0.00173	Peptidase M24		107196	0.0133351	Response regulator receiver	97028	0.631	RTA1 like protein
89929	0.00173	Peptidase M24, methionine aminopeptidase		126525	0.0330136	Response regulator receiver	109937	0.631	S25 ribosomal protein
89929	0.00173	Peptidase M24A, methionine aminopeptidase, subfamily 1		128265	0.0583347	Response regulator receiver	88860	0.631	SAM (and some other nucleotide) binding motif
88045	0.00093	Peptidase S16, active site		129974	0.0083567	Response regulator receiver	89729	0.631	SAM (and some other nucleotide) binding motif
88045	0.00093	Peptidase S16, ATP-dependent protease La		19025	0.0454862	RhoGAP	59912	0.631	Serine/threonine protein kinase
88045	0.00093	Peptidase S16, lon C-terminal		96442	0.0457949	RhoGAP	99264	0.631	Serine/threonine protein kinase
88045	0.00093	Peptidase S16, lon protease		116657	0.0260821	Ribosomal protein L10E	100242	0.631	Serine/threonine protein kinase
37428	0.0061	Permease for cytosine/purines, uracil, thiamine, allantoin		109092	0.0386043	Ribosomal protein L13e	126101	0.631	Serine/threonine protein kinase
96364	0.00108	Phosphopantetheine attachment site		110312	0.0267826	Ribosomal protein L18P/L5E	59912	0.631	Serine/threonine protein kinase, active site
126101	0.00413	PKN/rhophilin/rhotekin rho-binding repeat		118968	0.065425	Ribosomal protein L31e	99264	0.631	Serine/threonine protein kinase, active site
99124	0.00056	Pleckstrin/ G-protein, interacting region		123776	0.001412	Ribosomal protein L7A	100242	0.631	Serine/threonine protein kinase, active site
116123	0.00132	Polysaccharide deacetylase		115875	0.0728502	Ribosomal protein S3Ae	126101	0.631	Serine/threonine protein kinase, active site
41401	0.00214	Prohibitin		115549	0.0612183	Ribosomal protein S6e	37762	0.631	Signal recognition particle 9 kDa
23637	0.00366	Protein kinase		116171	0.0711161	Ribosomal protein S7	87823	0.631	Small GTP-binding protein domain
24514	0.00203	Protein kinase		116171	0.0711161	Ribosomal protein S7, eukaryotic and archaeal	38500	0.631	Small nuclear ribonucleoprotein (Sm protein)
36953	9.46e-07	Protein kinase		27952	0.0021219	RNA polymerase Rpb1, domain 7	87459	0.631	Small nuclear ribonucleoprotein (Sm protein)
89016	0.00177	Protein kinase		87425	0.07154	RNA-binding region RNP-1 (RNA recognition motif)	93796	0.631	Small nuclear ribonucleoprotein (Sm protein)
90009	0.000529	Protein kinase		28140	0.0012038	RPEL repeat	38500	0.631	snRNP
93961	0.00465	Protein kinase		93510	0.0503423	Sec63	87459	0.631	snRNP
102050	0.00437	Protein kinase		105529	0.0064346	SEC7-like	102612	0.631	Spc97/Spc98
112228	0.00578	Protein kinase		86846	0.0023774	SecY protein	97474	0.631	Stem cell self-renewal protein Piwi
112798	0.00136	Protein kinase		106137	0.0031503	Sel1-like repeat	42862	0.631	Thioredoxin domain 2
126101	0.00413	Protein kinase		22049	0.0585621	Serine/threonine protein kinase	89525	0.631	Thioredoxin domain 2
126101	0.00413	Protein kinase C, phorbol ester/diacylglycerol binding		22788	0.0599728	Serine/threonine protein kinase	42862	0.631	Thioredoxin-related
112798	0.00136	Protein kinase, C-terminal		23485	0.0357249	Serine/threonine protein kinase	112560	0.631	Translation initiation factor SUI1
126101	0.00413	Protein kinase, C-terminal		88616	0.0022713	Serine/threonine protein kinase	59912	0.631	Tyrosine protein kinase
37460	0.00419	Protein of unknown function UPF0012		90009	0.0573634	Serine/threonine protein kinase	99264	0.631	Tyrosine protein kinase
101303	0.00577	P-type trefoil		107196	0.0133351	Serine/threonine protein kinase	100242	0.631	Tyrosine protein kinase
106250	0.00478	P-type trefoil		112228	0.0045556	Serine/threonine protein kinase	126101	0.631	Tyrosine protein kinase
127378	0.000893	Putative phosphatase regulatory subunit		113052	0.0550899	Serine/threonine protein kinase	98359	0.631	Tyrosine protein kinase, active site
89722	0.00424	Pyridoxal-5'-phosphate-dependent enzyme, beta subunit		126101	0.0054097	Serine/threonine protein kinase	103723	0.631	Tyrosine protein kinase, active site
92094	0.00534	RanBP1		22049	0.0585621	Serine/threonine protein kinase, active site	103727	0.631	Tyrosine protein kinase, active site
87823	0.00244	Ras GTPase		22788	0.0599728	Serine/threonine protein kinase, active site	89729	0.631	UbiE/COQ5 methyltransferase
87823	0.00244	Ras small GTPase, Rab type		23485	0.0357249	Serine/threonine protein kinase, active site	107500	0.631	Ubiquitin
87823	0.00244	Ras small GTPase, Ras type		36953	0.0005852	Serine/threonine protein kinase, active site	105693	0.631	Ubiquitin-conjugating enzymes
87823	0.00244	Ras small GTPase, Rho type		88616	0.0022713	Serine/threonine protein kinase, active site	35003	0.631	Urease accessory protein UreG
98811	0.00253	RasGAP		107196	0.0133351	Serine/threonine protein kinase, active site	23660	0.631	von Willebrand factor, type A
102050	0.00437	Replication factor C conserved region		112228	0.0045556	Serine/threonine protein kinase, active site	90353	0.631	Zinc-containing alcohol dehydrogenase superfamily
89890	0.002	Response regulator receiver		113052	0.0550899	Serine/threonine protein kinase, active site	43009	0.631	Zn-finger, C2H2 type
126525	0.00143	Response regulator receiver		126101	0.0054097	Serine/threonine protein kinase, active site	92965	0.631	Zn-finger, C2H2 type
91305	0.00365	Rhodopsin-like GPCR superfamily		104636	0.0599728	Short-chain dehydrogenase/reductase SDR	94570	0.631	Zn-finger, C2H2 type
96442	0.00236	RhoGAP		87823	0.0211366	Small GTP-binding protein domain	100111	0.631	Zn-finger, C2H2 type
20877	0.00183	Ribosomal protein S2		25577	0.0599728	Sugar transporter superfamily	100132	0.631	Zn-finger, C2H2 type
116171	0.00615	Ribosomal protein S7		93794	0.0146096	TBP-interacting 120	100204	0.631	Zn-finger, C2H2 type
116171	0.00615	Ribosomal protein S7, eukaryotic and archaeal form		87630	0.0675502	Thiolase	100214	0.631	Zn-finger, C2H2 type
27952	0.0016	RNA polymerase Rpb1, domain 7		98101	0.0667268	TPR repeat	100266	0.631	Zn-finger, C2H2 type
35413	0.00208	RNA-binding region RNP-1 (RNA recognition motif)		106137	0.0031503	TPR repeat	103576	0.631	Zn-finger, C2H2 type
96809	0.00424	RNA-binding region RNP-1 (RNA recognition motif)		93466	0.0041851	Transcription factor Jun	104814	0.631	Zn-finger, C2H2 type
86846	0.00436	SecY protein		112082	0.0614936	Translation initiation factor IF5	105144	0.631	Zn-finger, C2H2 type
23637	0.00366	Serine/threonine protein kinase		112560	0.03787	Translation initiation factor SUI1	105147	0.631	Zn-finger, C2H2 type
24514	0.00203	Serine/threonine protein kinase		22049	0.0585621	Tyrosine protein kinase	105703	0.631	Zn-finger, C2H2 type
89016	0.00177	Serine/threonine protein kinase		22788	0.0599728	Tyrosine protein kinase	26183	0.631	Zn-finger, CCHC type
90009	0.000529	Serine/threonine protein kinase		23485	0.0357249	Tyrosine protein kinase	92128	0.631	Zn-finger, CCHC type
93961	0.00465	Serine/threonine protein kinase		88616	0.0022713	Tyrosine protein kinase	92754	0.631	Zn-finger, CCHC type
102050	0.00437	Serine/threonine protein kinase		90009	0.0573634	Tyrosine protein kinase	94597	0.631	Zn-finger, CCHC type
112228	0.00578	Serine/threonine protein kinase		107196	0.0133351	Tyrosine protein kinase	95965	0.631	Zn-finger, CCHC type
112798	0.00136	Serine/threonine protein kinase		112228	0.0045556	Tyrosine protein kinase	96591	0.631	Zn-finger, CCHC type
126101	0.00413	Serine/threonine protein kinase		113052	0.0550899	Tyrosine protein kinase	98310	0.631	Zn-finger, CCHC type
23637	0.00366	Serine/threonine protein kinase, active site		126101	0.0054097	Tyrosine protein kinase	98588	0.631	Zn-finger, CCHC type
24514	0.00203	Serine/threonine protein kinase, active site		41505	0.0697153	Tyrosine protein kinase, active site	98768	0.631	Zn-finger, CCHC type
36953	9.46e-07	Serine/threonine protein kinase, active site		93972	0.0658846	Tyrosine protein kinase, active site	98935	0.631	Zn-finger, CCHC type
89016	0.00177	Serine/threonine protein kinase, active site		102132	0.0260786	Tyrosine specific protein phosphatase and dual	100609	0.631	Zn-finger, CCHC type
102050	0.00437	Serine/threonine protein kinase, active site		35007	0.0133351	UbiA prenyltransferase	100779	0.631	Zn-finger, CCHC type
112228	0.00578	Serine/threonine protein kinase, active site		101173	0.0370015	Ubiquitin system component Cue	100817	0.631	Zn-finger, CCHC type
112798	0.00136	Serine/threonine protein kinase, active site		91453	0.0554799	Universal stress protein (Usp)	102522	0.631	Zn-finger, CCHC type
126101	0.00413	Serine/threonine protein kinase, active site		91453	0.0554799	UspA	103587	0.631	Zn-finger, CCHC type
41698	0.0052	Serine/threonine-specific protein phosphatase and bis(5-nucleosyl)-tetraphosphatase		63152	0.0293082	Vasopressin V2 receptor	105778	0.631	Zn-finger, CCHC type
122457	0.00177	Serine/threonine-specific protein phosphatase and bis(5-nucleosyl)-tetraphosphatase		95893	0.0157284	Vitamin K-dependent carboxylation/gamma-carboxyglutamic region	105922	0.631	Zn-finger, CCHC type
102270	0.0025	SH3		19025	0.0454862	Zn-binding protein, LIM	105693	0.631	Zn-finger, modified RING
89996	0.00239	Short-chain dehydrogenase/reductase SDR		96442	0.0457949	Zn-binding protein, LIM	91707	0.631	Zn-finger, MYND type
87823	0.00244	Small GTP-binding protein domain		93084	0.0059156	Zn-finger, C2H2 type	96957	0.631	Zn-finger-like, PHD finger
91803	0.00392	Stem cell self-renewal protein Piwi		100130	0.0667268	Zn-finger, C2H2 type
102050	0.00437	Sugar transporter superfamily		100149	0.0638116	Zn-finger, C2H2 type
93794	0.00175	TBP-interacting 120		105108	0.0665706	Zn-finger, C2H2 type
100741	0.00179	Tetrapeptide transporter, OPT1/isp4		26183	0.053955	Zn-finger, CCHC type
23762	0.00545	Tetraspanin		63152	0.0293082	Zn-finger, CCHC type
87630	0.00278	Thiolase		99918	0.0389606	Zn-finger, GATA type
112082	0.000789	Translation initiation factor IF5
23637	0.00366	Tyrosine protein kinase
24514	0.00203	Tyrosine protein kinase
89016	0.00177	Tyrosine protein kinase
90009	0.000529	Tyrosine protein kinase
93961	0.00465	Tyrosine protein kinase
102050	0.00437	Tyrosine protein kinase
112228	0.00578	Tyrosine protein kinase
112798	0.00136	Tyrosine protein kinase
126101	0.00413	Tyrosine protein kinase
102132	0.000597	Tyrosine specific protein phosphatase and dual specificity
35007	0.00339	UbiA prenyltransferase
94247	0.00297	UbiA prenyltransferase
91453	0.00247	Universal stress protein (Usp)
91453	0.00247	UspA
93958	0.00625	Zinc-containing alcohol dehydrogenase superfamily
96442	0.00236	Zn-binding protein, LIM
93084	0.00452	Zn-finger, C2H2 type
98319	0.00471	Zn-finger, C2H2 type
100130	0.00545	Zn-finger, C2H2 type
100149	0.00542	Zn-finger, C2H2 type
100268	0.00461	Zn-finger, C2H2 type
102317	0.00621	Zn-finger, C2H2 type
103590	0.00616	Zn-finger, C2H2 type
105714	0.0025	Zn-finger, C2H2 type
98588	0.00529	Zn-finger, CCHC type
101303	0.00577	Zn-finger, CCHC type
102345	0.00365	Zn-finger, CCHC type
106043	0.00149	Zn-finger, CCHC type
96448	0.00287	Zn-finger, C-x8-C-x5-C-x3-H type
28204	8.12e-05	Zn-finger, GATA type
90448	0.000458	Zn-finger, GATA type
99918	0.000374	Zn-finger, GATA type
91095	0.00366	Zn-finger, MYND type
96448	0.00287	Zn-finger, RING

## Sheet: GSE84529
Differentially expressed genes among different samples of GSE84529 dataset grouped under conditions 0mm to 5mm, 15mm to 20mm and 30mm to 35mm, based on the hyphal region selected from the wood wafers.
30mm-35mm vs 0mm to 5mm			15mm-20mm vs 0mm to 5mm			30mm-35mm vs 15mm to 20mm
Protein-ID	Log FC	Description	Protein-ID	Log FC	Description	Protein-ID	Log FC	Description
24756	-3.39248	2-nitropropane dioxygenase, NPD	95099	1.07942	1-aminocyclopropane-1-carboxylate synthase	24756	0.89719	2-nitropropane dioxygenase, NPD
28683	-2.70805	2-nitropropane dioxygenase, NPD	24756	-2.49529	2-nitropropane dioxygenase, NPD	28683	0.964994	2-nitropropane dioxygenase, NPD
33925	2.45785	2OG-Fe(II) oxygenase superfamily	28683	-1.74305	2-nitropropane dioxygenase, NPD	33925	-0.629353	2OG-Fe(II) oxygenase superfamily
34407	1.98236	2OG-Fe(II) oxygenase superfamily	33925	1.8285	2OG-Fe(II) oxygenase superfamily	96895	1.52682	2OG-Fe(II) oxygenase superfamily
89000	3.69576	2OG-Fe(II) oxygenase superfamily	89000	3.21406	2OG-Fe(II) oxygenase superfamily	96901	0.757192	2OG-Fe(II) oxygenase superfamily
93264	2.55872	2OG-Fe(II) oxygenase superfamily	93264	2.14832	2OG-Fe(II) oxygenase superfamily	88480	-0.616903	AAA ATPase
90796	-1.65401	3-beta hydroxysteroid dehydrogenase/isomerase	96895	2.78587	2OG-Fe(II) oxygenase superfamily	90864	0.768665	AAA ATPase
94333	-1.77209	3-beta hydroxysteroid dehydrogenase/isomerase	96901	2.45406	2OG-Fe(II) oxygenase superfamily	88480	-0.616903	ABC transporter
88727	-1.26319	3-hydroxyacyl-CoA dehydrogenase, C-terminal	90796	-1.81783	3-beta hydroxysteroid dehydrogenase/isomerase	88480	-0.616903	ABC transporter, transmembrane region
88727	-1.26319	3-hydroxyacyl-CoA dehydrogenase, NAD-binding	94333	-1.65675	3-beta hydroxysteroid dehydrogenase/isomerase	96029	-1.02883	Acylphosphatase
29770	-1.54033	5'3'-Exonuclease N- and I-domain	21677	-2.49006	AAA ATPase	90928	-0.627129	Aerolysin/hemolysin toxin
88480	1.85042	AAA ATPase	87616	1.1469	AAA ATPase	88083	-0.672724	Aldo/keto reductase
90864	-2.11359	AAA ATPase	88480	1.23352	AAA ATPase	90503	0.778784	Aldo/keto reductase
93865	-1.62981	AAA ATPase	90864	-1.34493	AAA ATPase	28441	1.19384	Allergen V5/Tpx-1 related
88480	1.85042	ABC transporter	93865	-1.34125	AAA ATPase	92881	0.751179	Alpha amylase, catalytic region
93865	-1.62981	ABC transporter	87616	1.1469	ABC transporter	110441	-0.747671	Alpha amylase, catalytic region
88480	1.85042	ABC transporter, transmembrane region	88480	1.23352	ABC transporter	92881	0.751179	Alpha amylase, catalytic subdomain
93865	-1.62981	ABC transporter, transmembrane region	93865	-1.34125	ABC transporter	110441	-0.747671	Alpha amylase, catalytic subdomain
96029	2.14094	Acylphosphatase	88480	1.23352	ABC transporter, transmembrane region	100251	0.864385	Alpha-L-arabinofuranosidase, C-terminal
88965	-1.64428	Adenine nucleotide translocator 1	93865	-1.34125	ABC transporter, transmembrane region	98034	-1.05819	Amino acid permease
90928	-3.01519	Aerolysin/hemolysin toxin	95040	1.30564	Acetamidase/Formamidase	98034	-1.05819	Amino acid permease-associated region
93876	2.1486	Aflatoxin biosynthesis regulatory protein	87730	1.15984	Acetate and butyrate kinase	98034	-1.05819	Amino acid/polyamine transporter I
22241	-2.1634	Aldehyde dehydrogenase	87730	1.15984	Acetate kinase	90864	0.768665	Aminoacyl-tRNA synthetase, class I
89252	1.94218	Aldehyde dehydrogenase	97010	1.71705	Actin-binding, actinin-type	90902	1.68058	Aromatic-ring hydroxylase
89721	2.95346	Aldehyde dehydrogenase	97821	1.31505	Acyl-CoA dehydrogenase	98224	-0.696615	Aromatic-ring hydroxylase
23404	2.29934	Aldo/keto reductase	88965	-1.60668	Adenine nucleotide translocator 1	101011	1.98612	Aromatic-ring hydroxylase
37079	2.28051	Aldo/keto reductase	98749	2.45212	Adenine nucleotide translocator 1	88480	-0.616903	ATP/GTP-binding site motif A (P-loop)
41324	1.68933	Aldo/keto reductase	90928	-3.64232	Aerolysin/hemolysin toxin	100086	-0.677217	ATP/GTP-binding site motif A (P-loop)
87727	3.29158	Aldo/keto reductase	93876	2.04201	Aflatoxin biosynthesis regulatory protein	100468	-0.751626	Basic-leucine zipper (bZIP) transcription factor
88083	3.11192	Aldo/keto reductase	22241	-2.25846	Aldehyde dehydrogenase	38576	-0.853244	BolA-like protein
90625	1.61867	Aldo/keto reductase	89252	1.64183	Aldehyde dehydrogenase	94239	-0.630487	BTB/POZ
90627	1.20389	Aldo/keto reductase	89721	3.1793	Aldehyde dehydrogenase	100964	0.676195	BTB/POZ
90748	1.28849	Aldo/keto reductase	23404	2.32636	Aldo/keto reductase	104796	1.19596	BTB/POZ
28441	-4.34229	Allergen V5/Tpx-1 related	37079	2.18375	Aldo/keto reductase	24260	-1.02566	C2
39937	-2.79269	Alpha amylase, catalytic region	41324	1.60256	Aldo/keto reductase	99466	-0.711649	C-5 cytosine-specific DNA methylase
39937	-2.79269	Alpha amylase, catalytic subdomain	87727	3.65471	Aldo/keto reductase	88514	-2.54087	Caleosin related
87770	-3.00547	Alpha/beta hydrolase	88083	2.43919	Aldo/keto reductase	20448	0.686342	Carboxylesterase, type B
24214	1.76664	Alpha/beta hydrolase fold	90625	1.64443	Aldo/keto reductase	93978	0.710745	Carboxylesterase, type B
87770	-3.00547	Alpha/beta hydrolase fold	90748	1.48716	Aldo/keto reductase	103519	-0.884656	Caspase-1, p20
53527	1.76858	Amidohydrolase-like	96914	3.94439	Aldo/keto reductase	99098	-1.82775	Catalase
20755	-1.50995	Amine oxidase	97423	2.74343	Aldo/keto reductase	99098	-1.82775	Catalase-related
90864	-2.11359	Aminoacyl-tRNA synthetase, class I	100319	1.85268	Aldo/keto reductase	98960	-0.719548	Citrate synthase
94877	1.43605	Aminoacyl-tRNA synthetase, class I	28441	-3.14844	Allergen V5/Tpx-1 related	88652	-0.606962	Class I peptide chain release factor
88877	-1.79407	Aminotransferase, class I and II	39937	-2.83118	Alpha amylase, catalytic region	88849	-1.03956	CsbD-like
89909	1.63322	Aminotransferase, class I and II	39937	-2.83118	Alpha amylase, catalytic subdomain	94683	1.15991	Cyclin-like F-box
36768	1.29901	Aminotransferase, class IV	87770	-2.29944	Alpha/beta hydrolase	98021	-0.801789	Cyclin-like F-box
88877	-1.79407	Aminotransferase, class-II	87770	-2.29944	Alpha/beta hydrolase fold	98707	1.03694	Cyclin-like F-box
92689	-3.79893	AMP-dependent synthetase and ligase	100251	1.79322	Alpha-L-arabinofuranosidase, C-terminal	99875	0.600715	Cyclin-like F-box
22746	2.51121	Ankyrin	99906	2.0989	Amidase	99970	-0.807375	Cyclin-like F-box
40396	-3.03862	Ankyrin	100076	2.77455	Amidase	104384	0.672289	Cyclin-like F-box
87743	2.39346	Ankyrin	53527	1.90305	Amidohydrolase-like	88894	-0.783369	Cys/Met metabolism pyridoxal-phosphate-dependent enzymes
89619	-2.88544	Ankyrin	20755	-1.73202	Amine oxidase	42874	-1.39397	Cytochrome b5
92699	1.44247	Ankyrin	90864	-1.34493	Aminoacyl-tRNA synthetase, class I	106657	0.848575	Cytochrome b5
95532	-2.7677	Ankyrin	94877	1.19227	Aminoacyl-tRNA synthetase, class I	87334	-0.879568	Cytochrome c heme-binding site
22746	2.51121	Aromatic-ring hydroxylase	88877	-1.48866	Aminotransferase, class I and II	87511	-0.766714	Cytochrome c heme-binding site
23052	-3.06858	Aromatic-ring hydroxylase	89909	1.54143	Aminotransferase, class I and II	87334	-0.879568	Cytochrome c, class I
40396	-3.03862	Aromatic-ring hydroxylase	95099	1.07942	Aminotransferase, class I and II	87511	-0.766714	Cytochrome c, class I
90902	-2.41522	Aromatic-ring hydroxylase	88877	-1.48866	Aminotransferase, class-II	87334	-0.879568	Cytochrome c, class IA/ IB
94887	-3.44721	Aromatic-ring hydroxylase	92689	-3.28794	AMP-dependent synthetase and ligase	87511	-0.766714	Cytochrome c, class IA/ IB
95663	3.35002	Aromatic-ring hydroxylase	95457	1.42343	AMP-dependent synthetase and ligase	20385	0.733218	Cytochrome P450
94366	1.12247	Arrestin, N-terminal	98495	-1.2295	Animal haem peroxidase	31249	0.955301	Cytochrome P450
25223	-2.29735	ATP/GTP-binding site motif A (P-loop)	22746	2.52843	Ankyrin	31721	0.997875	Cytochrome P450
88480	1.85042	ATP/GTP-binding site motif A (P-loop)	40396	-2.9412	Ankyrin	92219	0.708263	Cytochrome P450
93865	-1.62981	ATP/GTP-binding site motif A (P-loop)	87743	2.65575	Ankyrin	94251	0.831802	Cytochrome P450
88718	1.22583	ATPase, E1-E2 type	89619	-3.0161	Ankyrin	98329	0.69064	Cytochrome P450
39207	-1.30679	ATP-dependent DNA helicase RecQ	92699	1.51987	Ankyrin	106649	0.66744	DH
33905	-1.43122	ATP-dependent DNA ligase	95532	-2.97607	Ankyrin	98518	1.47002	D-isomer specific 2-hydroxyacid dehydrogenase, catalytic region
39207	-1.30679	ATP-dependent helicase, DEAH-box	22746	2.52843	Aromatic-ring hydroxylase	88715	-2.39024	D-isomer specific 2-hydroxyacid dehydrogenase, NAD-binding
95637	-1.72445	Bacterial extracellular solute-binding protein, family 3	23052	-2.78603	Aromatic-ring hydroxylase	98518	1.47002	D-isomer specific 2-hydroxyacid dehydrogenase, NAD-binding
93900	2.38507	Bacterial regulatory protein, LuxR	40396	-2.9412	Aromatic-ring hydroxylase	27666	-0.658712	Dual specificity protein phosphatase
91079	2.24651	Beta-Ig-H3/fasciclin	94887	-2.93414	Aromatic-ring hydroxylase	39459	-1.36135	D-xylulose 5-phosphate/D-fructose 6-phosphate phosphoketolase
38576	1.88633	BolA-like protein	95663	3.25417	Aromatic-ring hydroxylase	105831	0.670953	Dyp-type peroxidase
91382	-1.2497	BRCT	25223	-2.20118	ATP/GTP-binding site motif A (P-loop)	20385	0.733218	E-class P450, group I
90475	2.78244	BTB/POZ	87616	1.1469	ATP/GTP-binding site motif A (P-loop)	31249	0.955301	E-class P450, group I
90917	-1.55057	BTB/POZ	88480	1.23352	ATP/GTP-binding site motif A (P-loop)	31721	0.997875	E-class P450, group I
91269	-1.72612	BTB/POZ	93865	-1.34125	ATP/GTP-binding site motif A (P-loop)	92219	0.708263	E-class P450, group I
24260	1.36608	C2	100085	-1.90483	ATP/GTP-binding site motif A (P-loop)	94251	0.831802	E-class P450, group I
88718	1.22583	Calcium-transporting P-type ATPase, PMR1-type	88718	1.3501	ATPase, E1-E2 type	98329	0.69064	E-class P450, group I
88514	3.94428	Caleosin related	92914	1.10964	ATPase, E1-E2 type	105419	1.3246	E-class P450, group I
91766	-1.15377	Carbohydrate kinase, FGGY	96791	1.41872	Auxin Efflux Carrier	97926	0.792525	EGF-like
95335	-3.2635	Carbohydrate kinase, FGGY	95637	-1.68898	Bacterial extracellular solute-binding protein, family 3	31820	0.694635	Endonuclease/exonuclease/phosphatase
53332	3.62799	Carbohydrate-binding domain, family V/XII	93900	2.5573	Bacterial regulatory protein, LuxR	88581	0.72478	Enoyl-CoA hydratase/isomerase
58726	1.62512	Carbohydrate-binding domain, family V/XII	91079	2.3824	Beta-Ig-H3/fasciclin	20448	0.686342	Esterase/lipase/thioesterase
20448	2.57287	Carboxylesterase, type B	98749	2.45212	Beta-Ig-H3/fasciclin	25380	1.05783	Esterase/lipase/thioesterase
39759	2.51041	Carboxylesterase, type B	89354	-1.18276	Beta-lactamase-like	29945	0.747849	Esterase/lipase/thioesterase
46479	1.78835	Carboxylesterase, type B	90475	2.93144	BTB/POZ	35158	0.819122	Esterase/lipase/thioesterase
49669	-3.49611	Carboxylesterase, type B	90917	-1.25145	BTB/POZ	64334	0.611319	Esterase/lipase/thioesterase
50078	3.00106	Carboxylesterase, type B	97688	-1.93208	BTB/POZ	116549	0.91817	Esterase/lipase/thioesterase
64586	2.48986	Carboxylesterase, type B	98028	-1.1964	BTB/POZ	107568	-1.40666	Eukaryotic translation initiation factor SUI1
91963	2.53152	Carboxylesterase, type B	99112	1.60124	BTB/POZ	112560	-1.35802	Eukaryotic translation initiation factor SUI1
92024	3.85908	Carboxylesterase, type B	99391	-1.39836	BTB/POZ	31820	0.694635	Exodeoxyribonuclease III xth
92489	2.02789	Carboxylesterase, type B	99113	1.15769	Calcium-binding EF-hand	20586	-1.24021	FAD-dependent pyridine nucleotide-disulphide oxidoreductase
93975	3.38111	Carboxylesterase, type B	88718	1.3501	Calcium-transporting P-type ATPase, PMR1-type	89393	0.962585	FAD-dependent pyridine nucleotide-disulphide oxidoreductase
93978	1.85672	Carboxylesterase, type B	95335	-3.39235	Carbohydrate kinase, FGGY	104195	-1.87955	FAD-dependent pyridine nucleotide-disulphide oxidoreductase
34850	1.84478	Catechol dioxygenase, N-terminal	53332	3.88561	Carbohydrate-binding domain, family V/XII	106657	0.848575	Fatty acid desaturase
87645	1.73316	Catechol dioxygenase, N-terminal	58726	1.87207	Carbohydrate-binding domain, family V/XII	106657	0.848575	Fatty acid desaturase, type 1
88718	1.22583	Cation transporting ATPase, C-terminal	20448	3.25922	Carboxylesterase, type B	130030	3.30603	Ferric reductase-like transmembrane component
88718	1.22583	Cation transporting ATPase, N-terminal	39759	2.60465	Carboxylesterase, type B	130043	2.68634	Ferric reductase-like transmembrane component
90769	-1.17029	CDP-alcohol phosphatidyltransferase	46479	1.91638	Carboxylesterase, type B	100149	0.677559	Filamentation induced by cAMP protein Fic
58726	1.62512	Chitinase II	49669	-3.22699	Carboxylesterase, type B	90902	1.68058	Flavoprotein monooxygenase
25391	-1.68935	Chloroperoxidase	50078	3.50519	Carboxylesterase, type B	98224	-0.696615	Flavoprotein monooxygenase
42433	-1.48458	Cyclin	64586	2.56727	Carboxylesterase, type B	101011	1.98612	Flavoprotein monooxygenase
42433	-1.48458	Cyclin, C-terminal	91963	3.00357	Carboxylesterase, type B	24756	0.89719	FMN/related compound-binding core
42433	-1.48458	Cyclin, N-terminal	92024	4.08621	Carboxylesterase, type B	94923	-0.746406	Formate/nitrite transporter
92811	-2.28898	Cyclin-like F-box	92489	1.6866	Carboxylesterase, type B	48495	0.812589	Fungal pheromone STE3 GPCR
94722	1.35108	Cyclin-like F-box	93975	3.72234	Carboxylesterase, type B	48515	0.718952	Fungal pheromone STE3 GPCR
95150	1.59398	Cyclin-like F-box	93978	2.56746	Carboxylesterase, type B	52004	0.615092	Fungal pheromone STE3 GPCR
52869	2.36764	Cytochrome b/b6, N-terminal	99098	2.00863	Catalase	94657	0.75205	Fungal pheromone STE3 GPCR
38091	1.37241	Cytochrome b5	99098	2.00863	Catalase-related	97173	0.801892	Fungal pheromone STE3 GPCR
42874	1.94912	Cytochrome b5	34850	2.14398	Catechol dioxygenase, N-terminal	110701	0.795168	Fungal pheromone STE3 GPCR
94849	-1.42988	Cytochrome b5	87645	1.96738	Catechol dioxygenase, N-terminal	96777	-0.712971	Fungal specific transcription factor
92511	1.92742	Cytochrome c heme-binding site	88718	1.3501	Cation transporting ATPase, C-terminal	105330	-1.26143	Fungal specific transcription factor
38552	-1.32852	Cytochrome oxidase c, subunit VIb	88718	1.3501	Cation transporting ATPase, N-terminal	89815	-0.684161	Gamma tubulin
20385	-3.67957	Cytochrome P450	90769	-1.22731	CDP-alcohol phosphatidyltransferase	32671	0.783788	Generic methyltransferase
21309	-1.79167	Cytochrome P450	58726	1.87207	Chitinase II	89800	-1.16987	Generic methyltransferase
21733	-2.98962	Cytochrome P450	25391	-2.08527	Chloroperoxidase	96962	0.91809	Generic methyltransferase
22059	-2.60902	Cytochrome P450	98960	-2.06925	Citrate synthase	24749	-0.842834	Glucose/ribitol dehydrogenase
31249	-2.9411	Cytochrome P450	92811	-2.04935	Cyclin-like F-box	88136	-1.54863	Glucose/ribitol dehydrogenase
89096	-1.73179	Cytochrome P450	92917	1.74537	Cyclin-like F-box	90606	1.01846	Glucose/ribitol dehydrogenase
89499	-3.79254	Cytochrome P450	94722	1.24982	Cyclin-like F-box	95635	-2.30407	Glucose/ribitol dehydrogenase
89741	-2.08719	Cytochrome P450	95150	1.81407	Cyclin-like F-box	98054	-0.631439	Glucose/ribitol dehydrogenase
93049	1.53207	Cytochrome P450	99915	2.08323	Cyclin-like F-box	103654	-1.73634	Glucose/ribitol dehydrogenase
94251	-1.90909	Cytochrome P450	100199	1.33521	Cyclin-like F-box	104982	0.773566	Glucose/ribitol dehydrogenase
95454	-2.46724	Cytochrome P450	96642	1.26093	Cyclopropane-fatty-acyl-phospholipid synthase	54008	0.898154	Glucose-methanol-choline oxidoreductase
39207	-1.30679	DEAD/DEAH box helicase	99234	-1.73874	Cyclopropane-fatty-acyl-phospholipid synthase	94038	0.858425	Glucose-methanol-choline oxidoreductase
39207	-1.30679	DEAD/DEAH box helicase, N-terminal	52869	2.85657	Cytochrome b/b6, N-terminal	97955	0.873558	Glutamine amidotransferase, class-II
41760	-3.72443	Dienelactone hydrolase	94849	-1.56437	Cytochrome b5	93639	1.24722	Glutathione S-transferase, C-terminal
88204	2.40533	Dienelactone hydrolase	27005	1.27302	Cytochrome c heme-binding site	93639	1.24722	Glutathione S-transferase, N-terminal
88070	2.67922	D-isomer specific 2-hydroxyacid dehydrogenase, catalytic region	87334	-1.47426	Cytochrome c heme-binding site	52805	3.01832	Glycoside hydrolase, family 12
88070	2.67922	D-isomer specific 2-hydroxyacid dehydrogenase, NAD-binding	87511	-1.59499	Cytochrome c heme-binding site	110441	-0.747671	Glycoside hydrolase, family 13, N-terminal
88715	3.55431	D-isomer specific 2-hydroxyacid dehydrogenase, NAD-binding	91476	-1.92524	Cytochrome c heme-binding site	92219	0.708263	Glycoside hydrolase, family 16, active site
89504	5.02625	D-isomer specific 2-hydroxyacid dehydrogenase, NAD-binding	92511	2.12492	Cytochrome c heme-binding site	43189	3.21435	Glycoside hydrolase, family 28
23766	-1.44899	DNA polymerase B, exonuclease	94356	-1.13671	Cytochrome c heme-binding site	43190	2.09545	Glycoside hydrolase, family 28
29770	-1.54033	DNA repair protein (XPGC)/yeast Rad	87334	-1.47426	Cytochrome c, class I	45730	1.10226	Glycoside hydrolase, family 28
89266	-2.56847	DNA-binding, yeast	87511	-1.59499	Cytochrome c, class I	58192	1.51606	Glycoside hydrolase, family 28
23766	-1.44899	DNA-directed DNA polymerase B	87334	-1.47426	Cytochrome c, class IA/ IB	104059	0.864706	Glycoside hydrolase, family 28
27666	1.89054	Dual specificity protein phosphatase	87511	-1.59499	Cytochrome c, class IA/ IB	105711	1.52967	Glycoside hydrolase, family 28
39459	2.02298	D-xylulose 5-phosphate/D-fructose 6-phosphate phosphoketolase	38552	-1.26339	Cytochrome oxidase c, subunit VIb	46915	0.761996	Glycoside hydrolase, family 3, C-terminal
88718	1.22583	E1-E2 ATPase-associated region	20385	-2.94635	Cytochrome P450	95677	0.65958	Glycoside hydrolase, family 3, C-terminal
20385	-3.67957	E-class P450, group I	21309	-1.42357	Cytochrome P450	46915	0.761996	Glycoside hydrolase, family 3, N-terminal
21309	-1.79167	E-class P450, group I	21733	-2.51532	Cytochrome P450	95677	0.65958	Glycoside hydrolase, family 3, N-terminal
21733	-2.98962	E-class P450, group I	22059	-2.07173	Cytochrome P450	107258	1.05152	Glycoside hydrolase, family 31
22059	-2.60902	E-class P450, group I	31249	-1.9858	Cytochrome P450	117029	0.950081	Glycoside hydrolase, family 31
31249	-2.9411	E-class P450, group I	87960	-1.4564	Cytochrome P450	35844	-0.793098	Glycoside hydrolase, family 5
89096	-1.73179	E-class P450, group I	88647	2.10004	Cytochrome P450	100086	-0.677217	Glycoside hydrolase, family 5
89499	-3.79254	E-class P450, group I	89096	-1.31608	Cytochrome P450	121713	0.870401	Glycoside hydrolase, family 5
89741	-2.08719	E-class P450, group I	89499	-3.06233	Cytochrome P450	108796	0.683148	Glycoside hydrolase, family 71
94251	-1.90909	E-class P450, group I	89741	-1.77748	Cytochrome P450	27847	1.00136	GMC oxidoreductase
95454	-2.46724	E-class P450, group I	93049	1.63036	Cytochrome P450	54008	0.898154	GMC oxidoreductase
93049	1.53207	E-class P450, group IV	95454	-1.90832	Cytochrome P450	94038	0.858425	GMC oxidoreductase
24214	1.76664	Epoxide hydrolase	97921	-2.82789	Cytochrome P450	94251	0.831802	GMC oxidoreductase
20448	2.57287	Esterase/lipase/thioesterase	98329	-3.27906	Cytochrome P450	29379	0.824542	G-protein beta WD-40 repeat
22072	1.87352	Esterase/lipase/thioesterase	98989	-2.52053	Cytochrome P450	94541	0.688797	G-protein beta WD-40 repeat
24214	1.76664	Esterase/lipase/thioesterase	100029	-1.50824	Cytochrome P450	103123	0.927691	G-protein beta WD-40 repeat
25380	-3.1113	Esterase/lipase/thioesterase	89238	1.44407	DEAD_2	106540	1.70533	G-protein beta WD-40 repeat
32089	2.07642	Esterase/lipase/thioesterase	89238	1.44407	DEXDc2	31820	0.694635	GRF zinc finger
35158	-2.44661	Esterase/lipase/thioesterase	41760	-3.3767	Dienelactone hydrolase	93468	0.660523	GTP-binding
39759	2.51041	Esterase/lipase/thioesterase	88204	2.51082	Dienelactone hydrolase	38391	1.28446	Guanine-specific ribonuclease N1 and T1
40808	1.66119	Esterase/lipase/thioesterase	88070	2.47278	D-isomer specific 2-hydroxyacid dehydrogenase, catalytic region	106649	0.66744	H+-transporting two-sector ATPase, alpha/beta subunit, central region
49669	-3.49611	Esterase/lipase/thioesterase	88070	2.47278	D-isomer specific 2-hydroxyacid dehydrogenase, NAD-binding	105513	-0.79441	Histone H4
50078	3.00106	Esterase/lipase/thioesterase	89504	4.47766	D-isomer specific 2-hydroxyacid dehydrogenase, NAD-binding	97955	0.873558	HMG1/2 (high mobility group) box
64586	2.48986	Esterase/lipase/thioesterase	89266	-2.77859	DNA-binding, yeast	106191	1.48853	Homeobox
87170	2.15918	Esterase/lipase/thioesterase	88718	1.3501	E1-E2 ATPase-associated region	102140	-0.679087	Indoleamine 2,3-dioxygenase
87770	-3.00547	Esterase/lipase/thioesterase	20385	-2.94635	E-class P450, group I	31721	0.997875	Inorganic pyrophosphatase
90069	1.26468	Esterase/lipase/thioesterase	21309	-1.42357	E-class P450, group I	118556	-2.05657	Iron permease FTR1
93975	3.38111	Esterase/lipase/thioesterase	21733	-2.51532	E-class P450, group I	124512	-1.54545	Iron permease FTR1
94972	1.32562	Esterase/lipase/thioesterase	22059	-2.07173	E-class P450, group I	24859	-0.837528	Isocitrate lyase and phosphorylmutase
94973	3.10358	Esterase/lipase/thioesterase	31249	-1.9858	E-class P450, group I	104506	0.731959	Isoflavone reductase
95467	-2.25176	Esterase/lipase/thioesterase	87960	-1.4564	E-class P450, group I	96901	0.757192	Isopenicillin N synthase
95473	-1.1764	Esterase/lipase/thioesterase	89096	-1.31608	E-class P450, group I	26886	2.04087	Isoprenylcysteine carboxyl methyltransferase
87743	2.39346	Eukaryotic molybdopterin oxidoreductase	89499	-3.06233	E-class P450, group I	101652	0.770426	Isoprenylcysteine carboxyl methyltransferase
87716	-1.96902	FAD-binding	89741	-1.77748	E-class P450, group I	102050	1.5969	KH
89393	-1.51527	FAD-dependent pyridine nucleotide-disulphide oxidoreductase	95454	-1.90832	E-class P450, group I	102050	1.5969	KH, type 1
94887	-3.44721	FAD-dependent pyridine nucleotide-disulphide oxidoreductase	98329	-3.27906	E-class P450, group I	90029	0.695553	Kinesin, motor region
21931	-2.10438	Flavin-containing amine oxidase	98989	-2.52053	E-class P450, group I	94534	0.695829	Kinesin, motor region
23306	2.09411	Flavin-containing monooxygenase FMO	100029	-1.50824	E-class P450, group I	94400	0.985031	Leucine-rich repeat
87716	-1.96902	Flavodoxin/nitric oxide synthase	88647	2.10004	E-class P450, group IV	94400	0.985031	Leucine-rich repeat, cysteine-containing type
87716	-1.96902	Flavodoxin-like	93049	1.63036	E-class P450, group IV	94400	0.985031	Leucine-rich repeat, typical subtype
22746	2.51121	Flavoprotein monooxygenase	97926	-1.98059	EGF-like	24119	-0.707589	Lipase, active site
23052	-3.06858	Flavoprotein monooxygenase	99581	1.78084	EGF-like	25380	1.05783	Lipase, active site
40396	-3.03862	Flavoprotein monooxygenase	90662	-1.5848	Elongation factor Ts	33906	-0.783321	Lipase, active site
90902	-2.41522	Flavoprotein monooxygenase	95833	1.17919	Emopamil-binding	35158	0.819122	Lipase, active site
87716	-1.96902	Flavoprotein pyridine nucleotide cytochrome reductase	20448	3.25922	Esterase/lipase/thioesterase	25380	1.05783	Lipase, class 3
24756	-3.39248	FMN/related compound-binding core	22072	1.7758	Esterase/lipase/thioesterase	35158	0.819122	Lipase, class 3
94923	1.51581	Formate/nitrite transporter	25380	-2.05348	Esterase/lipase/thioesterase	64334	0.611319	Lipolytic enzyme
94657	-1.31803	Fungal pheromone STE3 GPCR	29945	1.58509	Esterase/lipase/thioesterase	116549	0.91817	Lipolytic enzyme
91105	1.8404	Fungal specific transcription factor	29949	1.37506	Esterase/lipase/thioesterase	22289	-0.798957	Major facilitator superfamily
91105	1.8404	Fungal transcriptional regulatory protein, N-terminal	32089	1.85645	Esterase/lipase/thioesterase	32664	0.805752	Major facilitator superfamily
92548	2.88879	Fungal transcriptional regulatory protein, N-terminal	35158	-1.62749	Esterase/lipase/thioesterase	35803	1.6533	Major facilitator superfamily
93876	2.1486	Fungal transcriptional regulatory protein, N-terminal	39759	2.60465	Esterase/lipase/thioesterase	106546	0.90865	Major facilitator superfamily
89107	1.7386	Galactose-1-phosphate uridyl transferase	40808	1.35336	Esterase/lipase/thioesterase	94633	-0.742601	Major intrinsic protein
89107	1.7386	Galactose-1-phosphate uridyl transferase, class I	49669	-3.22699	Esterase/lipase/thioesterase	87605	-0.793009	Malic oxidoreductase
89107	1.7386	Galactose-1-phosphate uridyl transferase, C-terminal	50078	3.50519	Esterase/lipase/thioesterase	89079	-0.958454	Malic oxidoreductase
89107	1.7386	Galactose-1-phosphate uridyl transferase, N-terminal	64586	2.56727	Esterase/lipase/thioesterase	40389	-1.04509	Mannose-6-phosphate isomerase, type I
91044	4.5471	General substrate transporter	87170	2.41038	Esterase/lipase/thioesterase	90864	0.768665	MCM
92003	5.09652	General substrate transporter	87770	-2.29944	Esterase/lipase/thioesterase	90864	0.768665	MCM protein 7
89073	2.54862	Generic methyltransferase	93975	3.72234	Esterase/lipase/thioesterase	87012	-1.42986	Methionine synthase, vitamin-B12 independent
89636	-1.78717	Generic methyltransferase	94969	-1.35317	Esterase/lipase/thioesterase	90902	1.68058	Monooxygenase, FAD-binding
89800	1.82323	Generic methyltransferase	94972	1.23076	Esterase/lipase/thioesterase	101011	1.98612	Monooxygenase, FAD-binding
24749	1.47268	Glucose/ribitol dehydrogenase	94973	3.07427	Esterase/lipase/thioesterase	109824	-2.1968	Multicopper oxidase, copper-binding site
25916	-2.8857	Glucose/ribitol dehydrogenase	95467	-2.22642	Esterase/lipase/thioesterase	109824	-2.1968	Multicopper oxidase, type 1
35284	-1.43644	Glucose/ribitol dehydrogenase	87743	2.65575	Eukaryotic molybdopterin oxidoreductase	92695	0.930453	N-6 Adenine-specific DNA methylase
86965	-2.09921	Glucose/ribitol dehydrogenase	97771	-1.46867	Eukaryotic protein of unknown function DUF829	96009	-0.681307	NACHT nucleoside triphosphatase
87849	1.88201	Glucose/ribitol dehydrogenase	87716	-1.86766	FAD-binding	90902	1.68058	NAD-binding site
89996	1.74144	Glucose/ribitol dehydrogenase	94887	-2.93414	FAD-dependent pyridine nucleotide-disulphide oxidoreductase	101011	1.98612	NAD-binding site
93130	2.69484	Glucose/ribitol dehydrogenase	100166	1.17857	Filamentation induced by cAMP protein Fic	93718	1.78963	Nuclear protein G9a
95635	3.63486	Glucose/ribitol dehydrogenase	21931	-2.11882	Flavin-containing amine oxidase	86766	-1.14192	NULL
54008	2.81349	Glucose-methanol-choline oxidoreductase	23306	2.04895	Flavin-containing monooxygenase FMO	87216	-1.04939	NULL
94038	-1.22302	Glucose-methanol-choline oxidoreductase	87716	-1.86766	Flavodoxin/nitric oxide synthase	97215	0.679701	NULL
33280	1.57379	Glutamate-cysteine ligase catalytic subunit	87716	-1.86766	Flavodoxin-like	98268	0.893711	NULL
90548	1.33447	Glutamate-cysteine ligase catalytic subunit	22746	2.52843	Flavoprotein monooxygenase	102236	-0.845068	NULL
86808	-3.61883	Glutathione S-transferase, C-terminal	23052	-2.78603	Flavoprotein monooxygenase	107568	-1.40666	NULL
88909	-2.55229	Glutathione S-transferase, C-terminal	40396	-2.9412	Flavoprotein monooxygenase	112560	-1.35802	NULL
86808	-3.61883	Glutathione S-transferase, N-terminal	87716	-1.86766	Flavoprotein pyridine nucleotide cytochrome reductase	121713	0.870401	NULL
87703	-2.4047	Glutathione S-transferase, N-terminal	24756	-2.49529	FMN/related compound-binding core	32671	0.783788	O-methyltransferase, family 2
88338	1.74527	Glutathione S-transferase, N-terminal	91105	1.60495	Fungal specific transcription factor	96962	0.91809	O-methyltransferase, family 2
88909	-2.55229	Glutathione S-transferase, N-terminal	92559	-1.60252	Fungal specific transcription factor	105020	-0.935954	OsmC-like protein
36549	2.68529	Glutathione-dependent formaldehyde-activating, GFA	96777	1.40097	Fungal specific transcription factor	101370	0.662382	Paired amphipathic helix
52869	2.36764	Glycoside hydrolase family 2, immunoglobulin-like beta-sandwich domain	91105	1.60495	Fungal transcriptional regulatory protein, N-terminal	43189	3.21435	Parallel beta-helix repeat
53332	3.62799	Glycoside hydrolase, chitinase active site	92548	2.35607	Fungal transcriptional regulatory protein, N-terminal	43190	2.09545	Parallel beta-helix repeat
58726	1.62512	Glycoside hydrolase, chitinase active site	93876	2.04201	Fungal transcriptional regulatory protein, N-terminal	54928	1.26028	Pectinesterase
45922	2.30208	Glycoside hydrolase, family 1	89107	2.04389	Galactose-1-phosphate uridyl transferase	54936	1.36755	Pectinesterase
53332	3.62799	Glycoside hydrolase, family 18	89107	2.04389	Galactose-1-phosphate uridyl transferase, class I	56644	1.8206	Pectinesterase
58726	1.62512	Glycoside hydrolase, family 18	89107	2.04389	Galactose-1-phosphate uridyl transferase, C-terminal	106813	-1.12137	Peptidase A1, pepsin
43189	-6.05138	Glycoside hydrolase, family 28	89107	2.04389	Galactose-1-phosphate uridyl transferase, N-terminal	100834	0.69699	Peptidase M, neutral zinc metallopeptidases, zinc-binding site
46915	2.05039	Glycoside hydrolase, family 3, C-terminal	88597	1.46624	Gamma-glutamyltranspeptidase	88581	0.72478	Peptidase S49
95677	2.25295	Glycoside hydrolase, family 3, C-terminal	92020	-1.25254	GCN5-related N-acetyltransferase	43189	3.21435	Peptidase S8 and S53, subtilisin, kexin, sedolisin
46915	2.05039	Glycoside hydrolase, family 3, N-terminal	91044	4.50266	General substrate transporter	86766	-1.14192	Peptidylprolyl isomerase, FKBP-type
51213	2.85886	Glycoside hydrolase, family 3, N-terminal	92003	4.99078	General substrate transporter	87216	-1.04939	Peptidylprolyl isomerase, FKBP-type
95677	2.25295	Glycoside hydrolase, family 3, N-terminal	100245	-2.86519	General substrate transporter	48495	0.812589	Pheromone A receptor
54008	2.81349	GMC oxidoreductase	89073	2.41262	Generic methyltransferase	48515	0.718952	Pheromone A receptor
92024	3.85908	GMC oxidoreductase	89636	-1.3565	Generic methyltransferase	94657	0.75205	Pheromone A receptor
94038	-1.22302	GMC oxidoreductase	25916	-3.49329	Glucose/ribitol dehydrogenase	48495	0.812589	Pheromone B alpha-1 receptor
94251	-1.90909	GMC oxidoreductase	86965	-2.11395	Glucose/ribitol dehydrogenase	52004	0.615092	Pheromone B alpha-1 receptor
23959	2.07029	G-protein beta WD-40 repeat	87849	2.19145	Glucose/ribitol dehydrogenase	97173	0.801892	Pheromone B alpha-1 receptor
94139	-2.07829	G-protein beta WD-40 repeat	89996	2.08662	Glucose/ribitol dehydrogenase	110701	0.795168	Pheromone B alpha-1 receptor
94541	-1.44988	G-protein beta WD-40 repeat	93130	2.16976	Glucose/ribitol dehydrogenase	92760	1.22964	Phosphoglycerate/bisphosphoglycerate mutase
87428	2.1898	GroES-related	96963	-1.83082	Glucose/ribitol dehydrogenase	90712	0.966616	Phospholipid methyltransferase
87967	3.74242	GroES-related	97126	1.9438	Glucose/ribitol dehydrogenase	100964	0.676195	Phosphopantetheine attachment site
89734	4.44389	GroES-related	97708	2.72104	Glucose/ribitol dehydrogenase	101737	0.675356	Phosphopantetheine attachment site
92433	-4.15793	Guanine nucleotide binding protein (G-protein), alpha subunit	98054	2.74978	Glucose/ribitol dehydrogenase	20308	1.0197	Protein kinase
38391	-3.06869	Guanine-specific ribonuclease N1 and T1	99281	-1.44208	Glucose/ribitol dehydrogenase	41744	-0.655721	Protein kinase
95282	1.33811	HAD-superfamily subfamily IB hydrolase, hypothetical 1	54008	3.71164	Glucose-methanol-choline oxidoreductase	42043	-1.20578	Protein kinase
90946	4.68893	Haem peroxidase, plant/fungal/bacterial	61665	1.44833	Glucose-methanol-choline oxidoreductase	89016	-0.807129	Protein kinase
88718	1.22583	Haloacid dehalogenase-like hydrolase	33280	1.53994	Glutamate-cysteine ligase catalytic subunit	93468	0.660523	Protein kinase
36507	1.18758	Heat shock protein DnaJ, N-terminal	90548	1.38713	Glutamate-cysteine ligase catalytic subunit	94560	0.742778	Protein kinase
95893	1.41488	Heat shock protein DnaJ, N-terminal	86808	-3.9844	Glutathione S-transferase, C-terminal	97527	0.607828	Protein kinase
95020	-3.55714	Heat shock protein Hsp20	88909	-1.97679	Glutathione S-transferase, C-terminal	98728	1.4186	Protein kinase
39207	-1.30679	Helicase, C-terminal	97355	1.92547	Glutathione S-transferase, C-terminal	102050	1.5969	Protein kinase
92142	2.85542	Hexokinase	86808	-3.9844	Glutathione S-transferase, N-terminal	97843	-1.63554	Protein of unknown function DUF1264
89619	-2.88544	Histidine acid phosphatase	87703	-2.76868	Glutathione S-transferase, N-terminal	32132	-0.625358	Protein of unknown function RIO1
95532	-2.7677	Histidine acid phosphatase	88338	1.51222	Glutathione S-transferase, N-terminal	89616	-0.724006	Protein of unknown function UPF0113
27048	2.2339	HpcH/HpaI aldolase	88909	-1.97679	Glutathione S-transferase, N-terminal	89616	-0.724006	PUA
27049	2.19603	HpcH/HpaI aldolase	97355	1.92547	Glutathione S-transferase, N-terminal	20586	-1.24021	Pyridine nucleotide-disulphide oxidoreductase, class I
45959	1.54555	Hpt	36549	2.46255	Glutathione-dependent formaldehyde-activating, GFA	89393	0.962585	Pyridine nucleotide-disulphide oxidoreductase, class I
87610	2.55838	Hydroxyacid dehydrogenase/reductase	52869	2.85657	Glycoside hydrolase family 2, immunoglobulin-like beta-sandwich domain	89393	0.962585	Pyridine nucleotide-disulphide oxidoreductase, class-II
89170	2.48839	Hydroxyacid dehydrogenase/reductase	53332	3.88561	Glycoside hydrolase, chitinase active site	102050	1.5969	Replication factor C conserved region
37165	1.53646	Hypoxia induced protein conserved region	58726	1.87207	Glycoside hydrolase, chitinase active site	94633	-0.742601	Rhodopsin-like GPCR superfamily
93130	2.69484	Immunoglobulin/major histocompatibility complex	98662	2.98438	Glycoside hydrolase, clan GH-D	94259	-0.803811	RhoGAP
95180	2.21249	Inorganic pyrophosphatase	45922	2.61754	Glycoside hydrolase, family 1	26795	-0.861687	Ribonuclease III
34850	1.84478	Intradiol ring-cleavage dioxygenase	99113	1.15769	Glycoside hydrolase, family 11	62506	0.63537	Ribosomal protein L30e
87645	1.73316	Intradiol ring-cleavage dioxygenase	52805	2.38268	Glycoside hydrolase, family 12	62506	0.63537	Ribosomal protein L7Ae/L30e/S12e/Gadd45
41141	2.75946	Isoflavone reductase	53332	3.88561	Glycoside hydrolase, family 18	112627	0.644455	Ribosomal protein S11
34407	1.98236	Isopenicillin N synthase	58726	1.87207	Glycoside hydrolase, family 18	94251	0.831802	Ribosomal protein S14
92811	-2.28898	Isoprenylcysteine carboxyl methyltransferase	43189	-2.83703	Glycoside hydrolase, family 28	121649	0.631533	Ribosomal protein S14
87727	3.29158	KCNAB voltage-gated K+ channel, beta subunit	46915	2.81239	Glycoside hydrolase, family 3, C-terminal	96308	-0.974419	Ribosomal RNA methyltransferase RrmJ/FtsJ
25862	1.1427	Ketopantoate hydroxymethyltransferase	95677	2.91253	Glycoside hydrolase, family 3, C-terminal	96965	1.87264	Ricin B lectin
90029	-1.54957	Kinesin, motor region	46915	2.81239	Glycoside hydrolase, family 3, N-terminal	96982	1.11816	Ricin B lectin
94534	-1.53427	Kinesin, motor region	51213	3.30973	Glycoside hydrolase, family 3, N-terminal	90903	0.871506	RNA-binding region RNP-1 (RNA recognition motif)
96240	-1.43495	Kinesin, motor region	95677	2.91253	Glycoside hydrolase, family 3, N-terminal	96021	0.811044	RNA-binding region RNP-1 (RNA recognition motif)
91766	-1.15377	Leucine-rich repeat	54008	3.71164	GMC oxidoreductase	101012	0.952966	RNA-binding region RNP-1 (RNA recognition motif)
25380	-3.1113	Lipase, active site	61665	1.44833	GMC oxidoreductase	105236	1.1805	RNA-binding region RNP-1 (RNA recognition motif)
33906	1.6312	Lipase, active site	92024	4.08621	GMC oxidoreductase	92993	-1.08357	RTA1 like protein
35158	-2.44661	Lipase, active site	99813	3.78036	GPR1/FUN34/yaaH	32671	0.783788	SAM (and some other nucleotide) binding motif
94494	1.93354	Lipase, active site	23959	1.90808	G-protein beta WD-40 repeat	89800	-1.16987	SAM (and some other nucleotide) binding motif
25380	-3.1113	Lipase, class 3	94139	-1.68449	G-protein beta WD-40 repeat	96962	0.91809	SAM (and some other nucleotide) binding motif
35158	-2.44661	Lipase, class 3	97619	1.25218	G-protein beta WD-40 repeat	98926	-0.628437	Serine/threonine dehydratase, pyridoxal-phosphate-binding site
90475	2.78244	Lipocalin-related protein and Bos/Can/Equ allergen	87428	2.05718	GroES-related	20308	1.0197	Serine/threonine protein kinase
95467	-2.25176	Lipolytic enzyme	87967	3.84908	GroES-related	41744	-0.655721	Serine/threonine protein kinase
95473	-1.1764	Lipolytic enzyme	89734	4.51257	GroES-related	89016	-0.807129	Serine/threonine protein kinase
95691	2.82992	Lipolytic enzyme, G-D-S-L	92433	-3.37698	Guanine nucleotide binding protein (G-protein), alpha subunit	93468	0.660523	Serine/threonine protein kinase
95691	2.82992	Lipolytic enzyme, G-D-S-L, active site	38391	-1.78423	Guanine-specific ribonuclease N1 and T1	97527	0.607828	Serine/threonine protein kinase
91547	2.97307	L-lactate/malate dehydrogenase	90946	4.74489	Haem peroxidase, plant/fungal/bacterial	98728	1.4186	Serine/threonine protein kinase
88655	3.98503	Macrophage migration inhibitory factor	88718	1.3501	Haloacid dehalogenase-like hydrolase	102050	1.5969	Serine/threonine protein kinase
23587	-3.18902	Major facilitator superfamily	96258	-1.05576	Heat shock factor (HSF)-type, DNA-binding	20308	1.0197	Serine/threonine protein kinase, active site
31598	1.72793	Major facilitator superfamily	95020	-2.84013	Heat shock protein Hsp20	41744	-0.655721	Serine/threonine protein kinase, active site
32664	-2.55845	Major facilitator superfamily	89238	1.44407	Helicase c2	89016	-0.807129	Serine/threonine protein kinase, active site
39403	1.44834	Major facilitator superfamily	92142	2.30512	Hexokinase	97527	0.607828	Serine/threonine protein kinase, active site
91044	4.5471	Major facilitator superfamily	89619	-3.0161	Histidine acid phosphatase	102050	1.5969	Serine/threonine protein kinase, active site
92003	5.09652	Major facilitator superfamily	92461	-1.42733	Histidine acid phosphatase	24749	-0.842834	Short-chain dehydrogenase/reductase SDR
93412	4.51711	Major facilitator superfamily	95532	-2.97607	Histidine acid phosphatase	88136	-1.54863	Short-chain dehydrogenase/reductase SDR
88529	2.29609	Mandelate racemase/muconate lactonizing enzyme	99774	-1.65804	Homeobox	90606	1.01846	Short-chain dehydrogenase/reductase SDR
90226	2.45534	Mandelate racemase/muconate lactonizing enzyme	27048	2.806	HpcH/HpaI aldolase	95635	-2.30407	Short-chain dehydrogenase/reductase SDR
90703	1.45676	Manganese and iron superoxide dismutase	27049	2.53742	HpcH/HpaI aldolase	98054	-0.631439	Short-chain dehydrogenase/reductase SDR
88616	1.36341	MAP kinase	45959	1.24412	Hpt	103654	-1.73634	Short-chain dehydrogenase/reductase SDR
90864	-2.11359	MCM	96258	-1.05576	HSF/ETS, DNA-binding	104982	0.773566	Short-chain dehydrogenase/reductase SDR
90864	-2.11359	MCM protein 7	90356	1.12075	Hydantoinase B/oxoprolinase	95211	0.937542	Smr protein/MutS2 C-terminal
24004	1.31219	Metallophosphoesterase	87610	2.48345	Hydroxyacid dehydrogenase/reductase	87744	-0.644109	SPX, N-terminal
87012	1.55637	Methionine synthase, vitamin-B12 independent	89170	2.35719	Hydroxyacid dehydrogenase/reductase	22289	-0.798957	Sugar transporter superfamily
87815	-1.72735	Methionine synthase, vitamin-B12 independent	37165	1.51764	Hypoxia induced protein conserved region	102050	1.5969	Sugar transporter superfamily
88639	2.06271	Methionine synthase, vitamin-B12 independent	93130	2.16976	Immunoglobulin/major histocompatibility complex	103584	0.968227	Sugar transporter superfamily
88965	-1.64428	Mitochondrial substrate carrier	99924	-1.28009	Immunoglobulin/major histocompatibility complex	93052	-0.887121	Survival protein SurE
89742	-1.42773	Mitochondrial substrate carrier	95180	2.2162	Inorganic pyrophosphatase	105496	0.794692	Terpene synthase, metal-binding
92024	3.85908	Mitochondrial substrate carrier	34850	2.14398	Intradiol ring-cleavage dioxygenase	99098	-1.82775	ThiJ/PfpI
87743	2.39346	Mo-co oxidoreductase dimerisation domain	87645	1.96738	Intradiol ring-cleavage dioxygenase	91327	-0.870136	TonB box, N-terminal
90902	-2.41522	Monooxygenase, FAD-binding	41141	2.50035	Isoflavone reductase	109824	-2.1968	TonB box, N-terminal
87416	-1.83793	Mpv17/PMP22	96901	2.45406	Isopenicillin N synthase	107568	-1.40666	Translation initiation factor SUI1
34346	-1.53145	Na+ dependent nucleoside transporter	92811	-2.04935	Isoprenylcysteine carboxyl methyltransferase	112560	-1.35802	Translation initiation factor SUI1
90902	-2.41522	NAD-binding site	87727	3.65471	KCNAB voltage-gated K+ channel, beta subunit	100429	1.59209	tRNA-binding arm
88185	-3.46321	NADH:flavin oxidoreductase/NADH oxidase	22572	-1.23021	Kelch	95088	-0.750545	Tropomyosin
89748	-4.72723	NADH:flavin oxidoreductase/NADH oxidase	22572	-1.23021	Kelch repeat	89815	-0.684161	Tubulin
90180	2.61278	NADH:flavin oxidoreductase/NADH oxidase	25862	1.17513	Ketopantoate hydroxymethyltransferase	89815	-0.684161	Tubulin/FtsZ, C-terminal
90658	1.33903	NADH:flavin oxidoreductase/NADH oxidase	94267	1.27107	Late embryogenesis abundant protein	89815	-0.684161	Tubulin/FtsZ, GTPase
52765	-3.08644	Natural resistance-associated macrophage protein	25380	-2.05348	Lipase, active site	20308	1.0197	Tyrosine protein kinase
93718	-3.7195	Nuclear protein G9a	35158	-1.62749	Lipase, active site	41744	-0.655721	Tyrosine protein kinase
51213	2.85886	NULL	94494	1.7677	Lipase, active site	89016	-0.807129	Tyrosine protein kinase
86766	3.67185	NULL	25380	-2.05348	Lipase, class 3	97527	0.607828	Tyrosine protein kinase
87216	3.47715	NULL	35158	-1.62749	Lipase, class 3	102050	1.5969	Tyrosine protein kinase
88965	-1.64428	NULL	90475	2.93144	Lipocalin-related protein and Bos/Can/Equ allergen	42043	-1.20578	Tyrosine protein kinase, active site
89742	-1.42773	NULL	95467	-2.22642	Lipolytic enzyme	94560	0.742778	Tyrosine protein kinase, active site
92024	3.85908	NULL	95691	2.78322	Lipolytic enzyme, G-D-S-L	101854	0.991774	Tyrosine protein kinase, active site
92193	-1.59501	NULL	95691	2.78322	Lipolytic enzyme, G-D-S-L, active site	27666	-0.658712	Tyrosine specific protein phosphatase and dual specificity
92489	2.02789	NULL	91547	2.7252	L-lactate/malate dehydrogenase	105387	-2.11866	UbiA prenyltransferase
93049	1.53207	NULL	88655	3.40869	Macrophage migration inhibitory factor	89800	-1.16987	UbiE/COQ5 methyltransferase
94507	-1.31023	NULL	22289	-2.39476	Major facilitator superfamily	42544	-2.16614	Ubiquitin-conjugating enzymes
96268	-2.62864	NULL	23587	-2.73143	Major facilitator superfamily	88715	-2.39024	Zinc-containing alcohol dehydrogenase
90757	1.27843	Oligopeptide transporter OPT superfamily	31598	1.55096	Major facilitator superfamily	88101	0.674635	Zinc-containing alcohol dehydrogenase superfamily
89073	2.54862	O-methyltransferase, family 2	32664	-1.7527	Major facilitator superfamily	88715	-2.39024	Zinc-containing alcohol dehydrogenase superfamily
87716	-1.96902	Oxidoreductase FAD/NAD(P)-binding	35803	2.37627	Major facilitator superfamily	98615	0.774214	Zinc-containing alcohol dehydrogenase superfamily
87743	2.39346	Oxidoreductase, molybdopterin binding	39403	1.27282	Major facilitator superfamily	103090	0.69922	Zinc-containing alcohol dehydrogenase superfamily
88616	1.36341	p38 MAP kinase	91044	4.50266	Major facilitator superfamily	105939	0.814102	Zinc-containing alcohol dehydrogenase superfamily
43189	-6.05138	Parallel beta-helix repeat	92003	4.99078	Major facilitator superfamily	93658	0.718765	Zn-finger, C2H2 type
31958	1.82065	Peptidase M, neutral zinc metallopeptidases, zinc-binding site	93412	4.10493	Major facilitator superfamily	94570	1.73459	Zn-finger, C2H2 type
31968	1.29073	Peptidase M, neutral zinc metallopeptidases, zinc-binding site	99513	1.2759	Major facilitator superfamily	97721	-1.74685	Zn-finger, C2H2 type
87170	2.15918	Peptidase M, neutral zinc metallopeptidases, zinc-binding site	100245	-2.86519	Major facilitator superfamily	100149	0.677559	Zn-finger, C2H2 type
92324	-2.17664	Peptidase M14, carboxypeptidase A	88529	2.6138	Mandelate racemase/muconate lactonizing enzyme	103584	0.968227	Zn-finger, C2H2 type
30883	1.26086	Peptidase M20	90226	2.94688	Mandelate racemase/muconate lactonizing enzyme	105875	0.627986	Zn-finger, C2H2 type
88973	1.59044	Peptidase M28	90703	1.41432	Manganese and iron superoxide dismutase	103123	0.927691	Zn-finger, C-x8-C-x5-C-x3-H type
87770	-3.00547	Peptidase S33, prolyl aminopeptidase	90864	-1.34493	MCM	91327	-0.870136	Zn-finger, MYND type
87770	-3.00547	Peptidase S33, tricorn interacting factor 1	90864	-1.34493	MCM protein 7	91707	1.01601	Zn-finger, MYND type
43189	-6.05138	Peptidase S8 and S53, subtilisin, kexin, sedolisin	95035	1.18173	Metal-dependent phosphohydrolase, HD subdomain	98428	-1.70601	Zn-finger, MYND type
89244	-1.56783	Peptidase S8 and S53, subtilisin, kexin, sedolisin	87815	-1.8528	Methionine synthase, vitamin-B12 independent	101646	1.089	Zn-finger, MYND type
86766	3.67185	Peptidylprolyl isomerase, FKBP-type	88639	2.164	Methionine synthase, vitamin-B12 independent	102823	-1.51166	Zn-finger, MYND type
87216	3.47715	Peptidylprolyl isomerase, FKBP-type	88965	-1.60668	Mitochondrial substrate carrier	91677	-0.786944	Zn-finger, Ran-binding
86954	-1.99107	Peptidyl-tRNA hydrolase	89742	-1.8387	Mitochondrial substrate carrier
22165	1.31403	Permease for cytosine/purines, uracil, thiamine, allantoin	92024	4.08621	Mitochondrial substrate carrier
40171	-2.89636	Permease for cytosine/purines, uracil, thiamine, allantoin	98749	2.45212	Mitochondrial substrate carrier
94657	-1.31803	Pheromone A receptor	87743	2.65575	Mo-co oxidoreductase dimerisation domain
94244	1.11053	Phosphatidylserine decarboxylase-related	98661	2.92917	Molybdenum cofactor biosynthesis protein
90712	-4.59705	Phospholipid methyltransferase	87416	-1.37043	Mpv17/PMP22
92689	-3.79893	Phosphopantetheine-binding	34346	-1.69259	Na+ dependent nucleoside transporter
46523	2.35447	Polysaccharide deacetylase	88185	-3.3533	NADH:flavin oxidoreductase/NADH oxidase
46526	2.1434	Polysaccharide deacetylase	89748	-4.50639	NADH:flavin oxidoreductase/NADH oxidase
47053	3.41093	Polysaccharide deacetylase	90180	2.5543	NADH:flavin oxidoreductase/NADH oxidase
93226	2.35297	Polysaccharide deacetylase	97401	-1.16625	Nascent polypeptide-associated complex NAC
20308	-2.18458	Protein kinase	52765	-2.53389	Natural resistance-associated macrophage protein
23483	1.24017	Protein kinase	93718	-1.92987	Nuclear protein G9a
26829	-2.37279	Protein kinase	51213	3.30973	NULL
27981	1.92732	Protein kinase	86766	2.52992	NULL
41744	1.47837	Protein kinase	87216	2.42776	NULL
42043	2.27779	Protein kinase	88965	-1.60668	NULL
88616	1.36341	Protein kinase	89742	-1.8387	NULL
89742	-1.42773	Protein kinase	92024	4.08621	NULL
95939	-1.58469	Protein kinase	92489	1.6866	NULL
36449	1.53734	Protein of unknown function DUF59	93049	1.63036	NULL
94494	1.93354	Protein of unknown function DUF726	97688	-1.93208	NULL
38143	1.83691	Protein of unknown function DUF77	98028	-1.1964	NULL
32132	1.2536	Protein of unknown function RIO1	98749	2.45212	NULL
96500	1.77165	Protein of unknown function UPF0031	90757	1.48177	Oligopeptide transporter OPT superfamily
87606	2.13672	Protein tyrosine phosphatase, catalytic region	89073	2.41262	O-methyltransferase, family 2
89393	-1.51527	Pyridine nucleotide-disulphide oxidoreductase, class I	87716	-1.86766	Oxidoreductase FAD/NAD(P)-binding
89393	-1.51527	Pyridine nucleotide-disulphide oxidoreductase, class-II	87743	2.65575	Oxidoreductase, molybdopterin binding
94887	-3.44721	Pyridine nucleotide-disulphide oxidoreductase, class-II	43189	-2.83703	Parallel beta-helix repeat
88167	1.72531	Pyridoxal-5'-phosphate-dependent enzyme, beta subunit	54928	2.74284	Pectinesterase
20333	-3.2718	Pyruvate decarboxylase	54936	2.02521	Pectinesterase
92689	-3.79893	Ribonuclease II	56644	1.46508	Pectinesterase
87004	-1.81851	Ribosomal L28e protein	31958	1.45441	Peptidase M, neutral zinc metallopeptidases, zinc-binding site
86865	-1.6073	Ribosomal L38e protein	87170	2.41038	Peptidase M, neutral zinc metallopeptidases, zinc-binding site
62506	-1.97552	Ribosomal protein L30e	92324	-1.97783	Peptidase M14, carboxypeptidase A
36658	-1.4054	Ribosomal protein L6	30883	1.33705	Peptidase M20
62506	-1.97552	Ribosomal protein L7Ae/L30e/S12e/Gadd45	88973	1.58065	Peptidase M28
94251	-1.90909	Ribosomal protein S14	87770	-2.29944	Peptidase S33, prolyl aminopeptidase
87168	-1.47918	Ribosomal protein S8	87770	-2.29944	Peptidase S33, tricorn interacting factor 1
93800	#NAME?	Ricin B lectin	43189	-2.83703	Peptidase S8 and S53, subtilisin, kexin, sedolisin
87168	-1.47918	RNA-binding region RNP-1 (RNA recognition motif)	89244	-1.30925	Peptidase S8 and S53, subtilisin, kexin, sedolisin
90903	-1.84611	RNA-binding region RNP-1 (RNA recognition motif)	86766	2.52992	Peptidylprolyl isomerase, FKBP-type
96021	-1.66974	RNA-binding region RNP-1 (RNA recognition motif)	87216	2.42776	Peptidylprolyl isomerase, FKBP-type
89397	1.20348	SAICAR synthetase	86954	-1.77496	Peptidyl-tRNA hydrolase
35364	-1.63288	SAM (and some other nucleotide) binding motif	40171	-2.44146	Permease for cytosine/purines, uracil, thiamine, allantoin
89073	2.54862	SAM (and some other nucleotide) binding motif	96734	1.74214	Phosphoglucose isomerase (PGI)
89636	-1.78717	SAM (and some other nucleotide) binding motif	90712	-3.63043	Phospholipid methyltransferase
89800	1.82323	SAM (and some other nucleotide) binding motif	99620	1.95453	Phosphopantetheine attachment site
94301	-1.77694	SAM (and some other nucleotide) binding motif	92689	-3.28794	Phosphopantetheine-binding
88167	1.72531	Serine/threonine dehydratase, pyridoxal-phosphate-binding site	46523	2.33098	Polysaccharide deacetylase
20308	-2.18458	Serine/threonine protein kinase	46526	2.05032	Polysaccharide deacetylase
23483	1.24017	Serine/threonine protein kinase	47053	3.67902	Polysaccharide deacetylase
26829	-2.37279	Serine/threonine protein kinase	93226	2.35325	Polysaccharide deacetylase
41744	1.47837	Serine/threonine protein kinase	95544	-1.26108	PPR repeat
88616	1.36341	Serine/threonine protein kinase	26829	-2.27565	Protein kinase
20308	-2.18458	Serine/threonine protein kinase, active site	27981	1.37129	Protein kinase
23483	1.24017	Serine/threonine protein kinase, active site	89742	-1.8387	Protein kinase
41744	1.47837	Serine/threonine protein kinase, active site	98741	-2.2164	Protein kinase
88616	1.36341	Serine/threonine protein kinase, active site	98775	1.77257	Protein kinase
24749	1.47268	Short-chain dehydrogenase/reductase SDR	97843	1.94176	Protein of unknown function DUF1264
25916	-2.8857	Short-chain dehydrogenase/reductase SDR	36449	1.42713	Protein of unknown function DUF59
35284	-1.43644	Short-chain dehydrogenase/reductase SDR	99143	-1.09985	Protein of unknown function DUF590
86965	-2.09921	Short-chain dehydrogenase/reductase SDR	94494	1.7677	Protein of unknown function DUF726
87849	1.88201	Short-chain dehydrogenase/reductase SDR	38143	1.38459	Protein of unknown function DUF77
89996	1.74144	Short-chain dehydrogenase/reductase SDR	96500	1.76346	Protein of unknown function UPF0031
93130	2.69484	Short-chain dehydrogenase/reductase SDR	87606	1.67253	Protein tyrosine phosphatase, catalytic region
95635	3.63486	Short-chain dehydrogenase/reductase SDR	92415	-1.28381	Putative phosphatase regulatory subunit
87359	-1.33774	Single-strand binding protein/Primosomal replication protein n	94887	-2.93414	Pyridine nucleotide-disulphide oxidoreductase, class-II
95211	-2.03893	Smr protein/MutS2 C-terminal	88167	1.64374	Pyridoxal-5'-phosphate-dependent enzyme, beta subunit
36126	1.89796	SNO glutamine amidotransferase	20333	-2.87974	Pyruvate decarboxylase
91044	4.5471	Sugar transporter	96608	-1.36742	Ras GTPase
92003	5.09652	Sugar transporter	96608	-1.36742	Ras small GTPase, Rab type
91044	4.5471	Sugar transporter superfamily	96608	-1.36742	Ras small GTPase, Ras type
92003	5.09652	Sugar transporter superfamily	96608	-1.36742	Ras small GTPase, Rho type
95121	-1.78147	Sulfate transporter/antisigma-factor antagonist STAS	97634	2.98853	RecA bacterial DNA recombination protein
93052	-3.41262	Survival protein SurE	92689	-3.28794	Ribonuclease II
55267	3.60145	Tannase and feruloyl esterase	87004	-1.48514	Ribosomal L28e protein
55907	4.28708	Tannase and feruloyl esterase	36658	-1.453	Ribosomal protein L6
62952	1.58886	Tannase and feruloyl esterase	96963	-1.83082	Ricin B lectin
89958	4.74032	Taurine catabolism dioxygenase TauD/TfdA	96965	-2.24543	Ricin B lectin
90756	1.44723	Taurine catabolism dioxygenase TauD/TfdA	96535	1.31963	RNA-binding region RNP-1 (RNA recognition motif)
39403	1.44834	Tetracycline resistance protein TetB	97020	1.19437	RTA1 like protein
91599	1.40433	Thioesterase	35364	-1.6699	SAM (and some other nucleotide) binding motif
87630	-1.27355	Thiolase	89073	2.41262	SAM (and some other nucleotide) binding motif
91327	3.48055	TonB box, N-terminal	89636	-1.3565	SAM (and some other nucleotide) binding motif
92699	1.44247	TonB box, N-terminal	94301	-1.67507	SAM (and some other nucleotide) binding motif
95148	-1.1355	TPR repeat	96642	1.26093	SAM (and some other nucleotide) binding motif
92937	-1.68998	Tropomyosin	99234	-1.73874	SAM (and some other nucleotide) binding motif
20308	-2.18458	Tyrosine protein kinase	88167	1.64374	Serine/threonine dehydratase, pyridoxal-phosphate-binding site
23483	1.24017	Tyrosine protein kinase	26829	-2.27565	Serine/threonine protein kinase
41744	1.47837	Tyrosine protein kinase	25916	-3.49329	Short-chain dehydrogenase/reductase SDR
88616	1.36341	Tyrosine protein kinase	86965	-2.11395	Short-chain dehydrogenase/reductase SDR
42043	2.27779	Tyrosine protein kinase, active site	87849	2.19145	Short-chain dehydrogenase/reductase SDR
90993	-3.11198	Tyrosine protein kinase, active site	89996	2.08662	Short-chain dehydrogenase/reductase SDR
93684	-1.88705	Tyrosine protein kinase, active site	93130	2.16976	Short-chain dehydrogenase/reductase SDR
96268	-2.62864	Tyrosine protein kinase, active site	96963	-1.83082	Short-chain dehydrogenase/reductase SDR
87606	2.13672	Tyrosine specific protein phosphatase	97126	1.9438	Short-chain dehydrogenase/reductase SDR
27666	1.89054	Tyrosine specific protein phosphatase and dual specificity	97708	2.72104	Short-chain dehydrogenase/reductase SDR
87606	2.13672	Tyrosine specific protein phosphatase and dual specificity	98054	2.74978	Short-chain dehydrogenase/reductase SDR
94247	-2.80249	UbiA prenyltransferase	99281	-1.44208	Short-chain dehydrogenase/reductase SDR
89800	1.82323	UbiE/COQ5 methyltransferase	23327	1.11309	Silent information regulator protein Sir2
40330	-1.67897	UV-endonuclease UvdE	87359	-1.41515	Single-strand binding protein/Primosomal replication protein n
95893	1.41488	Vitamin K-dependent carboxylation/gamma-carboxyglutamic region	96608	-1.36742	Small GTP-binding protein domain
29770	-1.54033	XPG I	91044	4.50266	Sugar transporter
29770	-1.54033	XPG N-terminal	92003	4.99078	Sugar transporter
27460	4.5035	Zinc-containing alcohol dehydrogenase	22289	-2.39476	Sugar transporter superfamily
87428	2.1898	Zinc-containing alcohol dehydrogenase	91044	4.50266	Sugar transporter superfamily
87967	3.74242	Zinc-containing alcohol dehydrogenase	92003	4.99078	Sugar transporter superfamily
88715	3.55431	Zinc-containing alcohol dehydrogenase	95121	-1.48858	Sulfate transporter/antisigma-factor antagonist STAS
89504	5.02625	Zinc-containing alcohol dehydrogenase	93052	-4.29974	Survival protein SurE
89734	4.44389	Zinc-containing alcohol dehydrogenase	55267	3.79566	Tannase and feruloyl esterase
24676	1.61412	Zinc-containing alcohol dehydrogenase superfamily	55907	4.26953	Tannase and feruloyl esterase
87428	2.1898	Zinc-containing alcohol dehydrogenase superfamily	62952	2.18227	Tannase and feruloyl esterase
87967	3.74242	Zinc-containing alcohol dehydrogenase superfamily	89958	4.60128	Taurine catabolism dioxygenase TauD/TfdA
88101	1.4815	Zinc-containing alcohol dehydrogenase superfamily	99496	-2.91909	Terpene synthase, metal-binding
88114	1.70906	Zinc-containing alcohol dehydrogenase superfamily	39403	1.27282	Tetracycline resistance protein TetB
88183	2.32786	Zinc-containing alcohol dehydrogenase superfamily	99098	2.00863	ThiJ/PfpI
88715	3.55431	Zinc-containing alcohol dehydrogenase superfamily	91599	1.7685	Thioesterase
89504	5.02625	Zinc-containing alcohol dehydrogenase superfamily	91327	2.61042	TonB box, N-terminal
89734	4.44389	Zinc-containing alcohol dehydrogenase superfamily	92699	1.51987	TonB box, N-terminal
90353	2.98828	Zinc-containing alcohol dehydrogenase superfamily	92937	-1.99367	Tropomyosin
90727	3.41308	Zinc-containing alcohol dehydrogenase superfamily	95088	-1.39987	Tropomyosin
91006	-1.32658	Zinc-containing alcohol dehydrogenase superfamily	90993	-2.01101	Tyrosine protein kinase, active site
91948	3.09886	Zinc-containing alcohol dehydrogenase superfamily	93684	-1.61558	Tyrosine protein kinase, active site
93958	3.68483	Zinc-containing alcohol dehydrogenase superfamily	87606	1.67253	Tyrosine specific protein phosphatase
93376	1.60768	Zn-finger, C2H2 type	87606	1.67253	Tyrosine specific protein phosphatase and dual specificity
93416	1.27633	Zn-finger, C2H2 type	94247	-2.94509	UbiA prenyltransferase
94130	1.6755	Zn-finger, C2H2 type	89238	1.44407	Xeroderma pigmentosum group D protein
95675	1.56603	Zn-finger, C2H2 type	27460	4.56227	Zinc-containing alcohol dehydrogenase
91327	3.48055	Zn-finger, MYND type	87428	2.05718	Zinc-containing alcohol dehydrogenase
91707	-2.07295	Zn-finger, MYND type	87967	3.84908	Zinc-containing alcohol dehydrogenase
92699	1.44247	Zn-finger, MYND type	89504	4.47766	Zinc-containing alcohol dehydrogenase
			89734	4.51257	Zinc-containing alcohol dehydrogenase
			24676	1.56467	Zinc-containing alcohol dehydrogenase superfamily
			87428	2.05718	Zinc-containing alcohol dehydrogenase superfamily
			87967	3.84908	Zinc-containing alcohol dehydrogenase superfamily
			88101	2.15614	Zinc-containing alcohol dehydrogenase superfamily
			88114	1.59915	Zinc-containing alcohol dehydrogenase superfamily
			88183	2.30629	Zinc-containing alcohol dehydrogenase superfamily
			89504	4.47766	Zinc-containing alcohol dehydrogenase superfamily
			89734	4.51257	Zinc-containing alcohol dehydrogenase superfamily
			90353	2.47349	Zinc-containing alcohol dehydrogenase superfamily
			90727	2.92528	Zinc-containing alcohol dehydrogenase superfamily
			91948	2.92598	Zinc-containing alcohol dehydrogenase superfamily
			93958	3.34796	Zinc-containing alcohol dehydrogenase superfamily
			94130	1.49279	Zn-finger, C2H2 type
			99918	1.18136	Zn-finger, GATA type
			91327	2.61042	Zn-finger, MYND type
			92699	1.51987	Zn-finger, MYND type
			88779	-1.21399	Zn-finger, Tim10/DDP type

## Sheet: GSE119714
Asp vs NC			CEL vs NC			Glucose vs NC
Protein ID	Descrption		Protein	Descriptions		Protein	Descriptions
90928	Aerolysin/hemolysin toxin		87616	AAA ATPase		98124	2OG-Fe(II) oxygenase superfamily
87727	Aldo/keto reductase		96574	AAA ATPase		104938	AAA ATPase
87727	Aldo/keto reductase		104938	AAA ATPase		19791	Adaptin, N-terminal
96914	Aldo/keto reductase		87616	ABC transporter		90928	Aerolysin/hemolysin toxin
96914	Aldo/keto reductase		87616	ABC transporter		89252	Aldehyde dehydrogenase
96914	Aldo/keto reductase		87616	ABC transporter		89252	Aldehyde dehydrogenase
87770	Alpha/beta hydrolase		87616	ABC transporter		100251	Alpha-L-arabinofuranosidase, C-terminal
87770	Alpha/beta hydrolase		87616	ABC transporter		102604	Amidohydrolase
100251	Alpha-L-arabinofuranosidase, C-terminal		96574	ABC transporter		102604	Amidohydrolase-like
95335	Carbohydrate kinase, FGGY		96574	ABC transporter, transmembrane region		97704	Amino acid permease
95335	Carbohydrate kinase, FGGY		19791	Adaptin, N-terminal		98034	Amino acid permease
20448	Carboxylesterase, type B		89252	Aldehyde dehydrogenase		97704	Amino acid permease-associated region
20448	Carboxylesterase, type B		89252	Aldehyde dehydrogenase		98034	Amino acid permease-associated region
20448	Carboxylesterase, type B		102347	Aldehyde dehydrogenase		98049	Amino acid permease-associated region
43588	Carboxylesterase, type B		102347	Aldehyde dehydrogenase		97704	Amino acid/polyamine transporter I
43588	Carboxylesterase, type B		23404	Aldo/keto reductase		98034	Amino acid/polyamine transporter I
117372	Carboxylesterase, type B		23404	Aldo/keto reductase		98049	Amino acid/polyamine transporter I
117372	Carboxylesterase, type B		23404	Aldo/keto reductase		106545	Ankyrin
52869	Cytochrome b/b6, N-terminal		23404	Aldo/keto reductase		106545	Ankyrin
128099	Cytochrome b/b6, N-terminal		23404	Aldo/keto reductase		106545	Ankyrin
93317	Cytochrome P450		23404	Aldo/keto reductase		106545	Ankyrin
93317	Cytochrome P450		87727	Aldo/keto reductase		35843	ATP/GTP-binding site motif A (P-loop)
104527	Cytochrome P450		87727	Aldo/keto reductase		39207	ATP-dependent DNA helicase RecQ
104527	Cytochrome P450		89479	Aldo/keto reductase		97530	ATP-dependent DNA ligase
93317	E-class P450, group I		89479	Aldo/keto reductase		104222	ATP-dependent DNA ligase
104527	E-class P450, group I		100251	Alpha-L-arabinofuranosidase, C-terminal		39207	ATP-dependent helicase, DEAH-box
20448	Esterase/lipase/thioesterase		102604	Amidohydrolase		104696	Auxin Efflux Carrier
43588	Esterase/lipase/thioesterase		102604	Amidohydrolase-like		89404	Bromo adjacent region
87770	Esterase/lipase/thioesterase		97704	Amino acid permease		89404	Bromo adjacent region
117372	Esterase/lipase/thioesterase		97704	Amino acid permease-associated region		104794	BTB/POZ
98789	FAD linked oxidase, N-terminal		97704	Amino acid/polyamine transporter I		104794	BTB/POZ
99373	Fungal specific transcription factor		106545	Ankyrin		99338	C2
101953	General substrate transporter		106545	Ankyrin		95335	Carbohydrate kinase, FGGY
54008	Glucose-methanol-choline oxidoreductase		106545	Ankyrin		95335	Carbohydrate kinase, FGGY
54008	Glucose-methanol-choline oxidoreductase		106545	Ankyrin		99632	Carbohydrate-binding WSC
52869	Glycoside hydrolase family 2, immunoglobulin-like beta-sandwich domain		32625	Aromatic-ring hydroxylase		99632	Carbohydrate-binding WSC
128099	Glycoside hydrolase family 2, immunoglobulin-like beta-sandwich domain		100905	Aromatic-ring hydroxylase		43588	Carboxylesterase, type B
98662	Glycoside hydrolase, clan GH-D		35843	ATP/GTP-binding site motif A (P-loop)		43588	Carboxylesterase, type B
45922	Glycoside hydrolase, family 1		87616	ATP/GTP-binding site motif A (P-loop)		115141	Carboxylesterase, type B
45922	Glycoside hydrolase, family 1		96574	ATP/GTP-binding site motif A (P-loop)		115141	Carboxylesterase, type B
45922	Glycoside hydrolase, family 1		95925	ATP-dependent DNA ligase		117372	Carboxylesterase, type B
45922	Glycoside hydrolase, family 1		95925	ATP-dependent DNA ligase		117372	Carboxylesterase, type B
109743	Glycoside hydrolase, family 1		95925	ATP-dependent DNA ligase		123169	Catalase
109743	Glycoside hydrolase, family 1		95925	ATP-dependent DNA ligase		123169	Catalase
109743	Glycoside hydrolase, family 1		95925	ATP-dependent DNA ligase		123169	Catalase
109743	Glycoside hydrolase, family 1		95925	ATP-dependent DNA ligase		123169	Catalase
105534	Glycoside hydrolase, family 10		96457	ATP-dependent DNA ligase		123169	Catalase
105534	Glycoside hydrolase, family 10		96457	ATP-dependent DNA ligase		88849	CsbD-like
105534	Glycoside hydrolase, family 10		96457	ATP-dependent DNA ligase		94683	Cyclin-like F-box
112658	Glycoside hydrolase, family 12		96457	ATP-dependent DNA ligase		94683	Cyclin-like F-box
112658	Glycoside hydrolase, family 12		96457	ATP-dependent DNA ligase		94683	Cyclin-like F-box
43189	Glycoside hydrolase, family 28		96457	ATP-dependent DNA ligase		97723	Cyclin-like F-box
43189	Glycoside hydrolase, family 28		96457	ATP-dependent DNA ligase		97723	Cyclin-like F-box
45730	Glycoside hydrolase, family 28		97530	ATP-dependent DNA ligase		99429	Cyclin-like F-box
58192	Glycoside hydrolase, family 28		104222	ATP-dependent DNA ligase		42865	Cytochrome b5
104059	Glycoside hydrolase, family 28		94565	Baculovirus inhibitor of apoptosis protein repeat (BIR)		42865	Cytochrome b5
46915	Glycoside hydrolase, family 3, C-terminal		94565	Baculovirus inhibitor of apoptosis protein repeat (BIR)		42865	Cytochrome b5
112501	Glycoside hydrolase, family 3, C-terminal		94565	Baculovirus inhibitor of apoptosis protein repeat (BIR)		29102	DEAD/DEAH box helicase
46915	Glycoside hydrolase, family 3, N-terminal		96457	BRCT		29102	DEAD/DEAH box helicase
46915	Glycoside hydrolase, family 3, N-terminal		96457	BRCT		39207	DEAD/DEAH box helicase
51213	Glycoside hydrolase, family 3, N-terminal		99338	C2		39207	DEAD/DEAH box helicase
112501	Glycoside hydrolase, family 3, N-terminal		43588	Carboxylesterase, type B		29102	DEAD/DEAH box helicase, N-terminal
112501	Glycoside hydrolase, family 3, N-terminal		43588	Carboxylesterase, type B		39207	DEAD/DEAH box helicase, N-terminal
112501	Glycoside hydrolase, family 3, N-terminal		115141	Carboxylesterase, type B		102051	EGF-like
121713	Glycoside hydrolase, family 5		115141	Carboxylesterase, type B		43588	Esterase/lipase/thioesterase
121831	Glycoside hydrolase, family 5		117372	Carboxylesterase, type B		100711	Esterase/lipase/thioesterase
121831	Glycoside hydrolase, family 5		117372	Carboxylesterase, type B		115141	Esterase/lipase/thioesterase
54008	GMC oxidoreductase		105613	Caspase-1, p20		117372	Esterase/lipase/thioesterase
38391	Guanine-specific ribonuclease N1 and T1		123169	Catalase		98789	FAD linked oxidase, N-terminal
101652	Isoprenylcysteine carboxyl methyltransferase		123169	Catalase		95323	GCN5-related N-acetyltransferase
87727	KCNAB voltage-gated K+ channel, beta subunit		123169	Catalase		98662	Glycoside hydrolase, clan GH-D
35803	Major facilitator superfamily		123169	Catalase		120395	Glycoside hydrolase, clan GH-D
101953	Major facilitator superfamily		123169	Catalase		120395	Glycoside hydrolase, clan GH-D
87012	Methionine synthase, vitamin-B12 independent		88849	CsbD-like		120395	Glycoside hydrolase, family 27
106240	N-6 Adenine-specific DNA methylase		91952	Cyclin-like F-box		45730	Glycoside hydrolase, family 28
51213	NULL		97723	Cyclin-like F-box		58192	Glycoside hydrolase, family 28
121713	NULL		97723	Cyclin-like F-box		93878	Glycoside hydrolase, family 31
43189	Parallel beta-helix repeat		99493	Cyclin-like F-box		93878	Glycoside hydrolase, family 31
87770	Peptidase S33, prolyl aminopeptidase		99931	Cyclin-like F-box		107258	Glycoside hydrolase, family 31
87770	Peptidase S33, tricorn interacting factor 1		100425	Cyclin-like F-box		117029	Glycoside hydrolase, family 31
43189	Peptidase S8 and S53, subtilisin, kexin, sedolisin		94692	Cytochrome P450		99338	G-protein beta WD-40 repeat
94560	Protein kinase		94692	Cytochrome P450		29102	Helicase, C-terminal
97434	Protein kinase		99124	DH		29102	Helicase, C-terminal
97434	Protein kinase		99124	DH		39207	Helicase, C-terminal
97434	Protein kinase		99124	DH		39207	Helicase, C-terminal
97434	Serine/threonine protein kinase		92438	Disease resistance protein		27048	HpcH/HpaI aldolase
97434	Serine/threonine protein kinase, active site		105150	Disease resistance protein		27049	HpcH/HpaI aldolase
101953	Sugar transporter		99063	DNA topoisomerase II		92677	Inorganic pyrophosphatase
101953	Sugar transporter		94692	E-class P450, group I		98124	Isopenicillin N synthase
101953	Sugar transporter superfamily		97783	EGF-like		92802	Isoprenylcysteine carboxyl methyltransferase
101953	Sugar transporter superfamily		43588	Esterase/lipase/thioesterase		96339	Isoprenylcysteine carboxyl methyltransferase
93052	Survival protein SurE		99063	Esterase/lipase/thioesterase		35803	Major facilitator superfamily
93052	Survival protein SurE		115141	Esterase/lipase/thioesterase		102447	Major facilitator superfamily
94560	Tyrosine protein kinase, active site		117372	Esterase/lipase/thioesterase		95035	Metal-dependent phosphohydrolase, HD subdomain
			98789	FAD linked oxidase, N-terminal		104938	NACHT nucleoside triphosphatase
			104883	FAD-dependent pyridine nucleotide-disulphide oxidoreductase		96273	NULL
			32625	Flavoprotein monooxygenase		106332	Peptidase M, neutral zinc metallopeptidases, zinc-binding site
			127842	Fungal pheromone STE3 GPCR		100712	Phosphopantetheine attachment site
			127842	Fungal pheromone STE3 GPCR		59912	Protein kinase
			105608	GHMP kinase, ATP-binding region		59912	Protein kinase
			120395	Glycoside hydrolase, clan GH-D		59912	Protein kinase
			120395	Glycoside hydrolase, clan GH-D		92237	Protein kinase
			112658	Glycoside hydrolase, family 12		92237	Protein kinase
			112658	Glycoside hydrolase, family 12		94560	Protein kinase
			120395	Glycoside hydrolase, family 27		20168	Protein of unknown function DUF803
			58192	Glycoside hydrolase, family 28		127626	Ribosomal L23 protein
			93878	Glycoside hydrolase, family 31		127626	Ribosomal L23 protein
			93878	Glycoside hydrolase, family 31		127626	Ribosomal L23 protein
			107258	Glycoside hydrolase, family 31		119924	Ribosomal protein L10
			117029	Glycoside hydrolase, family 31		127626	Ribosomal protein L23, N-terminal
			99338	G-protein beta WD-40 repeat		98926	Serine/threonine dehydratase, pyridoxal-phosphate-binding site
			91723	GTP-binding		59912	Serine/threonine protein kinase
			91723	GTP-binding protein, HSR1-related		92237	Serine/threonine protein kinase
			37199	Heat shock protein DnaJ		59912	Serine/threonine protein kinase, active site
			37199	Heat shock protein DnaJ, N-terminal		95865	SMC protein, N-terminal
			37199	Heat shock protein DnaJ, N-terminal		98917	SMC protein, N-terminal
			37199	Heat shock protein DnaJ, N-terminal		55267	Tannase and feruloyl esterase
			37199	Heat shock protein DnaJ, N-terminal		62952	Tannase and feruloyl esterase
			27048	HpcH/HpaI aldolase		96273	Thiolase
			27049	HpcH/HpaI aldolase		59912	Tyrosine protein kinase
			92677	Inorganic pyrophosphatase		93684	Tyrosine protein kinase, active site
			106362	Isoflavone reductase		93974	Tyrosine protein kinase, active site
			92802	Isoprenylcysteine carboxyl methyltransferase		94560	Tyrosine protein kinase, active site
			87727	KCNAB voltage-gated K+ channel, beta subunit		96273	Tyrosine protein kinase, active site
			102447	Major facilitator superfamily		101903	Zn-finger, C2H2 type
			95035	Metal-dependent phosphohydrolase, HD subdomain		101903	Zn-finger, C2H2 type
			99463	Metallophosphoesterase		105108	Zn-finger, C2H2 type
			104938	NACHT nucleoside triphosphatase		105108	Zn-finger, C2H2 type
			100179	NULL		105108	Zn-finger, C2H2 type
			54936	Pectinesterase		105113	Zn-finger, C2H2 type
			98834	Peptidase M, neutral zinc metallopeptidases, zinc-binding site		88689	Zn-finger, MYND type
			106326	Peptidase M, neutral zinc metallopeptidases, zinc-binding site		88689	Zn-finger, MYND type
			106332	Peptidase M, neutral zinc metallopeptidases, zinc-binding site		88689	Zn-finger, MYND type
			100712	Phosphopantetheine attachment site
			99124	Pleckstrin/ G-protein, interacting region
			99124	Pleckstrin/ G-protein, interacting region
			24514	Protein kinase
			24514	Protein kinase
			24514	Protein kinase
			42040	Protein kinase
			59912	Protein kinase
			59912	Protein kinase
			59912	Protein kinase
			92237	Protein kinase
			92237	Protein kinase
			98834	Protein kinase
			38604	Protein of unknown function UPF0057
			105100	Protein secE/sec61-gamma protein
			104883	Pyridine nucleotide-disulphide oxidoreductase, class I
			127626	Ribosomal L23 protein
			127626	Ribosomal L23 protein
			127626	Ribosomal L23 protein
			127626	Ribosomal protein L23, N-terminal
			97976	RNA dependent RNA polymerase
			97476	RNA recognition motif 2
			24514	Serine/threonine protein kinase
			59912	Serine/threonine protein kinase
			92237	Serine/threonine protein kinase
			24514	Serine/threonine protein kinase, active site
			59912	Serine/threonine protein kinase, active site
			95865	SMC protein, N-terminal
			36126	SNO glutamine amidotransferase
			36126	SNO glutamine amidotransferase
			89479	Sugar transporter superfamily
			55267	Tannase and feruloyl esterase
			55907	Tannase and feruloyl esterase
			62952	Tannase and feruloyl esterase
			105496	Terpene synthase, metal-binding
			87630	Thiolase
			87630	Thiolase
			87630	Thiolase
			87630	Thiolase
			92438	TPR repeat
			92438	TPR repeat
			92438	TPR repeat
			92438	TPR repeat
			105150	TPR repeat
			105150	TPR repeat
			105150	TPR repeat
			105150	TPR repeat
			24514	Tyrosine protein kinase
			59912	Tyrosine protein kinase
			42040	Tyrosine protein kinase, active site
			93684	Tyrosine protein kinase, active site
			93974	Tyrosine protein kinase, active site
			105015	Tyrosine protein kinase, active site
			105934	Tyrosine protein kinase, active site
			92312	Zn-finger, C2H2 type
			92312	Zn-finger, C2H2 type
			92312	Zn-finger, C2H2 type
			93085	Zn-finger, C2H2 type
			100179	Zn-finger, C2H2 type
			101903	Zn-finger, C2H2 type
			101903	Zn-finger, C2H2 type
			102314	Zn-finger, C2H2 type
			102314	Zn-finger, C2H2 type
			105150	Zn-finger, C2H2 type

## Sheet: GSE108189
JGI-ID	B2Go Description	3vs1-FDR	3vs1-logFC	JGI-ID	B2Go Description	3vs1-FDR	3vs1-logFC		JGI-ID	B2Go Description	2vs1-FDR	2vs1-logFC	JGI-ID	B2Go Description	2vs1-FDR	2vs1-logFC
1030481	[Postia placenta Mad-698-R] XP_002474572	0.00334702	2.34012	1073378	2-nitropropane dioxygenase	0.000897139	-2.4816		1073876	2-nitropropane dioxygenase	0.00287391	-2.09151	1070082	1,2-dihydroxy-3-keto-5-methylthiopentene dioxygenase	0.00187175	2.84404
1030720	1,2-dihydroxy-3-keto-5-methylthiopentene dioxygenase	0.00130009	2.86554	1073876	2-nitropropane dioxygenase	0.00052016	-2.98274		1073378	2-nitropropane dioxygenase	0.00270133	-2.03404	1047091	2-hydroxyacid dehydrogenase	0.000546069	3.03529
1031872	2-deoxy-D-gluconate 3-dehydrogenase	0.0167884	2.4189	1049827	40S ribosomal S10	0.00146841	-2.32273		1040595	60S ribosomal L3	0.00306349	-2.22003	1074449	3-hydroxyanthranilic acid dioxygenase	0.00319668	2.28748
1033972	2-hydroxyacid dehydrogenase	0.000404885	2.98906	1041100	40S ribosomal S12	0.00134362	-2.21525		1136809	60S ribosomal L3	0.00955259	-2.02585	1048765	3-isopropylmalate dehydrogenase	0.00117482	2.45059
1034153	3-hydroxyanthranilic acid dioxygenase	0.00133259	2.62535	1143187	40S ribosomal S14	0.00114754	-2.43349		1061355	60S ribosomal L4 L1 L2	0.00281249	-2.02787	1067980	acid protease	0.0044565	4.18115
1035007	3-isopropylmalate dehydrogenase	0.000657582	2.58989	1164891	40S ribosomal S16	0.00148296	-2.00072		1040518	60S ribosomal L5	0.0021524	-2.33059	1166453	acid protease	0.00191318	2.39533
1036365	acid protease	0.0123253	2.99566	1133307	40S ribosomal S2	0.00116848	-2.19639		1157454	7 transmembrane receptor (rhodopsin family) domain	0.00107268	-2.11948	1136748	actin-like ATPase domain-containing	0.0316225	3.20665
1036779	acid protease	0.00124147	2.45606	1049178	40S ribosomal S20	0.00342728	-2.06115		1050475	acetate-- ligase	0.0014522	-2.52522	1144551	acyl- :6-aminopenicillanic-acid-acyltransferase	0.000441786	3.31145
1036996	actin-like ATPase domain-containing	0.0312546	3.13157	1040193	40S ribosomal S22	0.00179225	-2.17858		1179536	acetyl carboxylase	0.00214524	-2.22891	NA	alcohol dehydrogenase	0.000829803	3.77759
1037059	acyl- :6-aminopenicillanic-acid-acyltransferase	0.00032987	3.21935	1038227	40S ribosomal S29A	0.00240696	-2.52283		1151688	acetyl- synthetase	0.00171041	-3.70336	1132081	aldehyde dehydrogenase	0.0233154	2.55696
1037773	alcohol dehydrogenase	0.00060842	3.6868	1166677	40S ribosomal S5	0.00112783	-2.21188		1151717	acetyl- synthetase	0.0060099	-2.81423	1072224	Aldo keto reductase	0.000790503	3.61522
1037929	aldehyde dehydrogenase	0.0228822	2.49498	1182251	40S ribosomal S6	0.00165322	-2.27432		1065120	acetyl- synthetase	0.00211895	-2.15477	1156224	Aldo keto reductase	0.00157918	3.26828
1037947	Aldo keto reductase	0.00592958	2.88994	1058606	40S ribosomal S7	0.00139231	-2.22246		1166588	acid protease	0.00135125	-7.00816	1182299	Aldo keto reductase	0.000289752	3.12834
1038039	Aldo keto reductase	0.000420241	2.75524	1038692	40S ribosomal S8	0.00140026	-2.10059		NA	acid protease	0.00389295	-4.10599	1047366	Aldo keto reductase	0.00603565	2.98418
1038371	Aldo keto reductase	0.00183273	2.72564	1175477	40S ribosomal S9	0.001432	-2.08294		NA	acid protease	0.00212442	-3.14687	1041675	Aldo keto reductase	0.00056111	2.8181
1038570	Aldo keto reductase	0.00549567	2.8797	1035974	60S acidic ribosomal P0	0.00227381	-2.14037		NA	acid protease	0.00248696	-3.10552	1068415	Aldo keto reductase	0.00544382	2.65469
1038596	Aldo keto reductase	0.000487686	2.73255	1180105	60S ribosomal L11	0.00165792	-2.09586		1039250	acid protease	0.00125721	-2.84544	1143183	Aldo keto reductase	0.00576927	2.52515
1039065	Aldo keto reductase	0.00212776	3.1096	1166575	60S ribosomal L12	0.00173435	-2.11097		NA	acid protease	0.00246394	-2.70686	1037929	Aldo keto reductase	0.0135693	2.45909
1039499	Aldo keto reductase	0.000662115	3.41078	1038020	60S ribosomal L13	0.00133259	-2.25217		1050457	acidic leucine-rich nuclear phospho 32-related 1-like isoform X4	0.000938297	-5.79161	1044633	Aldo keto reductase	0.00399963	2.44501
1039955	Aldo keto reductase	0.00513616	2.44714	1042656	60S ribosomal L13a	0.00121466	-2.16911		1040895	acyl- N-acyltransferase	0.00300241	-2.35105	1175381	Aldo keto reductase	0.00175259	2.4264
1039971	Aldo keto reductase	0.00195621	2.83389	1065782	60S ribosomal L14	0.00154023	-2.09693		1048491	agmatinase	0.00412574	-2.25367	1179022	Aldo keto reductase	0.000790503	2.12122
1040207	Aldo keto reductase	0.00111542	2.51779	1033735	60S ribosomal L17 L23	0.00217903	-2.17487		1169270	alcohol oxidase	0.00736335	-2.59357	1065766	Aldo keto reductase	0.00191469	2.10819
1040467	Aldo keto reductase	0.000352884	2.35504	1035422	60S ribosomal L17 L23	0.00159126	-2.17532		1045608	alcohol oxidase	0.0014522	-2.24821	1186063	Aldo keto reductase	0.000918565	2.01225
1041175	Aldo keto reductase	0.000224868	2.96479	1171651	60S ribosomal L18	0.00148296	-2.29697		1171827	alcohol oxidase	0.000606518	-2.17621	1075731	aldo-keto reductase	0.00035719	2.23367
1041488	Aldo keto reductase	0.00058223	2.02897	1039496	60S ribosomal L18A	0.00124147	-2.1752		1141008	aldehyde dehydrogenase	0.000264808	-3.84123	NA	alpha beta-hydrolase	0.00188447	3.89507
1041675	aldo-keto reductase	0.000194687	2.30871	1147586	60S ribosomal L2 L8	0.00171812	-2.2124		1143010	aldehyde dehydrogenase	0.000476331	-3.09586	1036779	alpha beta-hydrolase	0.00075873	3.83542
1041779	Allergen Asp f 7	0.0423175	2.615	1030063	60S ribosomal L21	0.00121102	-2.143		1140621	Aldo keto reductase	0.00473588	-2.36487	1160806	alpha beta-hydrolase	0.00447812	3.09977
1042442	alpha beta-hydrolase	0.000546243	3.7609	1039883	60S ribosomal L24	0.00112282	-2.01634		1075258	alpha beta-hydrolase	0.000761274	-4.14804	1044461	alpha beta-hydrolase	0.00247923	2.9972
1042652	alpha beta-hydrolase	0.00691334	2.20124	1068018	60S ribosomal L27	0.00187798	-2.07886		1047949	alpha beta-hydrolase	0.00053533	-4.14174	1048487	alpha beta-hydrolase	0.000949966	2.89509
1043022	alpha beta-hydrolase	0.000964051	2.60865	1037721	60S ribosomal L28	0.00144024	-2.13292		NA	alpha beta-hydrolase	0.000555179	-3.66167	1160819	alpha beta-hydrolase	0.00616715	2.69658
1043034	alpha beta-hydrolase	0.00776977	2.15364	1040595	60S ribosomal L3	0.00106909	-2.69939		1046860	alpha beta-hydrolase	0.000461357	-2.8407	1179742	alpha beta-hydrolase	0.00577461	2.30254
1043046	alpha beta-hydrolase	0.00755157	2.55365	1179841	60S ribosomal L30	0.00203833	-2.13426		1054737	alpha beta-hydrolase	0.00275529	-2.4814	NA	alpha beta-hydrolase	0.00250456	2.27491
1043339	alpha beta-hydrolase	0.0127151	2.14973	1049542	60S ribosomal L31	0.00177648	-2.24656		1050871	alpha beta-hydrolase	0.00139837	-2.15348	NA	alpha beta-hydrolase	0.000938297	2.26546
1043705	alpha beta-hydrolase	0.00717193	2.04327	1041422	60s ribosomal l34-b	0.00135167	-2.06449		1159709	amine oxidase	0.000829803	-2.41199	1164100	alpha beta-hydrolase	0.00649206	2.19775
1043923	alpha beta-hydrolase	0.00462442	2.28527	1138426	60S ribosomal L37	0.00169568	-2.06274		1183344	aquaporin	0.00030455	-4.2823	1048486	Altered inheritance of mitochondria 18, mitochondrial	0.00136746	3.10048
1043924	alpha beta-hydrolase	0.00174878	3.61806	1061355	60S ribosomal L4 L1 L2	0.000999367	-2.43994		1039228	Arginase deacetylase	0.000716848	-3.23474	1049914	amidase signature enzyme	0.00263184	2.26667
1043996	alpha beta-hydrolase	0.00283269	2.05609	1040518	60S ribosomal L5	0.000669168	-2.90569		1065069	ARM repeat-containing	0.00363681	-3.02556	1050447	amidase signature enzyme	0.000255238	2.21635
1044245	Altered inheritance of mitochondria 18, mitochondrial	0.00118484	2.94248	1182776	60S ribosomal L6	0.000893953	-2.15515		1107848	Asp f 13	0.0104399	-2.62563	1172689	arabinogalactan endo-1,4-beta-galactosidase	0.00140006	3.74149
1044262	alternative oxidase	0.00108145	3.05978	1065193	60S ribosomal L7	0.00154023	-2.05102		1039514	benzoquinone reductase	0.00243632	-3.48976	1049317	aryl-alcohol oxidase	0.0245277	3.35085
1044461	amidase signature enzyme	0.00146002	2.42604	1148209	60S ribosomal L9	0.00120864	-2.04111		1046518	beta-lactamase transpeptidase	0.0109695	-2.46012	1156721	aspartic peptidase A1	0.00444496	4.2563
1044633	amidase signature enzyme	0.000155829	2.20571	1157454	7 transmembrane receptor (rhodopsin family) domain	0.000713871	-2.14498		NA	C-3 sterol dehydrogenase	0.000496572	-2.11163	NA	autophagy atg27	0.00302751	2.57977
1044634	arabinogalactan endo-1,4-beta-galactosidase	0.00168136	3.24922	1050475	acetate-- ligase	0.00115256	-2.46702		1033185	caib baif family enzyme	0.000894322	-2.51423	1093755	c2h2 conidiation transcription factor	0.0179257	4.03417
1044698	aryl-alcohol dehydrogenase	0.000936107	2.36859	1179536	acetyl carboxylase	0.00162215	-2.21283		1064492	cAMP-independent regulatory pac2	0.0213668	-2.04629	NA	calcium-dependent phosphotriesterase	0.000497128	2.80174
1045106	aspartic peptidase A1	0.0024633	4.58149	1065120	acetyl- synthetase	0.0010685	-2.37843		1043968	candidate G- alpha subunit	0.00204126	-3.66025	1186497	calcium-dependent phosphotriesterase	0.00990485	2.18208
1045502	aspartyl-tRNA synthetase	0.0191738	2.76821	1149247	acetyl- synthetase	0.00414213	-2.39406		NA	carbohydrate esterase family 4	0.000203097	-3.67013	1067618	Carbohydrate Esterase Family 16	0.00217736	3.00584
1045667	autophagy atg27	0.00228166	2.5629	1151688	acetyl- synthetase	0.000675445	-4.38275		NA	carbohydrate-binding module family 13	0.00334843	-3.33186	1179218	carbohydrate esterase family 16	0.00129813	2.94551
1046004	butanediol dehydrogenase	0.0127916	3.36481	1151717	acetyl- synthetase	0.00341938	-3.04055		1129319	carbohydrate-binding module family 13	0.00302751	-2.68066	1056430	carbohydrate esterase family 8	0.00953364	2.39907
1046005	c2h2 conidiation transcription factor	0.0307542	3.30017	1035894	acid protease	0.0011843	-2.65061		1152015	carbonic anhydrase	0.0250876	-3.22012	NA	Carbohydrate-Binding Module Family 13	0.0024593	2.41978
1046031	C2H2 type zinc-finger	0.0147891	2.00522	1039250	acid protease	0.000405507	-3.51747		1138346	carotenoid cleavage dioxygenase 1	0.00826987	-2.32829	1044262	carboxylesterase from carbohydrate esterase	0.00161992	3.00437
1046528	calcium ATPase transmembrane domain M-containing	0.0184672	2.43324	1085470	acid protease	0.00118484	-2.79851		1051716	choline transport	0.00181736	-3.68156	1178475	Cerato-platanin	0.0372571	2.17236
1047091	calcium-dependent phosphotriesterase	0.00403011	2.56364	1166588	acid protease	0.000764485	-7.81239		1184744	citrate synthase	0.00339516	-3.12217	1074934	class I glutamine amidotransferase	0.00325477	2.02987
1047366	calcium-dependent phosphotriesterase	0.000657582	2.37983	NA	acid protease	0.00181082	-4.6674		1037305	Clampless 1	0.00349887	-2.23689	1184782	class I glutamine amidotransferase	0.00787066	2.01547
1047392	candidate catalase	0.00309474	3.3576	NA	acid protease	0.00133343	-3.27317		1076314	Clavaminate synthase	0.00301696	-4.92487	1045106	Clavaminate synthase	0.00443822	2.74906
1047421	Carbohydrate Esterase Family 16	0.00289047	2.59628	NA	acid protease	0.00165322	-3.1875		1042503	Conserved oligomeric Golgi complex subunit 1	0.000321366	-2.13197	1131111	Clavaminate synthase	0.022738	2.59184
1047444	carbohydrate esterase family 16	0.00136714	2.65628	NA	acid protease	0.0013303	-2.93741		1147972	cytochrome b5	0.00102601	-2.00398	1040207	cupin domain-containing	0.000272613	2.30502
1047517	Carbohydrate-Binding Module Family 13	0.000194687	4.24178	1050457	acidic leucine-rich nuclear phospho 32-related 1-like isoform X4	0.00049874	-6.22712		1051287	cytochrome P450	0.000252666	-4.82687	1077564	cyclase	0.00016753	3.48137
1048227	carboxylesterase from carbohydrate esterase	0.00320403	2.34811	1040895	acyl- N-acyltransferase	0.00300404	-2.18311		1060503	cytochrome P450	0.000272613	-4.07853	1051817	cytochrome b2	0.00136101	2.17628
1048231	class I glutamine amidotransferase	0.00176167	2.17534	1048491	agmatinase	0.00126192	-2.78938		1137238	cytochrome P450	0.00164201	-3.92455	1049532	cytosine-purine permease, partial	0.00181409	2.09299
1048245	Clavaminate synthase	0.00166774	3.23485	1071630	alcohol dehydrogenase	0.00179054	-2.00712		1046379	cytochrome P450	0.000165362	-3.85817	1156080	dihydrodipicolinate synthetase	0.000272613	4.46544
1048399	Clavaminate synthase	0.0147358	2.82855	1045608	alcohol oxidase	0.000361775	-2.96535		1140751	cytochrome P450	0.000171653	-3.80217	1064649	dihydroxy-acid dehydratase	0.00374928	2.46325
1048409	Clavaminate synthase	0.0034177	2.10597	1094491	alcohol oxidase	0.00162215	-2.12459		1046916	cytochrome P450	0.000190489	-3.52074	1183854	Dolichyl-P-Man:Man(5) c(2)-PP-dolichyl mannosyltransferase	0.00139822	2.31053
1048486	conidiation 6	0.0360564	3.00706	1169270	alcohol oxidase	0.00475033	-2.72897		1141277	cytochrome P450	0.00113624	-2.84054	1135590	DUF1264-domain-containing	0.0475841	2.21529
1048487	conidiation 6	0.0136108	3.53253	1171827	alcohol oxidase	0.000232126	-2.53016		1060579	cytochrome P450	0.0430061	-2.81193	1184529	duf1479 domain-containing	0.00532397	3.44285
1048638	cupin domain-containing	0.000110255	2.66817	1141008	aldehyde dehydrogenase	0.000117058	-4.28276		1152422	cytochrome P450	0.00264043	-2.73535	1058779	DUF967 domain-containing	0.00158166	2.76398
1048765	cyclase	0.000134981	3.06723	1143010	aldehyde dehydrogenase	0.000258625	-3.28677		NA	cytochrome P450	0.000598176	-2.61335	1047424	enolase C-terminal domain	0.00783686	2.39406
1048792	cyclophilin	0.00634955	2.0003	1140621	Aldo keto reductase	0.00283911	-2.48419		1153401	cytochrome P450	0.0249225	-2.38508	NA	FAD NAD-binding domain-containing	0.000446044	3.01016
1048821	cytochrome b2	0.00116339	2.08593	1039271	alpha beta-hydrolase	0.00451087	-2.10404		NA	cytochrome P450	0.0193499	-2.38015	1148499	FAD NAD-P-binding domain-containing	0.000606518	2.99886
1049069	dihydrodipicolinate synthetase	0.000237421	4.0526	1046860	alpha beta-hydrolase	0.000277551	-2.92096		1150256	cytochrome P450	0.00190761	-2.31836	NA	family S53 protease	0.00314302	2.87431
1049710	dihydroxy-acid dehydratase	0.00346066	2.3406	1047949	alpha beta-hydrolase	0.000355407	-4.17035		1149966	cytochrome P450	0.00723626	-2.19538	1143392	family taurine dioxygenase	0.00190577	4.10324
1049766	Dolichyl-P-Man:Man(5) c(2)-PP-dolichyl mannosyltransferase	0.00163723	2.04321	1050871	alpha beta-hydrolase	0.000273375	-3.02237		1159998	cytochrome P450	0.00109985	-2.1942	NA	family taurine dioxygenase	0.00220291	2.77667
1049914	DUF1264-domain-containing	0.00999056	3.32814	1054737	alpha beta-hydrolase	0.00244506	-2.3723		1158493	cytochrome P450	0.00153037	-2.18246	NA	feruloyl esterase	0.000983993	3.83117
1050002	duf1479 domain-containing	0.00410367	3.42383	1065593	alpha beta-hydrolase	0.000610095	-2.10501		1153191	cytochrome P450	0.000252666	-2.1289	1130356	FMN-linked oxidoreductase	0.000974927	2.68173
1050447	DUF967 domain-containing	0.000720639	3.12293	1075258	alpha beta-hydrolase	0.000322071	-4.7825		1173537	cytochrome P450	0.00194147	-2.12328	1182607	galactan 1,3-beta-galactosidase	0.0117287	2.74477
1050479	f1 atpase assembly 11	0.0295566	2.89834	1136683	alpha beta-hydrolase	0.00699016	-2.39591		1070873	cytochrome P450 oxidoreductase	0.00187716	-2.4777	NA	general substrate transporter	0.00095584	4.45957
1051253	FAD NAD(P)-binding domain-containing	0.00358614	2.50187	NA	alpha beta-hydrolase	0.000471806	-3.4344		1150941	cytoplasmic , partial	0.0004877	-2.95758	1048638	general substrate transporter	0.000267196	4.02351
1051817	FAD NAD-binding domain-containing	0.000273375	3.08235	1159709	amine oxidase	0.000453114	-2.54029		NA	D-amino-acid oxidase	0.000628328	-3.68974	1075818	general substrate transporter	0.0159427	3.20255
1052954	FAD NAD-P-binding domain-containing	0.000353466	3.13461	1183344	aquaporin	0.000407093	-3.43459		1168809	Delta(12) fatty acid desaturase	0.00134459	-2.60119	1172955	general substrate transporter	0.0052393	2.20556
1053115	family taurine dioxygenase	0.001269	4.1899	1039228	Arginase deacetylase	0.000273375	-3.80761		1175273	delta-12 fatty acid desaturase	0.0012938	-2.02221	1149959	glycerol dehydrogenase	0.0273177	2.08465
1053557	family taurine dioxygenase	0.00131022	2.9307	1051006	ARM repeat-containing	0.00256763	-2.84593		1057927	delta-sterol C-methyltransferase	0.00210333	-2.76937	1050002	glycoside hydrolase	0.0214748	3.43563
1053687	feruloyl esterase	0.000767438	3.66692	1065069	ARM repeat-containing	0.00258883	-3.049		1059984	D-lactaldehyde dehydrogenase	0.00698742	-3.33891	NA	glycoside hydrolase	0.000267196	3.15567
1054989	fk506 suppressor	0.0365406	2.01147	1065311	ATP-dependent helicase , partial	0.000710017	-2.13596		1068108	D-lactaldehyde dehydrogenase	0.000289752	-2.91079	1030481	glycoside hydrolase	0.000920464	3.12117
1055215	FMN-linked oxidoreductase	0.00116986	2.31853	1039514	benzoquinone reductase	0.00543253	-2.6504		1059983	D-lactaldehyde dehydrogenase	0.0333914	-2.60368	1140284	glycoside hydrolase family 1	0.00813703	2.63373
1055637	general substrate transporter	0.000184494	3.86878	NA	C-3 sterol dehydrogenase	0.000411082	-2.01661		1175676	DNA repair RAD5	0.0010002	-2.12531	1186390	glycoside hydrolase family 1	0.0022256	2.19649
1056077	general substrate transporter	0.0425798	2.0172	1033185	caib baif family enzyme	0.000283686	-3.04585		1043997	domain-containing	0.00381379	-2.02691	1132099	glycoside hydrolase family 10	0.00056111	4.22724
1057879	general substrate transporter	0.00686956	3.85315	1140465	Calcium-binding and coiled-coil domain-containing 1	0.00112282	-3.15181		NA	DUF323 domain-containing	0.00420579	-2.62302	1043996	glycoside hydrolase family 10	0.000790503	3.39498
1057973	general substrate transporter	0.000610343	4.5242	1043968	candidate G- alpha subunit	0.00140026	-3.71524		NA	E3 ubiquitin- ligase UHRF1, partial	0.0112411	-2.1158	1076117	glycoside hydrolase family 115	0.00349333	2.87632
1058276	glycoside hydrolase	0.000662115	3.05464	NA	carbohydrate esterase family 4	0.000352884	-2.73806		1067806	Exopolysaccharide phosphotransferase SCO2592	0.00182426	-2.24833	1071715	glycoside hydrolase family 12	0.00217736	4.22963
1058363	glycoside hydrolase	0.0236398	3.2318	1129319	carbohydrate-binding module family 13	0.000365397	-4.40019		1053727	expansin family	0.000190489	-2.54222	1048792	glycoside hydrolase family 16	0.00333507	2.57713
1058779	glycoside hydrolase	0.000171439	3.10474	NA	carbohydrate-binding module family 13	0.00107303	-4.41713		1141222	FAD NAD(P)-binding domain-containing	0.00687444	-2.86959	NA	glycoside hydrolase family 16	0.0379748	2.19371
1058891	glycoside hydrolase family 1	0.0143769	2.18833	1151976	carbonic anhydrase	0.00030431	-2.44976		1050055	FAD NAD(P)-binding domain-containing	0.00212442	-2.67985	NA	glycoside hydrolase family 16	0.0345993	2.13816
1059387	glycoside hydrolase family 10	0.000573766	3.31475	1152015	carbonic anhydrase	0.0141361	-3.68744		1149032	FAD NAD(P)-binding domain-containing	0.00361991	-2.63436	1130854	glycoside hydrolase family 16	0.0117543	2.05835
1060235	glycoside hydrolase family 10	0.000551112	3.81553	1138346	carotenoid cleavage dioxygenase 1	0.0116229	-2.04485		1184700	FAD NAD-P-binding domain-containing	0.000790503	-3.01723	1043339	glycoside hydrolase family 2	0.00203821	2.78589
1060793	glycoside hydrolase family 115	0.0057901	2.38381	1051716	choline transport	0.000764485	-4.29565		1036953	FAD NAD-P-binding domain-containing	0.00288114	-2.83422	1157486	glycoside hydrolase family 2	0.00105671	2.63998
1061805	glycoside hydrolase family 12	0.000718694	5.374	1184744	citrate synthase	0.00367035	-2.84841		NA	FAD NAD-P-binding domain-containing	0.00477265	-2.13288	1074929	glycoside hydrolase family 2	0.00125721	2.27974
1061997	glycoside hydrolase family 16	0.00206066	2.69096	1037305	Clampless 1	0.00107303	-2.81003		1154089	family S53 protease	0.000541303	-3.10368	1075998	glycoside hydrolase family 27	0.00194652	2.74059
1062902	glycoside hydrolase family 2	0.0025293	2.43219	1076314	Clavaminate synthase	0.00198101	-5.07766		1066419	fatty acid hydroxylase	0.00181736	-2.93224	1038147	glycoside hydrolase family 27	0.010139	2.14042
1064349	glycoside hydrolase family 2	0.00167153	2.14258	1042503	Conserved oligomeric Golgi complex subunit 1	0.000125212	-2.47472		1061311	fatty acid synthase	0.000920464	-2.39404	1069652	glycoside hydrolase family 3	0.00151953	3.18069
1064649	glycoside hydrolase family 27	0.0028255	2.31054	1049629	cysteine peptidase C50	0.00158554	-2.69591		1047397	FMN-linked oxidoreductase	0.000486871	-2.32555	1160374	glycoside hydrolase family 3	0.00115249	2.50989
1064677	glycoside hydrolase family 3	0.0021777	2.66098	1046379	cytochrome P450	5.77367e-05	-4.44804		1043874	fungal-specific transcription factor domain	0.000446044	-3.3913	1148143	glycoside hydrolase family 3	0.0071705	2.4495
1065766	glycoside hydrolase family 3	0.000599795	2.69577	1046916	cytochrome P450	7.65149e-05	-4.26341		1174815	global transcription activator SNF2L1	0.0021524	-2.53643	1174812	glycoside hydrolase family 3	0.00742544	2.25913
1066421	glycoside hydrolase family 3	0.00529259	2.32273	1050195	cytochrome P450	0.000434984	-2.17136		1165052	glutamic oxaloacetic transaminase AAT1	0.000790503	-3.50448	1068430	glycoside hydrolase family 5	0.00476486	4.24366
1067172	glycoside hydrolase family 43	0.044436	2.22027	1051287	cytochrome P450	0.000134981	-4.92654		1058293	glutathione s-transferase	0.00589219	-2.62725	1164613	glycoside hydrolase family 5	0.00160956	3.45783
1067481	glycoside hydrolase family 5	0.00165422	5.22978	1051288	cytochrome P450	0.000300645	-2.11786		1040621	glutathione S-transferase C-terminal	0.000486871	-3.88569	1177854	glycoside hydrolase family 5	0.00207641	3.19884
1067618	glycoside hydrolase family 5	0.00122406	3.41523	1053302	cytochrome P450	0.00933331	-2.90564		1137221	glycerol kinase	0.00123423	-2.92318	1131418	glycoside hydrolase family 55	0.0419975	2.25593
1067980	glycoside hydrolase family 5	0.00220776	2.89253	1060503	cytochrome P450	0.000110255	-4.84238		1141951	glycoside hydrolase family 16	0.000434383	-2.67679	1165707	glycoside hydrolase family 61	0.000570903	2.25732
1068224	glycoside hydrolase family 61	0.000517795	2.10315	1060579	cytochrome P450	0.0340292	-2.93782		1038407	glycoside hydrolase family 18	0.00285631	-3.03758	1183183	glycoside hydrolase family 79	0.00127719	3.35097
1068240	glycoside hydrolase family 72	0.000821198	2.01415	1137238	cytochrome P450	0.000623592	-4.73878		1175275	glycoside hydrolase family 30	0.000486446	-2.09992	1038371	glyoxalase I	0.000272613	2.63831
1068264	glycoside hydrolase family 79	0.00114947	3.15111	1140751	cytochrome P450	9.5464e-05	-3.8584		NA	glycoside hydrolase family 5	0.00302751	-2.43844	1174762	HAD	0.031366	2.01413
1068415	glycosyltransferase family 49	0.0198506	2.11402	1141277	cytochrome P450	0.0010422	-2.65662		1038799	glycosyltransferase family 4	0.0132906	-2.25362	1157055	hexose transporter	0.001022	4.50456
1068430	glyoxalase I	0.000121045	2.93663	1142184	cytochrome P450	0.00049761	-2.21066		1046884	glyoxylate dehydrogenase	0.000190489	-6.21367	1066421	hexose transporter	0.000335348	3.27975
1069041	HAD	0.0251812	2.08234	1149966	cytochrome P450	0.00363879	-2.44093		1061434	GMC oxidoreductase	0.000272613	-4.52351	1053115	homoserine O-acetyltransferase	0.00134902	3.56105
1069652	heat shock 30	0.000739636	2.73624	1150256	cytochrome P450	0.00112801	-2.44712		1072938	H+ nucleoside cotransporter	0.00125721	-2.12642	1047517	hypothetical carboxylesterase	0.00230366	2.06581
1070082	hexokinase	0.0229129	2.77721	1152422	cytochrome P450	0.00166117	-2.8425		1037901	helix-turn-helix transcription factor, type	0.00168403	-2.51466	NA	hypothetical chitinase containing family 19 CBM	0.0302637	2.36601
1071715	hexose transporter	0.00017073	3.52241	1153191	cytochrome P450	9.76288e-05	-2.44195		1040674	heme-thiolate peroxidase	0.000174684	-2.98475	1130940	hypothetical protein DICSQDRAFT_107433	0.000920464	3.45946
1072045	hexose transporter	0.000675445	4.53049	1153401	cytochrome P450	0.0106836	-2.92869		1050466	heme-thiolate peroxidase	0.009323	-2.04633	1144177	hypothetical protein FOMPIDRAFT_1033126	0.000264808	3.0544
1072224	homoserine O-acetyltransferase	0.00102781	3.52193	1173537	cytochrome P450	0.000446819	-2.85891		1170682	hexose transporter	0.00223593	-2.98443	1061671	hypothetical protein FOMPIDRAFT_1047932	0.0117543	2.4874
1072860	HSP20-like chaperone	0.0241709	3.21761	NA	cytochrome P450	0.00597056	-3.13602		1040011	high mobility group B3-like	0.009054	-2.03085	NA	hypothetical protein FOMPIDRAFT_1141281	0.000332516	2.28768
1073203	hypothetical carboxylesterase	0.00190334	2.00281	NA	cytochrome P450	0.000410307	-2.60219		1056050	high nitrogen upregulated cytochrome P450 monooxygenase 2	0.00016753	-3.29179	1058891	hypothetical protein FOMPIDRAFT_127544	0.0289262	2.02268
1073261	hypothetical chitinase containing family 19 CBM	0.00462134	2.78219	NA	cytochrome P450	0.0017169	-2.02107		1168582	hydroxymethylglutaryl- synthase	0.00095584	-3.15436	NA	hypothetical protein PHLGIDRAFT_37731	0.000272613	2.51024
1073292	hypothetical chitinase containing family 19 CBM	0.0363274	2.19369	1070873	cytochrome P450 oxidoreductase	0.00143725	-2.43423		1116133	hypothetical blue light photoreceptor	0.000190489	-2.5097	1044698	Isochorismatase hydrolase	0.00661026	2.03283
1074449	hypothetical protein DICSQDRAFT_107433	0.000697238	3.33972	1165436	cytochrome P450 sterol C22-desaturase	0.00217903	-2.26956		1182814	hypothetical DNA photolyase	0.00187716	-2.12161	1128883	L-aminoadipate-semialdehyde dehydrogenase	0.00340154	2.7002
1074526	hypothetical protein DICSQDRAFT_59472, partial	0.0423175	4.29965	1150941	cytoplasmic , partial	0.000616962	-2.52297		1128831	hypothetical lysophospholipase	0.00101107	-2.34578	1136867	major royal jelly	0.000943719	4.48175
1074782	hypothetical protein FOMPIDRAFT_1024006	0.0402592	2.55939	NA	D-amino-acid oxidase	0.000352884	-3.94188		1038153	hypothetical protein CERSUDRAFT_113424, partial	0.00355459	-3.02631	1045667	major royal jelly	0.00662768	3.05298
1074901	hypothetical protein FOMPIDRAFT_1032959	0.0405288	2.73705	1168809	Delta(12) fatty acid desaturase	0.00116986	-2.47167		1147113	hypothetical protein CERSUDRAFT_116303	0.0013172	-2.28104	1072860	malate synthase	0.00118776	2.35603
1074934	hypothetical protein FOMPIDRAFT_1033126	0.000340856	2.4737	1057927	delta-sterol C-methyltransferase	0.000868939	-3.21801		NA	hypothetical protein CERSUDRAFT_116874	0.00623483	-2.11027	1039955	mannose-6-phosphate isomerase	0.00802222	2.63681
1075152	hypothetical protein FOMPIDRAFT_1040360	0.010465	2.16221	NA	delta-sterol C-methyltransferase	0.000237421	-2.14116		1075744	hypothetical protein CERSUDRAFT_145210	0.00122679	-2.33932	1043924	Metallo-hydrolase oxidoreductase	0.00449696	2.25475
1075731	hypothetical protein FOMPIDRAFT_1141281	0.00020629	2.29677	1059984	D-lactaldehyde dehydrogenase	0.00342167	-3.77734		NA	hypothetical protein CERSUDRAFT_87815	0.00140827	-2.37618	1169244	MFS general substrate transporter	0.000522373	4.91765
1075818	hypothetical protein FOMPIDRAFT_127544	0.0273373	2.00274	1068108	D-lactaldehyde dehydrogenase	0.000157217	-3.0807		1140847	hypothetical protein CERSUDRAFT_88672, partial	0.00214489	-3.30889	NA	MFS general substrate transporter	0.000189252	4.26102
1075998	hypothetical protein PHLGIDRAFT_37731	0.000125212	2.78221	1175676	DNA repair RAD5	0.000258625	-2.72511		NA	hypothetical protein CERSUDRAFT_95835	0.00118416	-3.32885	1170456	MFS general substrate transporter	0.000606518	4.22483
1076117	hypothetical protein TRAVEDRAFT_68613	0.0128658	2.50764	NA	DNA repair rhp51	0.00339419	-2.06301		NA	hypothetical protein DICSQDRAFT_174233	0.000476331	-2.82717	1148839	MFS general substrate transporter	0.00016753	3.73477
1076668	Isochorismatase hydrolase	0.00271361	2.34529	1142839	DNA replication licensing factor mcm10	0.00203381	-2.24284		1159994	hypothetical protein DICSQDRAFT_180997	0.000780233	-2.27594	1064677	MFS general substrate transporter	0.0019436	3.06324
1077564	L-aminoadipate-semialdehyde dehydrogenase	0.00508938	2.29622	1043997	domain-containing	0.00204577	-2.18457		1154329	hypothetical protein DICSQDRAFT_59745	0.00095584	-2.60059	1059387	MFS general substrate transporter	0.00135425	2.77418
1093755	L-iditol 2-dehydrogenase	0.000804942	2.13825	1186655	DUF323 domain-containing	0.00126944	-2.00137		1138076	hypothetical protein FOMPIDRAFT_1023629	0.00102734	-2.64102	1181147	MFS general substrate transporter	0.00300784	2.58537
1126110	major royal jelly	0.00850013	2.72175	NA	DUF323 domain-containing	0.00230471	-2.80372		NA	hypothetical protein FOMPIDRAFT_1026197	0.00477265	-2.71427	1181144	MFS general substrate transporter	0.00171041	2.28347
1127293	major royal jelly	0.000683158	4.3701	NA	E3 ubiquitin- ligase UHRF1, partial	0.00160661	-3.27471		1035034	hypothetical protein FOMPIDRAFT_1046362	0.00412574	-2.41754	NA	MFS general substrate transporter	0.000267318	2.17898
1127335	malate synthase	0.00108145	2.21337	1050701	Exopolysaccharide phosphotransferase SCO2592	0.000554108	-2.03773		1055043	hypothetical protein FOMPIDRAFT_1047359	0.0247482	-2.22152	1054989	MFS general substrate transporter	0.0019436	2.13072
1128394	malic enzyme	0.00381876	2.12949	1053727	expansin family	6.84834e-05	-3.13343		1051029	hypothetical protein FOMPIDRAFT_1050706	0.000165362	-3.04696	1060793	Molybdopterin binding	0.000190489	2.54087
1128883	mannose-6-phosphate isomerase	0.00836717	2.48645	1050055	FAD NAD(P)-binding domain-containing	0.00173733	-2.58886		1069815	hypothetical protein FOMPIDRAFT_1063697	0.000895776	-2.4471	1050003	molybdopterin binding oxidoreductase	0.00611045	2.12799
1129720	Metallo-hydrolase oxidoreductase	0.00225486	2.46324	1141222	FAD NAD(P)-binding domain-containing	0.00529259	-2.89166		1031241	hypothetical protein FOMPIDRAFT_110196	0.00436638	-2.62941	NA	nad binding rossmann fold	0.00687444	3.36689
1130346	MFS general substrate transporter	0.00162215	2.05417	1149032	FAD NAD(P)-binding domain-containing	0.0025949	-2.64553		1166328	hypothetical protein FOMPIDRAFT_1112653	0.00110217	-2.07269	1049069	NAD P-binding	0.00230366	2.91506
1130356	MFS general substrate transporter	0.000766076	2.94426	1036953	FAD NAD-P-binding domain-containing	0.00148296	-3.11284		1181609	hypothetical protein FOMPIDRAFT_1133386	0.00718997	-2.2142	1134654	NAD P-binding	0.00190513	2.61395
1130940	MFS general substrate transporter	0.00185369	2.83875	1060585	FAD NAD-P-binding domain-containing	0.0149408	-2.763		1076098	hypothetical protein FOMPIDRAFT_1136478, partial	0.000311866	-2.69542	1048245	NAD P-binding	0.0179036	2.22129
1131046	MFS general substrate transporter	9.76288e-05	3.62547	1184700	FAD NAD-P-binding domain-containing	0.00043644	-3.18336		1038376	hypothetical protein FOMPIDRAFT_81933	0.00016753	-3.10976	1149850	NAD P-binding	0.00803835	2.16277
1131111	MFS general substrate transporter	0.000339545	5.0164	NA	FAD NAD-P-binding domain-containing	0.00228166	-2.35806		1076200	hypothetical protein FOMPIDRAFT_93499	1.08731e-05	-5.42741	1042442	NAD P-binding	0.00296791	2.04685
1131534	MFS general substrate transporter	0.000274094	4.79535	1076667	family S53 protease	0.0055935	-3.17861		1143884	hypothetical protein M422DRAFT_168394	0.000196249	-4.24769	1062902	NAD-binding , partial	0.000633033	2.75143
1131642	MFS general substrate transporter	9.47297e-05	4.47259	1154089	family S53 protease	0.000193316	-3.75968		1040201	hypothetical protein PILCRDRAFT_254148	0.00487281	-5.15024	1065541	NAD-binding protein	0.0095566	2.26956
1132081	MFS general substrate transporter	0.000193316	2.08505	1066419	fatty acid hydroxylase	0.00147517	-2.83137		1045672	hypothetical protein PILCRDRAFT_812454	0.000289752	-3.56106	1038570	NAD-dependent formate dehydrogenase	0.00671124	2.73612
1132099	mitochondrial carrier	0.000463543	2.14503	1061311	fatty acid synthase	0.000598857	-2.40952		1073143	hypothetical protein PLEOSDRAFT_163136	0.0089896	-4.46479	1150611	NAD-P-binding	0.00247923	2.6007
1132320	Molybdopterin binding	7.70755e-05	2.82191	1047397	FMN-linked oxidoreductase	0.000211935	-2.62557		1038741	hypothetical protein PLEOSDRAFT_163136	0.0129417	-4.24271	1048449	NAD-P-binding	0.00207641	2.16097
1132530	Myocyte-specific enhancer factor 2D	0.000184494	2.22129	1043874	fungal-specific transcription factor domain	0.000273375	-3.48394		NA	hypothetical protein PLICRDRAFT_171494	0.00558487	-2.259	1138271	NAD-P-binding	0.0010002	2.11226
1141735	nad binding rossmann fold	0.00325322	3.83137	1151609	G2 mitotic-specific cyclin cdc13, partial	0.00115071	-2.88034		1047259	hypothetical protein POSPLDRAFT_109871	0.00217187	-3.39709	1146638	NAD-P-binding	0.0124557	2.00924
1142177	NAD P-binding	0.00195943	2.09594	1174815	global transcription activator SNF2L1	0.000764485	-3.08231		1177227	hypothetical protein SERLADRAFT_436042	0.000628596	-2.86301	1167334	nucleotide-sugar transporter, partial	0.00645659	2.11267
1143183	NAD P-binding	0.0159047	2.2137	1165052	glutamic oxaloacetic transaminase AAT1	0.000644322	-3.32759		1059323	isocitrate lyase	0.000368381	-5.0908	1052954	O methyltransferase	0.000894322	3.2228
1143328	NAD P-binding	0.00133814	3.09311	1040015	Glutathione S-transferase	0.000691997	-2.16076		1185138	-like family domain-containing 1	0.0445643	-2.16102	1043923	OPT oligopeptide transporter	0.000368932	4.37745
1143392	NAD P-binding	0.00114145	2.74795	1058293	glutathione s-transferase	0.00423592	-2.67692		1156503	L-lysine 6-oxidase	0.00605883	-3.58674	1053687	OPT oligopeptide transporter	0.00875637	4.03374
1144177	NAD P-binding	0.00849034	2.03668	1040621	glutathione S-transferase C-terminal	0.000405029	-3.68774		1073917	Magnesium transport	0.000235963	-3.71877	1050479	oxidoreductase family	0.00203994	2.40545
1144551	NAD P-binding	0.0027591	2.53947	1137221	glycerol kinase	0.000655665	-3.14395		1058710	manganese superoxide dismutase	0.00477265	-2.18789	1048231	peptidyl-prolyl cis-trans isomerase	0.001022	2.05994
1146647	NAD(P)-binding	0.00391981	2.20265	1158324	glycoside hydrolase family 13	0.0126528	-2.02247		1060823	membrane fraction	0.000165362	-4.00721	1139878	Phosphoenolpyruvate pyruvate domain-containing	0.00669352	2.2566
1146826	NAD-binding , partial	0.000327646	2.9858	1141951	glycoside hydrolase family 16	0.000366871	-2.49203		1185708	metabolite transporter	0.000474808	-2.5151	NA	Phosphoenolpyruvate pyruvate domain-containing , partial	0.00978462	2.15266
1148075	NAD-dependent formate dehydrogenase	0.00727692	2.55069	1132471	glycoside hydrolase family 17	0.00140756	-2.20752		1153138	MFS general substrate transporter	0.00447812	-2.43277	NA	P-loop containing nucleoside triphosphate hydrolase	0.00304554	2.7195
1148499	NAD-dependent formate dehydrogenase	0.0160889	2.09184	1038407	glycoside hydrolase family 18	0.00235398	-2.94733		1171562	MFS general substrate transporter	0.00127719	-2.34522	1045502	PLP-dependent transferase	0.00228665	2.18295
1148839	NAD-P-binding	0.000487686	2.28185	1175275	glycoside hydrolase family 30	0.00032987	-2.10726		1137856	MFS general substrate transporter	0.0291995	-2.32423	1055215	pre-mrna splicing factor	0.00560481	2.50208
1149850	NAD-P-binding	0.00182963	2.5866	1072172	glycoside hydrolase family 5	0.000229738	-2.37783		1141353	MFS general substrate transporter	0.00527791	-2.11266	1035007	proline-specific peptidase	0.00818071	2.08333
1150102	nucleoside hydrolase	0.00169874	2.14249	NA	glycoside hydrolase family 5	0.00112801	-2.95342		1175107	MFS general substrate transporter	0.000412099	-2.10924	1040467	reductase AKOR2	0.00293841	2.47877
1150611	O methyltransferase	0.000474585	3.39728	NA	glycoside hydrolase family 5	0.00055109	-2.24365		1139296	MFS Git1p-like glycerophosphoinositol permease	0.00591628	-3.01105	1046004	Ribonuclease Z	0.000606518	2.33187
1151098	OPT oligopeptide transporter	0.00017208	4.9358	1043572	glycoside hydrolase family 92	0.00432455	-2.03723		NA	MFS Git1p-like glycerophosphoinositol permease	0.00595279	-2.68853	1053557	SGNH hydrolase	0.00163215	2.4216
1152883	OPT oligopeptide transporter	0.00740054	4.00116	1038799	glycosyltransferase family 4	0.00725013	-2.51324		1054823	MFS monosaccharide transporter	0.000335348	-3.67605	1036996	short-chain dehydrogenases reductase,	0.00555971	2.25915
1153222	oxidoreductase family	0.00218094	2.17924	1046884	glyoxylate dehydrogenase	0.000113898	-6.45301		1143698	MFS polyamine transporter	0.00489943	-2.92245	1146647	Sorbitol dehydrogenase	0.00700705	2.52295
1155654	pali-domain-containing	0.00522163	2.16231	1061434	GMC oxidoreductase	0.000134981	-4.97911		1064660	MFS sugar transporter	0.00270212	-3.50941	1132734	sphingomyelin phosphodiesterase	0.0125194	2.43877
1156080	patatin-like phospholipase	0.00767756	2.82534	1042007	growth factor receptor domain-containing	0.000868939	-2.80613		1040149	mitochondrial carrier	0.00124374	-4.45971	1142177	sterol esterase from carbohydrate esterase family CE10	0.00112872	4.4088
1156224	peptidyl-prolyl cis-trans isomerase	0.000134981	3.17125	1076172	gtpase binding rid1	0.00142678	-2.25628		1174091	mitochondrial carrier	0.00116592	-2.62196	1046031	sterol esterase from carbohydrate esterase family CE10	0.00686422	2.41157
1156721	P-loop containing nucleoside triphosphate hydrolase	0.0017169	2.90351	1177711	guanine nucleotide binding beta subunit	0.00144414	-2.3311		1050557	mitochondrial carrier	0.000682609	-2.11521	1170155	subtilisin	0.00131087	3.3073
1157055	PLP-dependent transferase	0.000982329	2.5014	1072938	H+ nucleoside cotransporter	0.000864761	-2.13629		NA	multidrug resistance-associated ABC transporter	0.000374538	-2.72662	1046005	Sugar transporter STL1	0.00117027	3.67756
NA	pre-mrna splicing factor	0.00512752	2.40779	1037901	helix-turn-helix transcription factor, type	0.000471806	-3.20816		1156292	NAD P-binding	0.0111206	-3.18602	1175111	superoxide dismutase	0.000190489	2.35333
NA	proline-specific peptidase	0.0059659	2.13521	1040674	heme-thiolate peroxidase	0.000134981	-2.65671		1075900	NAD-dependent aldehyde dehydrogenase	0.00429882	-2.38647	1044245	Tautomerase MIF	0.00133845	2.86899
NA	pyruvate decarboxylase	0.0176366	2.39281	1170682	hexose transporter	0.000463543	-4.27594		1131483	NADH flavin oxidoreductase NADH oxidase	0.00016753	-3.73904	NA	Tautomerase MIF	0.00209514	2.6962
NA	reductase AKOR2	0.00371857	2.18591	1040011	high mobility group B3-like	0.0047051	-2.24865		NA	NADH flavin oxidoreductase NADH oxidase	0.00278099	-3.47274	1041488	TIM-barrel enzyme family	0.00256169	2.75265
NA	Ribonuclease Z	0.00055109	2.17307	1056050	high nitrogen upregulated cytochrome P450 monooxygenase 2	5.77367e-05	-4.08177		1143343	NADH flavin oxidoreductase NADH oxidase	0.00430107	-3.37578	1043046	transcription regulator	0.00247923	2.46462
NA	RNA-binding Csx1	0.000362202	2.1221	1053735	histone h1	0.00158735	-2.0962		NA	NADH:flavin oxidoreductase NADH oxidase	0.000189252	-3.60076	1049710	transcriptional regulator	0.000790503	3.19419
NA	SGNH hydrolase	0.00112004	2.47513	1137249	histone H3	0.00235398	-3.66197		1165072	NADH-cytochrome b5 reductase	0.00132011	-2.45866	1047444	triacylglycerol lipase	0.000894322	2.02559
NA	short-chain dehydrogenases reductase,	0.00217903	2.61895	1138580	histone H3	0.00248553	-2.81323		1128061	natural resistance-associated macrophage	0.00184242	-2.837	1033972	udp-glucose 4-epimerase	0.0019301	3.24013
NA	Sorbitol dehydrogenase	0.00493837	2.59565	NA	histone H4	0.00177648	-3.47085		1045699	nitronate monooxygenase	0.00617371	-2.79408	NA	UDP-glucose 4-epimerase	0.0122498	2.44616
NA	sphingomyelin phosphodiesterase	0.0112906	2.40047	1148359	histone-fold-containing	0.00215076	-2.63895		1170274	nitroreductase	0.00612771	-2.45935	1047392	xylose isomerase	0.00420579	2.01962
NA	sterol esterase from carbohydrate esterase family CE10	0.00400176	2.57856	1165418	HMG box-containing	0.00162215	-2.89096		1047019	Non-catalytic module family EXPN	0.00213533	-2.27048
NA	sterol esterase from carbohydrate esterase family CE10	0.00141726	3.72098	1030059	homeobox-domain-containing	0.000910691	-3.06055		1184913	nonribosomal peptide synthetase 12	0.000368932	-3.42361
NA	subtilisin	0.000762731	3.50403	1168582	hydroxymethylglutaryl- synthase	0.000647508	-3.15503		1048086	Nuclear fusion FUS1	0.00248894	-2.68264
NA	Sugar transporter STL1	0.00129272	3.23389	1116133	hypothetical blue light photoreceptor	9.96741e-05	-2.62968		1179479	OPT oligopeptide transporter	0.00373759	-2.21849
NA	superoxide dismutase	0.000157217	2.16206	1182814	hypothetical DNA photolyase	0.000779203	-2.45162		NA	Osmotin thaumatin	0.00677513	-3.2681
NA	Tautomerase MIF	0.000549144	3.33003	1128831	hypothetical lysophospholipase	0.000698545	-2.33023		1039388	Oxidoreductase HTATIP2	0.0010508	-4.04273
NA	Tautomerase MIF	0.00116848	2.8885	1062813	hypothetical protein BN946_scf184640.g2	0.00416295	-2.61686		1039390	Oxidoreductase HTATIP2	0.000641132	-2.84098
NA	thioredoxin	0.00146952	2.55922	1038153	hypothetical protein CERSUDRAFT_113424, partial	0.00285278	-2.95469		1180365	pentachlorophenol 4-monooxygenase	0.000190489	-3.45402
NA	TIM-barrel enzyme family	0.00300786	2.45923	1050098	hypothetical protein CERSUDRAFT_114621	0.00592067	-2.03188		1038494	peptidyl-tRNA hydrolase	0.00138434	-2.05504
NA	TOXD [Bipolaris zeicola]	0.00409014	2.44584	1147113	hypothetical protein CERSUDRAFT_116303	0.000898188	-2.30417		1039812	peroxiredoxin	0.00254955	-3.15853
NA	transcription regulator	0.00284836	2.21382	NA	hypothetical protein CERSUDRAFT_116874	0.00124147	-2.98743		1182988	peroxisomal 3-ketoacyl- -thiolase	0.00059894	-2.35516
NA	transcriptional regulator	0.000713419	2.9529	1075744	hypothetical protein CERSUDRAFT_145210	0.000404885	-2.83573		NA	phenylacetyl- ligase	0.0244727	-2.31745
NA	triacylglycerol lipase	0.000549144	2.06206	NA	hypothetical protein CERSUDRAFT_87815	0.000767123	-2.55012		1144287	Phosphoenolpyruvate pyruvate domain-containing	0.00152165	-5.52823
NA	udp-glucose 4-epimerase	0.00182897	3.00459	1140847	hypothetical protein CERSUDRAFT_88672, partial	0.000999367	-3.77471		1030437	phosphoglycerate mutase	0.00125721	-3.15551
NA	UDP-glucose 4-epimerase	0.0112208	2.39695	NA	hypothetical protein CERSUDRAFT_95835	0.000962813	-3.19088		1040078	phosphoglycerate mutase	0.0419193	-2.07899
NA	xylose isomerase	0.00112282	2.56572	1059330	hypothetical protein DICSQDRAFT_150172	0.0168266	-2.11094		1062438	phospholipid methyltransferase	0.00247923	-3.94866
				1141233	hypothetical protein DICSQDRAFT_161289	0.00417044	-2.05239		1156690	plasma membrane H+-transporting ATPase	0.00191469	-2.86496
				NA	hypothetical protein DICSQDRAFT_174233	0.000245377	-3.04503		1074039	pleiotropic drug resistance ABC transporter	0.00270785	-2.03634
				1159994	hypothetical protein DICSQDRAFT_180997	0.000567475	-2.21916		1078463	P-loop containing nucleoside triphosphate hydrolase	0.00533375	-2.79897
				1154329	hypothetical protein DICSQDRAFT_59745	0.00067354	-2.57197		1072783	P-loop containing nucleoside triphosphate hydrolase	0.000486446	-2.60207
				1064187	hypothetical protein FOMPIDRAFT_1021960	0.00114947	-2.27605		1055612	P-loop containing nucleoside triphosphate hydrolase	0.000480993	-2.02778
				1138076	hypothetical protein FOMPIDRAFT_1023629	0.000434984	-3.00033		1049216	PLP-dependent transferase	0.00123423	-2.07103
				1073608	hypothetical protein FOMPIDRAFT_1024403	0.000662115	-2.49746		1137521	polygalacturonase	0.00477265	-3.39855
				1185299	hypothetical protein FOMPIDRAFT_1024435	0.0010644	-2.64222		1045542	pore-forming toxin Hfr-2	0.00454037	-3.85947
				1036259	hypothetical protein FOMPIDRAFT_1025499	5.77367e-05	-4.27187		1143690	proline-specific peptidase	0.00936085	-2.2206
				NA	hypothetical protein FOMPIDRAFT_1026197	0.0026141	-2.93216		1184892	proteophosphoglycan 5	0.00016753	-3.17633
				1035034	hypothetical protein FOMPIDRAFT_1046362	0.00342167	-2.34671		1174375	proteophosphoglycan ppg4	0.000790503	-2.54745
				1051029	hypothetical protein FOMPIDRAFT_1050706	5.99276e-05	-2.87244		1065477	pyruvate carboxylase	0.00421708	-2.00634
				NA	hypothetical protein FOMPIDRAFT_1057694	0.000974213	-2.02518		1152220	Regulator of nonsense transcripts 1	0.00104142	-2.08504
				1069815	hypothetical protein FOMPIDRAFT_1063697	0.000375742	-2.76176		1139431	RNA-dependent RNA polymerase SHL2	0.000920464	-2.80504
				1031241	hypothetical protein FOMPIDRAFT_110196	0.0013303	-3.29972		1108887	S-adenosyl-L-methionine-dependent methyltransferase	0.000441786	-3.00583
				1056633	hypothetical protein FOMPIDRAFT_1112514	0.00271018	-2.18422		1063882	S-adenosyl-L-methionine-dependent methyltransferase	0.0349846	-2.39547
				1166328	hypothetical protein FOMPIDRAFT_1112653	0.000355407	-2.53494		1141422	salicylate hydroxylase	0.00035719	-5.1337
				1076098	hypothetical protein FOMPIDRAFT_1136478, partial	0.000155829	-2.91234		1045160	salicylate hydroxylase	0.000264808	-2.59971
				1038376	hypothetical protein FOMPIDRAFT_81933	0.000291237	-2.1287		1175527	serine-threonine rich	0.00109794	-2.4022
				1076200	hypothetical protein FOMPIDRAFT_93499	1.46843e-05	-5.1892		1045539	short chain type dehydrogenase	0.00363244	-3.18494
				1143884	hypothetical protein M422DRAFT_168394	0.000125212	-4.23056		1129769	Small glutamine-rich tetratricopeptide repeat-containing beta	0.00131858	-2.08137
				1040201	hypothetical protein PILCRDRAFT_254148	0.0103116	-3.87139		1037719	small secreted ,	0.000705354	-5.80077
				1045672	hypothetical protein PILCRDRAFT_812454	0.000156833	-3.788		1038872	sorbose reductase sou1	0.0109369	-2.32771
				1038741	hypothetical protein PLEOSDRAFT_163136	0.00436508	-5.4553		1153171	sterol esterase from carbohydrate esterase family CE10	0.000272613	-3.27358
				1073143	hypothetical protein PLEOSDRAFT_163136	0.00391062	-5.2942		1040138	subtilisin	0.00157787	-3.94926
				NA	hypothetical protein PLICRDRAFT_171494	0.00447695	-2.23348		1066234	subtilisin	0.00494625	-2.11992
				1047259	hypothetical protein POSPLDRAFT_109871	0.00256763	-3.00509		1076096	sure	0.00428066	-3.66355
				1177227	hypothetical protein SERLADRAFT_436042	0.000549144	-2.70132		1151376	terpenoid synthase	0.00095584	-2.01553
				1181440	iron reductase	0.0110266	-3.60993		1039933	tetraspannin domain	0.00360297	-2.7187
				1181462	iron reductase	0.00595709	-2.46671		1157476	Thiamin diphosphate-binding	0.00716495	-2.87363
				1059323	isocitrate lyase	0.000258625	-4.94709		1144314	THP2 domain	0.00151784	-2.02671
				1041943	kinase , partial	0.00030431	-2.22709		1103525	TPR , partial	0.00260671	-3.49135
				1048250	kinesin-domain-containing	0.00114754	-2.34075		1041265	Transcriptional repressor XBP1, partial	0.000628328	-2.9256
				1179558	kinesin-domain-containing	0.00284836	-2.56662		NA	transmembrane , , partial	0.00533375	-2.52549
				1156503	L-lysine 6-oxidase	0.00446227	-3.63867		1047744	Transmembrane 41	0.000437366	-2.20026
				1073917	Magnesium transport	0.000114189	-4.00354		1046562	UPF0187-domain-containing	0.00605883	-2.37645
				1058710	manganese superoxide dismutase	0.00529572	-2.00206		1071649	uracil-DNA glycosylase	0.00379722	-2.45495
				1075257	MAP microtubule affinity-regulating kinase 4	0.00182963	-2.66149		1070143	urea transporter	0.00302751	-2.36089
				1060823	membrane fraction	5.77367e-05	-4.77429		1047794	WD40 repeat	0.00467064	-2.02164
				1185708	metabolite transporter	0.000322071	-2.51223		1141889	zinc finger (homeobox domain)	0.001022	-2.01225
				1046397	MFS general substrate transporter	0.00182564	-2.06425		1141966	zinc-binding oxidoreductase	0.00594531	-2.557
				1141353	MFS general substrate transporter	0.00134714	-2.74171
				1153873	MFS general substrate transporter	0.000872928	-2.26264
				1157169	MFS general substrate transporter	0.0385376	-2.83198
				1171562	MFS general substrate transporter	0.00137519	-2.1098
				1178301	MFS general substrate transporter	0.000764485	-2.15055
				1183936	MFS general substrate transporter	0.000655665	-2.05647
				1139296	MFS Git1p-like glycerophosphoinositol permease	0.00403735	-3.10853
				NA	MFS Git1p-like glycerophosphoinositol permease	0.00361209	-2.85561
				1054823	MFS monosaccharide transporter	0.000157217	-4.06426
				1143698	MFS polyamine transporter	0.0025949	-3.18044
				1064660	MFS sugar transporter	0.00947564	-2.41053
				1044832	minichromosome maintenance mcm7p	0.00493407	-2.2859
				1040149	mitochondrial carrier	0.000767123	-4.59864
				1050557	mitochondrial carrier	0.00043644	-2.14557
				1164379	mitochondrial carrier	0.000411082	-3.09241
				1174091	mitochondrial carrier	0.000764485	-2.66367
				1182724	mitochondrial NAD-dependent isocitrate dehydrogenase subunit 2 precursor	0.0170645	-2.00057
				1134070	M-phase inducer phosphatase	0.00112282	-3.42232
				1043275	multidrug resistance-associated ABC transporter	0.000261976	-2.05156
				NA	multidrug resistance-associated ABC transporter	0.00027914	-2.66298
				1156292	NAD P-binding	0.00766021	-3.34914
				1075900	NAD-dependent aldehyde dehydrogenase	0.00280242	-2.44538
				1131483	NADH flavin oxidoreductase NADH oxidase	7.65149e-05	-3.65133
				1143343	NADH flavin oxidoreductase NADH oxidase	0.00256763	-3.55802
				NA	NADH flavin oxidoreductase NADH oxidase	0.00200801	-3.48934
				NA	NADH:flavin oxidoreductase NADH oxidase	7.65149e-05	-4.10936
				1165072	NADH-cytochrome b5 reductase	0.000762731	-2.60356
				1051627	NADPH oxidase isoform 1	0.000110255	-2.79497
				1128061	natural resistance-associated macrophage	0.00108145	-3.01342
				NA	NCS1 nucleoside transporter family	0.0435261	-2.78325
				1043314	nitrite reductase	0.000471428	-2.11338
				1045699	nitronate monooxygenase	0.00214836	-3.41858
				1047019	Non-catalytic module family EXPN	0.000339545	-3.40042
				1184913	nonribosomal peptide synthetase 12	0.000212544	-3.59882
				1048086	Nuclear fusion FUS1	0.00115713	-3.04085
				1165367	OPT oligopeptide transporter	0.00058223	-2.1533
				1179479	OPT oligopeptide transporter	0.00231775	-2.30508
				NA	Osmotin thaumatin	0.0034467	-3.65625
				1039388	Oxidoreductase HTATIP2	0.00055109	-4.46446
				1039390	Oxidoreductase HTATIP2	0.000413557	-2.89585
				1043263	PARP-domain-containing	0.00283269	-2.06611
				1180365	pentachlorophenol 4-monooxygenase	0.000125212	-3.35358
				1038494	peptidyl-tRNA hydrolase	0.000767438	-2.18655
				1039812	peroxiredoxin	0.00235595	-2.97403
				1182988	peroxisomal 3-ketoacyl- -thiolase	0.000261976	-2.6361
				1155900	peroxysomal citrate synthase	0.00162215	-2.36149
				NA	peroxysomal citrate synthase	0.00305544	-2.06997
				1045507	Phenol 2-monooxygenase	0.0228326	-2.80947
				NA	phenylacetyl- ligase	0.0129663	-2.66697
				1057403	phenylalanine ammonia-lyase	0.0475151	-2.79068
				1065275	Phenylalanine--tRNA ligase, mitochondrial	0.00128542	-2.9401
				1144287	Phosphoenolpyruvate pyruvate domain-containing	0.000792052	-6.12609
				1030437	phosphoglycerate mutase	0.000902715	-3.13585
				1040078	phosphoglycerate mutase	0.00628503	-3.35417
				1062438	phospholipid methyltransferase	0.00139231	-4.26974
				1156690	plasma membrane H+-transporting ATPase	0.00162215	-2.74929
				1061962	PLC-like phosphodiesterase	0.00123454	-2.06936
				1074039	pleiotropic drug resistance ABC transporter	0.00180998	-2.07961
				1055612	P-loop containing nucleoside triphosphate hydrolase	0.00023625	-2.21331
				1068933	P-loop containing nucleoside triphosphate hydrolase	0.00207245	-2.47176
				1072783	P-loop containing nucleoside triphosphate hydrolase	0.000194687	-2.99458
				1078463	P-loop containing nucleoside triphosphate hydrolase	0.00120101	-3.81187
				NA	P-loop containing nucleoside triphosphate hydrolase	0.000662115	-2.22073
				1049216	PLP-dependent transferase	0.00052016	-2.34355
				1137521	polygalacturonase	0.000355407	-6.6634
				1045542	pore-forming toxin Hfr-2	0.010999	-2.87181
				1143690	proline-specific peptidase	0.0040896	-2.57916
				1046600	Proteasome subunit alpha type-4	0.00197522	-2.11893
				1184892	proteophosphoglycan 5	7.65149e-05	-3.54687
				1174375	proteophosphoglycan ppg4	0.000556782	-2.51945
				1152220	Regulator of nonsense transcripts 1	0.000766076	-2.05173
				1116365	ribonuclease T1	0.0104841	-3.05394
				1151043	ribonucleotide reductase small subunit	0.00292797	-2.83252
				NA	ribosomal 60S	0.00283684	-2.07834
				NA	ribosomal L22e	0.00254347	-2.05125
				1047743	ribosomal L36e	0.000964051	-2.15327
				1181519	ribosomal L38e	0.00207726	-2.07121
				1181413	ribosomal L4	0.00162215	-2.18321
				1045879	rna helicase	0.00389921	-2.30471
				1060788	rna helicase	0.00108194	-2.01819
				1183860	RNA-binding domain-containing	0.00235111	-2.11265
				1139431	RNA-dependent RNA polymerase SHL2	0.000224509	-3.71193
				1063882	S-adenosyl-L-methionine-dependent methyltransferase	0.0116113	-3.17041
				1108887	S-adenosyl-L-methionine-dependent methyltransferase	0.000237421	-3.19792
				1045160	salicylate hydroxylase	7.65149e-05	-3.39809
				1141422	salicylate hydroxylase	0.000146057	-6.04747
				1157525	Serine threonine- kinase ark1	0.00335913	-2.013
				1175527	serine-threonine rich	0.000137458	-3.83596
				1060776	SET domain-containing	0.0239997	-2.01241
				1045539	short chain type dehydrogenase	0.00235398	-3.28425
				1129769	Small glutamine-rich tetratricopeptide repeat-containing beta	0.000471806	-2.49561
				1037719	small secreted ,	0.000279831	-6.93235
				1031342	Smr domain-containing	0.000134981	-2.70972
				1151694	SNF2 family DNA-dependent ATPase	0.00161267	-2.07315
				1038872	sorbose reductase sou1	0.00500432	-2.68526
				1181533	sphingolipid C9-methyltransferase	0.00598081	-2.33592
				1153171	sterol esterase from carbohydrate esterase family CE10	0.000134981	-3.59214
				NA	stu1, partial	0.0030966	-2.52579
				1040138	subtilisin	0.000767123	-4.4128
				1066234	subtilisin	0.00258883	-2.30026
				1076096	sure	0.00297856	-3.70396
				1151376	terpenoid synthase	0.000184494	-2.80397
				1038754	tetraspanin Pls1 family	0.000291237	-2.65239
				1039933	tetraspannin domain	0.00248749	-2.75443
				1157476	Thiamin diphosphate-binding	0.00229861	-3.58217
				1144314	THP2 domain	0.000661186	-2.2975
				1103525	TPR , partial	0.000821223	-4.55064
				1041265	Transcriptional repressor XBP1, partial	0.000435281	-2.92157
				NA	transmembrane , , partial	0.00144004	-3.29161
				1047744	Transmembrane 41	0.000177899	-2.50676
				NA	triacylglycerol lipase	0.0197407	-2.07291
				1046562	UPF0187-domain-containing	0.00426424	-2.43287
				1071649	uracil-DNA glycosylase	0.0026043	-2.49329
				1070143	urea transporter	0.00119554	-2.76221
				1044955	WD40 repeat	0.00162215	-2.50099
				1047794	WD40 repeat	0.00151799	-2.47032
				1173606	WD40 repeat	0.00199443	-2.72561
				1044893	white collar 2 type of transcription factor	0.000471806	-2.19271
				1141889	zinc finger (homeobox domain)	0.00030431	-2.47922
				1141966	zinc-binding oxidoreductase	0.00428888	-2.60189

## Sheet: Common Rhodonia placenta
Protein-IDs of Commonly Expressed CAZymes among all the Datasets	Protein-IDs of Commonly Expressed InterPro IDs among all the Datasets
GSE12540-GSE29656	GSE12540-GSE29656
107968 GH18 GH	93559 Pyrokinin
111314 AA1_1 Laccase	96655 Peptidase A1, pepsin
112941 GH16 GH	96655 Peptidase A1, pepsin
	96655 Peptidase aspartic, active site
GSE12540-69004	97899 AAA ATPase, central region
104878 GH128 GH	97899 AAA ATPase
114395 GH2 GH	98940 NULL
116123 CE4 Carbohydrate Esterase Family	99246 TEA/ATTS
120395 GH27 GH	99692 Permease for cytosine/purines, uracil,
121831 GH5_7 GH	103805 Zn-finger, C2H2 type
126595 GH18 GH	104834 Caspase-1, p20
127993 GH35 GH	104834 Endoplasmic reticulum targeting sequence
128099 GH2 GH	105491 CDR ABC transporter
128500 GH3 GH	106002 Ribosomal RNA methyltransferase RrmJ/FtsJ
129476 GH2 GH	107968 Chitinase II
	107968 GH18
GSE12540-GSE84529	107968 Carbohydrate-binding domain, family V/XII
100251 GH51 GH	107968 Carbohydrate-binding domain, family V/XII
104059 GH28 GH	107968 Chitinase II
105711 GH28 GH	107968 Glycoside hydrolase, chitinase active
109824 AA1_2 Ferroxidase	111314 Multicopper oxidase, type 1
116199 GH5_15 GH	111314 Multicopper oxidase, type 1
117029 GH31 GH
121713 GH5_22 GH	GSE12540-GSE29656-GSE69004
43190 GH28 GH	24514 Protein kinase
46915 GH3 GH	24514 Protein kinase
53332 GH18 GH	24514 Tyrosine protein kinase
54928 CE8 Carbohydrate Esterase Family	24514 Serine/threonine protein kinase
57564 GH2 GH	24514 Protein kinase
62300 GH16 GH	24514 Serine/threonine protein kinase, active
90501 GH17 GH	91803 Argonaute and Dicer protein,
92024 AA3_2 GMC oxidoreductase fragment	91803 Stem cell self-renewal protein
94557 GH51 GH	91803 Argonaute and Dicer protein,
94601 GH16 GH	91803 Stem cell self-renewal protein
97750 GT8 GlycosylTransferase Family 8	97939 Cytochrome P450
	97939 E-class P450, group I
GSE69004-GSE84529	97939 Cytochrome P450
27847 AA3 Auxiliary Activity Family	98866 GH71
51311 GH16 GH	98866 GH71
57386 GH5_9 GH	103443 GTP cyclohydrolase I
92479 GT20 GlycosylTransferase Family 20	106456 Monooxygenase, FAD-binding
	127291 Lipase, class 3
GSE12540|GSE29656|GSE69004	127291 Esterase/lipase/thioesterase
98866 GH71 GH
	GSE12540-GSE29656-GSE69004-GSE84529
GSE12540|GSE29656|GSE84529	98329 Cytochrome P450
58192 GH28 GH	98329 E-class P450, group I
	98329 Cytochrome P450
GSE12540|GSE69004|GSE84529	98329 Cytochrome P450
105952 GH95 GH	100199 Cyclin-like F-box
GSE29656|GSE69004|GSE84529	GSE12540-GSE29656-GSE84529
101010 GT1 GlycosylTransferase Family 1	55267 Tannase and feruloyl esterase
	58192 GH28
GSE12540|GSE29656|GSE69004|GSE84529	95335 Carbohydrate kinase, FGGY
105490 GH55 GH	95335 Carbohydrate kinase, FGGY
	97634 RecA bacterial DNA recombination
	GSE12540-GSE69004
	19691 Putative Ig
	19691 Dystroglycan-type cadherin-like
	20877 Ribosomal protein S2
	22049 Protein kinase
	22049 Tyrosine protein kinase
	22049 Serine/threonine protein kinase
	22049 Serine/threonine protein kinase, active
	22788 Protein kinase
	22788 Tyrosine protein kinase
	22788 Serine/threonine protein kinase
	22788 Serine/threonine protein kinase, active
	28140 RPEL repeat
	33879 HMG-CoA lyase-like
	35003 HypB/UreG, nucleotide-binding
	35003 Urease accessory protein UreG
	35007 UbiA prenyltransferase
	38113 BolA-like protein
	41078 Protein of unknown function
	43009 Zn-finger, C2H2 type
	88045 Peptidase S16, lon protease
	88045 AAA ATPase, central region
	88045 Peptidase S16, lon C-terminal
	88045 AAA ATPase
	88045 Peptidase S16, ATP-dependent protease
	88045 ATP/GTP-binding site motif A
	88045 Peptidase S16, active site
	89729 UbiE/COQ5 methyltransferase
	89729 Generic methyltransferase
	89729 SAM (and some other
	90945 NULL
	91453 Universal stress protein (Usp)
	91453 UspA
	92128 Zn-finger, CCHC type
	92391 Protein kinase
	92777 2Fe-2S ferredoxin, iron-sulfur binding
	92951 Basic helix-loop-helix dimerisation region
	92951 NULL
	93076 Glucose/ribitol dehydrogenase
	93084 Zn-finger, C2H2 type
	93472 N-6 Adenine-specific DNA methylase
	93794 Cyclin-like F-box
	93794 TBP-interacting 120
	93794 HEAT
	94597 Zn-finger, CCHC type
	95537 Peptidase M, neutral zinc
	95735 Peptidase A1, pepsin
	95735 Peptidase aspartic, active site
	95965 Zn-finger, CCHC type
	96518 Peptidase C48, SUMO/Sentrin/Ubl1
	96591 Zn-finger, CCHC type
	96685 CBF/Mak21
	96957 Zn-finger-like, PHD finger
	96957 Immunoglobulin/major histocompatibility complex
	98310 Zn-finger, CCHC type
	98935 Zn-finger, CCHC type
	99730 Oxidoreductase
	99730 Oxidoreductase
	100123 NULL
	100242 Protein kinase
	100242 Tyrosine protein kinase
	100242 Serine/threonine protein kinase
	100242 Major facilitator superfamily
	100242 Serine/threonine protein kinase, active
	100286 Helix-turn-helix, Fis-type
	100817 Zn-finger, CCHC type
	101173 Ubiquitin system component Cue
	102237 Carbohydrate kinase, PfkB
	102522 Zn-finger, CCHC type
	103917 Basic helix-loop-helix dimerisation region
	103917 NULL
	105259 IQ calmodulin-binding region
	108707 Guanine nucleotide binding protein
	109275 Calcium-binding EF-hand
	109275 Calcium-binding protein, S-100/ICaBP type
	109275 Recoverin
	109275 Parvalbumin
	112228 Protein kinase
	112228 Tyrosine protein kinase
	112228 Serine/threonine protein kinase
	112228 Serine/threonine protein kinase, active
	112798 Protein kinase
	112798 Protein kinase
	112798 Tyrosine protein kinase
	112798 Serine/threonine protein kinase
	112798 Serine/threonine protein kinase, active
	113593 Guanine nucleotide binding protein
	113593 Fungal G-protein, alpha subunit
	115141 Carboxylesterase, type B
	115141 Esterase/lipase/thioesterase
	116123 Polysaccharide deacetylase
	120395 Glycoside hydrolase, clan GH-D
	120395 GH27
	121831 GH5
	122782 Guanine nucleotide binding protein
	122782 Fungal G-protein, alpha subunit
	126595 GH18
	126595 Chitinase II
	126595 Glycoside hydrolase, chitinase active
	127993 GH35
	127993 G-protein beta WD-40 repeat
	128099 GH 2,
	128099 Cytochrome b/b6
	128500 GH3,
	128541 Bacterial sensor protein
	128541 Histidine kinase A
	128541 Histidine kinase, HAMP region
	128541 ATP-binding region, ATPase-like
	128541 Histidine kinase
	129476 GH 2,
	129974 Response regulator receiver
	129974 Histidine kinase A
	129974 GAF
	GSE12540-GSE69004-GSE84529
	23306 Flavin-containing monooxygenase FMO
	24756 2-nitropropane dioxygenase, NPD
	24756 FMN/related compound-binding core
	27005 Cytochrome c heme-binding site
	50078 Carboxylesterase, type B
	50078 Esterase/lipase/thioesterase
	50078 Carboxylesterase, type B
	50078 Carboxylesterase, type B
	87630 Thiolase
	87630 Thiolase
	87630 Thiolase
	87630 Thiolase
	90902 Aromatic-ring hydroxylase
	90902 Flavoprotein monooxygenase
	90902 Monooxygenase, FAD-binding
	90902 NAD-binding site
	94507 NULL
	95467 Esterase/lipase/thioesterase
	95467 Lipolytic enzyme
	104195 FAD-dependent pyridine nucleotide-disulphide oxidoreductase
	106546 Major facilitator superfamily
	GSE12540-GSE84529
	20333 Pyruvate decarboxylase
	22289 Major facilitator superfamily
	22289 Sugar transporter superfamily
	22746 Aromatic-ring hydroxylase
	22746 Ankyrin
	22746 Flavoprotein monooxygenase
	23052 Aromatic-ring hydroxylase
	23052 Flavoprotein monooxygenase
	26886 Isoprenylcysteine carboxyl methyltransferase
	27981 Protein kinase
	27981 Protein kinase
	28683 2-nitropropane dioxygenase, NPD
	32664 Major facilitator superfamily
	33906 Lipase, active site
	34850 Intradiol ring-cleavage dioxygenase
	34850 Catechol dioxygenase
	34850 Intradiol ring-cleavage dioxygenase
	38576 BolA-like protein
	43190 GH28
	43190 Parallel beta-helix repeat
	43190 GH28
	46915 GH3,
	46915 GH3,
	46915 GH3,
	47053 Polysaccharide deacetylase
	53332 GH18
	53332 Carbohydrate-binding domain, family V/XII
	53332 Carbohydrate-binding domain, family V/XII
	53332 Glycoside hydrolase, chitinase active
	54928 Pectinesterase
	55907 Tannase and feruloyl esterase
	64334 Esterase/lipase/thioesterase
	64334 Lipolytic enzyme
	86965 Short-chain dehydrogenase/reductase SDR
	86965 Glucose/ribitol dehydrogenase
	86965 Short-chain dehydrogenase/reductase SDR
	87616 ABC transporter
	87616 ABC transporter
	87616 AAA ATPase
	87616 ABC transporter
	87616 ATP/GTP-binding site motif A
	87616 ABC transporter
	87616 ABC transporter
	87727 Aldo/keto reductase
	87727 KCNAB voltage-gated K+ channel,
	87727 Aldo/keto reductase
	87967 GroES-related
	87967 Zinc-containing alcohol dehydrogenase superfamily
	87967 Zinc-containing alcohol dehydrogenase
	88101 Zinc-containing alcohol dehydrogenase superfamily
	89252 Aldehyde dehydrogenase
	89252 Aldehyde dehydrogenase
	89354 Beta-lactamase-like
	89741 Cytochrome P450
	89741 E-class P450, group I
	89741 Cytochrome P450
	89741 Cytochrome P450
	89958 Taurine catabolism dioxygenase TauD/TfdA
	90029 Kinesin, motor region
	90029 Kinesin, motor region
	90029 Kinesin, motor region
	90029 Kinesin, motor region
	90503 Aldo/keto reductase
	90503 Aldo/keto reductase
	90503 Aldo/keto reductase
	90796 3-beta hydroxysteroid dehydrogenase/isomerase
	91476 Cytochrome c heme-binding site
	92020 GCN5-related N-acetyltransferase
	92024 Carboxylesterase, type B
	92024 Mitochondrial substrate carrier
	92024 GMC oxidoreductase
	92024 NULL
	92811 Cyclin-like F-box
	92811 Isoprenylcysteine carboxyl methyltransferase
	94244 Phosphatidylserine decarboxylase-related
	94267 Late embryogenesis abundant protein
	94969 Esterase/lipase/thioesterase
	95148 TPR repeat
	95148 TPR repeat
	95148 TPR repeat
	95148 TPR repeat
	95150 Cyclin-like F-box
	95180 Inorganic pyrophosphatase
	95211 Smr protein/MutS2 C-terminal
	95211 Smr protein/MutS2 C-terminal
	95211 Smr protein/MutS2 C-terminal
	96777 Fungal specific transcription factor
	96901 Isopenicillin N synthase
	96901 2OG-Fe(II) oxygenase superfamily
	96914 Aldo/keto reductase
	96914 Aldo/keto reductase
	96914 Aldo/keto reductase
	97020 RTA1 like protein
	97355 Glutathione S-transferase
	97355 Glutathione S-transferase
	97355 Glutathione S-transferase
	97355 Glutathione S-transferase
	98518 D-isomer specific 2-hydroxyacid dehydrogenase,
	98518 D-isomer specific 2-hydroxyacid dehydrogenase,
	98518 D-isomer specific 2-hydroxyacid dehydrogenase,
	98518 D-isomer specific 2-hydroxyacid dehydrogenase,
	98960 Citrate synthase
	98960 Citrate synthase
	99906 Amidase
	100251 Alpha-L-arabinofuranosidase
	100834 Peptidase M, neutral zinc
	104059 GH28
	104384 Cyclin-like F-box
	104982 Glucose/ribitol dehydrogenase
	104982 Short-chain dehydrogenase/reductase SDR
	104982 Short-chain dehydrogenase/reductase SDR
	105020 OsmC-like protein
	105236 RNA-binding region RNP-1 (RNA
	105711 GH28
	109824 Multicopper oxidase, type 1
	109824 Multicopper oxidase, type 1
	109824 Multicopper oxidase, copper-binding site
	109824 TonB box
	117029 GH31
	118556 Iron permease FTR1
	121713 GH5
	121713 NULL
	GSE29656-GSE69004
	36161 BTB/POZ
	93889 Haloacid dehalogenase/epoxide hydrolase
	93889 Haloacid dehalogenase-like hydrolase
	93889 HAD-superfamily hydrolase, subfamily IA,
	99131 Lipase, class 3
	99551 Octicosapeptide/Phox/Bem1p
	102132 Dual specificity protein phosphatase
	102132 Dual specificity protein phosphatase
	102132 Dual specificity protein phosphatase
	102132 Tyrosine specific protein phosphatase
	102132 Cytochrome c heme-binding site
	102132 Tyrosine specific protein phosphatase
	108749 Ribosomal protein S10
	108749 Ribosomal protein S10
	108749 Ribosomal protein S10
	108749 Ribosomal protein S10, eukaryotic
	110044 Ribosomal protein L7Ae/L30e/S12e/Gadd45
	110044 Ribosomal protein S12E
	110044 Ribosomal protein L7Ae/L30e/S12e/Gadd45
	110044 Ribosomal protein S12E
	GSE29656-GSE69004-GSE84529
	46479 Carboxylesterase, type B
	46479 Carboxylesterase, type B
	94849 Cytochrome b5
	94849 Cytochrome b5
	94849 Cytochrome b5
	94849 Cytochrome b5
	94849 Cytochrome b5
	99918 Zn-finger, GATA type
	GSE29656-GSE84529
	87334 Cytochrome c, class IA/
	87334 Cytochrome c, class IA/
	87334 Cytochrome c, class I
	87334 Cytochrome c heme-binding site
	87716 Flavodoxin-like
	87716 Flavoprotein pyridine nucleotide cytochrome
	87716 Oxidoreductase FAD/NAD(P)-binding
	87716 Flavodoxin/nitric oxide synthase
	87716 FAD-binding
	87716 Flavodoxin/nitric oxide synthase
	88185 NADH:flavin oxidoreductase/NADH oxidase
	88597 Gamma-glutamyltranspeptidase
	88597 Gamma-glutamyltranspeptidase
	88894 Cys/Met metabolism pyridoxal-phosphate-dependent enzymes
	88965 Adenine nucleotide translocator 1
	88965 Mitochondrial substrate carrier
	88965 NULL
	89748 NADH:flavin oxidoreductase/NADH oxidase
	90769 CDP-alcohol phosphatidyltransferase
	90769 CDP-alcohol phosphatidyltransferase
	90769 CDP-alcohol phosphatidyltransferase
	90917 BTB/POZ
	90917 BTB/POZ
	90917 BTB/POZ
	92219 Cytochrome P450
	92219 E-class P450, group I
	92219 Cytochrome P450
	92219 GH16,
	95282 HAD-superfamily subfamily IB hydrolase,
	99496 Terpene synthase, metal-binding
	103090 Zinc-containing alcohol dehydrogenase superfamily
	GSE69004-GSE84529
	21733 Cytochrome P450
	21733 E-class P450, group I
	21733 Cytochrome P450
	22241 Aldehyde dehydrogenase
	25380 Lipase, class 3
	25380 Esterase/lipase/thioesterase
	25380 Lipase, active site
	27847 GMC oxidoreductase
	33280 Glutamate-cysteine ligase catalytic subunit
	36449 Protein of unknown function
	38091 Cytochrome b5
	39459 D-xylulose 5-phosphate/D-fructose 6-phosphate phosphoketolase
	45959 Hpt
	45959 Hpt
	45959 Hpt
	86766 Peptidylprolyl isomerase, FKBP-type
	86766 Peptidylprolyl isomerase, FKBP-type
	86766 NULL
	86766 NULL
	86865 Ribosomal L38e protein
	86865 Ribosomal L38e protein
	87004 Ribosomal L28e protein
	87004 Ribosomal L28e protein
	87703 Glutathione S-transferase
	88616 Protein kinase
	88616 p38 MAP kinase
	88616 Protein kinase
	88616 Tyrosine protein kinase
	88616 Serine/threonine protein kinase
	88616 Protein kinase
	88616 Serine/threonine protein kinase, active
	88616 MAP kinase
	89016 Protein kinase
	89016 Protein kinase
	89016 Tyrosine protein kinase
	89016 Serine/threonine protein kinase
	89016 Protein kinase
	89016 Protein kinase
	89016 Serine/threonine protein kinase, active
	89909 Aminotransferase, class I and
	89996 Short-chain dehydrogenase/reductase SDR
	89996 Glucose/ribitol dehydrogenase
	89996 Short-chain dehydrogenase/reductase SDR
	90226 Mandelate racemase/muconate lactonizing enzyme
	90226 Mandelate racemase/muconate lactonizing enzyme
	90226 Mandelate racemase/muconate lactonizing enzyme
	90226 Mandelate racemase/muconate lactonizing enzyme
	90353 Zinc-containing alcohol dehydrogenase superfamily
	90356 Hydantoinase B/oxoprolinase
	90475 BTB/POZ
	90475 Lipocalin-related protein and Bos/Can/Equ
	91105 Fungal transcriptional regulatory protein
	91105 Fungal transcriptional regulatory protein
	91105 Fungal specific transcription factor
	91105 Fungal transcriptional regulatory protein
	91105 Fungal transcriptional regulatory protein
	91105 Fungal transcriptional regulatory protein
	91707 Zn-finger, MYND type
	91707 Zn-finger, MYND type
	91707 Zn-finger, MYND type
	92461 Histidine acid phosphatase
	92461 Histidine acid phosphatase
	93718 Nuclear protein G9a
	93876 Fungal transcriptional regulatory protein
	93876 Aflatoxin biosynthesis regulatory protein
	93876 Fungal transcriptional regulatory protein
	93876 Fungal transcriptional regulatory protein
	93876 Fungal transcriptional regulatory protein
	93876 Fungal transcriptional regulatory protein
	93958 Zinc-containing alcohol dehydrogenase superfamily
	94247 UbiA prenyltransferase
	94570 Zn-finger, C2H2 type
	94570 Zn-finger, C2H2 type
	94570 Zn-finger, C2H2 type
	94570 Zn-finger, C2H2 type
	95833 Emopamil-binding
	95893 Heat shock protein DnaJ,
	95893 Heat shock protein DnaJ,
	95893 Heat shock protein DnaJ,
	95893 Vitamin K-dependent carboxylation/gamma-carboxyglutamic region
	95893 Heat shock protein DnaJ,
	96500 Protein of unknown function
	96500 Protein of unknown function
	97926 EGF-like
	99813 GPR1/FUN34/yaaH
	99813 GPR1/FUN34/yaaH
	99915 Cyclin-like F-box
	99915 Cyclin-like F-box
	99915 Cyclin-like F-box
	100149 Zn-finger, C2H2 type
	100149 Filamentation induced by cAMP
	102050 Protein kinase
	102050 KH, type 1
	102050 Protein kinase
	102050 Tyrosine protein kinase
	102050 Serine/threonine protein kinase
	102050 KH
	102050 Protein kinase
	102050 KH, type 1
	102050 Replication factor C conserved
	102050 Protein kinase
	102050 Serine/threonine protein kinase, active
	102050 Sugar transporter superfamily
	106191 Homeobox
	106191 Homeobox
	106191 Homeobox
	106191 Homeobox
	106649 DH
	106649 H+-transporting two-sector ATPase, alpha/beta
	112560 Translation initiation factor SUI1
	112560 Eukaryotic translation initiation factor
	112560 Translation initiation factor SUI1
	112560 NULL
	121649 Ribosomal protein S14
	GSE12540-GSE29656-GSE69004-GSE84529
	98329 Cytochrome P450
	98329 E-class P450, group I
	98329 Cytochrome P450
	98329 Cytochrome P450
	100199 Cyclin-like F-box

## Sheet: GSE78007-Top 500
protein_Id	FC ([Aspen] vs [Avicel])	Log FC ([Aspen] vs [Avicel])	FC (abs) ([Aspen] vs [Avicel])	Regulation ([Aspen] vs [Avicel])	protein_Id	FC ([Aspen] vs [Glucose])	Log FC ([Aspen] vs [Glucose])	FC (abs) ([Aspen] vs [Glucose])	Regulation ([Aspen] vs [Glucose])	protein_Id	FC ([Aspen] vs [Lodgepole])	Log FC ([Aspen] vs [Lodgepole])	FC (abs) ([Aspen] vs [Lodgepole])	Regulation ([Aspen] vs [Lodgepole])	protein_Id	FC ([Avicel] vs [Glucose])	Log FC ([Avicel] vs [Glucose])	FC (abs) ([Avicel] vs [Glucose])	Regulation ([Avicel] vs [Glucose])	protein_Id	FC ([Avicel] vs [Lodgepole])	Log FC ([Avicel] vs [Lodgepole])	FC (abs) ([Avicel] vs [Lodgepole])	Regulation ([Avicel] vs [Lodgepole])	protein_Id	FC ([Glucose] vs [Lodgepole])	Log FC ([Glucose] vs [Lodgepole])	FC (abs) ([Glucose] vs [Lodgepole])	Regulation ([Glucose] vs [Lodgepole])
137932	-3.40282e+38	-2582.45		down	137932	-3.40282e+38	-4808.01		down	22946	-3.40282e+38	-3199.26		down	137932	-3.40282e+38	-2225.56		down	22946	-3.40282e+38	-6250.88		down	22946	-3.40282e+38	-6375.9		down
92053	-3.40282e+38	-1826.9		down	167714	-3.40282e+38	-2888.48		down	86319	-3.40282e+38	-880.354		down	167714	-3.40282e+38	-1366.17		down	72733	-3.40282e+38	-3931.21		down	72733	-3.40282e+38	-4002.5		down
18691	-3.40282e+38	-1549.67		down	147935	-3.40282e+38	-1367.5		down	86172	-3.40282e+38	-880.354		down	74282	-3.40282e+38	-833.921		down	142006	-3.40282e+38	-1537.75		down	142006	-3.40282e+38	-1949.28		down
167714	-3.40282e+38	-1522.32		down	153563	-3.40282e+38	-1171.47		down	22171	-3.40282e+38	-798.292		down	147935	-3.40282e+38	-746.024		down	102298	-3.40282e+38	-1253.55		down	165069	-3.40282e+38	-1523.84		down
141870	-3.40282e+38	-1228.59		down	92053	-3.40282e+38	-1139.65		down	86171	-3.40282e+38	-739.855		down	134847	-3.40282e+38	-714.715		down	22171	-3.40282e+38	-1094.8		down	102298	-3.40282e+38	-1299.81		down
138388	-3.40282e+38	-978.579		down	138388	-3.40282e+38	-1094.36		down	86121	-3.40282e+38	-739.855		down	91390	-3.40282e+38	-646.508		down	22844	-3.40282e+38	-1018.67		down	22171	-3.40282e+38	-1132.58		down
153563	-3.40282e+38	-969.315		down	68434	-3.40282e+38	-988.382		down	144610	-3.40282e+38	-527.535		down	28384	-3.40282e+38	-642.991		down	86319	-3.40282e+38	-929.311		down	73732	-3.40282e+38	-1101.84		down
23750	-3.40282e+38	-872.437		down	74282	-3.40282e+38	-974.429		down	73732	-3.40282e+38	-520.667		down	139643	-3.40282e+38	-557.541		down	86172	-3.40282e+38	-929.311		down	22844	-3.40282e+38	-1100.54		down
23632	-3.40282e+38	-825.639		down	91390	-3.40282e+38	-952.199		down	17994	-3.40282e+38	-508.193		down	23042	-3.40282e+38	-478.918		down	140092	-3.40282e+38	-859.078		down	86319	-3.40282e+38	-994.931		down
24190	-3.40282e+38	-786.862		down	141746	-3.40282e+38	-933.162		down	102298	-3.40282e+38	-469.954		down	25706	-3.40282e+38	-467.303		down	82841	-3.40282e+38	-821.334		down	86172	-3.40282e+38	-994.931		down
22529	-3.40282e+38	-736.988		down	22529	-3.40282e+38	-774.402		down	82841	-3.40282e+38	-463.653		down	69648	-3.40282e+38	-431.088		down	22851	-3.40282e+38	-763.688		down	140092	-3.40282e+38	-940.65		down
68434	-3.40282e+38	-680.183		down	139643	-3.40282e+38	-764.791		down	137336	-3.40282e+38	-432.075		down	23960	-3.40282e+38	-390.754		down	137336	-3.40282e+38	-761.337		down	164484	-3.40282e+38	-931.005		down
145870	-3.40282e+38	-676.714		down	145952	-3.40282e+38	-729.221		down	139010	-3.40282e+38	-396.921		down	28055	-3.40282e+38	-388.962		down	139010	-3.40282e+38	-659.461		down	141124	-3.40282e+38	-868.353		down
141350	-3.40282e+38	-659.589		down	25706	-3.40282e+38	-716.493		down	22844	-3.40282e+38	-370.965		down	22036	-3.40282e+38	-386.737		down	134850	-3.40282e+38	-648.44		down	137336	-3.40282e+38	-829.528		down
107668	-3.40282e+38	-634.402		down	140055	-3.40282e+38	-658.19		down	134850	-3.40282e+38	-347.467		down	66180	-3.40282e+38	-377.584		down	86171	-3.40282e+38	-621.906		down	82841	-3.40282e+38	-825.318		down
141746	-3.40282e+38	-627.701		down	28106	-3.40282e+38	-658.19		down	139266	-3.40282e+38	-341.275		down	152622	-3.40282e+38	-375.974		down	86121	-3.40282e+38	-621.906		down	21787	-3.40282e+38	-794.863		down
147935	-3.40282e+38	-621.473		down	29355	-3.40282e+38	-654.728		down	64368	-3.40282e+38	-340.642		down	137037	-3.40282e+38	-374.587		down	144610	-3.40282e+38	-613.325		down	86171	-3.40282e+38	-780.623		down
136369	-3.40282e+38	-584.043		down	28384	-3.40282e+38	-628.563		down	107257	-3.40282e+38	-318.82		down	147973	-3.40282e+38	-354.09		down	143324	-3.40282e+38	-605.66		down	86121	-3.40282e+38	-780.623		down
138153	-3.40282e+38	-559.93		down	140704	-3.40282e+38	-625.218		down	136369	-3.40282e+38	-311.981		down	140055	-3.40282e+38	-338.666		down	125778	-3.40282e+38	-605.126		down	125778	-3.40282e+38	-762.847		down
136997	-3.40282e+38	-544.656		down	147973	-3.40282e+38	-618.838		down	147973	-3.40282e+38	-286.309		down	28106	-3.40282e+38	-338.666		down	17994	-3.40282e+38	-603.515		down	134850	-3.40282e+38	-707.624		down
140559	-3.40282e+38	-521.395		down	152622	-3.40282e+38	-616.824		down	28843	-3.40282e+38	-267.056		down	28870	-3.40282e+38	-330.427		down	107257	-3.40282e+38	-601.447		down	165208	-3.40282e+38	-675.558		down
28705	-3.40282e+38	-505.994		down	137036	-3.40282e+38	-612.352		down	24953	-3.40282e+38	-244.119		down	136975	-3.40282e+38	-327.056		down	21787	-3.40282e+38	-599.201		down	27937	-3.40282e+38	-663.504		down
23035	-3.40282e+38	-492.711		down	23960	-3.40282e+38	-594.09		down	25706	-3.40282e+38	-240.007		down	137036	-3.40282e+38	-319.709		down	73732	-3.40282e+38	-590.752		down	144610	-3.40282e+38	-639.817		down
61605	-3.40282e+38	-492.144		down	28870	-3.40282e+38	-592.867		down	23632	-3.40282e+38	-229.187		down	22675	-3.40282e+38	-313.726		down	27937	-3.40282e+38	-589.736		down	21871	-3.40282e+38	-634.247		down
28670	-3.40282e+38	-481.095		down	22036	-3.40282e+38	-590.397		down	140963	-3.40282e+38	-227.716		down	68434	-3.40282e+38	-308.199		down	135997	-3.40282e+38	-569.196		down	152037	-3.40282e+38	-633.199		down
140704	-3.40282e+38	-475.694		down	144582	-3.40282e+38	-553.82		down	135536	-3.40282e+38	-218.868		down	141746	-3.40282e+38	-305.461		down	22134	-3.40282e+38	-524.628		down	143324	-3.40282e+38	-628.544		down
138962	-3.40282e+38	-472.553		down	69648	-3.40282e+38	-549.155		down	140055	-3.40282e+38	-217.722		down	144582	-3.40282e+38	-304.095		down	134847	-3.40282e+38	-479.821		down	17994	-3.40282e+38	-616.605		down
145952	-3.40282e+38	-442.685		down	107668	-3.40282e+38	-547.916		down	28106	-3.40282e+38	-217.722		down	28955	-3.40282e+38	-300.639		down	28374	-3.40282e+38	-459.115		down	107257	-3.40282e+38	-615.677		down
139818	-3.40282e+38	-422.87		down	141350	-3.40282e+38	-524.076		down	138628	-3.40282e+38	-213.403		down	22851	-3.40282e+38	-295.633		down	28843	-3.40282e+38	-440.66		down	139010	-3.40282e+38	-584.025		down
90172	-3.40282e+38	-395.524		down	66180	-3.40282e+38	-512.55		down	77451	-3.40282e+38	-205.911		down	162904	-3.40282e+38	-290.269		down	164103	-3.40282e+38	-431.032		down	135997	-3.40282e+38	-583.789		down
23120	-3.40282e+38	-395.237		down	138153	-3.40282e+38	-509.515		down	111015	-3.40282e+38	-200.385		down	145952	-3.40282e+38	-286.536		down	165208	-3.40282e+38	-430.397		down	27437	-3.40282e+38	-550.203		down
29355	-3.40282e+38	-394.549		down	162904	-3.40282e+38	-486.335		down	119569	-3.40282e+38	-199.97		down	24880	-3.40282e+38	-273.055		down	106119	-3.40282e+38	-429.99		down	22134	-3.40282e+38	-548.073		down
145616	-3.40282e+38	-378.373		down	22675	-3.40282e+38	-474.694		down	67420	-3.40282e+38	-198.471		down	135556	-3.40282e+38	-267.532		down	139266	-3.40282e+38	-427.814		down	164103	-3.40282e+38	-541.903		down
29075	-3.40282e+38	-367.408		down	23042	-3.40282e+38	-459.007		down	27634	-3.40282e+38	-197.358		down	28640	-3.40282e+38	-260.236		down	140140	-3.40282e+38	-413.888		down	135061	-3.40282e+38	-539.937		down
138967	-3.40282e+38	-361.5		down	136997	-3.40282e+38	-457.978		down	23746	-3.40282e+38	-193.959		down	29355	-3.40282e+38	-260.179		down	25621	-3.40282e+38	-393.795		down	25621	-3.40282e+38	-490.062		down
141082	-3.40282e+38	-355.879		down	136975	-3.40282e+38	-450.846		down	166230	-3.40282e+38	-190.903		down	23309	-3.40282e+38	-260.139		down	28955	-3.40282e+38	-362.468		down	22851	-3.40282e+38	-468.056		down
124504	-3.40282e+38	-355.462		down	29587	-3.40282e+38	-443.627		down	167294	-3.40282e+38	-188.491		down	22487	-3.40282e+38	-249.162		down	135061	-3.40282e+38	-350.203		down	140140	-3.40282e+38	-467.047		down
88494	-3.40282e+38	-350.732		down	138967	-3.40282e+38	-421.04		down	141329	-3.40282e+38	-178.639		down	25452	-3.40282e+38	-240.103		down	135536	-3.40282e+38	-345.671		down	137753	-3.40282e+38	-464.639		down
24769	-3.40282e+38	-336.124		down	135556	-3.40282e+38	-420.671		down	106119	-3.40282e+38	-178.346		down	153563	-3.40282e+38	-202.155		down	137753	-3.40282e+38	-344.122		down	152448	-3.40282e+38	-454.76		down
140055	-3.40282e+38	-319.524		down	28055	-3.40282e+38	-418.543		down	76446	-3.40282e+38	-172.378		down	88063	-3.40282e+38	-202.033		down	24056	-3.40282e+38	-342.072		down	106119	-3.40282e+38	-451.855		down
28106	-3.40282e+38	-319.524		down	139739	-3.40282e+38	-409.873		down	92079	-3.40282e+38	-169.384		down	29587	-3.40282e+38	-201.539		down	142007	-3.40282e+38	-336.528		down	24056	-3.40282e+38	-444.708		down
23963	-3.40282e+38	-309.29		down	137037	-3.40282e+38	-404.419		down	28955	-3.40282e+38	-165.288		down	62570	-3.40282e+38	-198.355		down	27634	-3.40282e+38	-326.408		down	139266	-3.40282e+38	-438.174		down
91390	-3.40282e+38	-305.691		down	23309	-3.40282e+38	-391.636		down	22711	-3.40282e+38	-164.459		down	139739	-3.40282e+38	-195.508		down	25288	-3.40282e+38	-323.208		down	136006	-3.40282e+38	-419.977		down
23126	-3.40282e+38	-302.469		down	90597	-3.40282e+38	-385.441		down	23280	-3.40282e+38	-161.873		down	140376	-3.40282e+38	-195.341		down	26703	-3.40282e+38	-320.643		down	142007	-3.40282e+38	-418.46		down
140754	-3.40282e+38	-302.213		down	25452	-3.40282e+38	-378.205		down	25098	-3.40282e+38	-161.654		down	28888	-3.40282e+38	-188.746		down	136006	-3.40282e+38	-312.412		down	91509	-3.40282e+38	-414.405		down
135250	-3.40282e+38	-296.175		down	140754	-3.40282e+38	-373.484		down	141302	-3.40282e+38	-156.952		down	28843	-3.40282e+38	-183.531		down	106250	-3.40282e+38	-311.78		down	139923	-3.40282e+38	-405.957		down
137036	-3.40282e+38	-292.644		down	27737	-3.40282e+38	-348.679		down	25378	-3.40282e+38	-156.534		down	54377	-3.40282e+38	-179.321		down	155148	-3.40282e+38	-311.6		down	94573	-3.40282e+38	-398.97		down
157895	-3.40282e+38	-290.726		down	23247	-3.40282e+38	-343.193		down	94573	-3.40282e+38	-149.786		down	22398	-3.40282e+38	-178.856		down	25098	-3.40282e+38	-306.31		down	26703	-3.40282e+38	-382.364		down
135298	-3.40282e+38	-288.804		down	141082	-3.40282e+38	-340.387		down	22036	-3.40282e+38	-140.974		down	140859	-3.40282e+38	-176.959		down	25378	-3.40282e+38	-291.54		down	28374	-3.40282e+38	-381.364		down
90597	-3.40282e+38	-278.927		down	28640	-3.40282e+38	-339.408		down	139561	-3.40282e+38	-140.108		down	28782	-3.40282e+38	-175.249		down	27936	-3.40282e+38	-288.653		down	25098	-3.40282e+38	-380.793		down
135857	-3.40282e+38	-273.632		down	155400	-3.40282e+38	-335.919		down	139020	-3.40282e+38	-136.307		down	135469	-3.40282e+38	-171.76		down	26488	-3.40282e+38	-286.951		down	89691	-3.40282e+38	-362.716		down
138804	-3.40282e+38	-272.397		down	138962	-3.40282e+38	-335.786		down	109849	-3.40282e+38	-135.533		down	25288	-3.40282e+38	-168.227		down	22804	-3.40282e+38	-283.089		down	77508	-3.40282e+38	-360.61		down
76519	-3.40282e+38	-268.035		down	136864	-3.40282e+38	-334.329		down	24176	-3.40282e+38	-133.733		down	136394	-3.40282e+38	-158.924		down	127030	-3.40282e+38	-280.898		down	25378	-3.40282e+38	-358.011		down
147973	-3.40282e+38	-264.748		down	140032	-3.40282e+38	-333.289		down	152904	-3.40282e+38	-133.702		down	27737	-3.40282e+38	-155.949		down	101576	-3.40282e+38	-275.768		down	135536	-3.40282e+38	-357.939		down
28870	-3.40282e+38	-262.441		down	24880	-3.40282e+38	-325.361		down	74282	-3.40282e+38	-132.948		down	28913	-3.40282e+38	-153.966		down	77508	-3.40282e+38	-274.774		down	119569	-3.40282e+38	-346.419		down
23400	-3.40282e+38	-258.377		down	22711	-3.40282e+38	-319.658		down	22354	-3.40282e+38	-131.713		down	140704	-3.40282e+38	-149.525		down	26848	-3.40282e+38	-272.716		down	106250	-3.40282e+38	-340.387		down
77265	-3.40282e+38	-257.253		down	28888	-3.40282e+38	-311.848		down	26703	-3.40282e+38	-130.917		down	140323	-3.40282e+38	-147.922		down	137337	-3.40282e+38	-272.266		down	26848	-3.40282e+38	-334.349		down
23619	-3.40282e+38	-256.866		down	23126	-3.40282e+38	-310.002		down	25452	-2.92358e+38	-127.781	2.92358e+38	down	136685	-3.40282e+38	-143.568		down	119569	-3.40282e+38	-272.227		down	26301	-3.40282e+38	-320.405		down
23247	-3.40282e+38	-250.331		down	76519	-3.40282e+38	-309.262		down	91509	-9.44133e+37	-126.15	9.44133e+37	down	62619	-3.40282e+38	-141.819		down	135418	-3.40282e+38	-267.445		down	155148	-3.40282e+38	-317.957		down
144582	-3.40282e+38	-249.726		down	62570	-3.40282e+38	-307.492		down	25027	-5.99463e+37	-125.495	5.99463e+37	down	138024	-3.40282e+38	-139.154		down	152448	-3.40282e+38	-258.99		down	161882	-3.40282e+38	-314.683		down
25706	-3.40282e+38	-249.19		down	28429	-3.40282e+38	-305.826		down	167714	-5.04081e+37	-125.245	5.04081e+37	down	136864	-3.40282e+38	-137.747		down	136512	-3.40282e+38	-257.42		down	135418	-3.40282e+38	-311.595		down
24360	-3.40282e+38	-243.847		down	24430	-3.40282e+38	-302.467		down	24495	-4.93107e+36	-121.891	4.93107e+36	down	147788	-3.40282e+38	-137.345		down	26301	-3.40282e+38	-254.86		down	114522	-3.40282e+38	-310.527		down
29587	-3.40282e+38	-242.088		down	88494	-3.40282e+38	-299.526		down	167046	-1.70123e+36	-120.356	1.70123e+36	down	155400	-3.40282e+38	-133.195		down	25027	-3.40282e+38	-254.619		down	136512	-3.40282e+38	-309.409		down
152622	-3.40282e+38	-240.85		down	90172	-3.40282e+38	-299.003		down	29361	-1.07097e+36	-119.688	1.07097e+36	down	136915	-3.40282e+38	-131.185		down	109849	-3.40282e+38	-254.609		down	26041	-3.40282e+38	-299.731		down
150734	-3.40282e+38	-236.915		down	22487	-3.40282e+38	-296.301		down	25645	-6.08471e+35	-118.873	6.08471e+35	down	23280	-3.40282e+38	-130.475		down	21871	-3.40282e+38	-250.224		down	101576	-3.40282e+38	-299.638		down
140032	-3.40282e+38	-230.588		down	147788	-3.40282e+38	-295.923		down	22855	-4.33747e+35	-118.384	4.33747e+35	down	22711	-3.40282e+38	-129.343		down	161882	-3.40282e+38	-247.419		down	140963	-3.40282e+38	-299.495		down
99308	-3.40282e+38	-228.16		down	77265	-3.40282e+38	-289.415		down	26301	-2.90969e+35	-117.808	2.90969e+35	down	87783	-2.81424e+38	-127.726	2.81424e+38	down	64368	-3.40282e+38	-243.478		down	127030	-3.40282e+38	-298.001		down
110561	-3.40282e+38	-227.791		down	135857	-3.40282e+38	-289.378		down	136685	-1.10945e+35	-116.417	1.10945e+35	down	26237	-2.48352e+38	-127.546	2.48352e+38	down	114522	-3.40282e+38	-243.078		down	27936	-3.40282e+38	-295.174		down
23195	-3.40282e+38	-227.372		down	54377	-3.40282e+38	-278.921		down	24330	-2.97891e+34	-114.52	2.97891e+34	down	24777	-1.3492e+38	-126.665	1.3492e+38	down	140963	-3.40282e+38	-242.352		down	27321	-3.40282e+38	-293.807		down
89537	-3.40282e+38	-226.308		down	28670	-3.40282e+38	-272.66		down	137337	-1.11767e+34	-113.106	1.11767e+34	down	86675	-2.26836e+37	-124.093	2.26836e+37	down	25168	-3.40282e+38	-236.699		down	27933	-3.40282e+38	-293.656		down
27002	-3.40282e+38	-224.497		down	135469	-3.40282e+38	-272.636		down	137037	-1.06868e+34	-113.041	1.06868e+34	down	164507	-1.20046e+37	-123.175	1.20046e+37	down	27321	-3.40282e+38	-234.467		down	24698	-3.40282e+38	-291.785		down
141084	-3.40282e+38	-218.293		down	150734	-3.40282e+38	-272.455		down	24664	-1.49005e+33	-110.199	1.49005e+33	down	138136	-7.228e+36	-122.443	7.228e+36	down	139923	-3.40282e+38	-233.887		down	24959	-3.40282e+38	-291.166		down
24430	-3.40282e+38	-217.921		down	24360	-3.40282e+38	-271.904		down	135651	-7.52271e+32	-109.213	7.52271e+32	down	136625	-3.89485e+36	-121.551	3.89485e+36	down	17250	-3.40282e+38	-231.749		down	137337	-3.40282e+38	-286.531		down
139739	-3.40282e+38	-214.365		down	145870	-3.40282e+38	-266.211		down	110561	-2.0849e+32	-107.362	2.0849e+32	down	139559	-6.20531e+35	-118.901	6.20531e+35	down	139561	-3.40282e+38	-225.585		down	139984	-3.40282e+38	-286.065		down
136110	-3.40282e+38	-213.82		down	25771	-3.40282e+38	-265.79		down	26576	-6.86331e+31	-105.759	6.86331e+31	down	159766	-4.25118e+35	-118.355	4.25118e+35	down	94573	-3.40282e+38	-223.183		down	25027	-3.40282e+38	-274.307		down
28429	-3.40282e+38	-213.615		down	26561	-3.40282e+38	-265.714		down	155564	-3.91927e+31	-104.95	3.91927e+31	down	25771	-8.23106e+34	-115.987	8.23106e+34	down	121983	-3.40282e+38	-222.313		down	27634	-3.40282e+38	-272.978		down
28650	-3.40282e+38	-212.851		down	139559	-3.40282e+38	-265.101		down	166107	-6.04532e+30	-102.254	6.04532e+30	down	138388	-7.1437e+34	-115.782	7.1437e+34	down	29121	-3.40282e+38	-221.953		down	139561	-3.40282e+38	-268.375		down
27735	-3.40282e+38	-211.304		down	137148	-3.40282e+38	-260.652		down	116093	-3.78898e+30	-101.58	3.78898e+30	down	153117	-2.33184e+34	-114.167	2.33184e+34	down	167294	-3.40282e+38	-220.79		down	139234	-3.40282e+38	-266.985		down
29239	-3.40282e+38	-210.139		down	89537	-3.40282e+38	-260.45		down	28782	-3.6599e+30	-101.53	3.6599e+30	down	137339	-2.29283e+34	-114.143	2.29283e+34	down	24731	-3.40282e+38	-220.135		down	25033	-3.40282e+38	-266.774		down
138961	-3.40282e+38	-209.588		down	140859	-3.40282e+38	-258.238		down	25349	-3.51008e+30	-101.469	3.51008e+30	down	128879	-4.55682e+33	-111.812	4.55682e+33	down	26263	-3.40282e+38	-219.57		down	22508	-3.40282e+38	-263.895		down
139643	-3.40282e+38	-207.25		down	63283	-3.40282e+38	-257.816		down	24880	-2.38362e+30	-100.911	2.38362e+30	down	22199	-2.39229e+33	-110.882	2.39229e+33	down	167046	-3.40282e+38	-219.53		down	17250	-3.40282e+38	-262.198		down
140627	-3.40282e+38	-206.726		down	22234	-3.40282e+38	-252.797		down	143324	-1.5986e+30	-100.335	1.5986e+30	down	29295	-2.1318e+33	-110.716	2.1318e+33	down	27933	-3.40282e+38	-219.034		down	28843	-3.40282e+38	-257.129		down
27179	-3.40282e+38	-205.472		down	22897	-3.40282e+38	-247.796		down	21871	-4.36431e+29	-98.4617	4.36431e+29	down	28288	-6.82246e+32	-109.072	6.82246e+32	down	139984	-3.40282e+38	-217.794		down	109849	-3.40282e+38	-256.427		down
137148	-3.40282e+38	-203.783		down	135704	-3.40282e+38	-242.755		down	139318	-3.07255e+29	-97.9553	3.07255e+29	down	138628	-5.53645e+32	-108.771	5.53645e+32	down	22199	-3.40282e+38	-216.638		down	135683	-3.40282e+38	-254.218		down
22036	-3.40282e+38	-203.66		down	88715	-3.40282e+38	-237.537		down	147566	-1.76309e+29	-97.154	1.76309e+29	down	90597	-1.15906e+32	-106.515	1.15906e+32	down	23928	-3.40282e+38	-211.649		down	26263	-3.40282e+38	-252.621		down
23960	-3.40282e+38	-203.336		down	145616	-3.40282e+38	-235.301		down	85518	-1.62231e+29	-97.034	1.62231e+29	down	140631	-4.35566e+31	-105.103	4.35566e+31	down	140091	-3.40282e+38	-205.541		down	167046	-3.40282e+38	-246.547		down
155400	-3.40282e+38	-202.724		down	24551	-3.40282e+38	-233.285		down	24959	-1.57291e+29	-96.9894	1.57291e+29	down	27892	-2.63587e+31	-104.378	2.63587e+31	down	141307	-3.40282e+38	-204.939		down	17517	-3.40282e+38	-245.381		down
108212	-3.40282e+38	-202.6		down	127063	-3.40282e+38	-232.122		down	28870	-1.32968e+29	-96.747	1.32968e+29	down	22897	-1.03624e+31	-103.031	1.03624e+31	down	91509	-3.40282e+38	-204.736		down	25168	-3.40282e+38	-242.859		down
136864	-3.40282e+38	-196.582		down	87751	-3.40282e+38	-228.82		down	140092	-8.68975e+28	-96.1333	8.68975e+28	down	23190	-9.91634e+30	-102.968	9.91634e+30	down	24959	-3.40282e+38	-203.785		down	155342	-3.40282e+38	-241.995		down
162904	-3.40282e+38	-196.066		down	138804	-3.40282e+38	-227.124		down	99035	-6.21182e+28	-95.649	6.21182e+28	down	140032	-8.24112e+30	-102.701	8.24112e+30	down	26237	-3.40282e+38	-203.594		down	137392	-3.40282e+38	-239.421		down
136342	-3.40282e+38	-195.251		down	27002	-3.40282e+38	-225.391		down	88494	-6.003e+28	-95.5997	6.003e+28	down	22518	-2.76409e+30	-101.125	2.76409e+30	down	139318	-3.40282e+38	-202.496		down	109665	-3.40282e+38	-239.245		down
27737	-3.40282e+38	-192.73		down	167382	-3.40282e+38	-224.993		down	155148	-2.68275e+28	-94.4377	2.68275e+28	down	167382	-1.71692e+30	-100.438	1.71692e+30	down	24808	-3.40282e+38	-201.674		down	22804	-3.40282e+38	-238.17		down
140906	-3.40282e+38	-192.585		down	156458	-3.40282e+38	-224.211		down	138526	-1.68568e+28	-93.7673	1.68568e+28	down	136250	-1.31447e+30	-100.052	1.31447e+30	down	92079	-3.40282e+38	-196.881		down	92079	-3.40282e+38	-237.643		down
22711	-3.40282e+38	-190.314		down	28288	-3.40282e+38	-221.196		down	25338	-1.33022e+28	-93.4257	1.33022e+28	down	25340	-7.08991e+29	-99.1617	7.08991e+29	down	27906	-3.40282e+38	-193.998		down	140316	-3.40282e+38	-237.21		down
63283	-3.40282e+38	-189.915		down	139818	-3.40282e+38	-221.14		down	75851	-4.85319e+27	-91.971	4.85319e+27	down	26488	-2.11606e+29	-97.4173	2.11606e+29	down	67420	-3.40282e+38	-193.916		down	141307	-3.40282e+38	-236.958		down
166137	-3.40282e+38	-189.612		down	135569	-3.40282e+38	-217.038		down	139015	-3.39074e+27	-91.4537	3.39074e+27	down	29289	-1.90363e+29	-97.2647	1.90363e+29	down	76446	-3.40282e+38	-191.877		down	145826	-3.40282e+38	-235.081		down
26561	-3.40282e+38	-188.647		down	140559	-3.40282e+38	-214.474		down	163584	-2.28989e+27	-90.8873	2.28989e+27	down	69591	-1.77081e+29	-97.1603	1.77081e+29	down	28252	-3.40282e+38	-190.626		down	77451	-3.40282e+38	-235.015		down
137917	-3.40282e+38	-188.479		down	28524	-3.40282e+38	-214.129		down	140757	-2.1976e+27	-90.828	2.1976e+27	down	138185	-1.52666e+29	-96.9463	1.52666e+29	down	23310	-3.40282e+38	-187.645		down	135212	-3.40282e+38	-232.912		down
135704	-3.40282e+38	-188		down	130627	-3.40282e+38	-212.638		down	135469	-1.07691e+27	-89.799	1.07691e+27	down	22163	-7.21346e+28	-95.8647	7.21346e+28	down	135165	-3.40282e+38	-186.953		down	64368	-3.40282e+38	-232.613		down
23044	-3.40282e+38	-187.646		down	26027	-3.40282e+38	-212.354		down	139417	-1.04725e+27	-89.7587	1.04725e+27	down	21673	-5.06196e+28	-95.3537	5.06196e+28	down	29361	-3.40282e+38	-185.79		down	139417	-3.40282e+38	-225.948		down
130627	-3.40282e+38	-185.739		down	136394	-3.40282e+38	-210.236		down	90431	-8.58526e+26	-89.472	8.58526e+26	down	140197	-2.11112e+28	-94.092	2.11112e+28	down	145826	-3.40282e+38	-185.221		down	140091	-3.40282e+38	-220.126		down
140756	-3.40282e+38	-183.526		down	24190	-3.40282e+38	-210.191		down	137876	-8.19181e+26	-89.4043	8.19181e+26	down	146011	-1.88384e+28	-93.9277	1.88384e+28	down	23087	-3.40282e+38	-185.092		down	24673	-3.40282e+38	-219.569		down
146859	-3.40282e+38	-183.305		down	22132	-3.40282e+38	-209.213		down	23310	-7.3286e+26	-89.2437	7.3286e+26	down	27189	-1.62905e+28	-93.718	1.62905e+28	down	165246	-3.40282e+38	-184.305		down	77095	-3.40282e+38	-216.92		down
115001	-3.40282e+38	-182.639		down	140323	-3.40282e+38	-208.188		down	141280	-4.62634e+26	-88.58	4.62634e+26	down	23247	-8.99781e+27	-92.8616	8.99781e+27	down	136563	-3.40282e+38	-184.151		down	139318	-3.40282e+38	-214.936		down
141376	-3.40282e+38	-181.285		down	29509	-3.40282e+38	-207.6		down	150959	-3.32845e+26	-88.105	3.32845e+26	down	140507	-8.74788e+27	-92.821	8.74788e+27	down	25033	-3.40282e+38	-183.764		down	72414	-3.40282e+38	-209.58		down
22132	-3.40282e+38	-180.942		down	22398	-3.40282e+38	-206.467		down	137932	-2.27395e+26	-87.5553	2.27395e+26	down	28429	-5.73282e+27	-92.2113	5.73282e+27	down	111015	-3.40282e+38	-183.584		down	116093	-3.40282e+38	-208.238		down
108725	-3.40282e+38	-178.932		down	24207	-3.40282e+38	-206.262		down	104457	-3.53603e+25	-84.8703	3.53603e+25	down	150219	-4.86555e+27	-91.9747	4.86555e+27	down	40810	-3.40282e+38	-183.087		down	23669	-3.40282e+38	-206.404		down
143869	-3.40282e+38	-178.483		down	141084	-3.40282e+38	-205.23		down	24360	-3.1663e+25	-84.711	3.1663e+25	down	23028	-2.39708e+27	-90.9533	2.39708e+27	down	147566	-3.40282e+38	-182.88		down	25349	-3.40282e+38	-204.796		down
81600	-3.40282e+38	-178.289		down	23280	-3.40282e+38	-204.832		down	136563	-3.04504e+25	-84.6547	3.04504e+25	down	25489	-2.37829e+27	-90.942	2.37829e+27	down	150399	-3.40282e+38	-181.366		down	23310	-3.40282e+38	-202.259		down
127063	-3.40282e+38	-177.576		down	139120	-3.40282e+38	-204.077		down	64606	-2.55584e+25	-84.402	2.55584e+25	down	24643	-1.71784e+27	-90.4727	1.71784e+27	down	24953	-3.40282e+38	-181.174		down	67420	-3.40282e+38	-201.731		down
86811	-3.40282e+38	-174.964		down	145376	-3.40282e+38	-202.583		down	23631	-1.16593e+25	-83.2697	1.16593e+25	down	156458	-1.01628e+27	-89.7154	1.01628e+27	down	24673	-3.40282e+38	-181.093		down	138692	-3.40282e+38	-201.53		down
28524	-3.40282e+38	-174.134		down	23044	-3.40282e+38	-201.92		down	54377	-5.53546e+24	-82.195	5.53546e+24	down	135569	-1.01133e+27	-89.7083	1.01133e+27	down	141329	-3.40282e+38	-177.256		down	24808	-3.40282e+38	-199.178		down
21811	-3.40282e+38	-173.711		down	41852	-3.40282e+38	-199.315		down	138692	-4.98775e+24	-82.0447	4.98775e+24	down	136178	-9.03084e+26	-89.545	9.03084e+26	down	72414	-3.40282e+38	-174.18		down	166519	-3.40282e+38	-196.247		down
29489	-3.40282e+38	-172.448		down	28334	-3.40282e+38	-198.59		down	28888	-4.04107e+24	-81.741	4.04107e+24	down	152931	-7.09033e+26	-89.196	7.09033e+26	down	139466	-3.40282e+38	-167.68		down	23928	-3.40282e+38	-196.016		down
28334	-3.40282e+38	-171.789		down	151621	-3.40282e+38	-197.741		down	83524	-3.36689e+24	-81.4777	3.36689e+24	down	72573	-8.40177e+25	-86.1189	8.40177e+25	down	137392	-3.40282e+38	-166.759		down	121983	-3.40282e+38	-194.432		down
22234	-3.40282e+38	-170.049		down	86811	-3.40282e+38	-197.046		down	135418	-3.31131e+24	-81.4537	3.31131e+24	down	28904	-5.77626e+25	-85.5783	5.77626e+25	down	74100	-3.40282e+38	-165.119		down	76446	-3.40282e+38	-193.243		down
141302	-3.40282e+38	-169.167		down	23400	-3.40282e+38	-196.821		down	146470	-3.10671e+24	-81.3617	3.10671e+24	down	27626	-4.3827e+25	-85.18	4.3827e+25	down	24176	-3.40282e+38	-162.707		down	141329	-3.40282e+38	-192.803		down
139120	-3.40282e+38	-168.117		down	24486	-3.40282e+38	-196.172		down	28303	-8.56614e+23	-79.503	8.56614e+23	down	24430	-2.82367e+25	-84.5458	2.82367e+25	down	167825	-3.40282e+38	-161.646		down	111015	-3.40282e+38	-192.59		down
22189	-3.40282e+38	-168.056		down	86675	-3.40282e+38	-193.969		down	166081	-4.02499e+23	-78.4133	4.02499e+23	down	26925	-2.02531e+25	-84.0663	2.02531e+25	down	135538	-3.40282e+38	-160.666		down	147566	-3.40282e+38	-191.071		down
143263	-3.40282e+38	-167.983		down	88063	-3.40282e+38	-192.943		down	21673	-7.47938e+22	-75.9853	7.47938e+22	down	88715	-1.60083e+25	-83.727	1.60083e+25	down	77095	-3.40282e+38	-159.367		down	136369	-3.40282e+38	-189.95		down
28397	-3.40282e+38	-167.524		down	167613	-3.40282e+38	-191.676		down	22851	-5.77135e+22	-75.6113	5.77135e+22	down	26027	-1.37715e+25	-83.5099	1.37715e+25	down	23669	-3.40282e+38	-159.196		down	26488	-3.40282e+38	-189.534		down
41852	-3.40282e+38	-166.248		down	23120	-3.40282e+38	-191.316		down	140654	-4.23565e+22	-75.165	4.23565e+22	down	139133	-1.2688e+25	-83.3917	1.2688e+25	down	25280	-3.40282e+38	-158.081		down	136563	-3.40282e+38	-186.459		down
24493	-3.40282e+38	-164.37		down	153117	-3.40282e+38	-188.089		down	140859	-3.98045e+22	-75.0754	3.98045e+22	down	22234	-8.12165e+24	-82.7481	8.12165e+24	down	137876	-3.40282e+38	-157.727		down	40810	-3.40282e+38	-186.08		down
21841	-3.40282e+38	-164.17		down	28904	-3.40282e+38	-187.371		down	140091	-3.90931e+22	-75.0493	3.90931e+22	down	29121	-7.88282e+24	-82.705	7.88282e+24	down	90431	-3.40282e+38	-151.507		down	29361	-3.40282e+38	-185.749		down
87751	-3.40282e+38	-163.73		down	140376	-3.40282e+38	-182.993		down	125019	-3.89668e+22	-75.0447	3.89668e+22	down	22332	-5.46189e+24	-82.1757	5.46189e+24	down	24730	-3.40282e+38	-151.071		down	24731	-3.40282e+38	-181.801		down
25474	-3.40282e+38	-163.61		down	159766	-3.40282e+38	-181.181		down	125778	-3.09497e+22	-74.7123	3.09497e+22	down	108004	-4.04009e+24	-81.7407	4.04009e+24	down	26105	-3.40282e+38	-150.513		down	27195	-3.40282e+38	-181.285		down
69091	-3.40282e+38	-162.72		down	25474	-3.40282e+38	-180.037		down	149294	-2.29939e+22	-74.2837	2.29939e+22	down	22483	-3.22162e+24	-81.4141	3.22162e+24	down	25338	-3.40282e+38	-150.337		down	136700	-3.40282e+38	-181.084		down
22675	-3.40282e+38	-160.968		down	28518	-3.40282e+38	-179.088		down	136693	-2.15977e+22	-74.1933	2.15977e+22	down	19493	-1.55587e+24	-80.364	1.55587e+24	down	25905	-3.40282e+38	-149.856		down	23966	-3.40282e+38	-180.998		down
62170	-3.40282e+38	-159.576		down	26925	-3.40282e+38	-179.016		down	163632	-1.82545e+22	-73.9507	1.82545e+22	down	24551	-1.35006e+24	-80.1593	1.35006e+24	down	75851	-3.40282e+38	-148.718		down	167825	-3.40282e+38	-177.824		down
22155	-3.40282e+38	-159.293		down	138628	-3.40282e+38	-178.558		down	77095	-9.40118e+21	-72.9933	9.40118e+21	down	136877	-9.76978e+23	-79.6927	9.76978e+23	down	26041	-3.40282e+38	-148.614		down	125019	-3.40282e+38	-177.333		down
98608	-3.40282e+38	-158.726		down	23746	-3.40282e+38	-175.434		down	137392	-6.24417e+21	-72.403	6.24417e+21	down	25778	-9.14088e+23	-79.5967	9.14088e+23	down	135419	-3.40282e+38	-146.769		down	135097	-3.40282e+38	-176.304		down
151621	-3.40282e+38	-158.685		down	151292	-3.40282e+38	-174.531		down	26041	-5.04391e+21	-72.095	5.04391e+21	down	22657	-6.96275e+23	-79.204	6.96275e+23	down	135683	-3.40282e+38	-146.377		down	24176	-3.40282e+38	-176.092		down
147788	-3.40282e+38	-158.577		down	27179	-3.40282e+38	-174.288		down	71325	-2.22196e+21	-70.9123	2.22196e+21	down	155564	-6.15026e+23	-79.025	6.15026e+23	down	31035	-3.40282e+38	-144.259		down	160952	-3.40282e+38	-176.073		down
156961	-3.40282e+38	-157.946		down	22125	-3.40282e+38	-173.52		down	128405	-2.07221e+21	-70.8117	2.07221e+21	down	138434	-5.04315e+23	-78.7387	5.04315e+23	down	138628	-3.40282e+38	-143.615		down	136266	-3.40282e+38	-170.461		down
28518	-3.40282e+38	-156.108		down	25489	-3.40282e+38	-173.503		down	21655	-1.2967e+21	-70.1353	1.2967e+21	down	108584	-3.56853e+23	-78.2397	3.56853e+23	down	17498	-3.40282e+38	-142.278		down	139466	-3.40282e+38	-169.357		down
23631	-3.40282e+38	-155.361		down	115001	-3.40282e+38	-173.157		down	138633	-1.03228e+21	-69.8063	1.03228e+21	down	28374	-2.54317e+23	-77.751	2.54317e+23	down	25349	-3.40282e+38	-141.462		down	23632	-3.40282e+38	-166.737		down
145376	-3.40282e+38	-154.538		down	155844	-3.40282e+38	-171.823		down	135538	-8.81178e+20	-69.578	8.81178e+20	down	26105	-2.37183e+23	-77.6503	2.37183e+23	down	166519	-3.40282e+38	-141.407		down	135538	-3.40282e+38	-166.245		down
26308	-3.40282e+38	-154.016		down	62170	-3.40282e+38	-171.112		down	163340	-4.83361e+20	-68.7117	4.83361e+20	down	26561	-1.58254e+23	-77.0666	1.58254e+23	down	160952	-3.40282e+38	-140.894		down	135165	-3.40282e+38	-162.993		down
88715	-3.40282e+38	-153.81		down	143263	-3.40282e+38	-171.035		down	136512	-4.53383e+20	-68.6193	4.53383e+20	down	140760	-1.03862e+23	-76.459	1.03862e+23	down	166107	-3.40282e+38	-139.908		down	121871	-3.40282e+38	-162.01		down
22303	-3.40282e+38	-153.281		down	135253	-3.40282e+38	-170.557		down	29607	-4.50575e+20	-68.6103	4.50575e+20	down	141204	-8.93781e+22	-76.2423	8.93781e+22	down	116093	-3.40282e+38	-137.901		down	31035	-3.40282e+38	-158.901		down
135556	-3.40282e+38	-153.139		down	157895	-3.40282e+38	-169.722		down	140564	-3.23575e+20	-68.1327	3.23575e+20	down	29297	-8.10001e+22	-76.1003	8.10001e+22	down	164113	-3.40282e+38	-136.906		down	24864	-3.40282e+38	-157.383		down
24551	-3.40282e+38	-153.126		down	87783	-3.40282e+38	-168.333		down	121983	-2.88152e+20	-67.9654	2.88152e+20	down	23149	-7.43434e+22	-75.9766	7.43434e+22	down	24864	-3.40282e+38	-136.51		down	165246	-3.40282e+38	-155.594		down
151292	-3.40282e+38	-151.843		down	136625	-3.40282e+38	-167.746		down	22675	-2.69099e+20	-67.8667	2.69099e+20	down	22476	-7.35776e+22	-75.9617	7.35776e+22	down	138633	-3.40282e+38	-136.183		down	137876	-3.40282e+38	-155.278		down
28089	-3.40282e+38	-149.995		down	27189	-3.40282e+38	-167.348		down	149405	-1.59782e+20	-67.1147	1.59782e+20	down	135083	-6.68014e+22	-75.8223	6.68014e+22	down	152904	-3.40282e+38	-135.973		down	25288	-3.40282e+38	-154.981		down
25771	-3.40282e+38	-149.803		down	138136	-3.40282e+38	-166.954		down	141376	-7.59654e+19	-66.042	7.59654e+19	down	139010	-5.1132e+22	-75.4366	5.1132e+22	down	166230	-3.40282e+38	-134.668		down	135419	-3.40282e+38	-154.879		down
23102	-3.40282e+38	-146.791		down	29295	-3.40282e+38	-166.425		down	62619	-7.25857e+19	-65.9763	7.25857e+19	down	167294	-4.84199e+22	-75.358	4.84199e+22	down	128405	-3.40282e+38	-133.127		down	90431	-3.40282e+38	-154.426		down
139559	-3.40282e+38	-146.2		down	26308	-3.40282e+38	-166.222		down	28670	-7.14711e+19	-65.954	7.14711e+19	down	21720	-3.08208e+22	-74.7063	3.08208e+22	down	79396	-3.40282e+38	-131.49		down	121018	-3.40282e+38	-153.287		down
140703	-3.40282e+38	-145.19		down	26082	-3.40282e+38	-165.345		down	121871	-6.92119e+19	-65.9077	6.92119e+19	down	99230	-2.87386e+22	-74.6054	2.87386e+22	down	163340	-3.40282e+38	-131.03		down	138633	-3.40282e+38	-153.146		down
23746	-3.40282e+38	-144.814		down	135083	-3.40282e+38	-164.805		down	136911	-5.55337e+19	-65.59	5.55337e+19	down	29294	-1.21837e+22	-73.3674	1.21837e+22	down	136266	-3.40282e+38	-129.871		down	75851	-3.40282e+38	-150.877		down
22897	-3.40282e+38	-144.765		down	137917	-3.40282e+38	-164.491		down	22575	-5.51503e+19	-65.58	5.51503e+19	down	160064	-6.6831e+21	-72.501	6.6831e+21	down	104840	-1.32538e+38	-126.64	1.32538e+38	down	25280	-3.40282e+38	-150.864		down
23381	-3.40282e+38	-144.403		down	140627	-3.40282e+38	-164.338		down	22977	-4.64188e+19	-65.3313	4.64188e+19	down	23609	-5.51046e+21	-72.2227	5.51046e+21	down	24593	-7.61006e+36	-122.517	7.61006e+36	down	25443	-3.40282e+38	-150.784		down
24814	-3.40282e+38	-144.371		down	136915	-3.40282e+38	-164.125		down	24593	-3.51627e+19	-64.9307	3.51627e+19	down	140754	-2.84898e+21	-71.2709	2.84898e+21	down	26576	-6.0399e+35	-118.862	6.0399e+35	down	17498	-3.40282e+38	-150.171		down
152952	-3.40282e+38	-144.254		down	22155	-3.40282e+38	-162.793		down	29587	-2.90256e+19	-64.654	2.90256e+19	down	89677	-1.9152e+21	-70.698	1.9152e+21	down	28782	-3.30009e+35	-117.99	3.30009e+35	down	24953	-3.40282e+38	-148.148		down
23103	-3.40282e+38	-144.089		down	23631	-3.40282e+38	-162.167		down	88063	-2.35509e+19	-64.3524	2.35509e+19	down	23087	-1.30422e+21	-70.1437	1.30422e+21	down	141205	-9.05748e+34	-116.125	9.05748e+34	down	27906	-3.40282e+38	-147.594		down
29509	-3.40282e+38	-144.058		down	140703	-3.40282e+38	-161.595		down	165208	-1.91911e+19	-64.0571	1.91911e+19	down	24207	-7.15053e+20	-69.2766	7.15053e+20	down	141280	-5.02727e+34	-115.275	5.02727e+34	down	166230	-3.40282e+38	-147.007		down
132098	-3.40282e+38	-143.931		down	141376	-3.40282e+38	-160.794		down	23821	-8.76825e+18	-62.927	8.76825e+18	down	17825	-3.96348e+20	-68.4253	3.96348e+20	down	89075	-2.73292e+34	-114.396	2.73292e+34	down	25493	-3.40282e+38	-146.846		down
141137	-3.40282e+38	-141.116		down	140507	-3.40282e+38	-160.545		down	62170	-8.58368e+18	-62.8963	8.58368e+18	down	136780	-3.78889e+20	-68.3603	3.78889e+20	down	166081	-1.32358e+34	-113.35	1.32358e+34	down	167294	-3.40282e+38	-145.432		down
140015	-3.40282e+38	-140.801		down	28913	-3.40282e+38	-159.622		down	139466	-4.10284e+18	-61.8313	4.10284e+18	down	63283	-2.75516e+20	-67.9007	2.75516e+20	down	16887	-1.3108e+34	-113.336	1.3108e+34	down	25338	-3.40282e+38	-144.626		down
74282	-3.40282e+38	-140.508		down	28782	-3.40282e+38	-158.789		down	104840	-2.67889e+18	-61.2163	2.67889e+18	down	21657	-2.22907e+20	-67.595	2.22907e+20	down	24771	-6.24658e+33	-112.267	6.24658e+33	down	164113	-3.40282e+38	-144.443		down
163255	-3.40282e+38	-139.057		down	22114	-3.40282e+38	-157.064		down	28781	-7.2044e+17	-59.3217	7.2044e+17	down	66747	-2.18218e+20	-67.5643	2.18218e+20	down	136700	-4.87711e+33	-111.91	4.87711e+33	down	28252	-3.40282e+38	-141.529		down
25452	-3.40282e+38	-138.102		down	136685	-3.40282e+38	-156.583		down	26105	-5.17268e+17	-58.8437	5.17268e+17	down	24923	-2.16764e+20	-67.5547	2.16764e+20	down	163584	-1.26755e+33	-109.966	1.26755e+33	down	166107	-3.40282e+38	-141.521		down
121018	-3.40282e+38	-137.243		down	21673	-3.40282e+38	-156.316		down	25905	-2.76806e+17	-57.9417	2.76806e+17	down	22732	-1.87791e+20	-67.3477	1.87791e+20	down	136529	-4.27312e+32	-108.397	4.27312e+32	down	167014	-3.40282e+38	-140.623		down
24436	-3.40282e+38	-137.228		down	23035	-3.40282e+38	-155.776		down	157228	-2.14933e+17	-57.5767	2.14933e+17	down	133337	-1.57183e+20	-67.091	1.57183e+20	down	138692	-2.73326e+32	-107.752	2.73326e+32	down	150224	-3.40282e+38	-139.895		down
24207	-3.40282e+38	-136.985		down	137339	-3.40282e+38	-155.739		down	28063	-1.74535e+17	-57.2763	1.74535e+17	down	22482	-5.78918e+19	-65.65	5.78918e+19	down	22508	-2.6833e+32	-107.726	2.6833e+32	down	128405	-3.40282e+38	-139.584		down
155146	-3.40282e+38	-136.557		down	150219	-3.40282e+38	-155.564		down	25914	-1.51036e+17	-57.0677	1.51036e+17	down	73689	-4.35108e+19	-65.238	4.35108e+19	down	155342	-2.5942e+32	-107.677	2.5942e+32	down	29121	-3.40282e+38	-139.248		down
22125	-3.40282e+38	-136.448		down	136250	-3.40282e+38	-153.807		down	72414	-1.45383e+17	-57.0126	1.45383e+17	down	139278	-3.93139e+19	-65.0917	3.93139e+19	down	63812	-2.22575e+32	-107.456	2.22575e+32	down	152904	-3.40282e+38	-138.006		down
26527	-3.40282e+38	-136.045		down	23149	-3.40282e+38	-152.229		down	23755	-1.35431e+17	-56.9103	1.35431e+17	down	87751	-3.92508e+19	-65.0894	3.92508e+19	down	26286	-2.07143e+32	-107.352	2.07143e+32	down	26576	-3.40282e+38	-137.178		down
66180	-3.40282e+38	-134.966		down	135575	-3.40282e+38	-152.194		down	164113	-1.02283e+17	-56.5053	1.02283e+17	down	167613	-3.4855e+19	-64.918	3.4855e+19	down	138024	-1.60584e+32	-106.985	1.60584e+32	down	24785	-3.40282e+38	-133.645		down
24486	-3.40282e+38	-134.711		down	135250	-3.40282e+38	-151.444		down	99230	-5.02279e+16	-55.4793	5.02279e+16	down	138377	-3.27319e+19	-64.8273	3.27319e+19	down	104457	-8.78208e+31	-106.114	8.78208e+31	down	74100	-3.40282e+38	-132.801		down
156458	-3.40282e+38	-134.495		down	24493	-3.40282e+38	-150.84		down	17498	-4.62726e+16	-55.361	4.62726e+16	down	149131	-2.41894e+19	-64.391	2.41894e+19	down	137575	-5.25933e+31	-105.375	5.25933e+31	down	24593	-3.40282e+38	-131.447		down
22288	-3.40282e+38	-134.334		down	139278	-3.40282e+38	-150.502		down	22518	-4.46552e+16	-55.3097	4.46552e+16	down	22003	-2.30329e+19	-64.3203	2.30329e+19	down	139522	-3.41345e+31	-104.751	3.41345e+31	down	26286	-3.40282e+38	-131.123		down
22001	-3.40282e+38	-132.527		down	26268	-3.40282e+38	-150.278		down	27189	-3.94262e+16	-55.13	3.94262e+16	down	135207	-2.13768e+19	-64.2127	2.13768e+19	down	136685	-1.34091e+31	-103.403	1.34091e+31	down	163340	-3.40282e+38	-130.691		down
78000	-3.40282e+38	-131.551		down	137183	-3.40282e+38	-150.058		down	139436	-3.74029e+16	-55.054	3.74029e+16	down	23689	-2.01535e+19	-64.1277	2.01535e+19	down	140654	-8.37929e+30	-102.725	8.37929e+30	down	166081	-3.40282e+38	-130.635		down
23309	-3.40282e+38	-131.497		down	93616	-3.40282e+38	-149.645		down	23309	-3.34775e+16	-54.894	3.34775e+16	down	136860	-1.45432e+19	-63.657	1.45432e+19	down	99035	-7.38618e+30	-102.543	7.38618e+30	down	79396	-3.40282e+38	-130.304		down
90095	-3.40282e+38	-131.181		down	136178	-3.40282e+38	-149.482		down	103137	-3.09616e+16	-54.7813	3.09616e+16	down	29509	-1.34291e+19	-63.542	1.34291e+19	down	139020	-7.11659e+30	-102.489	7.11659e+30	down	141280	-3.40282e+38	-129.805		down
135575	-3.40282e+38	-131.131		down	27892	-3.40282e+38	-148.979		down	25530	-2.50444e+16	-54.4753	2.50444e+16	down	80255	-9.85344e+18	-63.0953	9.85344e+18	down	157228	-6.94751e+30	-102.454	6.94751e+30	down	27770	-3.40282e+38	-128.252		down
24111	-3.40282e+38	-130.892		down	141302	-3.40282e+38	-148.322		down	139522	-2.37702e+16	-54.4	2.37702e+16	down	135260	-8.91535e+18	-62.951	8.91535e+18	down	23755	-3.56813e+30	-101.493	3.56813e+30	down	150399	-2.37637e+38	-127.482	2.37637e+38	down
90985	-3.40282e+38	-130.329		down	26285	-3.40282e+38	-148.008		down	62570	-2.2493e+16	-54.3203	2.2493e+16	down	23013	-8.75412e+18	-62.9247	8.75412e+18	down	25645	-2.3051e+30	-100.863	2.3051e+30	down	115316	-2.01073e+38	-127.241	2.01073e+38	down
77451	-3.40282e+38	-129.294		down	141870	-3.40282e+38	-146.606		down	26667	-2.2071e+16	-54.293	2.2071e+16	down	22622	-8.47363e+18	-62.8777	8.47363e+18	down	83651	-1.70546e+30	-100.428	1.70546e+30	down	165310	-7.23995e+37	-125.767	7.23995e+37	down
26027	-3.40282e+38	-128.844		down	29239	-3.40282e+38	-146.596		down	137575	-2.1507e+16	-54.2557	2.1507e+16	down	161707	-8.26848e+18	-62.8423	8.26848e+18	down	138483	-1.09872e+30	-99.7937	1.09872e+30	down	104840	-4.82881e+37	-125.183	4.82881e+37	down
162050	-3.40282e+38	-128.424		down	73689	-3.40282e+38	-145.732		down	27770	-1.73046e+16	-53.942	1.73046e+16	down	24289	-7.72193e+18	-62.7437	7.72193e+18	down	24785	-9.87249e+29	-99.6393	9.87249e+29	down	89075	-1.27515e+37	-123.262	1.27515e+37	down
28272	-3.40282e+38	-128.116		down	22189	-3.40282e+38	-145.268		down	24574	-1.43016e+16	-53.667	1.43016e+16	down	27117	-6.2418e+18	-62.4367	6.2418e+18	down	27437	-9.04096e+29	-99.5124	9.04096e+29	down	26055	-9.89003e+36	-122.895	9.89003e+36	down
26285	-2.35119e+38	-127.467	2.35119e+38	down	105582	-3.40282e+38	-144.411		down	28252	-1.3697e+16	-53.6047	1.3697e+16	down	139015	-5.35772e+18	-62.2163	5.35772e+18	down	86716	-4.847e+29	-98.613	4.847e+29	down	148705	-9.34535e+36	-122.814	9.34535e+36	down
155844	-2.2065e+38	-127.375	2.2065e+38	down	140197	-3.40282e+38	-143.993		down	23928	-1.06723e+16	-53.2447	1.06723e+16	down	24486	-3.17391e+18	-61.461	3.17391e+18	down	165310	-4.78018e+29	-98.593	4.78018e+29	down	103638	-5.07099e+36	-121.932	5.07099e+36	down
135569	-2.13818e+38	-127.33	2.13818e+38	down	25340	-3.40282e+38	-143.684		down	152448	-6936103700000000	-52.623	6936103700000000	down	139106	-3.06444e+18	-61.4103	3.06444e+18	down	148705	-4.41193e+29	-98.4773	4.41193e+29	down	86713	-6.73117e+35	-119.018	6.73117e+35	down
137183	-1.84255e+38	-127.115	1.84255e+38	down	18691	-3.40282e+38	-143.558		down	143833	-6560210900000000	-52.5427	6560210900000000	down	140909	-2.1759e+18	-60.9163	2.1759e+18	down	27770	-2.80129e+29	-97.822	2.80129e+29	down	140654	-3.7034e+35	-118.156	3.7034e+35	down
167613	-1.43867e+38	-126.758	1.43867e+38	down	21841	-3.40282e+38	-143.525		down	163278	-5726839600000000	-52.3467	5726839600000000	down	136693	-2.13758e+18	-60.8907	2.13758e+18	down	71325	-2.29381e+29	-97.5337	2.29381e+29	down	150976	-2.71168e+35	-117.707	2.71168e+35	down
137803	-1.22353e+38	-126.524	1.22353e+38	down	23963	-3.40282e+38	-143.085		down	79257	-5458188900000000	-52.2773	5458188900000000	down	81866	-1.81877e+18	-60.6577	1.81877e+18	down	27117	-2.2565e+29	-97.51	2.2565e+29	down	137547	-1.94376e+35	-117.226	1.94376e+35	down
22144	-7.32746e+37	-125.785	7.32746e+37	down	23550	-3.40282e+38	-142.222		down	24177	-4275443180000000	-51.925	4275443180000000	down	22792	-1.38029e+18	-60.2597	1.38029e+18	down	139915	-1.91244e+29	-97.2713	1.91244e+29	down	137575	-1.16057e+35	-116.482	1.16057e+35	down
136172	-6.79262e+37	-125.675	6.79262e+37	down	136172	-3.40282e+38	-142.131		down	27626	-4255930340000000	-51.9184	4255930340000000	down	92637	-1.15158e+18	-59.9983	1.15158e+18	down	22254	-7.28927e+28	-95.8798	7.28927e+28	down	23087	-4.00712e+34	-114.948	4.00712e+34	down
135017	-4.69453e+37	-125.142	4.69453e+37	down	156209	-3.40282e+38	-139.768		down	23700	-3128358080000000	-51.4743	3128358080000000	down	24517	-1.0543e+18	-59.871	1.0543e+18	down	160247	-7.03574e+28	-95.8287	7.03574e+28	down	24771	-2.40793e+34	-114.213	2.40793e+34	down
137350	-3.82731e+37	-124.848	3.82731e+37	down	24111	-3.40282e+38	-139.274		down	27086	-1958475690000000	-50.7987	1958475690000000	down	24623	-9.98364e+17	-59.7923	9.98364e+17	down	163632	-6.12913e+28	-95.6297	6.12913e+28	down	29607	-2.17264e+34	-114.065	2.17264e+34	down
167382	-3.12456e+37	-124.555	3.12456e+37	down	28705	-3.40282e+38	-138.736		down	139923	-1805557680000000	-50.6814	1805557680000000	down	29360	-9.15508e+17	-59.6673	9.15508e+17	down	138526	-4.27423e+28	-95.1097	4.27423e+28	down	136529	-2.08028e+34	-114.002	2.08028e+34	down
136975	-1.83868e+37	-123.79	1.83868e+37	down	22518	-3.40282e+38	-138.323		down	28288	-1339863100000000	-50.251	1339863100000000	down	138967	-8.38074e+17	-59.5399	8.38074e+17	down	139198	-2.5907e+28	-94.3873	2.5907e+28	down	160247	-8.05225e+33	-112.633	8.05225e+33	down
71219	-1.242e+37	-123.224	1.242e+37	down	150959	-3.40282e+38	-138.321		down	25621	-1301398580000000	-50.209	1301398580000000	down	124482	-6.36235e+17	-59.1423	6.36235e+17	down	136549	-2.08735e+28	-94.0757	2.08735e+28	down	152926	-6.79769e+33	-112.389	6.79769e+33	down
29156	-1.195e+37	-123.168	1.195e+37	down	118073	-3.40282e+38	-135.713		down	26129	-1265242200000000	-50.1683	1265242200000000	down	87982	-1.57265e+17	-57.126	1.57265e+17	down	140564	-1.48214e+28	-93.5817	1.48214e+28	down	89251	-6.64855e+33	-112.357	6.64855e+33	down
28888	-1.14156e+37	-123.102	1.14156e+37	down	22622	-3.40282e+38	-134.287		down	24361	-1235494720000000	-50.134	1235494720000000	down	139622	-1.5357e+17	-57.0917	1.5357e+17	down	24698	-1.15535e+28	-93.2223	1.15535e+28	down	16887	-4.88392e+33	-111.912	4.88392e+33	down
51780	-4.85422e+36	-121.869	4.85422e+36	down	29075	-3.40282e+38	-134.246		down	86675	-1160747660000000	-50.044	1160747660000000	down	137148	-1.31574e+17	-56.8687	1.31574e+17	down	26129	-1.00371e+28	-93.0193	1.00371e+28	down	163584	-4.02702e+33	-111.633	4.02702e+33	down
165069	-3.20184e+36	-121.268	3.20184e+36	down	155564	-3.40282e+38	-134.226		down	140376	-420073974000000	-48.5776	420073974000000	down	135377	-1.09522e+17	-56.604	1.09522e+17	down	113715	-2.83028e+27	-91.193	2.83028e+27	down	28445	-1.86051e+33	-110.519	1.86051e+33	down
134896	-1.98334e+36	-120.577	1.98334e+36	down	140760	-3.40282e+38	-133.809		down	24273	-320059453000000	-48.1853	320059453000000	down	101065	-1.07145e+17	-56.5723	1.07145e+17	down	141124	-2.72891e+27	-91.1404	2.72891e+27	down	138526	-1.69547e+33	-110.385	1.69547e+33	down
27721	-1.92508e+36	-120.534	1.92508e+36	down	108212	-3.40282e+38	-133.535		down	136776	-285601333000000	-48.021	285601333000000	down	22575	-9.66313e+16	-56.4233	9.66313e+16	down	22838	-2.43665e+27	-90.977	2.43665e+27	down	137654	-7.89154e+32	-109.282	7.89154e+32	down
137009	-1.89815e+36	-120.514	1.89815e+36	down	25040	-3.40282e+38	-132.049		down	137705	-237619368000000	-47.7556	237619368000000	down	139713	-7.22083e+16	-56.003	7.22083e+16	down	129955	-2.26411e+27	-90.871	2.26411e+27	down	107941	-7.71995e+32	-109.25	7.71995e+32	down
22114	-1.14466e+36	-119.784	1.14466e+36	down	140631	-3.40282e+38	-131.216		down	78067	-186004682000000	-47.4023	186004682000000	down	140892	-4.4758e+16	-55.313	4.4758e+16	down	135402	-1.28724e+27	-90.0563	1.28724e+27	down	104457	-4.00916e+32	-108.305	4.00916e+32	down
144888	-7.12311e+35	-119.1	7.12311e+35	down	21720	-3.40282e+38	-130.739		down	135636	-174191408000000	-47.3077	174191408000000	down	21655	-3.3936e+16	-54.9137	3.3936e+16	down	64336	-9.96972e+26	-89.6877	9.96972e+26	down	138776	-3.66553e+32	-108.176	3.66553e+32	down
27029	-3.75509e+35	-118.176	3.75509e+35	down	25400	-3.40282e+38	-129.06		down	25340	-128047991000000	-46.8637	128047991000000	down	25747	-3.19424e+16	-54.8263	3.19424e+16	down	28354	-4.59015e+26	-88.5687	4.59015e+26	down	139522	-2.55732e+32	-107.656	2.55732e+32	down
23537	-3.4907e+35	-118.071	3.4907e+35	down	62619	-3.40282e+38	-128.593		down	27688	-126693449000000	-46.8483	126693449000000	down	135704	-3.04018e+16	-54.755	3.04018e+16	down	27787	-4.24825e+26	-88.457	4.24825e+26	down	24730	-1.75881e+32	-107.116	1.75881e+32	down
69648	-3.48019e+35	-118.067	3.48019e+35	down	23785	-3.40282e+38	-128.4		down	136250	-115189177000000	-46.711	115189177000000	down	127063	-2.62975e+16	-54.5458	2.62975e+16	down	24664	-3.49801e+26	-88.1767	3.49801e+26	down	113715	-1.1402e+32	-106.491	1.1402e+32	down
86171	-3.20766e+35	-117.949	3.20766e+35	down	23705	-1.42082e+38	-126.74	1.42082e+38	down	24785	-96906743000000	-46.4617	96906743000000	down	24273	-2.06596e+16	-54.1977	2.06596e+16	down	23280	-2.2128e+26	-87.516	2.2128e+26	down	22199	-6.84891e+31	-105.756	6.84891e+31	down
86121	-3.20766e+35	-117.949	3.20766e+35	down	22732	-1.39095e+38	-126.709	1.39095e+38	down	141204	-88454331000000	-46.33	88454331000000	down	26082	-1.94505e+16	-54.1107	1.94505e+16	down	94935	-1.76281e+26	-87.188	1.76281e+26	down	162432	-6.64323e+31	-105.712	6.64323e+31	down
135253	-2.40122e+35	-117.531	2.40122e+35	down	28089	-1.24145e+38	-126.545	1.24145e+38	down	141746	-88046209000000	-46.3233	88046209000000	down	140206	-1.79188e+16	-53.9923	1.79188e+16	down	149219	-1.27418e+26	-86.7197	1.27418e+26	down	163632	-5.40851e+31	-105.415	5.40851e+31	down
139370	-2.3519e+35	-117.501	2.3519e+35	down	138333	-1.19586e+38	-126.491	1.19586e+38	down	140323	-86815885000000	-46.303	86815885000000	down	150399	-1.66226e+16	-53.884	1.66226e+16	down	28445	-9.38781e+25	-86.279	9.38781e+25	down	99035	-5.0697e+31	-105.322	5.0697e+31	down
26268	-8.37711e+34	-116.012	8.37711e+34	down	24032	-8.39178e+37	-125.98	8.39178e+37	down	138483	-82113190000000	-46.2227	82113190000000	down	27634	-1.21319e+16	-53.4297	1.21319e+16	down	160280	-9.15653e+25	-86.243	9.15653e+25	down	135651	-2.20621e+31	-104.121	2.20621e+31	down
102506	-1.22812e+34	-113.242	1.22812e+34	down	108584	-7.56153e+37	-125.83	7.56153e+37	down	22483	-69463639000000	-45.9813	69463639000000	down	27402	-1.14405e+16	-53.345	1.14405e+16	down	27688	-7.66241e+25	-85.986	7.66241e+25	down	149294	-2.16729e+31	-104.096	2.16729e+31	down
155285	-1.03318e+34	-112.993	1.03318e+34	down	28229	-5.76098e+37	-125.438	5.76098e+37	down	147868	-65580783000000	-45.8983	65580783000000	down	135253	-9167124500000000	-53.0254	9167124500000000	down	23700	-5.72968e+25	-85.5667	5.72968e+25	down	22456	-1.03213e+31	-103.025	1.03213e+31	down
28288	-5.65697e+33	-112.124	5.65697e+33	down	17825	-5.66601e+37	-125.414	5.66601e+37	down	136293	-55594648000000	-45.66	55594648000000	down	136033	-9092915000000000	-53.0137	9092915000000000	down	149294	-4.78372e+25	-85.3063	4.78372e+25	down	71325	-1.01529e+31	-103.002	1.01529e+31	down
63988	-5.38159e+33	-112.052	5.38159e+33	down	166137	-3.65531e+37	-124.781	3.65531e+37	down	145870	-38644551000000	-45.1353	38644551000000	down	25634	-8889371100000000	-52.981	8889371100000000	down	141204	-3.71098e+25	-84.94	3.71098e+25	down	28303	-8.68077e+30	-102.776	8.68077e+30	down
29114	-4.82008e+33	-111.893	4.82008e+33	down	69436	-3.09298e+37	-124.54	3.09298e+37	down	140631	-28426895400000	-44.6923	28426895400000	down	126625	-5234635300000000	-52.217	5234635300000000	down	137389	-2.16017e+25	-84.1594	2.16017e+25	down	138483	-7.11317e+30	-102.488	7.11317e+30	down
26082	-3.05333e+33	-111.234	3.05333e+33	down	139777	-2.74039e+37	-124.366	2.74039e+37	down	22332	-22693072100000	-44.3673	22693072100000	down	157473	-4729678100000000	-52.0707	4729678100000000	down	29607	-1.63179e+25	-83.7547	1.63179e+25	down	157228	-5.79104e+30	-102.192	5.79104e+30	down
118529	-2.51412e+33	-110.954	2.51412e+33	down	135277	-2.47937e+37	-124.221	2.47937e+37	down	25815	-19197709000000	-44.126	19197709000000	down	118073	-4393507000000000	-51.9643	4393507000000000	down	137037	-1.11818e+25	-83.2094	1.11818e+25	down	139915	-5.78565e+30	-102.19	5.78565e+30	down
93616	-2.10683e+33	-110.699	2.10683e+33	down	139015	-1.92829e+37	-123.859	1.92829e+37	down	89075	-16793765700000	-43.933	16793765700000	down	69436	-4304231540000000	-51.9347	4304231540000000	down	78067	-9.01126e+24	-82.898	9.01126e+24	down	137804	-3.76286e+30	-101.57	3.76286e+30	down
23699	-1.11396e+33	-109.779	1.11396e+33	down	22476	-1.87342e+37	-123.817	1.87342e+37	down	141205	-15205570400000	-43.7897	15205570400000	down	161778	-4081445680000000	-51.858	4081445680000000	down	164420	-8.5193e+24	-82.817	8.5193e+24	down	25905	-1.79152e+30	-100.499	1.79152e+30	down
23456	-9.90369e+32	-109.61	9.90369e+32	down	22575	-1.26926e+37	-123.255	1.26926e+37	down	25040	-11709049700000	-43.4127	11709049700000	down	98991	-3488819650000000	-51.6317	3488819650000000	down	24054	-8.37293e+24	-82.792	8.37293e+24	down	99535	-1.53847e+30	-100.279	1.53847e+30	down
135294	-8.3088e+32	-109.356	8.3088e+32	down	136369	-5.42966e+36	-122.03	5.42966e+36	down	133892	-9667884400000	-43.1363	9667884400000	down	137253	-3188974830000000	-51.502	3188974830000000	down	121871	-5.34949e+24	-82.1457	5.34949e+24	down	139405	-1.33406e+30	-100.074	1.33406e+30	down
154378	-7.39366e+32	-109.188	7.39366e+32	down	25778	-2.95104e+36	-121.151	2.95104e+36	down	23559	-8114634000000	-42.8837	8114634000000	down	135844	-3183060930000000	-51.4993	3183060930000000	down	139405	-3.49686e+24	-81.5323	3.49686e+24	down	83651	-1.25715e+30	-99.988	1.25715e+30	down
62570	-7.13688e+32	-109.137	7.13688e+32	down	21718	-1.17575e+36	-119.823	1.17575e+36	down	138153	-6970236500000	-42.6643	6970236500000	down	136354	-2914853910000000	-51.3723	2914853910000000	down	137380	-2.82333e+24	-81.2237	2.82333e+24	down	135402	-7.6622e+29	-99.2737	7.6622e+29	down
105582	-2.9106e+32	-107.843	2.9106e+32	down	22332	-6.70166e+35	-119.012	6.70166e+35	down	158213	-6451025700000	-42.5527	6451025700000	down	135080	-2105376860000000	-50.903	2105376860000000	down	135212	-1.97484e+24	-80.708	1.97484e+24	down	93827	-5.14349e+29	-98.6987	5.14349e+29	down
25040	-7.96267e+31	-105.973	7.96267e+31	down	139370	-4.21795e+35	-118.344	4.21795e+35	down	113715	-5716726800000	-42.3783	5716726800000	down	27092	-1970745610000000	-50.8077	1970745610000000	down	22757	-1.96482e+24	-80.7007	1.96482e+24	down	22757	-4.52763e+29	-98.5147	4.52763e+29	down
150959	-2.13152e+31	-104.072	2.13152e+31	down	27626	-3.20929e+35	-117.95	3.20929e+35	down	146859	-5682531100000	-42.3697	5682531100000	down	22759	-1908448990000000	-50.7613	1908448990000000	down	162432	-1.86657e+24	-80.6267	1.86657e+24	down	164420	-2.85554e+29	-97.8497	2.85554e+29	down
64649	-9.50145e+30	-102.906	9.50145e+30	down	22288	-2.99354e+35	-117.849	2.99354e+35	down	127030	-5180857800000	-42.2363	5180857800000	down	23705	-1886094890000000	-50.7443	1886094890000000	down	22439	-1.25241e+24	-80.051	1.25241e+24	down	135641	-1.90358e+29	-97.2646	1.90358e+29	down
26521	-5.59779e+30	-102.143	5.59779e+30	down	28272	-2.27549e+35	-117.454	2.27549e+35	down	27271	-4445044700000	-42.0153	4445044700000	down	161397	-1773252280000000	-50.6553	1773252280000000	down	22759	-1.18077e+24	-79.966	1.18077e+24	down	146288	-5.3394e+28	-95.4307	5.3394e+28	down
28904	-4.39289e+30	-101.793	4.39289e+30	down	163255	-2.14574e+35	-117.369	2.14574e+35	down	135419	-4322508930000	-41.975	4322508930000	down	23550	-1570320440000000	-50.48	1570320440000000	down	140894	-9.40439e+23	-79.6377	9.40439e+23	down	140564	-2.46117e+28	-94.3133	2.46117e+28	down
22299	-4.35045e+30	-101.779	4.35045e+30	down	138434	-1.65656e+35	-116.996	1.65656e+35	down	22137	-4216977100000	-41.9393	4216977100000	down	22338	-1329389280000000	-50.2397	1329389280000000	down	138581	-8.84576e+23	-79.5493	8.84576e+23	down	160684	-1.06513e+28	-93.105	1.06513e+28	down
107625	-2.35296e+30	-100.892	2.35296e+30	down	135881	-1.63753e+35	-116.979	1.63753e+35	down	139080	-3546003280000	-41.6893	3546003280000	down	24112	-1218758840000000	-50.1143	1218758840000000	down	22472	-8.52862e+23	-79.4967	8.52862e+23	down	137731	-9.49569e+27	-92.9393	9.49569e+27	down
135469	-2.32646e+30	-100.876	2.32646e+30	down	23699	-7.55678e+34	-115.863	7.55678e+34	down	135017	-3077723130000	-41.485	3077723130000	down	162310	-956219840000000	-49.7643	956219840000000	down	62619	-6.95616e+23	-79.2026	6.95616e+23	down	94935	-6.7925e+27	-92.456	6.7925e+27	down
83524	-1.30151e+30	-100.038	1.30151e+30	down	136397	-7.30619e+34	-115.815	7.30619e+34	down	26925	-1666555050000	-40.6	1666555050000	down	25905	-721153530000000	-49.3573	721153530000000	down	153717	-5.66459e+23	-78.9063	5.66459e+23	down	27787	-5.35766e+27	-92.1137	5.35766e+27	down
138333	-1.2606e+30	-99.992	1.2606e+30	down	29272	-6.24976e+34	-115.589	6.24976e+34	down	137577	-907639000000	-39.7233	907639000000	down	28252	-601967790000000	-49.0967	601967790000000	down	155757	-5.43765e+23	-78.8473	5.43765e+23	down	139198	-4.81633e+27	-91.96	4.81633e+27	down
136397	-9.70533e+29	-99.6147	9.70533e+29	down	136763	-5.97985e+34	-115.526	5.97985e+34	down	23550	-892465320000	-39.699	892465320000	down	107956	-554814983000000	-48.979	554814983000000	down	23093	-3.45805e+23	-78.1943	3.45805e+23	down	129955	-3.14184e+27	-91.3437	3.14184e+27	down
54377	-9.61151e+29	-99.6007	9.61151e+29	down	138961	-5.94265e+34	-115.517	5.94265e+34	down	102592	-849212470000	-39.6273	849212470000	down	25400	-469692053000000	-48.7387	469692053000000	down	162538	-1.28045e+23	-76.761	1.28045e+23	down	140757	-1.84968e+27	-90.5793	1.84968e+27	down
124067	-9.25409e+29	-99.546	9.25409e+29	down	28397	-3.83295e+34	-114.884	3.83295e+34	down	137753	-754083100000	-39.4559	754083100000	down	22421	-378423327000000	-48.427	378423327000000	down	77451	-1.15853e+23	-76.6166	1.15853e+23	down	138792	-9.21391e+26	-89.5739	9.21391e+26	down
102592	-6.79162e+29	-99.0997	6.79162e+29	down	29289	-2.89076e+34	-114.477	2.89076e+34	down	101218	-670916410000	-39.2873	670916410000	down	22855	-377029040000000	-48.4217	377029040000000	down	123017	-9.4889e+22	-76.3287	9.4889e+22	down	138259	-8.40667e+26	-89.4417	8.40667e+26	down
155467	-6.65179e+29	-99.0697	6.65179e+29	down	108004	-2.8078e+34	-114.435	2.8078e+34	down	139807	-523352932000	-38.929	523352932000	down	25914	-366544454000000	-48.381	366544454000000	down	158207	-5.17151e+22	-75.453	5.17151e+22	down	139772	-4.39699e+26	-88.5066	4.39699e+26	down
156209	-5.64278e+29	-98.8323	5.64278e+29	down	138377	-1.87181e+34	-113.85	1.87181e+34	down	158207	-492158484000	-38.8403	492158484000	down	136396	-346135978000000	-48.2983	346135978000000	down	22205	-4.8163e+22	-75.3503	4.8163e+22	down	101165	-2.79504e+26	-87.853	2.79504e+26	down
134119	-5.61035e+29	-98.824	5.61035e+29	down	128392	-1.72368e+34	-113.731	1.72368e+34	down	25747	-485160649000	-38.8197	485160649000	down	22254	-309244692000000	-48.1357	309244692000000	down	136693	-4.78077e+22	-75.3397	4.78077e+22	down	19345	-1.67466e+26	-87.114	1.67466e+26	down
140390	-3.55145e+29	-98.1643	3.55145e+29	down	136860	-1.53204e+34	-113.561	1.53204e+34	down	160690	-364467126000	-38.407	364467126000	down	81569	-300278042000000	-48.0933	300278042000000	down	85518	-3.66091e+22	-74.9546	3.66091e+22	down	140202	-1.67236e+26	-87.112	1.67236e+26	down
21718	-3.50328e+29	-98.1446	3.50328e+29	down	24436	-1.31293e+34	-113.338	1.31293e+34	down	137339	-321642988000	-38.2267	321642988000	down	80761	-292276853000000	-48.0543	292276853000000	down	24289	-2.53895e+22	-74.4266	2.53895e+22	down	27688	-1.28538e+26	-86.7323	1.28538e+26	down
136763	-2.61548e+29	-97.723	2.61548e+29	down	22483	-1.26209e+34	-113.281	1.26209e+34	down	147788	-308897022000	-38.1683	308897022000	down	145376	-290460216000000	-48.0453	290460216000000	down	163204	-2.28403e+22	-74.274	2.28403e+22	down	163355	-1.07243e+26	-86.471	1.07243e+26	down
23952	-2.49447e+29	-97.6547	2.49447e+29	down	140756	-1.09337e+34	-113.074	1.09337e+34	down	119705	-275512426000	-38.0033	275512426000	down	23460	-234786417000000	-47.7383	234786417000000	down	135510	-2.24583e+22	-74.2497	2.24583e+22	down	96296	-7.8705e+25	-86.0247	7.8705e+25	down
100875	-2.17801e+29	-97.4589	2.17801e+29	down	124482	-1.01874e+34	-112.972	1.01874e+34	down	22804	-270786150000	-37.9784	270786150000	down	135881	-200325361000000	-47.5093	200325361000000	down	135636	-2.02686e+22	-74.1017	2.02686e+22	down	78067	-7.71213e+25	-85.9953	7.71213e+25	down
28025	-2.04782e+29	-97.37	2.04782e+29	down	24496	-9.16016e+33	-112.819	9.16016e+33	down	136041	-250264404000	-37.8647	250264404000	down	138286	-176418651000000	-47.326	176418651000000	down	88063	-1.28372e+22	-73.4428	1.28372e+22	down	132088	-7.43575e+25	-85.9427	7.43575e+25	down
64368	-1.77531e+29	-97.164	1.77531e+29	down	22163	-8.26901e+33	-112.671	8.26901e+33	down	63782	-192714064000	-37.4877	192714064000	down	137744	-164491912000000	-47.225	164491912000000	down	135855	-8.12583e+21	-72.783	8.12583e+21	down	137389	-6.74805e+25	-85.8027	6.74805e+25	down
46155	-1.68813e+29	-97.0913	1.68813e+29	down	119879	6.4397e+23	79.0913	6.4397e+23	up	140962	1602359390000	40.5433	1602359390000	up	136512	4469339750000000	51.989	4469339750000000	up	23699	2.52248e+35	117.602	2.52248e+35	up	128879	1.86414e+35	117.166	1.86414e+35	up
139820	1342026020000000	50.2533	1342026020000000	up	89075	7.59297e+23	79.329	7.59297e+23	up	22897	2060320370000	40.906	2060320370000	up	22092	4916927400000000	52.1267	4916927400000000	up	135294	5.03571e+35	118.6	5.03571e+35	up	137339	2.37051e+35	117.513	2.37051e+35	up
139522	1436016810000000	50.351	1436016810000000	up	141188	9.38908e+23	79.6353	9.38908e+23	up	23120	2118704560000	40.9463	2118704560000	up	78000	4953334200000000	52.1373	4953334200000000	up	40624	6.728e+35	119.018	6.728e+35	up	120009	2.57017e+35	117.629	2.57017e+35	up
137575	2445412910000000	51.119	2445412910000000	up	25594	2.93711e+24	81.2807	2.93711e+24	up	140015	2501601920000	41.186	2501601920000	up	109731	5893313600000000	52.388	5893313600000000	up	147788	1.76488e+36	120.409	1.76488e+36	up	73708	2.75779e+35	117.731	2.75779e+35	up
106236	3468739610000000	51.6233	3468739610000000	up	24105	3.77032e+24	81.641	3.77032e+24	up	93616	2816469890000	41.357	2816469890000	up	28397	7018013600000000	52.64	7018013600000000	up	110561	1.78998e+36	120.429	1.78998e+36	up	138377	4.38077e+35	118.399	4.38077e+35	up
27787	3488035550000000	51.6313	3488035550000000	up	97631	4.1422e+24	81.7767	4.1422e+24	up	26561	2911699730000	41.405	2911699730000	up	23102	8250121600000000	52.8733	8250121600000000	up	131215	2.12078e+36	120.674	2.12078e+36	up	136688	8.26973e+35	119.315	8.26973e+35	up
123017	4005749570000000	51.831	4005749570000000	up	101165	6.26099e+24	82.3727	6.26099e+24	up	22134	3036819490000	41.4657	3036819490000	up	104807	9337786100000000	53.052	9337786100000000	up	64649	2.84659e+36	121.099	2.84659e+36	up	166137	9.63209e+35	119.535	9.63209e+35	up
101165	5631069900000000	52.3223	5631069900000000	up	161769	6.76019e+24	82.4833	6.76019e+24	up	135683	3472222580000	41.659	3472222580000	up	140140	1.00613e+16	53.1597	1.00613e+16	up	167613	5.11922e+36	121.945	5.11922e+36	up	21720	1.81619e+36	120.45	1.81619e+36	up
135775	5994922300000000	52.4127	5994922300000000	up	142526	6.9792e+24	82.5293	6.9792e+24	up	138581	4831693000000	42.1357	4831693000000	up	135017	1.0332e+16	53.198	1.0332e+16	up	88715	8.06634e+36	122.601	8.06634e+36	up	29289	1.81956e+36	120.453	1.81956e+36	up
23104	6105349700000000	52.439	6105349700000000	up	136342	7.24872e+24	82.584	7.24872e+24	up	132143	4911620200000	42.1593	4911620200000	up	104697	1.60713e+16	53.8353	1.60713e+16	up	136397	1.10447e+37	123.055	1.10447e+37	up	69436	1.89115e+36	120.509	1.89115e+36	up
161193	6486370700000000	52.5263	6486370700000000	up	138633	1.22417e+25	83.34	1.22417e+25	up	137183	6950911700000	42.6603	6950911700000	up	140390	2.05974e+16	54.1933	2.05974e+16	up	135575	2.41328e+37	124.182	2.41328e+37	up	28397	2.15885e+36	120.7	2.15885e+36	up
24289	6725947800000000	52.5787	6725947800000000	up	23048	1.41337e+25	83.5473	1.41337e+25	up	21931	10809316000000	43.2973	10809316000000	up	166519	3.22467e+16	54.84	3.22467e+16	up	28926	3.71496e+37	124.805	3.71496e+37	up	140756	2.22313e+36	120.742	2.22313e+36	up
139371	7806814400000000	52.7937	7806814400000000	up	139772	1.43244e+25	83.5667	1.43244e+25	up	37174	12854515200000	43.5473	12854515200000	up	61359	3.72734e+16	55.049	3.72734e+16	up	21718	3.75284e+37	124.819	3.75284e+37	up	23103	3.14698e+36	121.243	3.14698e+36	up
25044	8095313300000000	52.846	8095313300000000	up	162432	2.49574e+25	84.3677	2.49574e+25	up	28926	16263333000000	43.8867	16263333000000	up	106050	4.48098e+16	55.3147	4.48098e+16	up	134896	6.88128e+37	125.694	6.88128e+37	up	17825	6.61277e+36	122.315	6.61277e+36	up
27888	8194898000000000	52.8636	8194898000000000	up	138259	3.85072e+25	84.9933	3.85072e+25	up	94664	19073897300000	44.1167	19073897300000	up	134949	4.73875e+16	55.3954	4.73875e+16	up	155467	8.04441e+37	125.919	8.04441e+37	up	25778	1.4389e+37	123.436	1.4389e+37	up
24785	1.01876e+16	53.1777	1.01876e+16	up	135402	3.86233e+25	84.9977	3.86233e+25	up	165820	22442806300000	44.3513	22442806300000	up	29471	5.65876e+16	55.6513	5.65876e+16	up	132306	1.51793e+38	126.835	1.51793e+38	up	23699	1.71117e+37	123.686	1.71117e+37	up
24440	1.01971e+16	53.179	1.01971e+16	up	134949	4.6305e+25	85.2594	4.6305e+25	up	27079	22903940700000	44.3807	22903940700000	up	25253	9.34481e+16	56.375	9.34481e+16	up	136763	1.67955e+38	126.981	1.67955e+38	up	22288	1.97564e+37	123.894	1.97564e+37	up
140894	1.05567e+16	53.229	1.05567e+16	up	137795	5.23841e+25	85.4373	5.23841e+25	up	136529	25443526800000	44.5324	25443526800000	up	132306	1.01367e+17	56.4924	1.01367e+17	up	26280	2.0265e+38	127.252	2.0265e+38	up	24346	6.82828e+37	125.683	6.82828e+37	up
136115	1.06793e+16	53.2457	1.06793e+16	up	22199	1.18302e+26	86.6126	1.18302e+26	up	28014	30159216300000	44.7777	30159216300000	up	24346	1.19637e+17	56.7314	1.19637e+17	up	134709	2.99875e+38	127.818	2.99875e+38	up	22476	1.07059e+38	126.332	1.07059e+38	up
138483	1.33806e+16	53.571	1.33806e+16	up	24785	1.7567e+26	87.183	1.7567e+26	up	160280	30215090700000	44.7803	30215090700000	up	138848	1.45756e+17	57.0163	1.45756e+17	up	135033	3.15668e+38	127.892	3.15668e+38	up	23149	1.16802e+38	126.457	1.16802e+38	up
22440	1.79813e+16	53.9973	1.79813e+16	up	109510	1.94467e+26	87.3297	1.94467e+26	up	133004	30355226600000	44.787	30355226600000	up	140963	1.59132e+17	57.143	1.59132e+17	up	23381	3.16906e+38	127.897	3.16906e+38	up	23195	1.97848e+38	127.218	1.97848e+38	up
137284	3.1307e+16	54.7973	3.1307e+16	up	16887	2.58208e+26	87.7387	2.58208e+26	up	99535	50815520000000	45.5303	50815520000000	up	77095	2.11338e+17	57.5523	2.11338e+17	up	162050		128.378		up	135298		128.123		up
22003	3.45612e+16	54.94	3.45612e+16	up	28252	2.93668e+26	87.9243	2.93668e+26	up	22828	64482030000000	45.874	64482030000000	up	23952	3.00883e+17	58.062	3.00883e+17	up	26527		128.987		up	88063		128.591		up
122822	4.17126e+16	55.2113	4.17126e+16	up	164113	2.96466e+26	87.938	2.96466e+26	up	119879	93541217000000	46.4107	93541217000000	up	139660	3.93827e+17	58.4503	3.93827e+17	up	71219		130.127		up	140760		128.946		up
136153	5.11644e+16	55.506	5.11644e+16	up	143268	3.39844e+26	88.135	3.39844e+26	up	73072	110038698000000	46.645	110038698000000	up	134850	6.54581e+17	59.1833	6.54581e+17	up	167382		130.844		up	140703		130.439		up
137380	5.29934e+16	55.5567	5.29934e+16	up	134123	5.06024e+26	88.7093	5.06024e+26	up	25443	115966634000000	46.7207	115966634000000	up	27321	7.29655e+17	59.34	7.29655e+17	up	138339		132.294		up	138961		130.769		up
135598	6.09719e+16	55.759	6.09719e+16	up	160247	5.16058e+26	88.7377	5.16058e+26	up	136860	126402339000000	46.845	126402339000000	up	103638	7.60119e+17	59.399	7.60119e+17	up	101311		133.486		up	140015		131.548		up
140328	6.43295e+16	55.8363	6.43295e+16	up	25102	7.2847e+26	89.235	7.2847e+26	up	139735	172228927000000	47.2913	172228927000000	up	86713	8.28532e+17	59.5233	8.28532e+17	up	27029		135.648		up	23323		131.949		up
136767	6.61229e+16	55.876	6.61229e+16	up	89370	8.23755e+26	89.4123	8.23755e+26	up	145825	175160863000000	47.3157	175160863000000	up	137229	9.01642e+17	59.6453	9.01642e+17	up	24496		136.425		up	141870		132.197		up
135198	7.49175e+16	56.0562	7.49175e+16	up	22757	9.80061e+26	89.663	9.80061e+26	up	137350	191409647000000	47.4437	191409647000000	up	29139	9.23786e+17	59.6803	9.23786e+17	up	23656		136.722		up	23537		132.437		up
136028	1.07095e+17	56.5717	1.07095e+17	up	24814	1.84542e+27	90.576	1.84542e+27	up	165246	216343274000000	47.6203	216343274000000	up	129794	9.48212e+17	59.718	9.48212e+17	up	22144		136.989		up	28272		133.365		up
75851	1.20962e+17	56.7473	1.20962e+17	up	22824	2.61946e+27	91.0813	2.61946e+27	up	23323	252102434000000	47.841	252102434000000	up	165532	1.10929e+18	59.9443	1.10929e+18	up	140390		137.051		up	156209		133.714		up
25338	1.35493e+17	56.911	1.35493e+17	up	139660	3.29122e+27	91.4107	3.29122e+27	up	22254	280820783000000	47.9966	280820783000000	up	150976	1.34037e+18	60.2173	1.34037e+18	up	78000		137.284		up	140376		134.415		up
24853	1.39657e+17	56.9547	1.39657e+17	up	163355	5.12165e+27	92.0487	5.12165e+27	up	137787	361833647000000	48.3623	361833647000000	up	137140	1.44691e+18	60.3277	1.44691e+18	up	98608		137.383		up	23035		134.666		up
24593	2.16424e+17	57.5866	2.16424e+17	up	73456	1.13525e+28	93.197	1.13525e+28	up	135031	378077280000000	48.4257	378077280000000	up	137731	1.51148e+18	60.3907	1.51148e+18	up	29114		137.421		up	79934		135.09		up
27079	2.56783e+17	57.8333	2.56783e+17	up	147566	1.86996e+28	93.917	1.86996e+28	up	22125	388519688000000	48.465	388519688000000	up	157489	3.25566e+18	61.4977	3.25566e+18	up	140260		138.589		up	29114		136.946		up
163355	3.14318e+17	58.125	3.14318e+17	up	28445	2.82977e+28	94.5147	2.82977e+28	up	134167	430797199000000	48.614	430797199000000	up	23400	3.3892e+18	61.5556	3.3892e+18	up	51780		138.703		up	136178		137.01		up
135855	3.16286e+17	58.134	3.16286e+17	up	17498	3.4734e+28	94.8103	3.4734e+28	up	140328	458738746000000	48.7047	458738746000000	up	26848	3.57752e+18	61.6337	3.57752e+18	up	75218		139.309		up	135881		137.241		up
138259	3.2495e+17	58.173	3.2495e+17	up	26681	4.85906e+28	95.2947	4.85906e+28	up	136700	461185770000000	48.7123	461185770000000	up	140623	3.66112e+18	61.667	3.66112e+18	up	143233		139.455		up	24777		137.893		up
136471	3.33934e+17	58.2123	3.33934e+17	up	22254	6.61928e+28	95.7407	6.61928e+28	up	24777	666680120000000	49.244	666680120000000	up	26703	3.80166e+18	61.7213	3.80166e+18	up	136975		139.796		up	26925		138.416		up
92261	3.4803e+17	58.272	3.4803e+17	up	121871	8.50327e+28	96.102	8.50327e+28	up	24730	772573210000000	49.4567	772573210000000	up	121876	6.09642e+18	62.4027	6.09642e+18	up	22288		140.379		up	140906		138.441		up
22456	4.28684e+17	58.5727	4.28684e+17	up	133004	9.87895e+28	96.3183	9.87895e+28	up	23104	869805100000000	49.6277	869805100000000	up	156961	6.35528e+18	62.4627	6.35528e+18	up	132098		140.498		up	150219		138.953		up
139155	4.45542e+17	58.6283	4.45542e+17	up	149784	1.19451e+29	96.5923	1.19451e+29	up	22241	1462476230000000	50.3773	1462476230000000	up	166998	6.61605e+18	62.5207	6.61605e+18	up	22114		140.829		up	136397		139.255		up
162432	7.01234e+17	59.2827	7.01234e+17	up	135538	1.25825e+29	96.6673	1.25825e+29	up	143233	1525284490000000	50.438	1525284490000000	up	92313	7.50382e+18	62.7023	7.50382e+18	up	146859		140.935		up	140197		139.563		up
132403	8.87385e+17	59.6223	8.87385e+17	up	139266	1.47743e+29	96.899	1.47743e+29	up	26285	1687348230000000	50.5837	1687348230000000	up	137787	8.10588e+18	62.8137	8.10588e+18	up	23537		141.237		up	28926		140.296		up
111188	9.48001e+17	59.7177	9.48001e+17	up	134880	6.68105e+29	99.076	6.68105e+29	up	29272	1857567180000000	50.7223	1857567180000000	up	132143	8.48134e+18	62.879	8.48134e+18	up	22155		141.281		up	24493		141.064		up
162538	1.68291e+18	60.5457	1.68291e+18	up	88994	1.30207e+30	100.039	1.30207e+30	up	145827	2118566980000000	50.912	2118566980000000	up	138339	9.17676e+18	62.9927	9.17676e+18	up	135641		141.757		up	137009		141.074		up
138088	2.44689e+18	61.0857	2.44689e+18	up	136563	4.42643e+30	101.804	4.42643e+30	up	135298	4261628420000000	51.9203	4261628420000000	up	120835	1.07428e+19	63.22	1.07428e+19	up	26268		143.174		up	28913		142.164		up
142624	2.50584e+18	61.12	2.50584e+18	up	132088	5.26035e+30	102.053	5.26035e+30	up	59564	5253965800000000	52.2223	5253965800000000	up	25349	1.16287e+19	63.3343	1.16287e+19	up	63988		143.601		up	22189		142.248		up
24692	2.8375e+18	61.2993	2.8375e+18	up	125019	6.19091e+30	102.288	6.19091e+30	up	22529	7797901800000000	52.792	7797901800000000	up	22824	1.16665e+19	63.339	1.16665e+19	up	28272		144.028		up	86675		143.925		up
22439	4.23874e+18	61.8783	4.23874e+18	up	22472	7.86157e+30	102.633	7.86157e+30	up	160952	8517624500000000	52.9194	8517624500000000	up	29239	1.34416e+19	63.5433	1.34416e+19	up	29272		144.095		up	22155		144.781		up
90431	4.72495e+18	62.035	4.72495e+18	up	103638	8.11819e+30	102.679	8.11819e+30	up	121018	1.06818e+16	53.246	1.06818e+16	up	137009	1.56955e+19	63.767	1.56955e+19	up	136172		144.395		up	136763		144.784		up
89251	4.88372e+18	62.0827	4.88372e+18	up	25349	1.27182e+31	103.327	1.27182e+31	up	24486	1.73766e+16	53.948	1.73766e+16	up	66484	1.98531e+19	64.106	1.98531e+19	up	108725		144.864		up	135575		145.245		up
128405	5.73834e+18	62.3153	5.73834e+18	up	79934	2.68381e+31	104.404	2.68381e+31	up	22456	3.39899e+16	54.916	3.39899e+16	up	140341	2.0961e+19	64.1843	2.0961e+19	up	26082		145.748		up	25144		145.252		up
163340	5.75158e+18	62.3187	5.75158e+18	up	83651	2.93746e+31	104.534	2.93746e+31	up	21998	4.03185e+16	55.1623	4.03185e+16	up	22235	2.54564e+19	64.4647	2.54564e+19	up	26055		145.941		up	136915		145.659		up
139772	5.90519e+18	62.3567	5.90519e+18	up	139198	6.11452e+31	105.592	6.11452e+31	up	27339	5.71784e+16	55.6663	5.71784e+16	up	166137	3.28002e+19	64.8303	3.28002e+19	up	135556		147.261		up	21718		146.498		up
27751	6.96743e+18	62.5953	6.96743e+18	up	116093	1.28044e+32	106.658	1.28044e+32	up	142007	5.89494e+16	55.7103	5.89494e+16	up	75218	4.47239e+19	65.2777	4.47239e+19	up	155146		148.932		up	26280		147.25		up
25493	1.00624e+19	63.1256	1.00624e+19	up	139405	1.78382e+32	107.137	1.78382e+32	up	153921	6.96508e+16	55.951	6.96508e+16	up	26301	5.38283e+19	65.545	5.38283e+19	up	24032		150.864		up	28089		148.914		up
26312	1.2796e+19	63.4723	1.2796e+19	up	164420	1.89779e+32	107.226	1.89779e+32	up	24032	1.4834e+17	57.0417	1.4834e+17	up	149152	5.50739e+19	65.578	5.50739e+19	up	93616		152.056		up	138136		150.787		up
133004	1.28287e+19	63.476	1.28287e+19	up	139466	2.33535e+32	107.525	2.33535e+32	up	137731	1.77919e+17	57.304	1.77919e+17	up	86319	5.67137e+19	65.6203	5.67137e+19	up	138776		153.758		up	28309		151.058		up
135510	1.35445e+19	63.5543	1.35445e+19	up	17994	4.31682e+32	108.412	4.31682e+32	up	27274	2.40864e+17	57.741	2.40864e+17	up	86172	5.67137e+19	65.6203	5.67137e+19	up	27892		153.79		up	137917		153.091		up
104840	4.9475e+19	65.4233	4.9475e+19	up	137787	2.05533e+33	110.663	2.05533e+33	up	23669	2.41921e+17	57.7473	2.41921e+17	up	28303	8.15137e+19	66.1437	8.15137e+19	up	23102		153.99		up	73689		153.355		up
138198	5.16119e+19	65.4843	5.16119e+19	up	89251	2.48983e+33	110.94	2.48983e+33	up	138750	3.02562e+17	58.07	3.02562e+17	up	25378	1.02276e+20	66.471	1.02276e+20	up	24493		154.593		up	23785		153.627		up
29288	5.42025e+19	65.555	5.42025e+19	up	26286	3.51626e+33	111.438	3.51626e+33	up	26681	3.82701e+17	58.409	3.82701e+17	up	122691	1.1348e+20	66.621	1.1348e+20	up	26124		155.612		up	22711		155.199		up
29361	7.91921e+19	66.102	7.91921e+19	up	160280	3.69021e+33	111.507	3.69021e+33	up	138804	5.07674e+17	58.8167	5.07674e+17	up	22108	1.23866e+20	66.7473	1.23866e+20	up	25144		155.786		up	23963		155.457		up
97631	9.56236e+19	66.374	9.56236e+19	up	144610	6.31593e+33	112.283	6.31593e+33	up	138967	8.6053e+17	59.578	8.6053e+17	up	99535	1.4427e+20	66.9673	1.4427e+20	up	22001		156.033		up	28705		157.148		up
138633	9.5823e+19	66.377	9.5823e+19	up	135419	9.71601e+33	112.904	9.71601e+33	up	75218	1.0243e+18	59.8293	1.0243e+18	up	161882	1.77126e+20	67.2633	1.77126e+20	up	145376		156.217		up	152931		157.486		up
104783	1.06963e+20	66.5357	1.06963e+20	up	23310	1.04931e+34	113.015	1.04931e+34	up	137027	1.25872e+18	60.1267	1.25872e+18	up	102592	1.90146e+20	67.3657	1.90146e+20	up	147807		157.431		up	159766		157.531		up
89370	1.41172e+20	66.936	1.41172e+20	up	86319	3.09822e+34	114.577	3.09822e+34	up	135033	1.36916e+18	60.248	1.36916e+18	up	114522	2.01358e+20	67.4483	2.01358e+20	up	121322		158.471		up	140507		160.268		up
141188	1.62951e+20	67.143	1.62951e+20	up	86172	3.09822e+34	114.577	3.09822e+34	up	74100	1.74264e+18	60.596	1.74264e+18	up	22001	2.4773e+20	67.7473	2.4773e+20	up	128392		158.664		up	136860		160.406		up
24054	1.75496e+20	67.25	1.75496e+20	up	138581	9.86357e+34	116.248	9.86357e+34	up	142526	1.90481e+18	60.7244	1.90481e+18	up	137336	3.3685e+20	68.1907	3.3685e+20	up	24360		159.136		up	136172		160.851		up
28126	2.59207e+20	67.8127	2.59207e+20	up	138763	1.4421e+35	116.796	1.4421e+35	up	129747	1.96241e+18	60.7673	1.96241e+18	up	139984	3.56222e+20	68.2713	3.56222e+20	up	23042		160.007		up	157895		161.47		up
127113	3.28775e+20	68.1557	3.28775e+20	up	139318	1.63979e+35	116.981	1.63979e+35	up	138339	3.15567e+18	61.4527	3.15567e+18	up	135651	4.24113e+20	68.523	4.24113e+20	up	29156		160.726		up	140323		161.885		up
137876	3.69039e+20	68.3223	3.69039e+20	up	137412	2.54063e+35	117.613	2.54063e+35	up	165310	3.39314e+18	61.5573	3.39314e+18	up	108212	6.17239e+20	69.0644	6.17239e+20	up	152952		160.995		up	27179		162.364		up
27117	3.97999e+20	68.4313	3.97999e+20	up	109837	8.77164e+35	119.4	8.77164e+35	up	147366	3.94117e+18	61.7733	3.94117e+18	up	136700	6.65959e+20	69.174	6.65959e+20	up	90095		161.439		up	139278		162.623		up
143057	5.08563e+20	68.785	5.08563e+20	up	138692	9.30613e+35	119.486	9.30613e+35	up	143869	4.53773e+18	61.9767	4.53773e+18	up	71219	1.08964e+21	69.8843	1.08964e+21	up	22303		163.246		up	29272		166.312		up
147366	6.03949e+20	69.033	6.03949e+20	up	109849	2.47128e+36	120.895	2.47128e+36	up	28524	5.88051e+18	62.3506	5.88051e+18	up	152952	1.09997e+21	69.8979	1.09997e+21	up	22189		165.036		up	25489		169.027		up
166774	6.92958e+20	69.2313	6.92958e+20	up	25687	5.52069e+36	122.054	5.52069e+36	up	136720	6.53696e+18	62.5033	6.53696e+18	up	116093	1.49123e+21	70.337	1.49123e+21	up	28870		165.694		up	135250		169.082		up
28674	7.20549e+20	69.2877	7.20549e+20	up	96296	6.30394e+36	122.246	6.30394e+36	up	140032	7.6847e+18	62.7367	7.6847e+18	up	140756	1.61425e+21	70.4514	1.61425e+21	up	69091		166.405		up	153117		170.889		up
134880	7.76918e+20	69.3963	7.76918e+20	up	21998	6.65867e+36	122.325	6.65867e+36	up	24496	8.3068e+18	62.849	8.3068e+18	up	26252	2.22761e+21	70.916	2.22761e+21	up	139559		168.037		up	28288		170.945		up
73732	1.25284e+21	70.0857	1.25284e+21	up	139547	9.14461e+36	122.782	9.14461e+36	up	136342	9.5487e+18	63.05	9.5487e+18	up	72733	2.88287e+21	71.288	2.88287e+21	up	137183		169.775		up	24496		175.668		up
28445	1.42785e+21	70.2743	1.42785e+21	up	137654	2.26472e+37	124.091	2.26472e+37	up	166519	1.29358e+19	63.488	1.29358e+19	up	137592	5.17243e+21	72.1313	5.17243e+21	up	118073		171.058		up	26268		177.441		up
89075	1.62734e+21	70.463	1.62734e+21	up	145827	2.35002e+37	124.144	2.35002e+37	up	162904	1.63283e+19	63.824	1.63283e+19	up	137392	7.4704e+21	72.6617	7.4704e+21	up	137350		172.291		up	22114		178.108		up
94935	1.98735e+21	70.7513	1.98735e+21	up	24779	3.50236e+37	124.72	3.50236e+37	up	23456	1.8739e+19	64.0227	1.8739e+19	up	61883	8.42006e+21	72.8343	8.42006e+21	up	28089		172.364		up	141084		179.073		up
120494	3.30772e+21	71.4863	3.30772e+21	up	167046	9.70903e+37	126.191	9.70903e+37	up	26280	1.95525e+19	64.084	1.95525e+19	up	138750	1.33848e+22	73.503	1.33848e+22	up	28397		173.34		up	135198		179.72		up
22757	4.25308e+21	71.849	4.25308e+21	up	121983	1.17558e+38	126.467	1.17558e+38	up	25771	2.04588e+19	64.1493	2.04588e+19	up	27937	1.60829e+22	73.7679	1.60829e+22	up	23960		173.403		up	29295		180.627		up
160247	4.50912e+21	71.9333	4.50912e+21	up	139561		128.267		up	78982	2.41892e+19	64.391	2.41892e+19	up	119569	2.15835e+22	74.1923	2.15835e+22	up	23456		173.632		up	23190		181.181		up
119569	5.64317e+21	72.257	5.64317e+21	up	150399		129.816		up	135322	2.96017e+19	64.6823	2.96017e+19	up	28014	2.38101e+22	74.334	2.38101e+22	up	27737		174.116		up	135469		182.837		up
141205	5.95665e+21	72.335	5.95665e+21	up	137547		130.529		up	137412	5.86192e+19	65.668	5.86192e+19	up	25098	2.63948e+22	74.4827	2.63948e+22	up	156961		174.159		up	24032		183.022		up
23093	6.77004e+21	72.5196	6.77004e+21	up	23087		130.831		up	135329	1.36898e+20	66.8917	1.36898e+20	up	27933	2.90641e+22	74.6217	2.90641e+22	up	25400		175.557		up	140859		183.163		up
27402	7.14948e+21	72.5983	7.14948e+21	up	25280		131.463		up	101311	1.53522e+20	67.057	1.53522e+20	up	21998	3.19677e+22	74.759	3.19677e+22	up	137917		177.079		up	135083		185.246		up
149784	8.94357e+21	72.9213	8.94357e+21	up	135322		132.284		up	140559	1.59485e+20	67.112	1.59485e+20	up	149036	5.99839e+22	75.667	5.99839e+22	up	29587		177.434		up	167613		186.863		up
139286	1.2189e+22	73.368	1.2189e+22	up	27339		134.312		up	23946	2.1093e+20	67.5153	2.1093e+20	up	140260	9.37349e+22	76.311	9.37349e+22	up	26285		178.05		up	24360		187.193		up
94573	1.24338e+22	73.3967	1.24338e+22	up	86713		134.524		up	148705	2.82868e+20	67.9387	2.82868e+20	up	24105	9.80984e+22	76.3766	9.80984e+22	up	102624		178.517		up	28742		188.842		up
25102	1.68325e+22	73.8337	1.68325e+22	up	139417		136.19		up	134949	3.03377e+20	68.0397	3.03377e+20	up	162050	1.56879e+23	77.054	1.56879e+23	up	81600		179.619		up	23400		189.904		up
138762	2.04614e+22	74.1153	2.04614e+22	up	141137		137.51		up	22234	3.25586e+20	68.1416	3.25586e+20	up	143233	1.9123e+23	77.3397	1.9123e+23	up	28742		180.329		up	93616		191.002		up
88039	2.82561e+22	74.581	2.82561e+22	up	136784		137.789		up	24923	3.67121e+20	68.3148	3.67121e+20	up	118529	4.93827e+23	78.7083	4.93827e+23	up	135198		181.822		up	72573		191.03		up
92041	3.53799e+22	74.9053	3.53799e+22	up	123713		137.855		up	29509	4.66241e+20	68.6596	4.66241e+20	up	121871	1.10016e+24	79.864	1.10016e+24	up	140015		181.987		up	24776		191.279		up
86713	3.78051e+22	75.001	3.78051e+22	up	139915		138.034		up	136625	5.62597e+20	68.9307	5.62597e+20	up	93600	1.99778e+24	80.7247	1.99778e+24	up	26521		182.216		up	26124		191.534		up
137389	4.33566e+22	75.1987	4.33566e+22	up	152926		138.429		up	21787	1.19486e+21	70.0173	1.19486e+21	up	19345	2.07493e+24	80.7793	2.07493e+24	up	24346		182.414		up	87783		191.978		up
149219	4.469e+22	75.2424	4.469e+22	up	135536		139.071		up	139660	1.53176e+21	70.3757	1.53176e+21	up	22144	2.14859e+24	80.8297	2.14859e+24	up	21811		182.828		up	137183		192.719		up
89679	5.21225e+22	75.4643	5.21225e+22	up	23928		142.771		up	155844	3.5616e+21	71.593	3.5616e+21	up	132098	2.33222e+24	80.948	2.33222e+24	up	24776		182.903		up	128392		192.803		up
135402	6.48868e+22	75.7803	6.48868e+22	up	31035		143.056		up	137592	3.71882e+21	71.6553	3.71882e+21	up	140092	3.59439e+24	81.572	3.59439e+24	up	166137		184.366		up	156458		194.628		up
138776	8.01242e+22	76.0847	8.01242e+22	up	77095		143.926		up	95600	6.02323e+21	72.351	6.02323e+21	up	22844	4.40472e+24	81.8653	4.40472e+24	up	22125		184.913		up	27721		196.145		up
26041	1.0827e+23	76.519	1.0827e+23	up	138510		144.348		up	29239	7.43261e+21	72.6544	7.43261e+21	up	142007	4.61523e+24	81.9327	4.61523e+24	up	22897		185.671		up	54377		196.726		up
109510	1.33544e+23	76.8217	1.33544e+23	up	135501		145.055		up	139706	1.33377e+22	73.4979	1.33377e+22	up	167029	5.33836e+24	82.1427	5.33836e+24	up	24486		188.659		up	24436		198.214		up
143268	1.66208e+23	77.1373	1.66208e+23	up	140091		145.077		up	25144	1.36093e+22	73.527	1.36093e+22	up	25033	9.73874e+24	83.01	9.73874e+24	up	28309		190.136		up	26285		198.591		up
153717	2.30536e+23	77.6093	2.30536e+23	up	99535		145.81		up	95899	1.72778e+22	73.8713	1.72778e+22	up	23381	1.00937e+25	83.0617	1.00937e+25	up	121018		190.489		up	26082		199.858		up
91509	4.53692e+23	78.5861	4.53692e+23	up	119569		146.449		up	135501	4.49793e+22	75.2517	4.49793e+22	up	140906	1.23663e+25	83.3546	1.23663e+25	up	140756		191.193		up	22446		200.465		up
99535	5.4189e+23	78.8423	5.4189e+23	up	150976		146.879		up	155342	5.45512e+22	75.53	5.45512e+22	up	136838	1.42486e+25	83.559	1.42486e+25	up	141084		192.136		up	24190		200.901		up
86716	8.14168e+23	79.4297	8.14168e+23	up	29121		147.699		up	18691	6.72213e+22	75.8313	6.72213e+22	up	64649	3.28476e+25	84.764	3.28476e+25	up	161769		192.416		up	154378		201.035		up
137795	8.90113e+23	79.5583	8.90113e+23	up	134709		147.947		up	23190	8.11888e+22	76.1037	8.11888e+22	up	138429	5.05526e+25	85.386	5.05526e+25	up	27179		193.548		up	28904		201.646		up
132088	1.24838e+24	80.0463	1.24838e+24	up	167825		148.642		up	29297	8.37792e+22	76.149	8.37792e+22	up	77508	6.90428e+25	85.8357	6.90428e+25	up	139120		195.431		up	143263		201.731		up
73456	1.2927e+24	80.0967	1.2927e+24	up	25027		148.812		up	94046	2.31176e+23	77.6133	2.31176e+23	up	107668	1.08328e+26	86.4855	1.08328e+26	up	105582		196.352		up	88494		203.927		up
164113	1.59592e+24	80.4007	1.59592e+24	up	139706		149.504		up	139547	3.83525e+23	78.3437	3.83525e+23	up	136997	1.23744e+26	86.6775	1.23744e+26	up	139643		196.706		up	145376		204.262		up
22838	1.60411e+24	80.4081	1.60411e+24	up	24771		149.633		up	128392	6.35378e+23	79.072	6.35378e+23	up	167014	1.76363e+26	87.1887	1.76363e+26	up	143263		198.678		up	163255		204.96		up
89104	1.7708e+24	80.5507	1.7708e+24	up	137731		150.243		up	101576	6.68693e+23	79.1457	6.68693e+23	up	24959	2.01465e+26	87.3807	2.01465e+26	up	155844		198.968		up	88715		206.328		up
22482	2.57648e+24	81.0917	2.57648e+24	up	79396		152.12		up	138510	7.12556e+23	79.2374	7.12556e+23	up	143833	4.31154e+26	88.4783	4.31154e+26	up	135277		199.223		up	28670		206.706		up
134123	5.24783e+24	82.118	5.24783e+24	up	72414		152.567		up	77508	9.21505e+23	79.6083	9.21505e+23	up	136723	9.67911e+26	89.645	9.67911e+26	up	63283		199.294		up	139370		207.151		up
63812	1.1504e+25	83.2503	1.1504e+25	up	24731		152.812		up	21841	9.49604e+23	79.6517	9.49604e+23	up	148911	1.10313e+27	89.8337	1.10313e+27	up	24430		199.437		up	135205		209.453		up
85015	1.1651e+25	83.2687	1.1651e+25	up	95600		156.031		up	26124	1.09507e+24	79.8573	1.09507e+24	up	131215	1.63801e+27	90.404	1.63801e+27	up	135253		199.75		up	136394		218.713		up
109837	1.18711e+25	83.2957	1.18711e+25	up	24730		156.573		up	22398	1.24289e+24	80.04	1.24289e+24	up	90095	2.54841e+27	91.0417	2.54841e+27	up	144888		204.835		up	29239		219.25		up
136365	1.23012e+25	83.347	1.23012e+25	up	22456		157.941		up	26521	1.27164e+24	80.073	1.27164e+24	up	138692	1.69822e+28	93.778	1.69822e+28	up	137009		204.841		up	18691		219.389		up
22305	2.22503e+25	84.202	2.22503e+25	up	136529		158.535		up	151621	1.61112e+24	80.4143	1.61112e+24	up	138961	2.08161e+28	94.0717	2.08161e+28	up	139777		204.877		up	145870		221.076		up
96296	2.39738e+25	84.3097	2.39738e+25	up	137392		167.018		up	26488	2.12534e+24	80.814	2.12534e+24	up	46155	5.56616e+28	95.4907	5.56616e+28	up	137148		205.733		up	22125		221.985		up
22205	2.81375e+25	84.5407	2.81375e+25	up	140202		169.745		up	135253	5.62838e+24	82.219	5.62838e+24	up	25621	9.53344e+28	96.267	9.53344e+28	up	139370		206.308		up	145616		222.896		up
88994	3.33676e+25	84.7866	3.33676e+25	up	135165		170.628		up	140202	7.49738e+24	82.6327	7.49738e+24	up	90172	1.13691e+29	96.521	1.13691e+29	up	130627		206.706		up	118073		223.022		up
137547	4.17891e+25	85.1113	4.17891e+25	up	25493		170.961		up	24056	1.15995e+25	83.2623	1.15995e+25	up	150224	1.89705e+29	97.2597	1.89705e+29	up	29509		212.717		up	21841		223.176		up
139561	5.38446e+25	85.477	5.38446e+25	up	140623		171.862		up	28334	1.26242e+25	83.3844	1.26242e+25	up	138792	2.10735e+29	97.4113	2.10735e+29	up	27721		213.508		up	25400		224.296		up
147566	6.39725e+25	85.7257	6.39725e+25	up	24808		172.087		up	72573	2.03838e+25	84.0756	2.03838e+25	up	26521	4.34727e+29	98.456	4.34727e+29	up	25771		213.952		up	24880		224.45		up
144610	6.69077e+25	85.7904	6.69077e+25	up	24864		173.286		up	137009	2.4269e+25	84.3273	2.4269e+25	up	25687	4.36727e+29	98.4626	4.36727e+29	up	154378		214.768		up	28888		230.107		up
167014	9.47274e+25	86.292	9.47274e+25	up	137337		173.425		up	24436	3.54831e+25	84.8753	3.54831e+25	up	22456	8.18361e+29	99.3687	8.18361e+29	up	28650		215.023		up	167382		231.282		up
77095	1.00268e+26	86.374	1.00268e+26	up	167014		173.481		up	144888	6.43879e+25	85.735	6.43879e+25	up	28195	5.70466e+30	102.17	5.70466e+30	up	135569		216.585		up	29075		231.33		up
139266	1.12418e+26	86.539	1.12418e+26	up	25288		182.342		up	24814	1.89109e+26	87.2893	1.89109e+26	up	24056	7.87971e+30	102.636	7.87971e+30	up	26027		216.815		up	139120		231.391		up
150976	1.22423e+26	86.662	1.22423e+26	up	26473		183.65		up	118073	1.91795e+26	87.3097	1.91795e+26	up	40624	9.97432e+31	106.298	9.97432e+31	up	139739		217.297		up	135277		231.674		up
17498	1.46124e+26	86.9173	1.46124e+26	up	139010		187.103		up	163255	2.33142e+26	87.5913	2.33142e+26	up	22303	1.18342e+32	106.545	1.18342e+32	up	152622		218.06		up	23120		232.262		up
23048	1.49403e+26	86.9493	1.49403e+26	up	165310		187.325		up	26027	3.03321e+26	87.971	3.03321e+26	up	146859	1.61697e+32	106.995	1.61697e+32	up	136110		220.513		up	105582		232.92		up
137654	2.18992e+26	87.501	2.18992e+26	up	24673		187.982		up	25474	3.45156e+26	88.1574	3.45156e+26	up	136006	2.40098e+32	107.565	2.40098e+32	up	135704		220.527		up	130627		233.604		up
26286	2.45751e+26	87.6673	2.45751e+26	up	148705		190.752		up	22132	4.01446e+26	88.3753	4.01446e+26	up	25493	2.89525e+32	107.835	2.89525e+32	up	140906		221.796		up	134847		234.894		up
136549	2.58209e+26	87.7387	2.58209e+26	up	160684		191.227		up	105582	4.40408e+26	88.509	4.40408e+26	up	135683	2.90657e+32	107.841	2.90657e+32	up	24436		222.103		up	136625		236.676		up
139405	4.67578e+26	88.5953	4.67578e+26	up	148314		191.577		up	24779	4.75538e+26	88.6197	4.75538e+26	up	27632	3.87081e+32	108.254	3.87081e+32	up	136864		223.903		up	155844		243.416		up
16887	6.93008e+26	89.163	6.93008e+26	up	74100		193.397		up	26564	5.23272e+26	88.7577	5.23272e+26	up	164103	2.37404e+33	110.871	2.37404e+33	up	138961		224.84		up	139777		244.879		up
64336	9.84367e+26	89.6693	9.84367e+26	up	24959		194.177		up	139370	5.41354e+26	88.8067	5.41354e+26	up	152926	3.53673e+33	111.446	3.53673e+33	up	23705		225.764		up	29590		246.311		up
138024	1.07546e+27	89.797	1.07546e+27	up	136266		195.788		up	135569	7.38649e+26	89.255	7.38649e+26	up	23966	4.80776e+33	111.889	4.80776e+33	up	155400		226.216		up	24486		250.12		up
137731	1.11775e+27	89.8527	1.11775e+27	up	25443		197.505		up	89691	1.42071e+27	90.1987	1.42071e+27	up	155467	2.50841e+34	114.272	2.50841e+34	up	163255		226.649		up	25452		250.424		up
135097	1.73021e+27	90.483	1.73021e+27	up	90097		198.701		up	27906	1.6185e+27	90.3867	1.6185e+27	up	137803	2.75257e+34	114.406	2.75257e+34	up	22446		229.3		up	135253		252.776		up
135538	2.63161e+27	91.088	2.63161e+27	up	94052		198.88		up	27002	2.72251e+27	91.137	2.72251e+27	up	135450	3.25978e+34	114.65	3.25978e+34	up	99308		229.798		up	62570		253.172		up
26105	3.93847e+27	91.6697	3.93847e+27	up	93827		199.975		up	27721	9.72663e+27	92.974	9.72663e+27	up	23103	2.29504e+35	117.466	2.29504e+35	up	26561		230.052		up	147788		257.754		up
25905	4.66738e+27	91.9147	4.66738e+27	up	22804		200.192		up	23966	2.52448e+28	94.35	2.52448e+28	up	69091	1.2745e+36	119.939	1.2745e+36	up	27735		230.23		up	27892		258.168		up
22759	4.92439e+27	91.992	4.92439e+27	up	152931		200.411		up	23103	3.04557e+28	94.6207	3.04557e+28	up	81600	1.83643e+36	120.466	1.83643e+36	up	24814		231.66		up	137148		262.601		up
164420	5.66193e+27	92.1933	5.66193e+27	up	124504		200.836		up	140260	3.85392e+28	94.9603	3.85392e+28	up	137753	1.90165e+36	120.517	1.90165e+36	up	29590		236.196		up	135857		263.062		up
137392	2.53505e+28	94.356	2.53505e+28	up	25378		201.477		up	25400	4.66443e+28	95.2357	4.66443e+28	up	157895	2.66702e+36	121.005	2.66702e+36	up	28524		236.485		up	26308		264.981		up
17994	4.95088e+28	95.3217	4.95088e+28	up	26301		202.596		up	142006	5.10827e+28	95.3668	5.10827e+28	up	155146	2.07772e+37	123.966	2.07772e+37	up	150734		237.842		up	63283		267.195		up
138763	1.58564e+29	97.001	1.58564e+29	up	165246		203.214		up	29075	1.68034e+29	97.0847	1.68034e+29	up	27735	2.28945e+37	124.106	2.28945e+37	up	22234		238.19		up	25474		268.195		up
23310	4.18457e+29	98.401	4.18457e+29	up	141307		205.101		up	86811	2.53761e+29	97.6794	2.53761e+29	up	22946	4.33125e+37	125.026	4.33125e+37	up	23103		238.709		up	61605		271.989		up
115316	5.60128e+29	98.8217	5.60128e+29	up	121018		206.533		up	160684	3.44957e+29	98.1223	3.44957e+29	up	28650		130.731		up	151621		239.099		up	22487		272.978		up
28354	6.4312e+29	99.021	6.4312e+29	up	121322		216.941		up	26308	5.36057e+29	98.7583	5.36057e+29	up	124067		131.265		up	143869		240.46		up	150734		273.382		up
167046	7.1491e+29	99.1737	7.1491e+29	up	107941		218.01		up	164103	7.78313e+29	99.2963	7.78313e+29	up	29156		131.485		up	66180		243.426		up	108212		275.063		up
137412	8.17051e+29	99.3663	8.17051e+29	up	17517		218.352		up	28309	1.696e+30	100.42	1.696e+30	up	23656		131.615		up	21841		243.822		up	135704		275.282		up
136563	8.94291e+29	99.4967	8.94291e+29	up	25098		219.139		up	93827	3.06986e+30	101.276	3.06986e+30	up	23456		131.826		up	135205		246.796		up	29509		276.259		up
24779	9.10776e+29	99.523	9.10776e+29	up	129955		219.841		up	136784	3.1048e+30	101.292	3.1048e+30	up	23195		133.668		up	135857		247.315		up	28524		276.479		up
138510	1.19985e+30	99.9207	1.19985e+30	up	155148		223.52		up	28384	3.39517e+30	101.421	3.39517e+30	up	21811		134.088		up	144582		247.818		up	92464		276.492		up
24698	1.16141e+31	103.196	1.16141e+31	up	136838		224.642		up	135097	2.42653e+31	104.259	2.42653e+31	up	155342		134.318		up	92464		247.872		up	23705		276.508		up
22472	2.72745e+31	104.427	2.72745e+31	up	26041		227.636		up	26473	4.9793e+31	105.296	4.9793e+31	up	141350		135.513		up	23619		248.911		up	151621		278.155		up
139318	2.95035e+31	104.541	2.95035e+31	up	160952		228.992		up	154378	6.06211e+31	105.58	6.06211e+31	up	135033		136.659		up	27195		251.093		up	140559		281.586		up
135322	3.42279e+31	104.755	3.42279e+31	up	136700		229.796		up	25594	1.06681e+32	106.395	1.06681e+32	up	138962		136.767		up	23400		251.459		up	28334		281.974		up
135419	3.51751e+31	104.794	3.51751e+31	up	135418		230.141		up	148314	1.83346e+32	107.176	1.83346e+32	up	98608		142.744		up	25474		251.767		up	24430		283.982		up
83651	3.98498e+31	104.974	3.98498e+31	up	26263		230.584		up	135277	2.22011e+32	107.452	2.22011e+32	up	145616		143.072		up	77265		251.836		up	77265		283.998		up
139466	7.30338e+31	105.848	7.30338e+31	up	27632		233.375		up	140623	3.2295e+32	107.993	3.2295e+32	up	135250		144.73		up	23247		252.423		up	138804		285.941		up
24959	1.40864e+32	106.796	1.40864e+32	up	17250		237.024		up	89537	4.0576e+32	108.322	4.0576e+32	up	108725		145.308		up	26308		252.774		up	22398		286.507		up
139198	3.289e+32	108.019	3.289e+32	up	27906		237.981		up	66180	4.46188e+32	108.459	4.46188e+32	up	115316		147.285		up	88494		255.132		up	139559		286.938		up
139547	6.55973e+32	109.015	6.55973e+32	up	25168		238.068		up	107941	5.49329e+32	108.759	5.49329e+32	up	25443		150.094		up	28334		255.173		up	22897		288.702		up
139706	9.73555e+32	109.585	9.73555e+32	up	141041		240.702		up	27892	7.40086e+32	109.189	7.40086e+32	up	161769		150.214		up	24207		256.496		up	137037		291.377		up
140623	1.48629e+33	110.195	1.48629e+33	up	136512		240.79		up	28742	7.0964e+33	112.451	7.0964e+33	up	51780		150.294		up	136342		258.301		up	86811		294.725		up
145827	1.5419e+33	110.248	1.5419e+33	up	135641		243.164		up	139818	1.6519e+34	113.67	1.6519e+34	up	137350		150.313		up	162904		259.89		up	22132		297.588		up
136784	6.89458e+34	115.731	6.89458e+34	up	115316		246.107		up	25687	1.67253e+34	113.688	1.67253e+34	up	110561		150.326		up	155285		260.81		up	151292		298.469		up
72414	1.86549e+35	117.167	1.86549e+35	up	94573		249.184		up	41852	3.30659e+34	114.671	3.30659e+34	up	26041		151.117		up	23195		260.886		up	26027		300.325		up
109849	7.00888e+35	119.077	7.00888e+35	up	26703		251.447		up	115316	6.05669e+35	118.866	6.05669e+35	up	135212		152.204		up	137804		262.426		up	140627		305.559		up
134709	2.08825e+36	120.652	2.08825e+36	up	127030		255.764		up	94052	7.631e+35	119.199	7.631e+35	up	147807		152.366		up	22132		269.317		up	135569		306.293		up
138581	4.274e+36	121.685	4.274e+36	up	166519		259.735		up	24207	9.47091e+35	119.511	9.47091e+35	up	22508		156.17		up	136369		272.062		up	26561		307.119		up
27339	2.19607e+37	124.046	2.19607e+37	up	102624		262.221		up	139777	1.89679e+36	120.513	1.89679e+36	up	125778		157.721		up	86811		272.644		up	115001		310.653		up
27632	4.62362e+37	125.12	4.62362e+37	up	23669		264.152		up	135212	2.32874e+36	120.809	2.32874e+36	up	77451		158.399		up	151292		275.782		up	28518		311.734		up
135536	1.4846e+38	126.803	1.4846e+38	up	145826		265.193		up	29489	1.14841e+37	123.111	1.14841e+37	up	86171		158.717		up	41852		280.919		up	41852		313.986		up
31035		128.415		up	150224		265.522		up	151292	2.03785e+37	123.938	2.03785e+37	up	86121		158.717		up	157895		282.475		up	27002		316.528		up
27634		129.05		up	26488		270.348		up	24776	3.01739e+37	124.505	3.01739e+37	up	136110		161.41		up	29239		282.793		up	22234		320.938		up
25027		129.124		up	106119		273.509		up	161769	3.42064e+37	124.686	3.42064e+37	up	79934		163.837		up	140754		284.785		up	24207		325.773		up
140091		130.492		up	27933		273.985		up	150224	6.57199e+37	125.628	6.57199e+37	up	23963		166.205		up	28518		288.755		up	25771		329.939		up
160280		131.023		up	23966		275.348		up	90597	9.68651e+37	126.187	9.68651e+37	up	144888		168.902		up	141137		291.058		up	27737		330.065		up
167825		132.464		up	138792		279.486		up	40810	2.2564e+38	127.407	2.2564e+38	up	125019		170.391		up	140032		293.325		up	90172		331.272		up
139915		133.115		up	135097		280.563		up	129955		128.497		up	155285		171.352		up	165069		293.971		up	147973		332.528		up
140202		134.222		up	114522		282.139		up	28429		131.415		up	139923		172.07		up	29489		295.559		up	139818		334.809		up
25378		135.006		up	91509		288.255		up	28518		132.646		up	90985		175.766		up	137036		295.941		up	141082		336.31		up
28252		137.021		up	161882		292.086		up	121322		132.817		up	94573		175.787		up	91390		298.365		up	23309		336.742		up
26301		137.051		up	135683		295.877		up	123713		133.873		up	143869		176.445		up	79934		298.927		up	23044		340.598		up
25280		138.68		up	107257		296.857		up	115001		137.496		up	140316		186.771		up	76519		300.921		up	76519		342.148		up
136838		141.083		up	24698		301.758		up	138388		137.613		up	107941		188.989		up	135250		313.812		up	23247		345.285		up
135501		142.688		up	26848		311.29		up	23044		138.678		up	135061		189.733		up	27002		315.634		up	28640		347.988		up
95600		143.751		up	40810		313.487		up	140627		141.221		up	135097		190.08		up	115001		320.135		up	140754		356.056		up
22254		143.876		up	139984		313.523		up	132306		141.371		up	109665		190.647		up	23963		321.662		up	155400		359.411		up
25098		144.657		up	155342		317.525		up	108212		141.528		up	21787		195.662		up	23044		326.323		up	136864		361.65		up
24771		147.687		up	27321		322.474		up	29590		145.835		up	152448		195.77		up	127063		328.341		up	138962		368.56		up
89691		148.215		up	137804		331.617		up	135641		145.899		up	24698		198.563		up	87751		330.13		up	89537		368.772		up
24673		149.506		up	22171		334.287		up	155285		147.818		up	139818		201.73		up	138804		331.214		up	29587		378.973		up
148314		149.798		up	138776		338.019		up	27632		148.458		up	23120		203.921		up	89537		334.63		up	127063		382.886		up
21871		151.763		up	28374		350.54		up	23126		149.067		up	28670		208.435		up	135298		340.725		up	87751		395.22		up
24864		152.414		up	135212		353.721		up	23705		149.768		up	91509		209.669		up	108212		344.127		up	140032		396.026		up
136529		152.929		up	139923		355.275		up	141137		149.942		up	135298		212.601		up	28429		345.03		up	28055		406.537		up
79396		153.306		up	134850		360.157		up	127063		150.764		up	23619		219.03		up	24551		345.071		up	22675		406.828		up
121983		154.348		up	82841		361.665		up	24346		155.095		up	29489		221.496		up	140627		347.947		up	139739		412.806		up
136266		155.198		up	106250		368.158		up	135205		157.643		up	139417		226.006		up	141041		348.33		up	135556		414.793		up
94052		156.796		up	101576		378.783		up	90097		159.77		up	29075		233.163		up	141082		351.802		up	24551		425.23		up
23928		158.404		up	23656		381.678		up	61605		160.215		up	24814		234.947		up	145616		365.968		up	28429		437.241		up
137337		159.16		up	22851		392.444		up	136838		164.277		up	135641		239.022		up	24769		368.37		up	140055		440.468		up
165310		160.15		up	137336		397.452		up	87751		166.4		up	121322		242.595		up	29355		369.266		up	28106		440.468		up
26473		160.503		up	152448		402.137		up	124504		170.568		up	165208		245.162		up	139234		388.258		up	22036		449.423		up
136700		160.622		up	22446		412.127		up	165069		172.702		up	102624		249.607		up	90597		405.114		up	23126		459.069		up
123713		160.879		up	27195		416.381		up	134847		179.742		up	99308		253.174		up	28670		415.141		up	138153		466.85		up
160684		161.728		up	140316		421.914		up	23042		179.918		up	17517		253.283		up	138967		421.078		up	136975		466.852		up
26055		161.956		up	137753		425.183		up	138185		183.685		up	138776		261.934		up	90172		427.793		up	25706		476.486		up
23966		163.459		up	26055		430.792		up	140316		184.704		up	26055		268.836		up	23120		436.183		up	136997		477.471		up
148705		166.416		up	25621		439.853		up	138792		189.912		up	136342		277.835		up	23126		451.536		up	138967		480.618		up
26237		168.152		up	77508		440.218		up	102624		191.131		up	141137		278.627		up	145952		455.119		up	28870		496.12		up
150224		168.263		up	89691		452.915		up	136006		191.689		up	24769		278.902		up	29075		464.493		up	90597		511.629		up
138185		171.773		up	142007		474.171		up	24551		191.945		up	141041		301.558		up	23035		471.601		up	69648		519.012		up
141307		173.081		up	147807		495.613		up	92464		194.222		up	89691		304.7		up	138962		505.327		up	107668		538.89		up
28843		173.604		up	22508		496.733		up	140140		212.336		up	140559		306.921		up	140704		507.947		up	141350		549.551		up
93827		173.87		up	25033		503.512		up	138776		229.843		up	23035		336.935		up	138153		517.265		up	162904		550.159		up
24808		174.583		up	24056		527.97		up	137804		230.048		up	121018		343.775		up	28705		524.407		up	144582		551.913		up
138792		182.074		up	143324		528.21		up	22508		232.837		up	137804		363.996		up	124504		526.03		up	23960		564.158		up
139923		183.206		up	135061		532.792		up	27195		235.096		up	28705		367.259		up	139818		536.54		up	152622		594.034		up
155342		183.207		up	21871		535.786		up	25033		236.738		up	61605		380.369		up	136997		564.148		up	137036		615.65		up
150399		183.7		up	109665		550.23		up	135198		237.878		up	21871		384.023		up	141746		581.378		up	66180		621.01		up
135418		185.991		up	135997		550.54		up	79934		239.494		up	145870		410.503		up	140559		588.507		up	29355		629.445		up
90097		187.098		up	73732		581.177		up	141124		245.192		up	142006		411.537		up	23632		596.452		up	23042		638.925		up
135683		188.036		up	22134		589.539		up	134709		248.469		up	27195		432.377		up	147935		598.616		up	140704		657.472		up
136512		188.801		up	165208		611.501		up	141041		287.474		up	27437		450.691		up	107668		625.375		up	28384		729.984		up
26703		189.726		up	136006		611.666		up	26055		307.897		up	136369		462.012		up	145870		631.579		up	145952		741.655		up
24731		191.146		up	164103		641.199		up	109665		310.985		up	73732		511.092		up	61605		652.359		up	139643		754.247		up
160952		193.813		up	139234		652.571		up	72733		339.835		up	124504		556.298		up	141350		685.064		up	22529		827.194		up
135165		194.588		up	27936		657.843		up	27437		340.713		up	24190		576.67		up	68434		694.334		up	74282		841.481		up
28955		197.18		up	140140		679.384		up	152931		357.897		up	152037		636.599		up	24190		777.572		up	141746		886.838		up
22199		197.495		up	125778		688.135		up	27936		362.669		up	139234		655.243		up	22529		789.78		up	23750		908.143		up
26263		197.534		up	22844		729.574		up	139234		385.586		up	92053		687.251		up	153563		935.362		up	91390		944.873		up
27933		199.363		up	102298		829.856		up	23656		386.785		up	23632		763.188		up	138388		1116.19		up	68434		1002.53		up
24730		200.528		up	140092		844.517		up	152037		446.579		up	141124		777.213		up	141870		1214.18		up	153563		1137.52		up
23087		200.975		up	21787		864.88		up	147807		500.678		up	23750		893.882		up	167714		1397.07		up	92053		1170.52		up
135212		201.517		up	27437		890.916		up	22446		612.592		up	164484		920.466		up	18691		1625.5		up	138388		1231.97		up
166519		204.895		up	164484		916.231		up	27937		843.758		up	141870		1081.98		up	23750		1802.02		up	147935		1344.64		up
152448		206.367		up	152037		1079.78		up	23750		929.587		up	18691		1406.11		up	92053		1857.77		up	167714		2763.24		up
17250		206.575		up	141124		1113.55		up	131215	1357413220000	40.304	1357413220000	up	165069		1817.81		up	137932		2494.9		up	137932		4720.46		up
114522		214.691		up

## Sheet: GSE78007-Final with anno
Glucose-Lodgepool		Avicel-Lodgepool		Avicel-Glucose		Aspen-Lodgepool		Aspen-Glucose		Aspen-Avicel			14-3-3 protein
ProteinID	Description	ProteinID	Description	ProteinID	Description	ProteinID	Description	ProteinID	Description	ProteinID	Description		2-nitropropane dioxygenase_ NPD
16887	GroES-related	16887	GroES-related	17825	Cullin homology	17498	Signal transduction response regulator, pH-responsive, PalI/Rim9	16887	GroES-related	16887	GroES-related		2OG-Fe(II) oxygenase
16887	Alcohol dehydrogenase	16887	Alcohol dehydrogenase, zinc-binding	19345	Alpha-L-arabinofuranosidase,	21655	Glucose/ribitol dehydrogenase	16887	Alcohol dehydrogenase, zinc-binding	16887	Alcohol dehydrogenase, zinc-binding		3-hydroxyisobutyrate dehydrogenase-related_ conserved site
16887	Alcohol dehydrogenase	16887	Alcohol dehydrogenase GroES-like	19345	GH catalytic core	21655	Short-chain dehydrogenase/reductase SDR	16887	Alcohol dehydrogenase GroES-like	16887	Alcohol dehydrogenase GroES-like		3-oxoacid CoA-transferase
16887	GroES-like	16887	GroES-like	19493	Ricin B-related lectin	21655	NAD(P)-binding	16887	GroES-like	16887	GroES-like		3-oxoacid CoA-transferase_ subunit A
16887	NAD(P)-binding	16887	NAD(P)-binding	21655	Glucose/ribitol dehydrogenase	21673	Pyridine nucleotide-disulphide oxidoreductase, NAD-binding region	16887	NAD(P)-binding	16887	NAD(P)-binding		3-oxoacid CoA-transferase_ subunit B
17250	Peptidase A1	17250	Peptidase A1	21655	Short-chain dehydrogenase/reductase SDR	21673	FAD-dependent pyridine nucleotide-disulphide oxidoreductase	17250	Peptidase A1	17250	Peptidase A1		5-methyltetrahydropteroyltriglutamate--homocysteine S-methyltransferase
17250	Peptidase aspartic, catalytic	17250	Peptidase aspartic, catalytic	21655	NAD(P)-binding	21673	Pyridine nucleotide-disulphide oxidoreductase, class I	17250	Peptidase aspartic, catalytic	17250	Peptidase aspartic, catalytic		5'-Nucleotidase_ conserved site
17498	Signal transduction response regulator, pH-responsive, PalI/Rim9	17498	Signal transduction response regulator, pH-responsive, PalI/Rim9	21657	Nucleosome assembly protein (NAP)	21787	Protein of unknown function DUF895, eukaryotic	17498	Signal transduction response regulator, pH-responsive, PalI/Rim9	17498	Signal transduction response regulator, pH-responsive, PalI/Rim9		6-phosphogluconate dehydrogenase
17825	Cullin homology	21718	Ribosomal protein L19/L19e	21673	Pyridine nucleotide-disulphide oxidoreductase, NAD-binding region	21787	MFS general substrate transporter	17825	Cullin homology	21718	Ribosomal protein L19/L19e		6-phosphogluconate dehydrogenase_ C-terminal
19345	Alpha-L-arabinofuranosidase,	21787	Protein of unknown function DUF895, eukaryotic	21673	FAD-dependent pyridine nucleotide-disulphide oxidoreductase	21841	Ribosomal protein S14	21673	Pyridine nucleotide-disulphide oxidoreductase, NAD-binding region	21811	Short-chain dehydrogenase/reductase SDR		6-phosphogluconate dehydrogenase_ C-terminal-like
19345	GH catalytic core	21787	MFS general substrate transporter	21673	Pyridine nucleotide-disulphide oxidoreductase, class I	21871	Concanavalin A-like lectin/glucanase	21673	FAD-dependent pyridine nucleotide-disulphide oxidoreductase	21811	Glucose/ribitol dehydrogenase		6-phosphogluconate dehydrogenase_ decarboxylating
21718	Ribosomal protein L19/L19e	21811	Short-chain dehydrogenase/reductase SDR	21720	Cyclin-like F-box	21931	C2 calcium-dependent membrane targeting	21673	Pyridine nucleotide-disulphide oxidoreductase, class I	21811	NAD(P)-binding		6-phosphogluconate dehydrogenase_ NAD-binding
21720	Cyclin-like F-box	21811	Glucose/ribitol dehydrogenase	21787	Protein of unknown function DUF895, eukaryotic	21931	Tricalbin	21718	Ribosomal protein L19/L19e	21841	Ribosomal protein S14		6-phosphogluconate-binding site
21787	Protein of unknown function DUF895, eukaryotic	21811	NAD(P)-binding	21787	MFS general substrate transporter	21931	C2 calcium/lipid-binding region, CaLB	21720	Cyclin-like F-box	21871	Concanavalin A-like lectin/glucanase		AAA ATPase_ conserved site
21787	MFS general substrate transporter	21841	Ribosomal protein S14	21811	Short-chain dehydrogenase/reductase SDR	21998	Ras GTPase	21787	Protein of unknown function DUF895, eukaryotic	22001	Yippee-like protein		AAA ATPase_ core
21841	Ribosomal protein S14	21871	Concanavalin A-like lectin/glucanase	21811	Glucose/ribitol dehydrogenase	21998	Ras	21787	MFS general substrate transporter	22036	6-phosphogluconate dehydrogenase		AAA+ ATPase_ core
21871	Concanavalin A-like lectin/glucanase	22001	Yippee-like protein	21811	NAD(P)-binding	21998	Ras small GTPase, Ras type	21841	Ribosomal protein S14	22036	6-phosphogluconate dehydrogenase,		ABC transporter_ transmembrane region
22036	6-phosphogluconate dehydrogenase	22114	Ribosomal protein S3,	21871	Concanavalin A-like lectin/glucanase	21998	Ras small GTPase, Rho type	21871	Concanavalin A-like lectin/glucanase	22036	6-phosphogluconate dehydrogenase, NAD-binding		ABC transporter_ transmembrane region_ type 1
22036	6-phosphogluconate dehydrogenase,	22114	K Homology, type 2	21998	Ras GTPase	21998	Ras small GTPase, Rab type	21998	Ras GTPase	22036	6-phosphogluconate dehydrogenase, decarboxylating		ABC transporter-like
22036	6-phosphogluconate dehydrogenase, NAD-binding	22114	Ribosomal protein S3	21998	Ras	21998	Ran GTPase	21998	Ras	22036	6-phosphogluconate-binding site		ABC-2 type transporter
22036	6-phosphogluconate dehydrogenase, decarboxylating	22114	K Homology, prokaryotic type	21998	Ras small GTPase, Ras type	21998	Small GTP-binding protein	21998	Ras small GTPase, Ras type	22036	6-phosphogluconate dehydrogenase, -like		AB-hydrolase YheT_ putative
22036	6-phosphogluconate-binding site	22125	Ribosomal protein L15e	21998	Ras small GTPase, Rho type	21998	D-isomer specific 2-hydroxyacid dehydrogenase, NAD-binding	21998	Ras small GTPase, Rho type	22036	NAD(P)-binding		Acetohydroxy acid isomeroreductase_ catalytic
22036	6-phosphogluconate dehydrogenase, -like	22125	Ribosomal protein L23/L15e, core	21998	Ras small GTPase, Rab type	22036	6-phosphogluconate dehydrogenase	21998	Ras small GTPase, Rab type	22114	Ribosomal protein S3,		Actin/actin-like
22036	NAD(P)-binding	22132	Ribosomal protein S24e	21998	Ran GTPase	22036	6-phosphogluconate dehydrogenase,	21998	Ran GTPase	22114	K Homology, type 2		Actin_ conserved site
22114	Ribosomal protein S3,	22155	Isopentenyl-diphosphate delta-isomerase	21998	Small GTP-binding protein	22036	6-phosphogluconate dehydrogenase, NAD-binding	21998	Small GTP-binding protein	22114	Ribosomal protein S3		Actin-binding_ cofilin/tropomyosin type
22114	K Homology, type 2	22155	NUDIX hydrolase, core	21998	D-isomer specific 2-hydroxyacid dehydrogenase, NAD-binding	22036	6-phosphogluconate dehydrogenase, decarboxylating	21998	D-isomer specific 2-hydroxyacid dehydrogenase, NAD-binding	22114	K Homology, prokaryotic type		Acyl carrier protein-like
22114	Ribosomal protein S3	22155	Isopentenyl-diphosphate delta-isomerase, type 1	22001	Yippee-like protein	22036	6-phosphogluconate-binding site	22036	6-phosphogluconate dehydrogenase	22125	Ribosomal protein L15e		Acyl transferase
22114	K Homology, prokaryotic type	22155	NUDIX	22036	6-phosphogluconate dehydrogenase	22036	6-phosphogluconate dehydrogenase, -like	22036	6-phosphogluconate dehydrogenase,	22125	Ribosomal protein L23/L15e, core		Acyl transferase/acyl hydrolase/lysophospholipase
22125	Ribosomal protein L15e	22171	Acetohydroxy acid isomeroreductase, catalytic	22036	6-phosphogluconate dehydrogenase,	22036	NAD(P)-binding	22036	6-phosphogluconate dehydrogenase, NAD-binding	22132	Ribosomal protein S24e		Acyl-CoA dehydrogenase/oxidase C-terminal
22125	Ribosomal protein L23/L15e, core	22171	6-phosphogluconate dehydrogenase, -like	22036	6-phosphogluconate dehydrogenase, NAD-binding	22125	Ribosomal protein L15e	22036	6-phosphogluconate dehydrogenase, decarboxylating	22155	Isopentenyl-diphosphate delta-isomerase		Acyl-CoA dehydrogenase/oxidase_ central region
22132	Ribosomal protein S24e	22171	NAD(P)-binding	22036	6-phosphogluconate dehydrogenase, decarboxylating	22125	Ribosomal protein L23/L15e, core	22036	6-phosphogluconate-binding site	22155	NUDIX hydrolase, core		Acyl-CoA dehydrogenase/oxidase_ middle and N-terminal
22155	Isopentenyl-diphosphate delta-isomerase	22189	Mitochondrial carrier protein	22036	6-phosphogluconate-binding site	22132	Ribosomal protein S24e	22036	6-phosphogluconate dehydrogenase, -like	22155	Isopentenyl-diphosphate delta-isomerase, type 1		Acyl-CoA dehydrogenase_ conserved site
22155	NUDIX hydrolase, core	22189	Adenine nucleotide translocator 1	22036	6-phosphogluconate dehydrogenase, -like	22137	Aldose 1-epimerase	22036	NAD(P)-binding	22155	NUDIX		Acyl-CoA N-acyltransferase
22155	Isopentenyl-diphosphate delta-isomerase, type 1	22189	Mitochondrial substrate carrier	22036	NAD(P)-binding	22137	Glycoside hydrolase-type carbohydrate-binding	22114	Ribosomal protein S3,	22189	Mitochondrial carrier protein		Acyl-CoA oxidase/dehydrogenase_ type 1
22155	NUDIX	22199	Cytochrome b-245, heavy chain	22092	Flavoprotein pyridine nucleotide cytochrome reductase	22171	Acetohydroxy acid isomeroreductase, catalytic	22114	K Homology, type 2	22189	Adenine nucleotide translocator 1		Acyl-CoA-binding protein_ ACBP
22171	Acetohydroxy acid isomeroreductase, catalytic	22199	Ferric reductase-like transmembrane component,	22092	NADH:cytochrome b5 reductase (CBR)	22171	6-phosphogluconate dehydrogenase, -like	22114	Ribosomal protein S3	22189	Mitochondrial substrate carrier		Adenine nucleotide translocator 1
22171	6-phosphogluconate dehydrogenase, -like	22199	FAD-binding 8	22092	Oxidoreductase FAD/NAD(P)-binding	22171	NAD(P)-binding	22114	K Homology, prokaryotic type	22199	Cytochrome b-245, heavy chain		Adenosine/AMP deaminase active site
22171	NAD(P)-binding	22199	Ferric reductase, NAD binding	22092	Oxidoreductase FAD-binding region	22234	Ribosomal protein L13	22125	Ribosomal protein L15e	22199	Ferric reductase-like transmembrane component,		Adenylylsulphate kinase_ C-terminal
22189	Mitochondrial carrier protein	22205	Beta-glucan synthesis-associated, SKN1	22108	Aspartate/other aminotransferase	22234	Ribosomal protein L13	22125	Ribosomal protein L23/L15e, core	22199	FAD-binding 8		ADP-ribosylation factor
22189	Adenine nucleotide translocator 1	22205	Concanavalin A-like lectin/glucanase	22108	Aminotransferase, class I and II	22254	Rare lipoprotein A	22132	Ribosomal protein S24e	22199	Ferric reductase, NAD binding		Alcohol dehydrogenase class III/S-(hydroxymethyl)glutathione dehydrogenase
22189	Mitochondrial substrate carrier	22234	Ribosomal protein L13	22108	Aminotransferases, class-I, pyridoxal-phosphate-binding site	22254	TonB box, conserved site	22155	Isopentenyl-diphosphate delta-isomerase	22205	Beta-glucan synthesis-associated, SKN1		Alcohol dehydrogenase GroES-like
22199	Cytochrome b-245, heavy chain	22234	Ribosomal protein L13	22108	Pyridoxal phosphate-dependent transferase, major region	22254	Barwin-related endoglucanase	22155	NUDIX hydrolase, core	22205	Concanavalin A-like lectin/glucanase		Alcohol dehydrogenase_ zinc-binding
22199	Ferric reductase-like transmembrane component,	22254	Rare lipoprotein A	22163	Glutathione S-transferase,	22332	Putative esterase	22155	Isopentenyl-diphosphate delta-isomerase, type 1	22234	Ribosomal protein L13		Alcohol dehydrogenase_ zinc-containing_ conserved site
22199	FAD-binding 8	22254	TonB box, conserved site	22163	Glutathione S-transferase, -like	22332	S-formylglutathione hydrolase	22155	NUDIX	22234	Ribosomal protein L13		Aldehyde dehydrogenase
22199	Ferric reductase, NAD binding	22254	Barwin-related endoglucanase	22163	Thioredoxin-like fold	22354	Aldo/keto reductase	22163	Glutathione S-transferase,	22254	Rare lipoprotein A		Aldehyde dehydrogenase_ conserved site
22234	Ribosomal protein L13	22288	Histidine acid phosphatase	22199	Cytochrome b-245, heavy chain	22398	Protein synthesis factor, GTP-binding	22163	Glutathione S-transferase, -like	22254	TonB box, conserved site		Aldehyde/histidinol dehydrogenase
22234	Ribosomal protein L13	22303	Succinyl-CoA ligase, alpha subunit	22199	Ferric reductase-like transmembrane component,	22398	Translation elongation factor EFG/EF2,	22163	Thioredoxin-like fold	22254	Barwin-related endoglucanase		Aldo/keto reductase
22288	Histidine acid phosphatase	22303	ATP-citrate lyase/succinyl-CoA ligase	22199	FAD-binding 8	22398	Translation elongation factor EFTu/EF1A,	22171	Acetohydroxy acid isomeroreductase, catalytic	22288	Histidine acid phosphatase		Alkyl hydroperoxide reductase/ Thiol specific antioxidant/ Mal allergen
22398	Protein synthesis factor, GTP-binding	22303	CoA-binding	22199	Ferric reductase, NAD binding	22398	Translation elongation factor EFG/EF2,	22171	6-phosphogluconate dehydrogenase, -like	22303	Succinyl-CoA ligase, alpha subunit		Alpha tubulin
22398	Translation elongation factor EFG/EF2,	22303	ATP-citrate lyase/succinyl-CoA ligase, active site	22234	Ribosomal protein L13	22398	Small GTP-binding protein	22171	NAD(P)-binding	22303	ATP-citrate lyase/succinyl-CoA ligase		Alpha/beta hydrolase
22398	Translation elongation factor EFTu/EF1A,	22303	NAD(P)-binding	22234	Ribosomal protein L13	22398	Translation elongation and initiation factors/Ribosomal, beta-barrel	22189	Mitochondrial carrier protein	22303	CoA-binding		Alpha/beta hydrolase fold-1
22398	Translation elongation factor EFG/EF2,	22303	Succinyl-CoA synthetase-like	22235	Phosphopantetheine-binding	22398	Elongation factor G, III and V	22189	Adenine nucleotide translocator 1	22303	ATP-citrate lyase/succinyl-CoA ligase, active site		Alpha-1_2-mannosidase_ putative
22398	Small GTP-binding protein	22439	Chitin synthase	22235	Acyl carrier protein (ACP)	22456	Calreticulin/calnexin	22189	Mitochondrial substrate carrier	22303	NAD(P)-binding		Alpha-amylase_ domain of unknown function DUF1966_ C-terminal
22398	Translation elongation and initiation factors/Ribosomal, beta-barrel	22439	Chitin synthase	22235	Phosphopantetheine attachment site	22456	Concanavalin A-like lectin/glucanase	22199	Cytochrome b-245, heavy chain	22303	Succinyl-CoA synthetase-like		Alpha-amylase_ fungi
22398	Elongation factor G, III and V	22472	WD40 repeat	22235	Acyl carrier protein-like	22456	Calreticulin/calnexin, P	22199	Ferric reductase-like transmembrane component,	22305	Cell division/GTP binding protein		Alpha-D-phosphohexomutase_ alpha/beta/alpha domain I
22456	Calreticulin/calnexin	22472	G-protein, beta subunit	22254	Rare lipoprotein A	22508	Cytochrome P450, E-class, group I	22199	FAD-binding 8	22305	Septin		Alpha-D-phosphohexomutase_ alpha/beta/alpha domain II
22456	Concanavalin A-like lectin/glucanase	22472	Guanine nucleotide-binding protein, beta subunit	22254	TonB box, conserved site	22508	Cytochrome P450	22199	Ferric reductase, NAD binding	22439	Chitin synthase		Alpha-D-phosphohexomutase_ alpha/beta/alpha domain III
22456	Calreticulin/calnexin, P	22472	WD40 repeat-like	22254	Barwin-related endoglucanase	22518	Endoribonuclease L-PSP	22234	Ribosomal protein L13	22439	Chitin synthase		Alpha-D-phosphohexomutase_ alpha/beta/alpha I_ II and III
22476	Proteasome component region PCI	22508	Cytochrome P450, E-class, group I	22303	Succinyl-CoA ligase, alpha subunit	22518	YjgF-like protein	22234	Ribosomal protein L13	22440	Protein kinase, core		Alpha-D-phosphohexomutase_ conserved site
22476	PCI/PINT associated module	22508	Cytochrome P450	22303	ATP-citrate lyase/succinyl-CoA ligase	22518	Endoribonuclease L-PSP/chorismate mutase-like	22254	Rare lipoprotein A	22440	Serine/threonine protein kinase-related		Alpha-D-phosphohexomutase_ C-terminal
22487	Glutaredoxin subgroup	22529	Peptidase A1	22303	CoA-binding	22529	Peptidase A1	22254	TonB box, conserved site	22440	Tyrosine protein kinase		Alpha-D-phosphohexomutase_ N-terminal
22487	Glutaredoxin	22529	Peptidase aspartic, active site	22303	ATP-citrate lyase/succinyl-CoA ligase, active site	22529	Peptidase aspartic, active site	22254	Barwin-related endoglucanase	22440	Serine/threonine protein kinase		Alpha-hydroxy acid dehydrogenase_ FMN-dependent
22487	Glutaredoxin, eukaryotic and viruses	22529	Peptidase aspartic, catalytic	22303	NAD(P)-binding	22529	Peptidase aspartic, catalytic	22288	Histidine acid phosphatase	22440	Protein kinase ATP binding, conserved site		Alpha-L-arabinofuranosidase_ C-terminal
22487	Glutaredoxin active site	22757	Lysophospholipase, catalytic region	22303	Succinyl-CoA synthetase-like	22575	6-phosphogluconate dehydrogenase, NAD-binding	22332	Putative esterase	22440	Serine/threonine protein kinase, active site		Alternative oxidase
22487	Thioredoxin-like fold	22757	Acyl transferase/acyl hydrolase/lysophospholipase	22332	Putative esterase	22575	Helix-turn-helix, AraC type	22332	S-formylglutathione hydrolase	22440	Protein kinase-like		Amidase signature enzyme
22508	Cytochrome P450, E-class, group I	22759	Cell division/GTP binding protein	22332	S-formylglutathione hydrolase	22575	3-hydroxyisobutyrate dehydrogenase-related, conserved site	22398	Protein synthesis factor, GTP-binding	22456	Calreticulin/calnexin		Amidase_ fungi type
22508	Cytochrome P450	22759	Septin	22338	Double-stranded RNA binding	22575	6-phosphogluconate dehydrogenase, -like	22398	Translation elongation factor EFG/EF2,	22456	Concanavalin A-like lectin/glucanase		Amidohydrolase 3
22529	Peptidase A1	22804	Carboxylesterase, type B	22338	Ribonuclease III	22575	NAD(P)-binding	22398	Translation elongation factor EFTu/EF1A,	22456	Calreticulin/calnexin, P		Amino acid permease_ conserved site
22529	Peptidase aspartic, active site	22804	Lipase, GDXG, active site	22398	Protein synthesis factor, GTP-binding	22675	Enolase	22398	Translation elongation factor EFG/EF2,	22472	WD40 repeat		Amino acid permease-associated region
22529	Peptidase aspartic, catalytic	22838	G-protein, gamma-like subunit	22398	Translation elongation factor EFG/EF2,	22711	Heat shock protein Hsp20	22398	Small GTP-binding protein	22472	G-protein, beta subunit		Amino acid transporter_ transmembrane
22675	Enolase	22838	G-protein, gamma subunit	22398	Translation elongation factor EFTu/EF1A,	22711	HSP20-like chaperone	22398	Translation elongation and initiation factors/Ribosomal, beta-barrel	22472	Guanine nucleotide-binding protein, beta subunit		Amino acid/polyamine transporter I
22711	Heat shock protein Hsp20	22844	Cytochrome P450	22398	Translation elongation factor EFG/EF2,	22804	Carboxylesterase, type B	22398	Elongation factor G, III and V	22472	WD40 repeat-like		Aminoacyl-tRNA synthetase_ class I_ conserved site
22711	HSP20-like chaperone	22844	Cytochrome P450, E-class, group I	22398	Small GTP-binding protein	22804	Lipase, GDXG, active site	22456	Calreticulin/calnexin	22482	Basic helix-loop-helix dimerisation region bHLH		Aminotransferase_ class I and II
22757	Lysophospholipase, catalytic region	22851	Plastocyanin-like	22398	Translation elongation and initiation factors/Ribosomal, beta-barrel	22828	ATPase, F1/V1/A1 complex, alpha/beta subunit, nucleotide-binding	22456	Concanavalin A-like lectin/glucanase	22482	Helix-loop-helix DNA-binding		Aminotransferase_ class IV
22757	Acyl transferase/acyl hydrolase/lysophospholipase	22851	Cupredoxin	22398	Elongation factor G, III and V	22828	ATPase, F1/V1/A1 complex, alpha/beta subunit,	22456	Calreticulin/calnexin, P	22529	Peptidase A1		Aminotransferase_ class-II_ pyridoxal-phosphate binding site
22804	Carboxylesterase, type B	22897	SKP1 component, dimerisation	22421	Inorganic pyrophosphatase	22828	ATPase, F1/V1/A1 complex, alpha/beta subunit,	22472	WD40 repeat	22529	Peptidase aspartic, active site		Aminotransferases_ class-I_ pyridoxal-phosphate-binding site
22804	Lipase, GDXG, active site	22897	SKP1 component, POZ	22456	Calreticulin/calnexin	22828	AAA+ ATPase, core	22472	G-protein, beta subunit	22529	Peptidase aspartic, catalytic		Ammonium transporter
22844	Cytochrome P450	22897	E3 ubiquitin ligase, SCF complex, Skp subunit	22456	Concanavalin A-like lectin/glucanase	22828	ATPase, F1 complex, beta subunit	22472	Guanine nucleotide-binding protein, beta subunit	22675	Enolase		AMP-dependent synthetase and ligase
22844	Cytochrome P450, E-class, group I	22897	SKP1 component	22456	Calreticulin/calnexin, P	22844	Cytochrome P450	22472	WD40 repeat-like	22711	Heat shock protein Hsp20		Ankyrin
22851	Plastocyanin-like	22897	BTB/POZ fold	22476	Proteasome component region PCI	22844	Cytochrome P450, E-class, group I	22476	Proteasome component region PCI	22711	HSP20-like chaperone		Aquaporin
22851	Cupredoxin	23035	Rhodopsin, bacterial	22476	PCI/PINT associated module	22851	Plastocyanin-like	22476	PCI/PINT associated module	22757	Lysophospholipase, catalytic region		ARF/SAR superfamily
22897	SKP1 component, dimerisation	23042	Cerato-platanin	22482	Basic helix-loop-helix dimerisation region bHLH	22851	Cupredoxin	22487	Glutaredoxin subgroup	22757	Acyl transferase/acyl hydrolase/lysophospholipase		ArgE/DapE/ACY1/CPG2/YscS_ conserved site
22897	SKP1 component, POZ	23044	Heat shock protein Hsp90	22482	Helix-loop-helix DNA-binding	22855	Aldo/keto reductase	22487	Glutaredoxin	22759	Cell division/GTP binding protein		Armadillo-type fold
22897	E3 ubiquitin ligase, SCF complex, Skp subunit	23044	ATP-binding region, ATPase-like	22487	Glutaredoxin subgroup	22897	SKP1 component, dimerisation	22487	Glutaredoxin, eukaryotic and viruses	22759	Septin		Aromatic-ring hydroxylase
22897	SKP1 component	23093	Carboxylesterase, type B	22487	Glutaredoxin	22897	SKP1 component, POZ	22487	Glutaredoxin active site	22838	G-protein, gamma-like subunit		Aspartate/ornithine carbamoyltransferase
22897	BTB/POZ fold	23102	Aspartate/other aminotransferase	22487	Glutaredoxin, eukaryotic and viruses	22897	E3 ubiquitin ligase, SCF complex, Skp subunit	22487	Thioredoxin-like fold	22838	G-protein, gamma subunit		Aspartate/other aminotransferase
23035	Rhodopsin, bacterial	23102	Aminotransferase, class I and II	22487	Glutaredoxin active site	22897	SKP1 component	22508	Cytochrome P450, E-class, group I	22897	SKP1 component, dimerisation		ATPase_ P-type cation-transporter_ C-terminal
23042	Cerato-platanin	23102	Aminotransferases, class-I, pyridoxal-phosphate-binding site	22487	Thioredoxin-like fold	22897	BTB/POZ fold	22508	Cytochrome P450	22897	SKP1 component, POZ		ATPase_ P-type cation-transporter_ N-terminal
23044	Heat shock protein Hsp90	23102	Pyridoxal phosphate-dependent transferase, major region	22508	Cytochrome P450, E-class, group I	22977	Inositol phosphatase/fructose-1,6-bisphosphatase	22518	Endoribonuclease L-PSP	22897	E3 ubiquitin ligase, SCF complex, Skp subunit		ATPase_ P-type_ K/Mg/Cd/Cu/Zn/Na/Ca/Na/H-transporter
23044	ATP-binding region, ATPase-like	23103	Zinc finger, AN1-type	22508	Cytochrome P450	23042	Cerato-platanin	22518	YjgF-like protein	22897	SKP1 component		ATP-binding region_ ATPase-like
23103	Zinc finger, AN1-type	23120	Coenzyme A transferase	22518	Endoribonuclease L-PSP	23044	Heat shock protein Hsp90	22518	Endoribonuclease L-PSP/chorismate mutase-like	22897	BTB/POZ fold		ATP-citrate lyase/succinyl-CoA ligase
23120	Coenzyme A transferase	23120	3-oxoacid CoA-transferase	22518	YjgF-like protein	23044	ATP-binding region, ATPase-like	22529	Peptidase A1	23035	Rhodopsin, bacterial		ATP-citrate lyase/succinyl-CoA ligase_ active site
23120	3-oxoacid CoA-transferase	23120	3-oxoacid CoA-transferase,	22518	Endoribonuclease L-PSP/chorismate mutase-like	23103	Zinc finger, AN1-type	22529	Peptidase aspartic, active site	23044	Heat shock protein Hsp90		ATP-grasp fold
23120	3-oxoacid CoA-transferase,	23120	3-oxoacid CoA-transferase,	22575	6-phosphogluconate dehydrogenase, NAD-binding	23104	Syntaxin,	22529	Peptidase aspartic, catalytic	23044	ATP-binding region, ATPase-like		ATP-sulphurylase
23120	3-oxoacid CoA-transferase,	23126	Heat shock protein 70	22575	Helix-turn-helix, AraC type	23104	Target SNARE coiled-coil region	22575	6-phosphogluconate dehydrogenase, NAD-binding	23048	GH13, catalytic region		AT-rich interaction region
23126	Heat shock protein 70	23126	Heat shock protein Hsp70	22575	3-hydroxyisobutyrate dehydrogenase-related, conserved site	23104	t-SNARE	22575	Helix-turn-helix, AraC type	23048	Glycosyl transferase, group 1		Bacterial alpha-L-rhamnosidase
23126	Heat shock protein Hsp70	23195	Calcium-binding EF-hand	22575	6-phosphogluconate dehydrogenase, -like	23120	Coenzyme A transferase	22575	3-hydroxyisobutyrate dehydrogenase-related, conserved site	23048	Starch synthase catalytic region		Bacterial regulatory protein_ LuxR
23149	Ras GTPase	23247	Light chain 3 (LC3)	22575	NAD(P)-binding	23120	3-oxoacid CoA-transferase	22575	6-phosphogluconate dehydrogenase, -like	23048	GH13, subfamily, catalytic region		Barwin-related endoglucanase
23149	Ran GTPase	23280	Pyridoxal phosphate-dependent decarboxylase	22622	Ribosomal protein L28e	23120	3-oxoacid CoA-transferase,	22575	NAD(P)-binding	23048	GH catalytic core		Basic helix-loop-helix dimerisation region bHLH
23149	Ras	23280	Glutamate decarboxylase	22657	FMN-binding split barrel, related	23120	3-oxoacid CoA-transferase,	22622	Ribosomal protein L28e	23093	Carboxylesterase, type B		Basic-leucine zipper (bZIP) transcription factor
23149	Ras small GTPase, Ras type	23280	Pyridoxal phosphate-dependent transferase, major region	22675	Enolase	23126	Heat shock protein 70	22675	Enolase	23102	Aspartate/other aminotransferase		BCS1 N terminal
23149	Ras small GTPase, Rho type	23310	Short-chain dehydrogenase/reductase SDR	22711	Heat shock protein Hsp20	23126	Heat shock protein Hsp70	22711	Heat shock protein Hsp20	23102	Aminotransferase, class I and II		Beta tubulin
23149	Ras small GTPase, Rab type	23310	Glucose/ribitol dehydrogenase	22711	HSP20-like chaperone	23190	Ras GTPase	22711	HSP20-like chaperone	23102	Aminotransferases, class-I, pyridoxal-phosphate-binding site		Beta tubulin_ autoregulation binding site
23149	Small GTP-binding protein	23310	NAD(P)-binding	22732	Flavoprotein pyridine nucleotide cytochrome reductase	23190	Ras	22732	Flavoprotein pyridine nucleotide cytochrome reductase	23102	Pyridoxal phosphate-dependent transferase, major region		Beta-glucan synthesis-associated_ SKN1
23190	Ras GTPase	23400	Glycosyl transferase, group 1	22732	NADH:cytochrome b5 reductase (CBR)	23190	Ras small GTPase, Ras type	22732	NADH:cytochrome b5 reductase (CBR)	23103	Zinc finger, AN1-type		Beta-ketoacyl synthase_ C-terminal
23190	Ras	23456	Cerato-platanin	22732	Oxidoreductase FAD/NAD(P)-binding	23190	Ras small GTPase, Rho type	22732	Oxidoreductase FAD/NAD(P)-binding	23104	Syntaxin,		Beta-ketoacyl synthase_ N-terminal
23190	Ras small GTPase, Ras type	23619	Isocitrate lyase and phosphorylmutase, core	22732	Oxidoreductase FAD-binding region	23190	Ras small GTPase, Rab type	22732	Oxidoreductase FAD-binding region	23104	Target SNARE coiled-coil region		Beta-lactamase-like
23190	Ras small GTPase, Rho type	23619	Isocitrate lyase and phosphorylmutase	22759	Cell division/GTP binding protein	23190	Ran GTPase	22757	Lysophospholipase, catalytic region	23104	t-SNARE		Beta-N-acetylhexosaminidase-like
23190	Ras small GTPase, Rab type	23619	Isocitrate lyase	22759	Septin	23190	Small GTP-binding protein	22757	Acyl transferase/acyl hydrolase/lysophospholipase	23120	Coenzyme A transferase		Bicupin_ oxalate decarboxylase/oxidase
23190	Ran GTPase	23619	Pyruvate/Phosphoenolpyruvate kinase, catalytic core	22792	Aminotransferase, class V/Cysteine desulphurase	23190	RNA polymerase sigma factor 54, interaction	22804	Carboxylesterase, type B	23120	3-oxoacid CoA-transferase		Biotin carboxylase_ C-terminal
23190	Small GTP-binding protein	23656	bZIP transcription factor, bZIP-1	22792	Cysteine desulphurase	23280	Pyridoxal phosphate-dependent decarboxylase	22804	Lipase, GDXG, active site	23120	3-oxoacid CoA-transferase,		Biotin carboxylation region
23190	RNA polymerase sigma factor 54, interaction	23656	Basic-leucine zipper (bZIP) transcription factor	22792	Pyridoxal phosphate-dependent transferase, major region	23280	Glutamate decarboxylase	22824	Sodium/calcium exchanger membrane region	23120	3-oxoacid CoA-transferase,		Biotin/lipoyl attachment
23195	Calcium-binding EF-hand	23669	Carbohydrate-binding family V/XII	22824	Sodium/calcium exchanger membrane region	23280	Pyridoxal phosphate-dependent transferase, major region	22824	Calcium/proton exchanger superfamily	23126	Heat shock protein 70		Biotin-binding site
23247	Light chain 3 (LC3)	23669	Protein of unknown function DM9	22824	Calcium/proton exchanger superfamily	23309	Nucleoside diphosphate kinase, core	22824	Calcium/proton exchanger	23126	Heat shock protein Hsp70		Branched-chain amino acid aminotransferase II
23309	Nucleoside diphosphate kinase, core	23699	Porin, eukaryotic type	22824	Calcium/proton exchanger	23310	Short-chain dehydrogenase/reductase SDR	22844	Cytochrome P450	23195	Calcium-binding EF-hand		BTB/POZ fold
23310	Short-chain dehydrogenase/reductase SDR	23700	Major intrinsic protein	22844	Cytochrome P450	23310	Glucose/ribitol dehydrogenase	22844	Cytochrome P450, E-class, group I	23247	Light chain 3 (LC3)		BTB/POZ-like
23310	Glucose/ribitol dehydrogenase	23700	Aquaporin	22844	Cytochrome P450, E-class, group I	23310	NAD(P)-binding	22851	Plastocyanin-like	23309	Nucleoside diphosphate kinase, core		bZIP transcription factor_ bZIP-1
23310	NAD(P)-binding	23705	Actin-binding, cofilin/tropomyosin type	22851	Plastocyanin-like	23323	Heat shock protein 70	22851	Cupredoxin	23310	Short-chain dehydrogenase/reductase SDR		C4-dicarboxylate transporter/malic acid transport protein
23323	Heat shock protein 70	23755	Glucose/ribitol dehydrogenase	22851	Cupredoxin	23323	Heat shock protein Hsp70	22897	SKP1 component, dimerisation	23310	Glucose/ribitol dehydrogenase		Calcium/proton exchanger
23323	Heat shock protein Hsp70	23755	Short-chain dehydrogenase/reductase SDR	22855	Aldo/keto reductase	23456	Cerato-platanin	22897	SKP1 component, POZ	23310	NAD(P)-binding		Calcium/proton exchanger superfamily
23400	Glycosyl transferase, group 1	23755	NAD(P)-binding	22897	SKP1 component, dimerisation	23550	Phosphoglycerate kinase	22897	E3 ubiquitin ligase, SCF complex, Skp subunit	23400	Glycosyl transferase, group 1		Calcium-binding EF-hand
23669	Carbohydrate-binding family V/XII	23928	ABC transporter-like	22897	SKP1 component, POZ	23550	Phosphoglycerate kinase, conserved site	22897	SKP1 component	23456	Cerato-platanin		Calcium-translocating P-type ATPase_ PMCA-type
23669	Protein of unknown function DM9	23928	ABC transporter, transmembrane region	22897	E3 ubiquitin ligase, SCF complex, Skp subunit	23559	GH3,	22897	BTB/POZ fold	23619	Isocitrate lyase and phosphorylmutase, core		Calreticulin/calnexin
23699	Porin, eukaryotic type	23928	AAA+ ATPase, core	22897	SKP1 component	23559	GH3,	23035	Rhodopsin, bacterial	23619	Isocitrate lyase and phosphorylmutase		Calreticulin/calnexin_ P
23705	Actin-binding, cofilin/tropomyosin type	23928	ABC transporter, transmembrane region, type 1	22897	BTB/POZ fold	23559	PA14	23042	Cerato-platanin	23619	Isocitrate lyase		Calycin-like
23785	Ribosomal protein L22/L17	23960	Endoribonuclease L-PSP	23013	RNA recognition motif, RNP-1	23559	GH catalytic core	23044	Heat shock protein Hsp90	23619	Pyruvate/Phosphoenolpyruvate kinase, catalytic core		cAMP-regulated phosphoprotein/endosulphine conserved region
23785	Ribosomal protein L22/L17	23960	YjgF-like protein	23013	Polyadenylate-binding protein/Hyperplastic disc protein	23631	Histone H3	23044	ATP-binding region, ATPase-like	23631	Histone H3		Carbamoyl phosphate synthase_ large subunit_ N-terminal
23928	ABC transporter-like	23960	Endoribonuclease L-PSP/chorismate mutase-like	23013	RNA recognition, region 1	23631	Histone core	23048	GH13, catalytic region	23631	Histone core		Carbamoyl phosphate synthetase_ large subunit_ ATP-binding
23928	ABC transporter, transmembrane region	23963	Thiamine pyrophosphate enzyme, region	23013	Polyadenylate binding protein, human types 1, 2, 3, 4	23631	Histone-fold	23048	Glycosyl transferase, group 1	23631	Histone-fold		Carbohydrate kinase_ FGGY
23928	AAA+ ATPase, core	23963	Thiamine pyrophosphate enzyme, TPP-binding	23028	Oxidoreductase,	23656	bZIP transcription factor, bZIP-1	23048	Starch synthase catalytic region	23699	Porin, eukaryotic type		Carbohydrate/puine kinase_ PfkB_ conserved site
23928	ABC transporter, transmembrane region, type 1	23963	Thiamine pyrophosphate enzyme, TPP binding region	23028	Oxidoreductase putative,	23656	Basic-leucine zipper (bZIP) transcription factor	23048	GH13, subfamily, catalytic region	23746	Iron-containing alcohol dehydrogenase		Carbohydrate-binding family V/XII
23960	Endoribonuclease L-PSP	23963	Pyruvate decarboxylase/indolepyruvate decarboxylase	23028	NAD(P)-binding	23669	Carbohydrate-binding family V/XII	23048	GH catalytic core	23746	Glycerol dehydrogenase		Carbohydrate-binding WSC
23960	YjgF-like protein	24032	Ribosomal protein L25/L23	23035	Rhodopsin, bacterial	23669	Protein of unknown function DM9	23120	Coenzyme A transferase	23746	Aldehyde dehydrogenase, conserved site		Carbohydrate-binding WSC_ subgroup
23960	Endoribonuclease L-PSP/chorismate mutase-like	24032	Ribosomal protein L23/L25,	23042	Cerato-platanin	23700	Major intrinsic protein	23120	3-oxoacid CoA-transferase	23928	ABC transporter-like		Carboxylesterase_ type B
23963	Thiamine pyrophosphate enzyme, region	24032	Ribosomal protein L23, conserved site	23102	Aspartate/other aminotransferase	23700	Aquaporin	23120	3-oxoacid CoA-transferase,	23928	ABC transporter, transmembrane region		Carboxymuconolactone decarboxylase
23963	Thiamine pyrophosphate enzyme, TPP-binding	24032	Ribosomal protein L23/L15e, core	23102	Aminotransferase, class I and II	23705	Actin-binding, cofilin/tropomyosin type	23120	3-oxoacid CoA-transferase,	23928	AAA+ ATPase, core		Catechol dioxygenase_ N-terminal
23963	Thiamine pyrophosphate enzyme, TPP binding region	24056	GH20	23102	Aminotransferases, class-I, pyridoxal-phosphate-binding site	23746	Iron-containing alcohol dehydrogenase	23126	Heat shock protein 70	23928	ABC transporter, transmembrane region, type 1		CDR ABC transporter
23963	Pyruvate decarboxylase/indolepyruvate decarboxylase	24056	GH20, catalytic core	23102	Pyridoxal phosphate-dependent transferase, major region	23746	Glycerol dehydrogenase	23126	Heat shock protein Hsp70	23952	Cytochrome P450		Cell division/GTP binding protein
23966	GH30	24056	Beta-N-acetylhexosaminidase-like	23103	Zinc finger, AN1-type	23746	Aldehyde dehydrogenase, conserved site	23149	Ras GTPase	23960	Endoribonuclease L-PSP		Cerato-platanin
23966	GH catalytic core	24056	GH catalytic core	23120	Coenzyme A transferase	23755	Glucose/ribitol dehydrogenase	23149	Ran GTPase	23960	YjgF-like protein		Chitin synthase
24032	Ribosomal protein L25/L23	24176	Cytochrome P450	23120	3-oxoacid CoA-transferase	23755	Short-chain dehydrogenase/reductase SDR	23149	Ras	23960	Endoribonuclease L-PSP/chorismate mutase-like		Chitin synthase N-terminal
24032	Ribosomal protein L23/L25,	24176	Cytochrome P450, E-class, group I	23120	3-oxoacid CoA-transferase,	23755	NAD(P)-binding	23149	Ras small GTPase, Ras type	23963	Thiamine pyrophosphate enzyme, region		Chitin-binding_ type 1
24032	Ribosomal protein L23, conserved site	24190	GH12	23120	3-oxoacid CoA-transferase,	23821	GH31	23149	Ras small GTPase, Rho type	23963	Thiamine pyrophosphate enzyme, TPP-binding		Chloroperoxidase
24032	Ribosomal protein L23/L15e, core	24190	Concanavalin A-like lectin/glucanase	23149	Ras GTPase	23928	ABC transporter-like	23149	Ras small GTPase, Rab type	23963	Thiamine pyrophosphate enzyme, TPP binding region		Chromo domain
24056	GH20	24207	Ribosomal protein L1	23149	Ran GTPase	23928	ABC transporter, transmembrane region	23149	Small GTP-binding protein	23963	Pyruvate decarboxylase/indolepyruvate decarboxylase		Chromo domain-like
24056	GH20, catalytic core	24289	Short-chain dehydrogenase/reductase SDR	23149	Ras	23928	AAA+ ATPase, core	23247	Light chain 3 (LC3)	23966	GH30		CoA-binding
24056	Beta-N-acetylhexosaminidase-like	24289	Glucose/ribitol dehydrogenase	23149	Ras small GTPase, Ras type	23928	ABC transporter, transmembrane region, type 1	23280	Pyridoxal phosphate-dependent decarboxylase	23966	GH catalytic core		Cobalamin (vitamin B12)-independent methionine synthase MetE_ N-terminal
24056	GH catalytic core	24289	NAD(P)-binding	23149	Ras small GTPase, Rho type	23966	GH30	23280	Glutamate decarboxylase	24190	GH12		Coenzyme A transferase
24176	Cytochrome P450	24346	14-3-3 protein	23149	Ras small GTPase, Rab type	23966	GH catalytic core	23280	Pyridoxal phosphate-dependent transferase, major region	24190	Concanavalin A-like lectin/glucanase		Complex 1 LYR protein
24176	Cytochrome P450, E-class, group I	24430	Peptidase A1	23149	Small GTP-binding protein	24032	Ribosomal protein L25/L23	23309	Nucleoside diphosphate kinase, core	24207	Ribosomal protein L1		Concanavalin A-like lectin/glucanase
24190	GH12	24430	Peptidase aspartic, active site	23190	Ras GTPase	24032	Ribosomal protein L23/L25,	23310	Short-chain dehydrogenase/reductase SDR	24289	Short-chain dehydrogenase/reductase SDR		Conserved carboxylase region
24190	Concanavalin A-like lectin/glucanase	24430	Peptidase aspartic, catalytic	23190	Ras	24032	Ribosomal protein L23, conserved site	23310	Glucose/ribitol dehydrogenase	24289	Glucose/ribitol dehydrogenase		Conserved hypothetical protein CHP02231
24207	Ribosomal protein L1	24436	Ribosomal protein L18/L5	23190	Ras small GTPase, Ras type	24032	Ribosomal protein L23/L15e, core	23310	NAD(P)-binding	24289	NAD(P)-binding		Crotonase_ core
24346	14-3-3 protein	24436	Ribosomal protein L5, eukaryotic	23190	Ras small GTPase, Rho type	24056	GH20	23400	Glycosyl transferase, group 1	24430	Peptidase A1		CS
24430	Peptidase A1	24486	Ribosomal protein L6E	23190	Ras small GTPase, Rab type	24056	GH20, catalytic core	23550	Phosphoglycerate kinase	24430	Peptidase aspartic, active site		CS domain
24430	Peptidase aspartic, active site	24493	Methionine synthase, vitamin-B12 independent	23190	Ran GTPase	24056	Beta-N-acetylhexosaminidase-like	23550	Phosphoglycerate kinase, conserved site	24430	Peptidase aspartic, catalytic		Cullin homology
24430	Peptidase aspartic, catalytic	24493	Cobalamin (vitamin B12)-independent methionine synthase MetE,	23190	Small GTP-binding protein	24056	GH catalytic core	23631	Histone H3	24436	Ribosomal protein L18/L5		Cupin 1
24436	Ribosomal protein L18/L5	24493	5-methyltetrahydropteroyltriglutamate--homocysteine S-methyltransferase	23190	RNA polymerase sigma factor 54, interaction	24176	Cytochrome P450	23631	Histone core	24436	Ribosomal protein L5, eukaryotic		Cupin 2_ conserved barrel
24436	Ribosomal protein L5, eukaryotic	24496	Ribosomal protein L6	23195	Calcium-binding EF-hand	24176	Cytochrome P450, E-class, group I	23631	Histone-fold	24440	Ribonuclease II and R		Cupin_ RmlC-type
24486	Ribosomal protein L6E	24551	Ribosomal protein S3Ae	23247	Light chain 3 (LC3)	24177	Cytochrome P450	23656	bZIP transcription factor, bZIP-1	24486	Ribosomal protein L6E		Cupredoxin
24493	Methionine synthase, vitamin-B12 independent	24593	Iron-containing alcohol dehydrogenase	23280	Pyridoxal phosphate-dependent decarboxylase	24177	Cytochrome P450, E-class, group I	23656	Basic-leucine zipper (bZIP) transcription factor	24493	Methionine synthase, vitamin-B12 independent		Cyanamide hydratase_ HD-type
24493	Cobalamin (vitamin B12)-independent methionine synthase MetE,	24664	Alcohol dehydrogenase, zinc-binding	23280	Glutamate decarboxylase	24207	Ribosomal protein L1	23669	Carbohydrate-binding family V/XII	24493	Cobalamin (vitamin B12)-independent methionine synthase MetE,		Cyclin-like F-box
24493	5-methyltetrahydropteroyltriglutamate--homocysteine S-methyltransferase	24664	Alcohol dehydrogenase GroES-like	23280	Pyridoxal phosphate-dependent transferase, major region	24273	Aldehyde dehydrogenase	23669	Protein of unknown function DM9	24493	5-methyltetrahydropteroyltriglutamate--homocysteine S-methyltransferase		Cytochrome b-245_ heavy chain
24496	Ribosomal protein L6	24664	Alcohol dehydrogenase class III/S-(hydroxymethyl)glutathione dehydrogenase	23309	Nucleoside diphosphate kinase, core	24273	Delta-1-pyrroline-5-carboxylate dehydrogenase 1	23699	Porin, eukaryotic type	24551	Ribosomal protein S3Ae		Cytochrome b5
24551	Ribosomal protein S3Ae	24664	Alcohol dehydrogenase, zinc-containing, conserved site	23400	Glycosyl transferase, group 1	24273	Aldehyde dehydrogenase, conserved site	23705	Actin-binding, cofilin/tropomyosin type	24593	Iron-containing alcohol dehydrogenase		Cytochrome c and b562
24593	Iron-containing alcohol dehydrogenase	24664	GroES-like	23456	Cerato-platanin	24273	Aldehyde/histidinol dehydrogenase	23746	Iron-containing alcohol dehydrogenase	24698	Aminotransferase, class I and II		Cytochrome c_ class I
24698	Aminotransferase, class I and II	24664	NAD(P)-binding	23460	Adenylate/cytidine kinase,	24330	Isocitrate/isopropylmalate dehydrogenase	23746	Glycerol dehydrogenase	24698	Tetrapyrrole biosynthesis, 5-aminolevulinic acid synthase		Cytochrome c_ class IA/ IB
24698	Tetrapyrrole biosynthesis, 5-aminolevulinic acid synthase	24698	Aminotransferase, class I and II	23460	Adenylate kinase	24330	3-isopropylmalate dehydrogenase	23746	Aldehyde dehydrogenase, conserved site	24698	Aminotransferase, class-II, pyridoxal-phosphate binding site		Cytochrome c_ monohaem
24698	Aminotransferase, class-II, pyridoxal-phosphate binding site	24698	Tetrapyrrole biosynthesis, 5-aminolevulinic acid synthase	23460	Adenylate kinase, zinc-finger lid region	24346	14-3-3 protein	23785	Ribosomal protein L22/L17	24698	Pyridoxal phosphate-dependent transferase, major region		Cytochrome P450
24698	Pyridoxal phosphate-dependent transferase, major region	24698	Aminotransferase, class-II, pyridoxal-phosphate binding site	23460	Adenylate kinase, subfamily	24361	Fumarylacetoacetase, -like	23785	Ribosomal protein L22/L17	24730	RNA recognition motif, RNP-1		Cytochrome P450_ E-class_ group I
24730	RNA recognition motif, RNP-1	24698	Pyridoxal phosphate-dependent transferase, major region	23550	Phosphoglycerate kinase	24361	Fumarylacetoacetase, -related	23928	ABC transporter-like	24731	GH catalytic core		Cytochrome P450_ E-class_ group IV
24731	GH catalytic core	24730	RNA recognition motif, RNP-1	23550	Phosphoglycerate kinase, conserved site	24436	Ribosomal protein L18/L5	23928	ABC transporter, transmembrane region	24769	Globin-like		Delta-1-pyrroline-5-carboxylate dehydrogenase 1
24771	Tubulin	24731	GH catalytic core	23609	Fungal transcriptional regulatory protein,	24436	Ribosomal protein L5, eukaryotic	23928	AAA+ ATPase, core	24771	Tubulin		Di-copper centre-containing
24771	Alpha tubulin	24769	Globin-like	23609	Fungal specific transcription factor	24486	Ribosomal protein L6E	23928	ABC transporter, transmembrane region, type 1	24771	Alpha tubulin		Dienelactone hydrolase
24771	Tubulin/FtsZ, GTPase	24771	Tubulin	23619	Isocitrate lyase and phosphorylmutase, core	24495	GroES-related	23960	Endoribonuclease L-PSP	24771	Tubulin/FtsZ, GTPase		Dihydrodipicolinate synthetase
24771	Tubulin/FtsZ,	24771	Alpha tubulin	23619	Isocitrate lyase and phosphorylmutase	24495	Alcohol dehydrogenase, zinc-binding	23960	YjgF-like protein	24771	Tubulin/FtsZ,		Dihydroxy-acid and 6-phosphogluconate dehydratase
24776	ARF/SAR superfamily	24771	Tubulin/FtsZ, GTPase	23619	Isocitrate lyase	24495	Alcohol dehydrogenase GroES-like	23960	Endoribonuclease L-PSP/chorismate mutase-like	24779	Chitin synthase		Dihydroxy-acid dehydratase
24776	Ras GTPase	24771	Tubulin/FtsZ,	23619	Pyruvate/Phosphoenolpyruvate kinase, catalytic core	24495	Alcohol dehydrogenase, zinc-containing, conserved site	23963	Thiamine pyrophosphate enzyme, region	24779	Chitin synthase		Dimeric alpha-beta barrel
24776	Ras small GTPase, Rab type	24776	ARF/SAR superfamily	23656	bZIP transcription factor, bZIP-1	24495	GroES-like	23963	Thiamine pyrophosphate enzyme, TPP-binding	24785	Glycoside hydrolase family 2, immunoglobulin-like beta-sandwich		D-isomer specific 2-hydroxyacid dehydrogenase_ catalytic region
24776	ADP-ribosylation factor	24776	Ras GTPase	23656	Basic-leucine zipper (bZIP) transcription factor	24495	NAD(P)-binding	23963	Thiamine pyrophosphate enzyme, TPP binding region	24785	Galactose-binding like		D-isomer specific 2-hydroxyacid dehydrogenase_ NAD-binding
24776	GTP-binding protein SAR1	24776	Ras small GTPase, Rab type	23689	Peptidase A1	24496	Ribosomal protein L6	23963	Pyruvate decarboxylase/indolepyruvate decarboxylase	24785	GH catalytic core		Dopa 4_5-dioxygenase
24776	Small GTP-binding protein	24776	ADP-ribosylation factor	23689	Peptidase aspartic, active site	24551	Ribosomal protein S3Ae	23966	GH30	24808	Cytochrome b5		Dullard-like phosphatase domain
24777	AAA ATPase, core	24776	GTP-binding protein SAR1	23689	Peptidase aspartic, catalytic	24574	Glucose-6-phosphate dehydrogenase	23966	GH catalytic core	24864	Major intrinsic protein		Dynamin central region
24777	AAA+ ATPase, core	24776	Small GTP-binding protein	23705	Actin-binding, cofilin/tropomyosin type	24574	NAD(P)-binding	24032	Ribosomal protein L25/L23	24864	Ferritin/ribonucleotide reductase-like		Dynamin GTPase effector
24785	Glycoside hydrolase family 2, immunoglobulin-like beta-sandwich	24785	Glycoside hydrolase family 2, immunoglobulin-like beta-sandwich	23952	Cytochrome P450	24593	Iron-containing alcohol dehydrogenase	24032	Ribosomal protein L23/L25,	25027	Sugar transporter		Dynamin_ GTPase region
24785	Galactose-binding like	24785	Galactose-binding like	23960	Endoribonuclease L-PSP	24664	Alcohol dehydrogenase, zinc-binding	24032	Ribosomal protein L23, conserved site	25027	General substrate transporter		Dynein light chain_ type 1 and 2
24785	GH catalytic core	24785	GH catalytic core	23960	YjgF-like protein	24664	Alcohol dehydrogenase GroES-like	24032	Ribosomal protein L23/L15e, core	25027	Major facilitator superfamily		E1-E2 ATPase-associated region
24808	Cytochrome b5	24808	Cytochrome b5	23960	Endoribonuclease L-PSP/chorismate mutase-like	24664	Alcohol dehydrogenase class III/S-(hydroxymethyl)glutathione dehydrogenase	24056	GH20	25027	Sugar transporter, conserved site		E3 ubiquitin ligase_ SCF complex_ Skp subunit
24864	Major intrinsic protein	24864	Major intrinsic protein	23963	Thiamine pyrophosphate enzyme, region	24664	Alcohol dehydrogenase, zinc-containing, conserved site	24056	GH20, catalytic core	25027	MFS general substrate transporter		EGF-like region_ conserved site
24864	Ferritin/ribonucleotide reductase-like	24864	Ferritin/ribonucleotide reductase-like	23963	Thiamine pyrophosphate enzyme, TPP-binding	24664	GroES-like	24056	Beta-N-acetylhexosaminidase-like	25040	Peptidoglycan-binding LysM		Electron transfer flavoprotein_ alpha subunit
24880	Alkyl hydroperoxide reductase/ Thiol specific antioxidant/ Mal allergen	24953	Glucose-methanol-choline oxidoreductase,	23963	Thiamine pyrophosphate enzyme, TPP binding region	24664	NAD(P)-binding	24056	GH catalytic core	25044	Cyclopropane-fatty-acyl-phospholipid synthase		Electron transfer flavoprotein_ alpha subunit_ C-terminal
24880	Thioredoxin-like fold	24953	Glucose-methanol-choline oxidoreductase,	23963	Pyruvate decarboxylase/indolepyruvate decarboxylase	24730	RNA recognition motif, RNP-1	24105	Concanavalin A-like lectin/glucanase	25098	Aldo/keto reductase		Electron transfer flavoprotein_ alpha/beta-subunit_ N-terminal
24953	Glucose-methanol-choline oxidoreductase,	24953	Glucose-methanol-choline oxidoreductase	23966	GH30	24776	ARF/SAR superfamily	24190	GH12	25098	Potassium channel, voltage-dependent, beta subunit, KCNAB-related		Elongation factor G_ III and V
24953	Glucose-methanol-choline oxidoreductase,	25027	Sugar transporter	23966	GH catalytic core	24776	Ras GTPase	24190	Concanavalin A-like lectin/glucanase	25102	Peptidase S53, propeptide		Endoribonuclease L-PSP
24953	Glucose-methanol-choline oxidoreductase	25027	General substrate transporter	24056	GH20	24776	Ras small GTPase, Rab type	24207	Ribosomal protein L1	25102	Peptidase S8 and S53, subtilisin, kexin, sedolisin		Endoribonuclease L-PSP/chorismate mutase-like
25027	Sugar transporter	25027	Major facilitator superfamily	24056	GH20, catalytic core	24776	ADP-ribosylation factor	24430	Peptidase A1	25102	Proteinase inhibitor, propeptide		Enolase
25027	General substrate transporter	25027	Sugar transporter, conserved site	24056	Beta-N-acetylhexosaminidase-like	24776	GTP-binding protein SAR1	24430	Peptidase aspartic, active site	25338	AMP-dependent synthetase and ligase		Epoxide hydrolase-like
25027	Major facilitator superfamily	25027	MFS general substrate transporter	24056	GH catalytic core	24776	Small GTP-binding protein	24430	Peptidase aspartic, catalytic	25338	Male sterility, NAD-binding		Esterase_ SGNH hydrolase-type
25027	Sugar transporter, conserved site	25098	Aldo/keto reductase	24105	Concanavalin A-like lectin/glucanase	24777	AAA ATPase, core	24436	Ribosomal protein L18/L5	25338	Phosphopantetheine-binding		Eukaryotic initiation factor 1A (eIF-1A)
25027	MFS general substrate transporter	25098	Potassium channel, voltage-dependent, beta subunit, KCNAB-related	24112	Chitin synthase	24777	AAA+ ATPase, core	24436	Ribosomal protein L5, eukaryotic	25338	Acyl carrier protein-like		Eukaryotic initiation factor 5A hypusine (eIF-5A)
25098	Aldo/keto reductase	25144	Ribosomal protein L4/L1e	24112	Chitin synthase	24779	Chitin synthase	24486	Ribosomal protein L6E	25338	NAD(P)-binding		Eukaryotic translation initiation factor SUI1
25098	Potassium channel, voltage-dependent, beta subunit, KCNAB-related	25144	Ribosomal protein L4/L1e, conserved site	24190	GH12	24779	Chitin synthase	24493	Methionine synthase, vitamin-B12 independent	25378	General substrate transporter		Extracellular membrane protein_ 8-cysteine region_ CFEM
25144	Ribosomal protein L4/L1e	25168	Alpha/beta hydrolase fold-1	24190	Concanavalin A-like lectin/glucanase	24785	Glycoside hydrolase family 2, immunoglobulin-like beta-sandwich	24493	Cobalamin (vitamin B12)-independent methionine synthase MetE,	25378	Sugar transporter		Extracellular membrane protein_ 8-cysteine region_ fungi
25144	Ribosomal protein L4/L1e, conserved site	25288	Peptidase A1	24207	Ribosomal protein L1	24785	Galactose-binding like	24493	5-methyltetrahydropteroyltriglutamate--homocysteine S-methyltransferase	25378	Major facilitator superfamily		FAD-binding 8
25168	Alpha/beta hydrolase fold-1	25288	Peptidase aspartic, active site	24273	Aldehyde dehydrogenase	24785	GH catalytic core	24496	Ribosomal protein L6	25378	MFS general substrate transporter		FAD-binding_ type 1
25288	Peptidase A1	25288	Peptidase aspartic, catalytic	24273	Delta-1-pyrroline-5-carboxylate dehydrogenase 1	24880	Alkyl hydroperoxide reductase/ Thiol specific antioxidant/ Mal allergen	24551	Ribosomal protein S3Ae	25474	Ribosomal protein S10		FAD-dependent pyridine nucleotide-disulphide oxidoreductase
25288	Peptidase aspartic, active site	25338	AMP-dependent synthetase and ligase	24273	Aldehyde dehydrogenase, conserved site	24880	Thioredoxin-like fold	24698	Aminotransferase, class I and II	25474	Ribosomal protein S10		Fatty acid desaturase_ type 1
25288	Peptidase aspartic, catalytic	25338	Male sterility, NAD-binding	24273	Aldehyde/histidinol dehydrogenase	24923	Actin/actin-like	24698	Tetrapyrrole biosynthesis, 5-aminolevulinic acid synthase	25493	Ras GTPase		Fatty acid desaturase_ type 1_ N-terminal
25338	AMP-dependent synthetase and ligase	25338	Phosphopantetheine-binding	24289	Short-chain dehydrogenase/reductase SDR	24923	Actin, conserved site	24698	Aminotransferase, class-II, pyridoxal-phosphate binding site	25493	Ras		Ferric reductase_ NAD binding
25338	Male sterility, NAD-binding	25338	Acyl carrier protein-like	24289	Glucose/ribitol dehydrogenase	24953	Glucose-methanol-choline oxidoreductase,	24698	Pyridoxal phosphate-dependent transferase, major region	25493	Ras small GTPase, Ras type		Ferric reductase-like transmembrane component_ N-terminal
25338	Phosphopantetheine-binding	25338	NAD(P)-binding	24289	NAD(P)-binding	24953	Glucose-methanol-choline oxidoreductase,	24730	RNA recognition motif, RNP-1	25493	Ras small GTPase, Rho type		Ferritin/ribonucleotide reductase-like
25338	Acyl carrier protein-like	25349	Protein of unknown function DUF1479	24346	14-3-3 protein	24953	Glucose-methanol-choline oxidoreductase	24731	GH catalytic core	25493	Ras small GTPase, Rab type		Flavocytochrome c
25338	NAD(P)-binding	25378	General substrate transporter	24430	Peptidase A1	25027	Sugar transporter	24771	Tubulin	25493	Ran GTPase		Flavodoxin/nitric oxide synthase
25349	Protein of unknown function DUF1479	25378	Sugar transporter	24430	Peptidase aspartic, active site	25027	General substrate transporter	24771	Alpha tubulin	25493	Small GTP-binding protein		Flavodoxin-like
25378	General substrate transporter	25378	Major facilitator superfamily	24430	Peptidase aspartic, catalytic	25027	Major facilitator superfamily	24771	Tubulin/FtsZ, GTPase	25706	Lactate/malate dehydrogenase		Flavoprotein pyridine nucleotide cytochrome reductase
25378	Sugar transporter	25378	MFS general substrate transporter	24486	Ribosomal protein L6E	25027	Sugar transporter, conserved site	24771	Tubulin/FtsZ,	25706	L-lactate/malate dehydrogenase		FMN-dependent alpha-hydroxy acid dehydrogenase
25378	Major facilitator superfamily	25400	Ribosomal protein 60S	24517	Ubiquitin-activating enzyme, E1	25027	MFS general substrate transporter	24779	Chitin synthase	25706	Malate dehydrogenase, NAD-dependent, eukaryotes and gamma proteobacteria		FMN-dependent alpha-hydroxy acid dehydrogenase_ active site
25378	MFS general substrate transporter	25400	Ribosomal protein L10	24517	UBA/THIF-type NAD/FAD binding fold	25040	Peptidoglycan-binding LysM	24779	Chitin synthase	25706	Malate dehydrogenase, active site		Formate/nitrite transporter
25400	Ribosomal protein 60S	25474	Ribosomal protein S10	24517	Ubiquitin-activating enzyme repeat	25098	Aldo/keto reductase	24785	Glycoside hydrolase family 2, immunoglobulin-like beta-sandwich	25706	NAD(P)-binding		Fructose-bisphosphate aldolase_ class II_ yeast/E. coli subtype
25400	Ribosomal protein L10	25474	Ribosomal protein S10	24517	Molybdenum cofactor biosynthesis	25098	Potassium channel, voltage-dependent, beta subunit, KCNAB-related	24785	Galactose-binding like	25706	Lactate dehydrogenase/GH4,		Fumarate reductase/succinate dehydrogenase flavoprotein_ N-terminal
25443	Oligopeptide transporter OPT superfamily	25621	Fungal pheromone STE3 GPCR	24551	Ribosomal protein S3Ae	25144	Ribosomal protein L4/L1e	24785	GH catalytic core	26027	Ribosomal protein L11		Fungal fruit body lectin
25474	Ribosomal protein S10	25621	Pheromone B alpha-1 receptor	24643	RHO protein GDP dissociation inhibitor	25144	Ribosomal protein L4/L1e, conserved site	24808	Cytochrome b5	26055	Mitochondrial carrier protein		Fungal G-protein_ alpha subunit
25474	Ribosomal protein S10	25645	Bacterial alpha-L-rhamnosidase	24643	Immunoglobulin E-set	25338	AMP-dependent synthetase and ligase	24864	Major intrinsic protein	26055	Adenine nucleotide translocator 1		Fungal pheromone STE3 GPCR
25489	Metal-dependent phosphohydrolase, HD region, subdomain	25645	Six-hairpin glycosidase-like	24698	Aminotransferase, class I and II	25338	Male sterility, NAD-binding	24864	Ferritin/ribonucleotide reductase-like	26055	Mitochondrial substrate carrier		Fungal specific transcription factor
25489	Cyanamide hydratase, HD-type	26027	Ribosomal protein L11	24698	Tetrapyrrole biosynthesis, 5-aminolevulinic acid synthase	25338	Phosphopantetheine-binding	24880	Alkyl hydroperoxide reductase/ Thiol specific antioxidant/ Mal allergen	26082	WD40 repeat		Fungal transcriptional regulatory protein_ N-terminal
25493	Ras GTPase	26055	Mitochondrial carrier protein	24698	Aminotransferase, class-II, pyridoxal-phosphate binding site	25338	Acyl carrier protein-like	24880	Thioredoxin-like fold	26082	WD40 repeat-like		G protein alpha subunit_ helical insertion
25493	Ras	26055	Adenine nucleotide translocator 1	24698	Pyridoxal phosphate-dependent transferase, major region	25338	NAD(P)-binding	25027	Sugar transporter	26263	Thaumatin, pathogenesis-related		Galactose oxidase/kelch_ beta-propeller
25493	Ras small GTPase, Ras type	26055	Mitochondrial substrate carrier	24769	Globin-like	25340	Transketolase,	25027	General substrate transporter	26268	Ribosomal protein S5,		Galactose-binding like
25493	Ras small GTPase, Rho type	26082	WD40 repeat	24777	AAA ATPase, core	25340	Transketolase, region	25027	Major facilitator superfamily	26268	Ribosomal protein S5,		General substrate transporter
25493	Ras small GTPase, Rab type	26082	WD40 repeat-like	24777	AAA+ ATPase, core	25340	Transketolase,	25027	Sugar transporter, conserved site	26268	Ribosomal protein S5		Germin
25493	Ran GTPase	26124	Ribosomal protein S13	24880	Alkyl hydroperoxide reductase/ Thiol specific antioxidant/ Mal allergen	25340	Transketolase, /Pyruvate-ferredoxin oxidoreductase,	25027	MFS general substrate transporter	26286	GH catalytic core		Globin-like
25493	Small GTP-binding protein	26124	Ribosomal protein S13-like, H2TH	24880	Thioredoxin-like fold	25349	Protein of unknown function DUF1479	25040	Peptidoglycan-binding LysM	26301	Oligopeptide transporter OPT superfamily		Glucose/ribitol dehydrogenase
25621	Fungal pheromone STE3 GPCR	26129	RPEL repeat	24923	Actin/actin-like	25378	General substrate transporter	25098	Aldo/keto reductase	26301	Hydroxymethylglutaryl-CoA reductase, class I/II, catalytic		Glucose-methanol-choline oxidoreductase
25621	Pheromone B alpha-1 receptor	26263	Thaumatin, pathogenesis-related	24923	Actin, conserved site	25378	Sugar transporter	25098	Potassium channel, voltage-dependent, beta subunit, KCNAB-related	26308	Ribosomal protein S8e		Glucose-methanol-choline oxidoreductase_ C-terminal
25706	Lactate/malate dehydrogenase	26268	Ribosomal protein S5,	25098	Aldo/keto reductase	25378	Major facilitator superfamily	25102	Peptidase S53, propeptide	26312	UTP--glucose-1-phosphate uridylyltransferase		Glucose-methanol-choline oxidoreductase_ N-terminal
25706	L-lactate/malate dehydrogenase	26268	Ribosomal protein S5,	25098	Potassium channel, voltage-dependent, beta subunit, KCNAB-related	25378	MFS general substrate transporter	25102	Peptidase S8 and S53, subtilisin, kexin, sedolisin	26312	UTP--glucose-1-phosphate uridylyltransferase, subgroup		Glutamate decarboxylase
25706	Malate dehydrogenase, NAD-dependent, eukaryotes and gamma proteobacteria	26268	Ribosomal protein S5	25253	Carbonic anhydrase	25400	Ribosomal protein 60S	25102	Proteinase inhibitor, propeptide	26473	Peptidase A1		Glutaredoxin
25706	Malate dehydrogenase, active site	26280	Ribosomal protein S7	25288	Peptidase A1	25400	Ribosomal protein L10	25168	Alpha/beta hydrolase fold-1	26473	Peptidase aspartic, active site		Glutaredoxin active site
25706	NAD(P)-binding	26280	Ribosomal protein S7	25288	Peptidase aspartic, active site	25443	Oligopeptide transporter OPT superfamily	25288	Peptidase A1	26473	Aminoacyl-tRNA synthetase, class I, conserved site		Glutaredoxin subgroup
25706	Lactate dehydrogenase/GH4,	26286	GH catalytic core	25288	Peptidase aspartic, catalytic	25474	Ribosomal protein S10	25288	Peptidase aspartic, active site	26473	Peptidase aspartic, catalytic		Glutaredoxin_ eukaryotic and viruses
25778	Translation elongation factor EF1B, beta and delta chains, guanine nucleotide exchange	26301	Oligopeptide transporter OPT superfamily	25340	Transketolase,	25474	Ribosomal protein S10	25288	Peptidase aspartic, catalytic	26521	Mitochondrial substrate carrier		Glutaredoxin-related protein
25778	Inorganic pyrophosphatase	26301	Hydroxymethylglutaryl-CoA reductase, class I/II, catalytic	25340	Transketolase, region	25530	Heat shock protein Hsp20	25340	Transketolase,	26527	Dopa 4,5-dioxygenase		Glutathione degradosome_ DUG1
25778	Translation elongation factor EF1B, beta/delta chains, conserved site	26308	Ribosomal protein S8e	25340	Transketolase,	25530	HSP20-like chaperone	25340	Transketolase, region	26561	Ribosomal protein S19/S15		Glutathione S-transferase_ C-terminal
25778	Glutathione S-transferase, -like	26521	Mitochondrial substrate carrier	25340	Transketolase, /Pyruvate-ferredoxin oxidoreductase,	25594	Rare lipoprotein A	25340	Transketolase,	26561	Ribosomal protein S15		Glutathione S-transferase_ C-terminal-like
26027	Ribosomal protein L11	26527	Dopa 4,5-dioxygenase	25349	Protein of unknown function DUF1479	25594	Barwin-related endoglucanase	25340	Transketolase, /Pyruvate-ferredoxin oxidoreductase,	26561	TonB box, conserved site		Glutathione S-transferase_ N-terminal
26055	Mitochondrial carrier protein	26561	Ribosomal protein S19/S15	25378	General substrate transporter	25621	Fungal pheromone STE3 GPCR	25349	Protein of unknown function DUF1479	26703	Legume lectin, beta domain		Glycerol dehydrogenase
26055	Adenine nucleotide translocator 1	26561	Ribosomal protein S15	25378	Sugar transporter	25621	Pheromone B alpha-1 receptor	25378	General substrate transporter	27002	Ribosomal protein S26e		Glycerol kinase
26055	Mitochondrial substrate carrier	26561	TonB box, conserved site	25378	Major facilitator superfamily	25645	Bacterial alpha-L-rhamnosidase	25378	Sugar transporter	27029	Cytochrome P450		Glycogen/starch/alpha-glucan phosphorylase
26082	WD40 repeat	26576	Oxidoreductase,	25378	MFS general substrate transporter	25645	Six-hairpin glycosidase-like	25378	Major facilitator superfamily	27029	Cytochrome P450, E-class, group I		Glycoside hydrolase family 2_ immunoglobulin-like beta-sandwich
26082	WD40 repeat-like	26576	NAD(P)-binding	25400	Ribosomal protein 60S	25687	Heat shock protein 70	25378	MFS general substrate transporter	27079	Hydroxymethylglutaryl-CoA reductase, class I/II, catalytic		Glycoside hydrolase/deacetylase_ beta/alpha-barrel
26124	Ribosomal protein S13	26703	Legume lectin, beta domain	25400	Ribosomal protein L10	25687	Heat shock protein Hsp70	25400	Ribosomal protein 60S	27079	Hydroxymethylglutaryl-CoA reductase, class I, catalytic		Glycoside hydrolase_ 48F
26124	Ribosomal protein S13-like, H2TH	26848	GH catalytic core	25443	Oligopeptide transporter OPT superfamily	25706	Lactate/malate dehydrogenase	25400	Ribosomal protein L10	27079	Sterol-sensing 5TM box		Glycoside hydrolase_ catalytic core
26263	Thaumatin, pathogenesis-related	27002	Ribosomal protein S26e	25489	Metal-dependent phosphohydrolase, HD region, subdomain	25706	L-lactate/malate dehydrogenase	25443	Oligopeptide transporter OPT superfamily	27079	Orn/DAP/Arg decarboxylase 2		Glycoside hydrolase_ chitinase active site
26268	Ribosomal protein S5,	27029	Cytochrome P450	25489	Cyanamide hydratase, HD-type	25706	Malate dehydrogenase, NAD-dependent, eukaryotes and gamma proteobacteria	25474	Ribosomal protein S10	27079	Hydroxymethylglutaryl-CoA reductase, class I/II, NAD/NADP-binding		Glycoside hydrolase_ clan GH-D
26268	Ribosomal protein S5,	27029	Cytochrome P450, E-class, group I	25493	Ras GTPase	25706	Malate dehydrogenase, active site	25474	Ribosomal protein S10	27079	Hydroxymethylglutaryl-CoA reductase, class I/II, substrate-binding		Glycoside hydrolase_ family 10
26268	Ribosomal protein S5	27117	GroES-related	25493	Ras	25706	NAD(P)-binding	25489	Metal-dependent phosphohydrolase, HD region, subdomain	27117	GroES-related		Glycoside hydrolase_ family 12
26280	Ribosomal protein S7	27117	Alcohol dehydrogenase, zinc-binding	25493	Ras small GTPase, Ras type	25706	Lactate dehydrogenase/GH4,	25489	Cyanamide hydratase, HD-type	27117	Alcohol dehydrogenase, zinc-binding		Glycoside hydrolase_ family 16
26280	Ribosomal protein S7	27117	Alcohol dehydrogenase GroES-like	25493	Ras small GTPase, Rho type	25747	Esterase, SGNH hydrolase-type	25493	Ras GTPase	27117	Alcohol dehydrogenase GroES-like		Glycoside hydrolase_ family 18_ catalytic domain
26286	GH catalytic core	27117	Alcohol dehydrogenase, zinc-containing, conserved site	25493	Ras small GTPase, Rab type	25914	Dihydroxy-acid and 6-phosphogluconate dehydratase	25493	Ras	27117	Alcohol dehydrogenase, zinc-containing, conserved site		Glycoside hydrolase_ family 20
26301	Oligopeptide transporter OPT superfamily	27117	GroES-like	25493	Ran GTPase	25914	Dihydroxy-acid dehydratase	25493	Ras small GTPase, Ras type	27117	GroES-like		Glycoside hydrolase_ family 20_ catalytic core
26301	Hydroxymethylglutaryl-CoA reductase, class I/II, catalytic	27117	NAD(P)-binding	25493	Small GTP-binding protein	26027	Ribosomal protein L11	25493	Ras small GTPase, Rho type	27117	NAD(P)-binding		Glycoside hydrolase_ family 27
26308	Ribosomal protein S8e	27179	S-adenosyl-L-homocysteine hydrolase, NAD binding	25621	Fungal pheromone STE3 GPCR	26055	Mitochondrial carrier protein	25493	Ras small GTPase, Rab type	27179	S-adenosyl-L-homocysteine hydrolase, NAD binding		Glycoside hydrolase_ family 28
26561	Ribosomal protein S19/S15	27179	S-adenosyl-L-homocysteine hydrolase	25621	Pheromone B alpha-1 receptor	26055	Adenine nucleotide translocator 1	25493	Ran GTPase	27179	S-adenosyl-L-homocysteine hydrolase		Glycoside hydrolase_ family 3_ C-terminal
26561	Ribosomal protein S15	27179	NAD(P)-binding	25634	Lipocalin	26055	Mitochondrial substrate carrier	25493	Small GTP-binding protein	27179	NAD(P)-binding		Glycoside hydrolase_ family 3_ N-terminal
26561	TonB box, conserved site	27321	Sugar transporter	25634	Rho GTPase activation protein	26124	Ribosomal protein S13	25594	Rare lipoprotein A	27339	Tubulin		Glycoside hydrolase_ family 30
26576	Oxidoreductase,	27321	General substrate transporter	25687	Heat shock protein 70	26124	Ribosomal protein S13-like, H2TH	25594	Barwin-related endoglucanase	27339	Beta tubulin		Glycoside hydrolase_ family 31
26576	NAD(P)-binding	27321	Major facilitator superfamily	25687	Heat shock protein Hsp70	26129	RPEL repeat	25621	Fungal pheromone STE3 GPCR	27339	Tubulin/FtsZ, GTPase		Glycoside hydrolase_ family 47
26703	Legume lectin, beta domain	27321	Sugar transporter, conserved site	25706	Lactate/malate dehydrogenase	26280	Ribosomal protein S7	25621	Pheromone B alpha-1 receptor	27339	Tubulin/FtsZ,		Glycoside hydrolase_ family 5
26848	GH catalytic core	27321	MFS general substrate transporter	25706	L-lactate/malate dehydrogenase	26280	Ribosomal protein S7	25687	Heat shock protein 70	27339	Beta tubulin, autoregulation binding site		Glycosyl hydrolase 92
26925	Peptidase M20	27437	Cerato-platanin	25706	Malate dehydrogenase, NAD-dependent, eukaryotes and gamma proteobacteria	26301	Oligopeptide transporter OPT superfamily	25687	Heat shock protein Hsp70	27402	Cell division/GTP binding protein		Glycosyl hydrolase_ family 13_ catalytic region
26925	Peptidase M20, dimerisation	27688	Aldo/keto reductase	25706	Malate dehydrogenase, active site	26301	Hydroxymethylglutaryl-CoA reductase, class I/II, catalytic	25706	Lactate/malate dehydrogenase	27402	Septin		Glycosyl hydrolase_ family 13_ subfamily_ catalytic region
26925	Glutathione degradosome, DUG1	27721	Ribosomal protein L15	25706	NAD(P)-binding	26308	Ribosomal protein S8e	25706	L-lactate/malate dehydrogenase	27632	Histone H2B		Glycosyl transferase_ family 35
26925	ArgE/DapE/ACY1/CPG2/YscS, conserved site	27735	Peptidase C14, caspase catalytic	25706	Lactate dehydrogenase/GH4,	26473	Peptidase A1	25706	Malate dehydrogenase, NAD-dependent, eukaryotes and gamma proteobacteria	27632	Histone core		Glycosyl transferase_ group 1
27002	Ribosomal protein S26e	27737	Peptidase C14, caspase catalytic	25747	Esterase, SGNH hydrolase-type	26473	Peptidase aspartic, active site	25706	Malate dehydrogenase, active site	27632	Histone-fold		Glyoxal oxidase_ N-terminal
27179	S-adenosyl-L-homocysteine hydrolase, NAD binding	27770	Alcohol dehydrogenase, zinc-binding	25778	Translation elongation factor EF1B, beta and delta chains, guanine nucleotide exchange	26473	Aminoacyl-tRNA synthetase, class I, conserved site	25706	NAD(P)-binding	27721	Ribosomal protein L15		GNS1/SUR4 membrane protein
27179	S-adenosyl-L-homocysteine hydrolase	27770	Alcohol dehydrogenase GroES-like	25778	Inorganic pyrophosphatase	26473	Peptidase aspartic, catalytic	25706	Lactate dehydrogenase/GH4,	27735	Peptidase C14, caspase catalytic		GPCR_ rhodopsin-like
27179	NAD(P)-binding	27770	Aminotransferase, class-II, pyridoxal-phosphate binding site	25778	Translation elongation factor EF1B, beta/delta chains, conserved site	26521	Mitochondrial substrate carrier	25778	Translation elongation factor EF1B, beta and delta chains, guanine nucleotide exchange	27737	Peptidase C14, caspase catalytic		GPR1/FUN34/yaaH
27321	Sugar transporter	27770	GroES-like	25778	Glutathione S-transferase, -like	26561	Ribosomal protein S19/S15	25778	Inorganic pyrophosphatase	27751	Heterokaryon incompatibility Het-C		G-protein_ beta subunit
27321	General substrate transporter	27770	NAD(P)-binding	25914	Dihydroxy-acid and 6-phosphogluconate dehydratase	26561	Ribosomal protein S15	25778	Translation elongation factor EF1B, beta/delta chains, conserved site	27787	Acyl-CoA N-acyltransferase		G-protein_ gamma subunit
27321	Major facilitator superfamily	27787	Acyl-CoA N-acyltransferase	25914	Dihydroxy-acid dehydratase	26561	TonB box, conserved site	25778	Glutathione S-transferase, -like	27888	Serine/threonine-specific protein phosphatase and bis(5-nucleosyl)-tetraphosphatase		G-protein_ gamma-like subunit
27321	Sugar transporter, conserved site	27892	Ras GTPase	26027	Ribosomal protein L11	26564	Histone H2A	26027	Ribosomal protein L11	27888	Metallophosphoesterase		GroES-like
27321	MFS general substrate transporter	27892	Ras	26055	Mitochondrial carrier protein	26564	Histone core	26055	Mitochondrial carrier protein	27933	Peptidase S53, propeptide		GroES-related
27437	Cerato-platanin	27892	Ras small GTPase, Ras type	26055	Adenine nucleotide translocator 1	26564	Histone-fold	26055	Adenine nucleotide translocator 1	27933	Peptidase S8 and S53, subtilisin, kexin, sedolisin		GTP-binding protein SAR1
27688	Aldo/keto reductase	27892	Ras small GTPase, Rho type	26055	Mitochondrial substrate carrier	26576	Oxidoreductase,	26055	Mitochondrial substrate carrier	27933	Proteinase inhibitor, propeptide		Guanine nucleotide binding protein (G-protein)_ alpha subunit
27721	Ribosomal protein L15	27892	Ras small GTPase, Rab type	26082	WD40 repeat	26576	NAD(P)-binding	26082	WD40 repeat	28025	Phenylalanine/histidine ammonia-lyase		Guanine nucleotide-binding protein_ beta subunit
27737	Peptidase C14, caspase catalytic	27892	Small GTP-binding protein	26082	WD40 repeat-like	26667	GH3,	26082	WD40 repeat-like	28025	Phenylalanine ammonia-lyase		H+ transporting ATPase_ proton pump
27770	Alcohol dehydrogenase, zinc-binding	27906	Chitin-binding, type 1	26252	GH5	26667	GH3,	26263	Thaumatin, pathogenesis-related	28025	L-Aspartase-like		Haem peroxidase
27770	Alcohol dehydrogenase GroES-like	27906	GH16	26252	TonB box, conserved site	26667	GH catalytic core	26268	Ribosomal protein S5,	28089	Peptidase S8 and S53, subtilisin, kexin, sedolisin		Haem peroxidase_ animal
27770	Aminotransferase, class-II, pyridoxal-phosphate binding site	27906	Aldehyde dehydrogenase, conserved site	26252	GH catalytic core	26681	Cytochrome P450	26268	Ribosomal protein S5,	28089	Proteinase inhibitor I9, subtilisin propeptide		Haem peroxidase_ plant/fungal/bacterial
27770	GroES-like	27906	Concanavalin A-like lectin/glucanase	26301	Oligopeptide transporter OPT superfamily	26681	Cytochrome P450, E-class, group I	26268	Ribosomal protein S5	28089	Proteinase inhibitor, propeptide		Haloacid dehalogenase-like hydrolase
27770	NAD(P)-binding	27933	Peptidase S53, propeptide	26301	Hydroxymethylglutaryl-CoA reductase, class I/II, catalytic	26703	Legume lectin, beta domain	26286	GH catalytic core	28126	Peptidase S53, propeptide		HEAT
[truncated: 626 more rows]

## Sheet: GSE64897
COP					HYP					SEL
[truncated: 12,230 more rows]

[truncated: 4 more sheets: GSE64897-Final Results, GSE35333, GSE35333_final, GSE108189-Gt]
